# Supplementary material for: Evolutionarily novel genes are expressed in transgenic fish tumors and their orthologs are involved in development of progressive traits in humans
Source: Infect Agent Cancer. 2019 Dec 5;14:46. doi: 10.1186/s13027-019-0262-5 (PMC6896781; doi:10.1186/s13027-019-0262-5)
Supplement: Supplementary file 5 — Additional file 5. The List of manually curated sample of 1502 genes, not expressed in normal liver, expressed in tumors and in tumors after regression. [file 13027_2019_262_MOESM5_ESM.xls]

## Sheet: Лист1
The List of manually curated sample of 1502 genes, not expressed in normal liver, expressed in tumors and in tumors after regression
Selected Tag Sequence	Sample	#Tags	AD	HCC	Note	REG	Gene	Description	UniGene	Hs	Changes	HTGS	LG
CATGAAGAACTGGCAACTGCGCTGGTT	6M T	1	0	1		N	arhgap22	Rho GTPase activating protein 22	Dr.92356	ARHGAP22
CATGAAGCACTGCACTCAGGGATTTCA	6M T	1	0	1		N	LOC560627	cytosolic 5'-nucleotidase 1A-like	Dr.106286	NT5C1B		NW_003336227.1	25
CATGTTTAAGATCTGACTTCTTTAAAA	2M T	1	1	0			aadacl4	arylacetamide deacetylase-like 4	Dr.83132	AADACL4		BX470199.6	11
CATGTTGCTGAAGCGCGTGCATCACTC	6M T	1	0	2			abca12	ATP-binding cassette, sub-family A (ABC1), member 12	Dr.75341	ABCA12		CR753890.27	9
CATGTTCTGGTGCACATCCAGGATGTT	2M T	1	1	0			abca4b	ATP-binding cassette, sub-family A (ABC1), member 4b	Dr.85757	ABCA4		CR450809.6	2
CATGATGTATCCGCGGTTGTTCCTCCT	6M T	1	0	1			LOC795669	multidrug resistance-associated protein 1-like	ND	ABCC3		CT030207.22	12
CATGCTCCCATCAGATTCTTTGATGTC	2M T	1	1	0			abcc9	ATP-binding cassette, sub-family C (CFTR/MRP), member 9	Dr.94171	ABCC9		BX571719.3	4
CATGTTCTAAATAAAAGCAACGGCACG	2-6M T	1	1	1			abcg1	ATP-binding cassette, sub-family G (WHITE), member 1	Dr.118138	ABCG1		CU633612.8	15
CATGACGACAGGCCGCAAGGCGCTCCT	6M T	1	0	1			abhd11	abhydrolase domain containing 11	Dr.36510	ABHD11		CR388166.7	21
CATGGACCGCGTTTTTCGTCAGTTCAC	2-6M T	1	1	1			abhd3	abhydrolase domain containing 3	Dr.36440	ABHD3		CU682364.6	2
CATGGCACAGGTTCAGGTATTGCTGTA	2-6M T	1	1	2			si:ch211-253h3.1	sim to ABR | active BCR-related	Dr.115116	ABR		CR394528.18	5
CATGGAGCTGAGCTATTGTAGAGCTTC	2M T	1	1	0			LOC100148657	neurotactin-like	Dr.141181	ACHE		CR792424.27	18
CATGGAGTTGATAATGGCATTTTGATT	2M T	1	1	0			si:ch211-205h19.1	sim to ACOXL | acyl-CoA oxidase-like	Dr.117662	ACOXL		BX120012.24	13
CATGCGGTCTGTGGAATGGTATGCCCT	2-6M T	1	1	1			actl6b	actin-like 6B	Dr.92092	ACTL6B		CU633916.5	23
CATGCAGCGCAGCACCAGCATCATCAG	2-6M T	1	1	2			LOC100331014	activin receptor type-2A-like	Dr.115203	ACVR2A		CU570699.15	6
CATGGAGAAGCCGTCTTCCGGACGCTA	6M T	1	0	1			LOC100331938	activin receptor type-2B-like	Dr.108084	ACVR2B		BX908782.7	2
CATGTGCTGCCAGCAGAGAGATAAACC	2M T	1	1	0			si:ch1073-396h14.1	sim to ADAM10 | ADAM metallopeptidase domain 10	Dr.103303	ADAM10		BX901933.15	22
CATGCAGACTGAGAATGTTTTGGATAG	6M T	1	0	1			adam19a	a disintegrin and metalloproteinase domain 19a	Dr.83147	ADAM19		CR339045.13	7
CATGTGGATAATGCTTCACACACTCGT	2-6M T	1	1	1			adam9	a disintegrin and metalloproteinase domain 9	Dr.134464	ADAM9		CR388058.8	8
CATGTCTGGTCCCTTGGCTGTTATCCT	6M T	1	0				adamtsl3	ADAMTS-like 3	Dr.87363	ADAMTSL3		CU915279.7	7
CATGTTAAAGTCCTCCTGGAATAAAGC	2M T	1	1	0			adck5	aarF domain containing kinase 5	Dr.157905	ADCK5		CU467825.13	19
CATGTTGAGAGTCCACCATCTCAGGGG	2M T	1	1	0			LOC560410	adenylate cyclase type 8-like	Dr.118898	ADCY8		BX323819.9	17
CATGTTTTTAAAAATACTGTGTTGTTA	6M T	1	0	1			si:dkey-206f10.1	sim to ADCY8 | adenylate cyclase 8 (brain)	Dr.158389	ADCY8		BX470188.11	20
CATGGTTTTTGTTTACAGCCGTGTGTT	2M T	1	1	0			adrb2a	adrenergic receptor, beta 2a	Dr.88172	ADRB2		FP103054.5	14
CATGACGGACGGGGGTCTGTTCTTCAG	2-6M T	1	1	1			LOC567369	actin filament-associated protein 1-like 2-like	Dr.84064	AFAP1L2		BX465198.11	12
CATGACGCTTGAACCTGGTATGGTGTT	6M T	1	0	1			LOC100150765	AF4/FMR2 family member 2-like	Dr.111724	AFF2		CU469460.7	14
CATGACAGAACTGGTGCGCTACATACG	2M T	1	1	0			LOC100330019	sim to AFF3 | AF4/FMR2 family, member 3	Dr.156798	AFF3		CU539060.14	14
CATGTACTTTATAGCAGTATCTCTGAA	2M T	1	2	0			si:dkeyp-88h4.1	sim to AGL | amylo-alpha-1, 6-glucosidase, 4-alpha-glucanotransferase	Dr.109373	AGL		BX927314.11	24
CATGTCTGCAGGTTCTTCGGGTCTATT	6M T	1	0	1			agtpbp1	ATP/GTP binding protein 1	Dr.37774	AGTPBP1		BX511073.3	8
CATGAAGAGGAAAGGGGAGGACCTGAG	2M T	1	1	0			LOC795051	neuroblast differentiation-associated protein AHNAK-like	Dr.135706	AHNAK2		NW_001877327.3	13
CATGCGGCGATGATAGGAAATAATGGC	2M T	1	1	0			akap2	A kinase (PRKA) anchor protein 2	Dr.86519	AKAP2		BX294162.23	10
CATGGAGGAGGAGGAGGAGGAGGAAGA	2-6M T	1	1	1			si:ch211-199m3.4	sim to AKD1 | adenylate kinase domain containing 1	Dr.119579	AKD1		BX571790.8	20
CATGGAGACCAGTCTGAGCAAACCACC	2M T	1	2	0			LOC100331515	RAC-alpha serine/threonine-protein kinase-like	Dr.162427	AKT1		CR855301.19	17
CATGGACCTACAGCAGAGACACTGAGA	2M T	1	1	0			LOC100007229	very weak sim to ALCAM | activated leukocyte cell adhesion molecule	Dr.91250	ALCAM		AL929520.17	3
CATGTTTTCGGCACCCCATCAGGAATA	6M T	1	0	1			LOC100005580	very weak sim to ANG | angiogenin, ribonuclease, RNase A family, 5	Dr.82233	ANG		BX324006.19	16
CATGTACAGCTGTGTCACTCGGGAATT	2-6M T	1	2	1			angptl1	angiopoietin-like 1	Dr.93062	ANGPTL1		BX571854.11	20
CATGGTCAAGGTGCTTCTGGACAAGGG	2M T	1	1	0			LOC797662	ankyrin-1-like	Dr.119805	ANK1		AL773542.11	21
CATGAAGGCAGTGTGCAGTGTAGTGCA	2M T	1	1	0			ankrd31	ankyrin repeat domain 31	Dr.87062	ANKRD11		BX000437.7	5
CATGTCAGGCTGAATAATTAAAGTAAT	2M T	1	1	0			zgc:172215	sim to ANKRD50 | ankyrin repeat domain 50	Dr.148560	ANKRD50		NW_003335253.1	14
CATGTTTCTCACAGAGCCACGAGCAAA	2M T	1	1	0			ankrd6b	ankyrin repeat domain 6b	Dr.27808	ANKRD6		BX248418.16	20
CATGTTGTGTTTGTGGTAAAGTTCTTC	2M T	1	2	0			ano5b	anoctamin 5b	Dr.34877	ANO5		BX537356.4	7
CATGAGGACGAGGAACCTCCACGTCCC	6M T	1	0	1			si:dkey-21o19.6	sim to ANO7 anoctamin 7	Dr.103616	ANO7		CR925709.5	23
CATGTTCTGATGGGATGGTGGCGGTGA	6M T	1	0	1			antxr2b	anthrax toxin receptor 2b	Dr.116617	ANTXR2		BX323017.6	10
CATGCTGGTCTATCTGGCCAGTAAAGT	2M T	1	1	0			Dr.151008	sim to ARAP1 ArfGAP with RhoGAP domain, ankyrin repeat and PH domain 1	Dr.151008	ARAP1		NW_003335421.1	15
CATGGAGGTCAAAGCTCAAGATCTCTG	2M T	1	1	0			LOC559690	arf-GAP with Rho-GAP domain, ANK repeat and PH domain-containing protein 2-like	Dr.55380	ARAP2		CR848055.18	7
CATGAAGAAACTGATCCATCAACTCCC	2M T	1	1	0			LOC100003547	rho GTPase-activating protein 15	Dr.116450	ARHGAP15		BX936460.6	9
CATGATGCAAAGGGCTCATCATTCCTC	6M T	1	0	1			LOC100006233	rho GTPase-activating protein 23-like	Dr.79217	ARHGAP23		CU464118.5	3
CATGCTGGTGGAGCAGTGTGTGGACTT	2M T	1	1	0			arhgap24	Rho GTPase activating protein 24	Dr.84622	ARHGAP24		CR354555.20	21
CATGACGCGTGTTTCTCTCTCCAGCTC	6M T	1	0	1			LOC100002227	sim to ARHGEF17 | Rho guanine nucleotide exchange factor (GEF) 17	Dr.121072	ARHGEF17		BX005458.19	18
CATGACTTTCTTCAGCGCTGTCTGGAA	6M T	1	0	1			LOC570228	sim to vertebrate Rho guanine nucleotide exchange factor (GEF) 3 (ARHGEF3)	Dr.140235	ARHGEF3		AL953867.18	22
CATGAACATTAAGCTCAACAACAGAGA	2M T	1	1	0			arid3a	AT-rich interactive domain-containing protein 3A	Dr.106046	ARID3B		CR318632.9	5
CATGCCAGATTGGCATCGGGTAATTGT	6M T	1	0	1			arid5a	AT rich interactive domain 5A (MRF1-like)	Dr.85807	ARID5A		NW_001879384.3	8
CATGTCAGTGAATGGAACATTTGTTTA	2M T	1	1	0			zgc:158706	sim to ARID5A | AT rich interactive domain 5A (MRF1-like)	Dr.86898	ARID5A		CR925751.6	21
CATGAATCAATAAAACAAATGAAATAC	2M T	1	1	0			arr3a	arrestin 3, retinal (X-arrestin), like	Dr.82729	ARR3		CR545465.14	10
CATGTAAGGTGTCTATTTATGTTATAA	6M T	1	0	1			zgc:110353	weak sim to arrestin domain containing 3	Dr.91566	ARRDC3		CR391966.8	8
CATGAGGTTAATCACAGAAACATCCGG	2M T	1	1	0			LOC572216	armadillo repeat protein deleted in velo-cardio-facial syndrome-like	Dr.102017	ARVCF		CR925750.13	10
CATGAATAATATCATTACCTTCCCATT	2M T	1	1	0			asap2a	ArfGAP with SH3 domain, ankyrin repeat and PH domain 2a	Dr.80511	ASAP2		CR381585.11	17
CATGTTCAAAGAGCGCCTGAAGCCCGA	2M T	1	1	0			ascc3	activating signal cointegrator 1 complex subunit 3	Dr.67833	ASCC3		NW_001877267.3	16
CATGAGGTCCTGGATTATGCTTTGGCT	2M T	1	2	0			asic4b	acid-sensing (proton-gated) ion channel family member 4b	Dr.90335	ASIC4		CR853290.11	6
CATGGCAGAAGAAGCGGAGCTGTACCC	2M T	1	1	0			asmt	acetylserotonin O-methyltransferase	Dr.116557	ASMT		FP245397.22	1
CATGGAGTCAAATCCCTGGTGAAGTGG	2M T	1	1	0			atf7b	activating transcription factor 7b	Dr.115346	ATF7		AL929458.7	6
CATGTTCCTGAAAATTCTAAGACAGGC	2M T	1	1	0			LOC100000277	autophagy-related protein 2 homolog B-like	Dr.118975	ATG2B		CU929282.8	17
CATGGGTCTCCTCTTCCCTCTGGCACG	2M T	1	2	0			atg9b	ATG9 autophagy related 9 homolog B	Dr.94391	ATG9A		CU019563.16	24
CATGGAGGTGTGTAAGAACTGCTCGGC	6M T	1	0	1			si:dkey-211e20.10	sim to ATP11B | ATPase, class VI, type 11B	Dr.103046	ATP11B		CU137686.6	22
CATGTGGGGAATTCAGCGGGTAGAAGA	2M T	1	1	0			LOC100334666	sim to ATP13A3 | ATPase type 13A3	Dr.151633	ATP13A3		NW_003336377.1	UN
CATGTGCAGGGAGAGATTGTATAATTT	6M T	1	0	4			atp1a1a.3	ATPase, Na+/K+ transporting, alpha 1a.3 polypeptide	Dr.10713	ATP1A1		CU185242.13	1
CATGGTCACCAAAAAAAAAAAAAAAAA	2-6M T	1	30	2			atp1b2b	ATPase, Na+/K+ transporting, beta 2b polypeptide	Dr.12400	ATP1B2		CR854980.8	5
CATGAAGGGGACTTTGGTTGTACAATG	2-6M T	1	1	1			atp2b4	ATPase, Ca++ transporting, plasma membrane 4	Dr.6752	ATP2B1		BX545854.10	11
CATGCCACACGCGCACACACACACACA	6M T	1	0	1			atp2b2	ATPase, Ca++ transporting, plasma membrane 2	Dr.123119	ATP2B2		FP245482.8	11
CATGTTACCCCCGAAAAGCAGAGGAAC	2M T	1	1	0			atp6v1ab	ATPase, H+ transporting, lysosomal V1 subunit Ab	Dr.120534	ATP6V1A		CU929332.8	24
CATGTATGAGAGCTGGTATATTAGCCT	2-6M T	1	2	1			LOC566530	sim to ATPase, Class I, type 8B, member 1	Dr.157759	ATP8B1		BX004795.6	22
CATGTGCCGTTTCCTTTGTTACTTCTT	2M T	1	1	0			LOC100537096	probable phospholipid-transporting ATPase ID-like	Dr.162264	ATP8B2		CR376750.10	16
CATGGTTGAAGGGAGAGAGAATGTAGC	2M T	1	1	0			atxn1l	ataxin 1-like	ND	ATXN1L		NW_003039703.2	7
CATGTTAGATCGTCGGAGTTTCTCTCG	6M T	1	0	1			LOC100002885	sim to AVPI1 | arginine vasopressin-induced 1	Dr.113714	AVPI1		AL929041.10	1
CATGATGGAAATATCACAGAGAAGACT	6M T	1	0	1			axdnd1	axonemal dynein light chain domain containing 1	Dr.85163	AXDND1		CR381682.7	22
CATGTCACACTCTGTAATTCTGCTACC	2M T	1	1	0			LOC100002020	sim to to beta-3-galactosyltransferase	Dr.148382	B3GNT3		CR354547.11	8
CATGTCGGTTTGTTGTTAAGGCTGCTG	6M T	1	0	1			LOC100004321	apoptosis regulator BAX-like	Dr.89956	BAX		CR388062.19	3
CATGGCCTGCTCAAAAAGCTCTCCTGC	2M T	1	1	0			baz1a	bromodomain adjacent to zinc finger domain, 1A	Dr.60628	BAZ1A		BX088587.6	17
CATGACTCTGTTTCTTGTTTTGCTTTC	2-6M T	1	8	12		Y	si:dkey-174m14.3	sim to brain-enriched guanylate kinase-associated homolog	Dr.81188	BEGAIN		BX936423.12	20
CATGAAACGTAAGCGCGTGTTAAACTT	6M T	1	0	1			si:zfos-905g2.1	weak sim to BEND2 | BEN domain containing 2	Dr.9554	BEND2		CU929208.5	23
CATGTCAGGAGGAAGCAAACACAAGCT	6M T	1	0	1			si:dkeyp-21d8.1	sim to BEND5 | BEN domain containing 5	Dr.116033	BEND5		CR751544.12	8
CATGAACTTCATTTGGACAATAATCAG	2-6M T	1	1	3			bgna	biglycan a	Dr.28930	BGN		BX248385.6	8
CATGGAGACTCTGTGCAGGAAGCCAGT	2M T	1	1	0			bicc1b	bicaudal C homolog 1b	Dr.117137	BICC1		FP102277.13	12
CATGCAGAGAAGCGTGACCTTCAGCGT	6M T	1	0	1			bicc2	bicaudal C homolog 2	Dr.87655	BICC1		CU861896.13	18
CATGTCGTCCAACTGTGTCACATACTC	2M T	1	1	0			LOC557383	bicaudal D homolog 2-like	Dr.99521	BICD2		BX248521.12	11
CATGCACCGATCTGCTTGATAGATGTT	2M T	1	1	0			zgc:92873	sim to C11orf49 | chromosome 11 open reading frame 49	Dr.31375	C11orf49		CU855901.1	25
CATGAGCAAGAAAATGACTGAACACGA	6M T	1	0	1			gb:co360592	expressed sequence CO360592	Dr.120568	C11orf65		AL929225.6	24
CATGTGTATGTTTTGTACCATTCATTT	6M T	1	0	1			si:rp71-1p14.7	sim to C11orf70 chromosome 11 open reading frame 70	Dr.39538	C11orf70		AL627325.6	21
CATGTATTGCTATTGTTATGGTCCCGT	2M T	1	1	0			LOC797701	sim to C15orf40 | chromosome 15 open reading frame 40	Dr.20799	C15orf40		CR847527.7	25
CATGATCTTCAGTCTCACCAGACAGTA	2M T	1	1	0			zgc:111992	weak sim to chromosome 15 open reading frame 43	Dr.85201	C15orf43		BX649429.13	7
CATGCCCAGTCCTTTGGATGCTGGATT	2-6M T	1	1	5			zgc:111992 (LOC566734)	weak sim to chromosome 15 open reading frame 43 or LRRC40	Dr.85201	C15orf43		BX649429.13	7
CATGGCTACCTTCAGACACCAAGGAGG	6M T	1	0	1			zgc:103625	UPF0585 protein C16orf13 homolog B	Dr.114547	C16orf13		CU633777.4	3
CATGCTCTACGTGTAGCAATATATGAA	2-6M T	1	1	1			LOC100150067	very weak sim to C16orf46 chromosome 16 open reading frame 46	Dr.144676	C16orf46		CT573202.5	18
CATGATGACAGTATATAATATTTAACT	2M T	1	1	0			si:ch211-202h22.8	sim to C16orf5 | chromosome 16 open reading frame 5	Dr.79987	C16orf5		BX119918.18	1
CATGGGGCCACTGTCAAACGGATGTAC	2M T	1	1	0			si:dkey-102f14.5	lin-10	Dr.134250	C16orf70		BX908765.9	18
CATGGAGGACCAGGACTCTGTAGGTCC	2M T	1	1	0			Dr.81462	sim to C17orf28 | chromosome 17 open reading frame 28	Dr.81462	C17orf28		ND	3
CATGCTACACAGAATGTACTTTTCGAA	6M T	1	0	1			LOC100001148	uncharacterized protein C17orf90-like	Dr.160348	C17orf90		AL954682.6	12
CATGAAGGACACAGAGGCTAATCTACG	6M T	1	0	1			LOC794803	weak sim to C18orf34 | chromosome 18 open reading frame 34	Dr.157984	C18orf34		BX005079.6	24
CATGTATGTGTGGACCTTGTGCTTCTG	2M T	1	1	0			Dr.124684 (CD284610.1)	very weak sim to C1orf172 | chromosome 1 open reading frame 172	Dr.124684	C1orf172		CU861892.6	19
CATGCAGGAGGTCAAAGGACAGGATAT	6M T	1	0	1			si:dkey-218f9.1	UPF0490 protein C1orf201 homolog	Dr.17660	C1orf201		CR853286.10	19
CATGTGGTCCTCTGCGAGACTTCATAG	2M T	1	1	0			zgc:123238	sim to C1orf43 | chromosome 1 open reading frame 43	Dr.92803	C1orf43		CR381547.15	16
CATGGTCCTCATCATCACTAGCCAGCC	6M T	1	0	1			LOC571902	sim to C1orf51 | chromosome 1 open reading frame 51	Dr.156954	C1orf51		CR391977.5	25
CATGCTGGAAACTAACCGCATTGAATT	2M T	1	1	0			zgc:101851	UPF0538 protein C2orf76 homolog	Dr.108187	C2orf76		CU463316.11	9
CATGTAGCGCTGAGGTTTAATGCTGAA	2M T	1	1	0			LOC797133	sim to C5orf24 | chromosome 5 open reading frame 24	Dr.118060	C5orf24		CU633746.8	14
CATGGAGGAGTTACTGTGAGTCCTGAG	6M T	1	0	1			LOC792625	uncharacterized protein C5orf42-like	Dr.69905	C5orf42		CU424461.7	10
CATGAAATAACTCGGCAGGTAAAGCAT	6M T	1	0	1			zgc:153606	UPF0532 protein C7orf60 homolog	Dr.133307	C7orf60		CR450696.6	25
CATGGCAACAAGAAACAATTGCGTTGT	2M T	1	1	0			si:ch211-233f10.4	C9orf117 homolog	Dr.91565	C9orf117		BX001023.12	5
CATGTTTTCGCTGAAAATCCAACCGAG	2-6M T	1	1	1			zgc:123172	nef-associated protein 1	Dr.91532	C9orf156		BX005000.10	1
CATGGACTACAGGCAAGCATATCAGTA	2M T	1	1	0			LOC799850	C9orf172 homolog	ND	C9orf172		AL929453.8	8
CATGATGAAATTAAAAACATATGAGTT	2-6M T	1	1	1			LOC559789 (si:ch211-222e23.2)	transmembrane protein C9orf91 homolog	Dr.89760	C9orf91		BX537337.9	19
CATGCCAAGCCTCGCCAGTGGCACTCC	2M T	1	1	0			cacna1ba	calcium channel, voltage-dependent, N type, alpha 1B subunit, a	Dr.124365	CACNA1B		BX571772.8	5
CATGTTTGTGTGCGTGTTTCTAAAAGT	2M T	1	1	0			cacna1c	calcium channel, voltage-dependent, L type, alpha 1C	Dr.83683	CACNA1C		BX248410.4	4
CATGTATGACGGAATTATGGCGTACGG	6M T	1	0	1			cacna1da	Calcium channel, voltage-dependent, L type, alpha 1D subunit	Dr.91445	CACNA1D		BX571969.5	11
CATGTCTCCGCTCGGCATCTCCGTCTT	6M T	1	0	1			cacna1db	calcium channel, voltage-dependent, L type, alpha 1D subunit, b	ND	CACNA1D		CU914536.36	8
CATGCTCTCTCCTGCATCCCCCTCATC	6M T	1	0	1			cacna1g	calcium channel, voltage-dependent, T type, alpha 1G subunit	Dr.139278	CACNA1G		CR392361.2	12
CATGCAGCTTTCCCATGGATTTCTAGG	2M T	1	1	0			cacng1	calcium channel, voltage-dependent, gamma subunit 1	Dr.132288	CACNG1		BX324125.5	6
CATGTCGTCTCCGGGTGTCGGGCGCTG	2-6M T	1	1	2			calb1	calbindin 1	Dr.81170	CALB1		CR942305.18	16
CATGTATTGTTGCAGGAATAAGTGGAA	6M T	1	0	1			calcrla	calcitonin receptor-like a	Dr.86963	CALCRL		BX470245.8	9
CATGGCTTTAAAATATGACCGTTTATT	6M T	1	0	1			calhm2	calcium homeostasis modulator 2	Dr.80852	CALHM2		BX530079.19	13
CATGTGAAGAAGGTAAAACAATGAACT	2M T	1	1	0			LOC555945	calcium/calmodulin-dependent protein kinase type 1-like	Dr.94219	CAMK1		BX649498.5	6
CATGTTTAATCTTGTGGAGGACGGCGA	6M T	1	0	1			LOC794026	calcium/calmodulin-dependent protein kinase type 1-like	Dr.67950	CAMK1		BX248331.8	11
CATGTAGGAATGTTTATCTTAACTTCT	2M T	1	3	0			camk4	calcium/calmodulin-dependent protein kinase IV	Dr.81050	CAMK4		BX294395.15	5
CATGAGCAGAAGAAAGAGGAGGCTAGG	6M T	1	0	2		Y	camsap2a	calmodulin regulated spectrin-associated protein family, member 2a	Dr.108349	CAMSAP1L1		BX950190.12	22
CATGTACATTTGATTTGAGATCTTTTT	6M T	1	0	1		N	capn1b	calpain 1, (mu/I) large subunit b	Dr.120194	CAPN1		BX004801.15	22
CATGTGTAACAGAGACCTCCAGCTAGA	6M T	1	0	1			card9	caspase recruitment domain family, member 9	Dr.84556	CARD9		CU856180.13	5
CATGTTTGATGACCTTGCGGACCAGTT	6M T	1	0	1			si:dkey-79f11.1 (LOC555323)	caskin-1-like	Dr.135445	CASKIN1		BX470266.10	1
CATGAAAGAAAGAAGGGGATCAGACGA	2M T	1	1	0			caspxa (zgc:194469)	Caspase Xa	Dr.86735	CASP10		CT009620.9	6
CATGTTTGCGTGTGTGTTGTTGAGTCA	2M T	1	1	0			casp3b	caspase 3, apoptosis-related cysteine protease b	Dr.94264	CASP7		FP102891.8	14
CATGTCCACTGTGCCGTGGTACGCCTC	6M T	1	0	1			casp8l2	caspase 8, apoptosis-related cysteine peptidase, like 2	Dr.72308	CASP8		FP102120.9	9
CATGTTAATCTTCTGTGCTGTGTGGAT	6M T	1	0	1			LOC555916	extracellular calcium-sensing receptor-like	ND	CASR		CR405715.16	18
CATGATGCGACTTTTTGCAAATTGTTA	2M T	1	1	0			si:dkeyp-13d11.1	weak sim to CCDC106 | coiled-coil domain containing 106	Dr.113656	CCDC106		CR749162.13	16
CATGAGGTGCTGGATCTGGACACTGCT	6M T	1	0	1			LOC100004835	weak sim to CCDC18 | coiled-coil domain containing 18	Dr.113824	CCDC18		BX927121.9	2
CATGGTGAATGTCCAAACAGCCAGTGA	6M T	1	0	1			ccdc40	coiled-coil domain containing 40	Dr.25001	CCDC40		BX571728.14	6
CATGAAACGGCAGAGTGACAAAGCCGC	2-6M T	1	1	1			LOC561649	coiled-coil domain-containing protein 50-like	Dr.157911	CCDC50		CR762484.12	11
CATGAACAGCAGTACTCAGAATGTTTA	2-6M T	1	1	2			zgc:153290	coiled-coil domain-containing protein 51	Dr.6242	CCDC51		CU570773.6	22
CATGACGTACCTCAGTCTGGTGGAGCA	6M T	1	0	1			zgc:101737	very weak sim to CCDC63 | coiled-coil domain containing 63	Dr.91295	CCDC63		AL954137.19	11
CATGTCAACCAGACAGAGATGAACCTG	2M T	1	1	0			LOC796628	coiled-coil domain containing 66-like	Dr.83710	CCDC66		NW_001878371.3	22
CATGTTTATGACCTTCTGGACCCACTC	2M T	1	1	0			LOC797669	c-C motif chemokine 2-like	Dr.112407	CCL11		CR450808.5	25
CATGAAGCAGATGACAGAGGCTGGCTC	6M T	1	0	2			si:dkey-217m5.3	weak sim to CCL14 | chemokine (C-C motif) ligand 14	Dr.140221	CCL14		AL845306.9	20
CATGTACACAGACAACTCCATTACATC	2-6M T	1	1	1			ccnd2b	cyclin D2, b	Dr.103497	CCND2		CR751235.5	4
CATGTGAAAAATATGACAAACCTCTGC	6M T	1	0	1			LOC100329837	c-C chemokine receptor type 1-like	ND	CCR1		NW_003335487.1	16
CATGACGATGTTGTATGGAGTCCAGAA	2-6M T	1	1	2			LOC100004988	c-C chemokine receptor type 2-like	ND	CCR4		BX537113.8	16
CATGACAATGTTGTATGGAGTCCAGAA	2M T	1	1	0			LOC100005081	c-C chemokine receptor type 5-like	ND	CCR4		BX537113.8	16
CATGGTCAGTTGCACTACTGAAATATA	2M T	1	1	0			LOC100332134	CD109 antigen-like	Dr.119372	CD109		NW_003051685.2	20
CATGAAACACATAGCGGTGTGAAAGGA	2-6M T	1	1	1			LOC100002334	very weak sim to CD200 | CD200 molecule	Dr.23240	CD200		CR786582.5	1
CATGAGTTCATCTGATCCATCACTGCT	6M T	1	0	1			LOC100003869	b-cell receptor CD22-like	Dr.140036	CD22		BX284640.7	1
CATGATCTGATGTCCATTAGGGTATTT	2M T	1	1	0			LOC100149932	b-cell receptor CD22-like	ND	CD22		BX927068.14	1
CATGGAGAGAAAATCTCTGATCCTGTG	2M T	1	18	0			LOC100150177	b-cell receptor CD22-like	ND	CD22		BX927068.14	1
CATGTCTTTGTTCTTGAAGTGATGAAC	2-6M T	1	1	1			LOC100150847	b-cell receptor CD22-like	ND	CD22		CR790369.7	1
CATGGAGAGAAATACTCTGATCCTGCT	2M T	1	1	0			LOC100150855	b-cell receptor CD22-like	ND	CD22		BX927068.14	1
CATGGACACACACTCACATCACCTGAA	2M T	1	2	0			LOC100151328	sialoadhesin-like	ND	CD22		NW_001878084.3	1
CATGAAGGATGGAGTTAAACGTCTCGC	6M T	1	0	1			LOC793843	very weak sim to CD22 | CD22 molecule	Dr.118378	CD22		AL929032.10	22
CATGAGATGATGAACAAACCAGTATTT	2-6M T	1	1	3			LOC100004255 (LOC100534732)	very weak sim to CD244 | CD244 molecule, natural killer cell receptor 2B4	ND	CD244		CR352226.16	22
CATGATCAGCAGAAGCAACAACTTCAA	6M T	1	0	2			LOC100001329	weak sim to CD58 | CD58 molecule	Dr.120041	CD58		BX005329.9	22
CATGTCATTGGGCTTTTTTGGATGTCT	6M T	1	0	1			zgc:171713	weak sim to CD82 | CD82 molecule	Dr.94329	CD82		AL732488.7	12
CATGTGCCGAGGACACTGTGGAGTATG	2M T	1	1	0			LOC100002776	very weak sim to CD48 | CD48 molecule	Dr.120046	CD84		BX004840.8	22
CATGATCAACATCATCTCGGCTGAAGA	2M T	1	1	0			LOC567759	cubilin-like	Dr.135819	CDCP2		CR450845.14	2
CATGGGATATTTGACAAACACATATCA	6M T	1	0	1			si:dkey-30c15.12	sim to CDH1 cadherin 1, type 1, E-cadherin (epithelial)	Dr.112410	CDH1		BX470218.10	18
CATGCAGCACGGCCAGGACCAGGGGCC	6M T	1	0	1			cdk19	cyclin-dependent kinase 19	Dr.158845	CDK19		BX248523.8	20
CATGTAAATGACAACAGCAATAATAAC	6M T	1	0	1			cdkl1	cyclin-dependent kinase-like 1 (CDC2-related kinase)	Dr.106937	CDKL1		BX936452.24	13
CATGGAGCAATAGGAGGAAGTGTGAGA	2-6M T	1	1	2			LOC100149727	carcinoembryonic antigen-related cell adhesion molecule 5-like	Dr.140129	CEACAM1		CR388405.10	16
CATGGAGAGAAATACTCTGATCCTGTC	2-6M T	1	12	10			LOC793718	b-cell receptor CD22-like	ND	CEACAM1		BX908759.27	1
CATGTCTTTGTGATTCTCTTCTGTTTG	2M T	1	1	0			LOC799170	carcinoembryonic antigen-related cell adhesion molecule 5-like	Dr.156980	CEACAM1		BX571826.20	16
CATGCACCGATGGAAGTTGAGACGATC	6M T	1	0	1			LOC100006875	very weak sim to CEACAM18 carcinoembryonic antigen-related cell adhesion molecule 18	ND	CEACAM18		AL929276.7	22
CATGTAGAATGGAGGTTTGAACATATG	2M T	1	1	0			LOC100006764	weak sim to CEACAM20 carcinoembryonic antigen-related cell adhesion molecule 20	ND	CEACAM20		BX511034.11	22
CATGTAAAAGATCAACTGAGGAATCAG	2-6M T	1	1	1			si:dkeyp-117h8.1	centrosomal protein of 135 kDa	Dr.85584	CEP135		CR352243.7	20
CATGGCGGATCCTGCAATGGGGATTCA	6M T	1	0	1			si:dkey-78l4.4	weak sim to CFD | complement factor D (adipsin)	ND	CFD		BX936298.17	22
CATGCTGTCTTGAAGACTGTGTCCTGA	2M T	1	1	0			cgrrf1	cell growth regulator with ring finger domain 1	Dr.87118	CGRRF1		AL954679.7	20
CATGTATAATGCAATGTAAACACTCTA	2M T	1	3	0			chad	chondroadherin	Dr.80402	CHAD		BX530026.5	12
CATGATGGTGCTCTACTGGCAGGTTTC	6M T	1	0	1			chrm2a	cholinergic receptor, muscarinic 2a	Dr.88792	CHRM2		CR356243.16	4
CATGGAAATTAAGTGATGTTTAATGTC	2M T	1	1	0			chrna4	cholinergic receptor, nicotinic, alpha 4	Dr.103932	CHRNA4		BX511174.4	11
CATGTGACAGCAACAAGGTGTAAATGA	2M T	1	2	0			si:ch211-95j8.2	weak sim to claudin 23	Dr.80149	CLDN23		CT027832.10	10
CATGATTCCACCTCAGAGAGTGAATTA	2-6M T	1	4	4			cldn17	claudin 17	Dr.82248	CLDN8		NW_003040316.1	15
CATGTGGACGGTGAAGACTGCGCTAGT	2M T	1	1	0			illr3	immune-related, lectin-like receptor 3	Dr.90350	CLEC4E		AL928975.10	19
CATGCAAGAAATGGAAATGAAGCTGCA	6M T	1	0	1			clip1	CAP-GLY domain containing linker protein 1	Dr.124363	CLIP1		NW_003334895.1	10
CATGGGCAACTTCCAGTACTGAGAGTT	2M T	1	1	0			cln5	ceroid-lipofuscinosis, neuronal 5	Dr.91011	CLN5		CT573248.10	9
CATGTGGTGGGTGTGTTTGAATCACTG	2M T	1	1	0			cln8	ceroid-lipofuscinosis, neuronal 8	Dr.118729	CLN8		AL928723.5	17
CATGTCCACACATACACAGGCATTTTA	6M T	1	0	1			clrn1	clarin 1	Dr.89860	CLRN1		NW_003335344.1	15
CATGAACATTCTACGTTTTAAGACAAA	2-6M T	1	1	1			cmklr1	chemokine-like receptor 1	Dr.90264	CMKLR1		BX510312.7	5
CATGAAAGAGACAGCAAGGACAACGAA	2M T	1	1	0			LOC100535542	sim to CNBP | CCHC-type zinc finger, nucleic acid binding protein	ND	CNBP		CR759843.7	4
CATGGAGGACGTTATAGAAAATAAGCG	6M T	1	0	1			LOC572249	cyclic nucleotide-gated channel rod photoreceptor subunit alpha-like	Dr.82628	CNGA1		CR318612.25	23
CATGACTGAGAACGAGGAGAGAGCTAT	2-6M T	1	1	1			si:dkey-196h17.4	very weak sim to CNGA2 | cyclic nucleotide gated channel alpha 2	Dr.89854	CNGA2		CR626878.14	13
CATGCAAACTTCACACAGAAACAGAAA	6M T	1	0	1			cnksr2	connector enhancer of kinase suppressor of Ras 2	Dr.89322	CNKSR2		BX571698.15	24
CATGAGATTTCACTTCATATAAGAATT	2-6M T	1	9	4			zgc:172109	very weak sim to CNN1 | calponin 1, basic, smooth muscle	Dr.115589	CNN1		CT573481.4	7
CATGGTACTAAAATCCAGTACGGCAGT	6M T	1	0	1			LOC100329721	metal transporter CNNM3-like	ND	CNNM3		NW_001877079.3	11
CATGGAACTGAGAATCGTCCAAAGCTG	2M T	1	1	0			LOC100150651	sim to human and mouse cyclin M4 (CNNM4)	ND	CNNM4		CU024871.12	5
CATGGCTGTGGTGCTCCGTCACAATGG	6M T	1	0	1			LOC559157	contactin-associated protein-like 2-like	Dr.16289	CNTNAP2		AL929261.27	24
CATGACCCAGACCCCATTAACCTGCTC	2M T	1	1	0			cntnap5	contactin associated protein-like 5	Dr.124483	CNTNAP5		CU019552.6	11
CATGGACATCGCTCCAATGGACATCGG	6M T	1	0	1			col2a1a	collagen type II, alpha-1a	Dr.75057	COL1A2		BX927144.24	8
CATGTTGGCCTGCTCGACCTCTGGATC	6M T	1	0	1			si:dkey-61l1.4	weak sim to COL24A1 | collagen, type XXIV, alpha 1	Dr.120751	COL24A1		BX571772.8	5
CATGTAAAGCAGCACCAAGGGCCTCAT	6M T	1	0	1			col27a1b	collagen, type XXVII, alpha 1b	Dr.115130	COL27A1		CR931814.13	5
CATGTTTTTATCTGAAATAAAATATAG	2-6M T	1	1	1			colec12	collectin sub-family member 12	Dr.75423	COLEC12		BX927088.11	2
CATGAGGGCATCAGGCCGATGAGAGCC	6M T	1	0	1			coro6	coronin 6	Dr.12674	CORO6		CU929119.3	11
CATGGCAAAGAGAAAATAAATCAGTAA	6M T	1	0	5			LOC100002384	cytochrome c oxidase subunit 5B, mitochondrial-like	Dr.103593	COX5B		NW_003039796.1	8
CATGGATTATGTGCGCAGGAGTGTGCT	6M T	1	0	2			cpamd8	C3 and PZP-like, alpha-2-macroglobulin domain containing 8	Dr.76582	CPAMD8		CU463178.10	22
CATGTTGTTGCTGTTGTCAGTTCTGAA	2M T	1	1	0			cpeb3	cytoplasmic polyadenylation element binding protein 3	Dr.158889	CPEB3		BX530089.9	13
CATGTTCAAGAAGTAACAGCACAAAGC	2M T	1	1	0			cplx2	complexin 2	Dr.110849	CPLX2		BX511257.16	14
CATGTCGGCGCACAGTACCACTAGGCT	6M T	1	0	1			crb2b	crumbs homolog 2b	Dr.93336	CRB1		CU695136.9	8
CATGCAGAAAGAGTCTCAAGGTTACCT	6M T	1	0	1			LOC565910	cyclic AMP-responsive element-binding protein 5-like	Dr.118492	CREB5		BX571682.13	16
CATGGAAAGTACACATTGAAGAAATCC	6M T	1	0	1			crebrf	creb3 regulatory factor	Dr.87858	CREBRF		NW_003040746.2	21
CATGGACGATTTAGGAAAATGAAGCAT	2M T	1	1	0			LOC796284	sim to to corticotropin releasing hormone (crh)	Dr.87973	CRH		CT574558.4	2
CATGGACAAAGAAAGTCAAAAGCAGAT	2-6M T	1	1	1			zgc:153637	sim to CRTC1 | CREB regulated transcription coactivator 1	Dr.87563	CRTC2		CR356234.11	2
CATGGCTGTGCGCTGAACATTGCTTAT	2-6M T	1	1	1			cryabb	crystallin, alpha B, b	Dr.80498	CRYAB		BX510931.8	5
CATGGTAGGACAGGTTTCCGCTGTAGG	6M T	1	0	1			cryba1l	crystallin, beta A1, like	Dr.75114	CRYBA1		CU694367.4	14
CATGCCCCTTTCTGCCCAATGCTAAAT	2M T	1	1	0			cryba4	crystallin, beta A4	Dr.75113	CRYBA4		NW_001877080.3	10
CATGTTTTGGAAAAATAAAAAAAAAAA	2M T	1	6	0			crybb1	crystallin, beta B1	Dr.84900	CRYBB1		CR384089.24	10
CATGTCTCTCACTCTGCGAACAGACTG	2M T	1	1	0			crybb1l3	crystallin, beta B1, like 3	Dr.118296	CRYBB1		BX663513.13	8
CATGCAGTATCACCCTCGTGGAGCCTT	2M T	1	1	0			crybb2	crystallin, beta B2	Dr.93327	CRYBB2		CR847549.21	8
CATGAGGCGTATCAATGATTCCTTCTA	6M T	1	0	1			crygm2a	crystallin, gamma M2a	Dr.93408	CRYGB		CR391987.5	9
CATGCCTGTGCTGAATTAATAAACGTG	2-6M T	1	3	1			crygs1	crystallin, gamma S1	Dr.118493	CRYGS		CU041376.9	22
CATGCCAAGGTGAGAGTGAGACGCCTC	6M T	1	0	1			LOC560826	chondroitin sulfate N-acetylgalactosaminyltransferase 2	Dr.77748	CSGALNACT2		BX005252.15	13
CATGGGTGCCAGATGCCAATACTCCTT	2M T	1	1	0			LOC100332045	CUB and sushi domain-containing protein 1-like	Dr.86421	CSMD1		CU861458.10	UN
CATGTGGACTCGGGGGCATCTGCCATC	6M T	1	0	1			csnk1g1	casein kinase 1, gamma 1	Dr.79333	CSNK1G1		AL935050.11	7
CATGTATTGGTCAAGATCAAGTCAGCG	6M T	1	0	1			LOC563583	sim to CTAGE5 | cutaneous T-cell lymphoma-associated antigen 5 family, member 5	Dr.88168	CTAGE5		AL954682.6	12
CATGAAAAAAAAAAAAAAAAAACATGA	6M T	1	0	1			si:dkeyp-74c5.1	weak sim to CTRC | chymotrypsin C (caldecrin)	Dr.112825	CTRC		BX284682.7	22
CATGGGTGTGCGAGAGCTCTGGTGAAC	6M T	1	0	1			cttnbp2	cortactin binding protein 2	Dr.81174	CTTNBP2		BX569797.4	18
CATGAACCTTCTGAGCTTGATTTTCCC	2M T	1	1	0			LOC100004625	c-C chemokine receptor type 2-like	Dr.118421	CX3CR1		BX511173.7	16
CATGCAGCCGAAGACCTGAAAACACCC	2M T	1	1	0			cxcl-c1c	chemokine (C-X-C motif) ligand C1c	Dr.113696	CXCL11		CU075733.20	1
CATGGAGGTCATTGCCACTGTGAAAAA	2M T	1	1	0			cxcl-c13d	chemokine (C-X-C motif) ligand C13d	Dr.82552	CXCL2		NW_001879238.3	7
CATGGAGTTCAGAAGTTATCTCGTAAA	2M T	1	1	0			LOC799527	sim to chemokine (C-X-C motif) receptor 3.1	Dr.79952	CXCR3		BX005342.14	16
CATGAAGGAGGATTTACACACTCGGCT	2M T	1	1	0			LOC796876	sim to CXorf21 | chromosome X open reading frame 21	Dr.116463	CXorf21		BX530033.6	9
CATGTCGAGGTGGAGAACGTGAAGTGT	2M T	1	1	0			LOC566084	weak sim to CXorf38 | chromosome X open reading frame 38	Dr.158261	CXorf38		CR354392.12	25
CATGAAGAGGAGGAGGAAGAAGAGCAG	2M T	1	1	0			si:ch211-26b3.2	weak sim to CXorf57 | chromosome X open reading frame 57	Dr.151941	CXorf57		CU464080.7	5
CATGTGGATGGAGAAACTGGGCTGAAG	2-6M T	1	1	1			LOC797675	cXorf58 protein-like	Dr.49116	CXorf58		CU914615.3	5
CATGATACAGCAGAAGATATGAAACAA	2M T	1	1	0			LOC570432	weak sim to sim to CXorf65 | chromosome X open reading frame 65	Dr.15633	CXorf65		BX530080.5	14
CATGGAGGGAAGTCGAGCCGTGGAGGA	2-6M T	1	1	2			LOC560916	CXXC-type zinc finger protein 5-like	Dr.160165	CXXC5		FP102779.8	14
CATGTGGCGAGACTGGAGGTTCGTCTC	6M T	1	0	1			cyfip2	cytoplasmic FMR1 interacting protein 2	Dr.83830	CYFIP2		FP016207.8	14
CATGTTTCCTTGGCTTCGTCCGTTTGT	2M T	1	4	0			LOC100001426	cytochrome P450 2K1-like	Dr.121104	CYP2C19		CU855818.7	3
CATGAGGTCCTCAGGAGAGCAAACCTT	2-6M T	1	1	3			cyp2ad6	cytochrome P450, family 2, subfamily AD, polypeptide 6	Dr.119557	CYP2J2		BX322665.5	20
CATGGAATTAGGGAGAAATCCAGAGAT	2-6M T	1	1	1			LOC100329425	cholesterol 24-hydroxylase-like	Dr.77544	CYP46A1		NW_001878114.3	20
CATGTTTTTACTCGACCTCCCAGCTTG	2M T	1	1	0			cyth2	cytohesin 2	Dr.87265	CYTH2		CR848788.7	16
CATGTTTATTAAAATAATATCCTGGCA	2M T	1	3	0			LOC100330779	weak sim to CYTL1 | cytokine-like 1	Dr.37777	CYTL1		NW_003335942.1	21
CATGTGCTGCACCAGAGCAAAAGACAC	2-6M T	1	2	1			dagla	diacylglycerol lipase, alpha	Dr.74658	DAGLA		CT030046.11	7
CATGAACTATGAGTTTGATGATGAATT	2M T	1	4	0			dapk2	death-associated protein kinase 2	Dr.22225	DAPK3		CR352249.24	7
CATGAAAGATAAAAGCACAAATCAGTC	6M T	1	0	1			dazap1	DAZ associated protein 1	Dr.81198	DAZAP1		BX255969.8	11
CATGTCCAGCAGAAACATCGAGTGGGA	6M T	1	0	1			dclk2	doublecortin-like kinase 2	Dr.85306	DCLK2		BX005385.13	1
CATGACCGGCTGGGATCCTGTGCGCTT	6M T	1	0	1			LOC562868	phospholipase DDHD1-like	Dr.87988	DDHD1		AL928709.36	17
CATGAGAGGCTTCCTTGAGATGGCAGT	2M T	1	1	0			dennd1b	DENN/MADD domain containing 1B	ND	DENND1B		CU137679.4	22
CATGGCCTCTGATTCCTCTAAGTTTTC	6M T	1	0	1			dgkd	diacylglycerol kinase, delta 130kDa	ND	DGKD		NW_003335387.1	15
CATGCTTTACCACAGTACAGAACAAAC	6M T	1	0	1			dgke	diacylglycerol kinase epsilon	Dr.115465	DGKE		BX571728.14	6
CATGTGATCAATCTCAGCCAATCACAG	6M T	1	0	1			flj13639	short chain dehydrogenase/reductase	Dr.81111	DHRS12		NW_001877894.2	15
CATGAGTTTGTGTTCGGCTGACTGTAC	2-6M T	1	2	7			LOC100334658	leukemia-associated protein 7-like	Dr.79656	DLEU7		CU986305.4	1
CATGTATGACCACCTGTAAGAAGATCG	2M T	1	1	0			dlgap4	discs, large (Drosophila) homolog-associated protein 4	Dr.82814	DLGAP4		CU683893.8	6
CATGTGTCTAATGTGACTTTCAGCATT	6M T	1	0	1			LOC100147938	sim to DMBT1 | deleted in malignant brain tumors 1	ND	DMBT1		CT583642.8	3
CATGGTAGTTGAAGATGCACTTTCGAG	2-6M T	1	1	2			LOC100537565	dynein heavy chain 6, axonemal-like	Dr.106982	DNAH6		NW_003336423.1	UN
CATGCATTGAATTCAACCCTGTCCATC	6M T	1	0	1			dnai1	dynein, axonemal, intermediate polypeptide 1	Dr.108230	DNAI1		CR450799.4	21
CATGTATAACAGCATAGCCAGCTCTGG	6M T	1	0	1			zgc:158666	dynein intermediate chain 1, axonemal	Dr.91820	DNAI1		CR812470.8	21
CATGCTTACTGAGGCATCAAAGGCTGG	2M T	1	1	0			LOC100329402	dnaJ homolog subfamily C member 11-like	ND	DNAJC11		NW_003336596.1	UN
CATGCAGATCGACACAGATGAGGATGA	6M T	1	0	3			dnajc16	DnaJ (Hsp40) homolog, subfamily C, member 16	ND	DNAJC16		AL954146.8	23
CATGTGGGGATAGCTCACCCAAAAATA	2M T	1	1	0			LOC565734	sim to DNAJC30 | DnaJ (Hsp40) homolog, subfamily C, member 30	Dr.84844	DNAJC30		CR382327.27	15
CATGCTGTTTGTAAATAACAGATATTA	2M T	1	1	0			dnajc5b	DnaJ (Hsp40) homolog, subfamily C, member 5 beta	Dr.37718	DNAJC5		CU929346.4	24
CATGAACTGTAAAATGATACATATCTG	2-6M T	1	2	1			dnase1l3l	deoxyribonuclease I-like 3, like	Dr.90408	DNASE1L3		CR847543.13	8
CATGGTGAGGTGTTAGTGGCAGTCAGG	6M T	1	0	1			si:dkey-98p3.2	dermatopontin	Dr.115313	DPT		BX537106.6	6
CATGGCTCGAATGCTGAGCAAGGAGCT	6M T	1	0	1			dpyda	dihydropyrimidine dehydrogenase a	Dr.19758	DPYD		CT955999.15	24
CATGTCCAGTCCTGCCAAAGCTGCAAT	2M T	1	1	0			LOC100002285	sim to dopamine D1C receptor	Dr.143359	DRD5		BX323062.10	5
CATGCTGGTGTTGAGTGTAAAATCCAA	6M T	1	0	1			zgc:163052	sim to DTX4 | deltex homolog 4	Dr.92635	DTX4		BX511019.6	1
CATGGGGCAACTTTTAGAGTTCGAGGA	2M T	1	1	0			si:ch211-180b22.4	sim to DUSP10 dual specificity phosphatase 10	Dr.150023	DUSP10		AL935035.6	20
CATGTCTGTCTTCCCCATTGTAAGAGG	6M T	1	0	1			dvl1b	dishevelled, dsh homolog 1b	Dr.139719	DVL1		BX001056.6	11
CATGTGACTGATGGCAGAGGCTGCGG	2M T	1	1	0			lepa	leptin a [Source:ZFIN;Acc:ZDB-GENE-081001-1]	Dr.148389.	LEP		BX927136	18
CATGCTCTCCTGAGGCTGTGAGAGCAT	6M T	1	0	1			LOC798868	cytoplasmic dynein 1 intermediate chain 1-like	ND	DYNC1I1		NW_003337013.1	19
CATGAGAGCACAAGGGAGCGTAAAGAG	2M T	1	1	0			dync2li1	dynein, cytoplasmic 2, light intermediate chain 1	Dr.117470	DYNC2LI1		AL928999.4	13
CATGGTGGCTCCAGATAAAGAATACCT	6M T	1	0	2			LOC100001191	dynein light chain roadblock-type 2-like	Dr.92346	DYNLRB2		CR450696.6	25
CATGAACACTTTCATTTTATTGACTGA	2M T	1	1	0			ebf3	early B-cell factor 3	Dr.86727	EBF3		AL954339.10	12
CATGCAGGACAATCGAGATTCTGCCAG	2M T	1	1	0			si:dkey-32e6.6	sim to ECM2 | extracellular matrix protein 2, female organ and adipocyte specific	Dr.103519	ECM2		AL953864.6	23
CATGGACGCCAAAGAGAGAGGGGCCCT	6M T	1	0	1			LOC100534738	EH domain-binding protein 1-like protein 1-like	Dr.156855	EHBP1L1		AL954709.15	7
CATGAACTGAATGACTGGCTGTGCTTT	2M T	1	1	0			eif2c1	eukaryotic translation initiation factor 2C, 1	Dr.55069	EIF2C3		NW_001877700.3	16
CATGTGTTACATAACAGCCAAACGCAA	6M T	1	0	1			elk1	ELK1, member of ETS oncogene family	Dr.85916	ELK1		CR356245.25	8
CATGGCTGGTAATCAGGCTTCACGTAA	2M T	1	1	0			emilin1b	elastin microfibril interfacer 1b	Dr.118802	EMILIN1		AL954324.11	17
CATGTTATGGGTGTGTGGCTGGAGGGG	6M T	1	0	1			eml3	echinoderm microtubule associated protein like 3	Dr.132982	EML3		CU457795.7	7
CATGAGCCGTCGTCACCCATTCTGAAT	2M T	1	1	0			wu:fb77g05	sim to EML5 | echinoderm microtubule associated protein like 5	Dr.77290	EML5		CR759765.6	17
CATGTTCAAAACCAGAGGAGTCTGGTT	6M T	1	0	1			zgc:110053	poly(U)-specific endoribonuclease-B	Dr.91933	ENDOU		CU459208.9	21
CATGACATTAAAAACTCACATCAAAAA	6M T	1	0	1			zgc:153973	enolase-like protein ENO4	Dr.150750	ENO4		CU633972.8	17
CATGATGACCAGAGACTGAGAAAACAC	2M T	1	1	0			LOC100536156	ectonucleotide pyrophosphatase/phosphodiesterase family member 1-like	Dr.125077	ENPP1		NW_003335726.1	19
CATGCATTCCTCAAGGCTACGTGCTGC	2M T	1	1	0			entpd2a.2	ectonucleoside triphosphate diphosphohydrolase 2 a.2	Dr.114921	ENTPD2		BX510370.5	5
CATGGGTAGCCCCTCTCTCACCGAGCA	2M T	1	1	0			epd	ependymin	Dr.268	EPDR1		AL935065.7	5
CATGGTGTTTCTGGCCAAAGAGGATCT	6M T	1	0	1			epg5	ectopic P granules protein 5 homolog	Dr.115048	EPG5		CR753867.11	5
CATGCACATCAGAGCTTCGTAGGAGAG	2-6M T	1	1	2			epha4b	eph receptor A4b	Dr.105697	EPHA4		CR931819.25	2
CATGAGCAGTATACAGACTATGAGAGC	2-6M T	1	3	2			epha7	eph receptor A7	Dr.67757	EPHA7		AL935049.19	20
CATGAACTACGTCCATCGTGACCTGGC	6M T	1	0	1			ephb3a	eph receptor B3a	Dr.28327	EPHB3		CT583648.23	2
CATGCGTCGTCCCTGGCCTCGTCTGGC	6M T	1	0	1			erc1a	ELKS/RAB6-interacting/CAST family member 1a	Dr.152805	ERC1		CR513783.5	25
CATGAAGGCCAAGCTGTCGTCCACTCA	2M T	1	1	0			erc1b	ELKS/RAB6-interacting/CAST family member 1b	Dr.157040	ERC1		BX323869.7	4
CATGGTCTGCTCCAGCAGGGACACCGG	2M T	1	1	0		N	ern2	endoplasmic reticulum to nucleus signaling 2	Dr.113430	ERN1		BX004779.16	1
CATGTTCGATTTATCGACTATGAATAC	6M T	1	0	1			etnk2	ethanolamine kinase 2	Dr.117033	ETNK1		AL929022.7	11
CATGACACTTTCTCGAGACCCTCCTCA	6M T	1	0	1			LOC100537109	weak sim to EVA1C | eva-1 homolog C	Dr.87758	EVA1C		FP016208.12	14
CATGTTCAAGAAGAAGGAATACAGCCC	2M T	1	2	0			LOC100536006	envoplakin-like	Dr.141203	EVPL		NW_003336321.1	UN
CATGAACAAACAAGTACCACAAATTCA	2M T	1	1	0			fa2h	fatty acid 2-hydroxylase	Dr.86804	FA2H		CR381560.8	25
CATGAGACTGAAAACAAGTAAAATCTC	2M T	1	1	0			fam125ba	family with sequence similarity 125, member B, duplicate a	Dr.151157	FAM125B		CU896585.2	5
CATGCTGGACAACCTCAGGCATCTACT	6M T	1	0	1			LOC797114	protein FAM13A-like	Dr.143117	FAM13A		AL954729.6	6
CATGATGTTGAGTCAGCGTAGAGTCCT	6M T	1	0	1			fam160a1	family with sequence similarity 160, member A1	Dr.96260	FAM160A1		CT573492.13	1
CATGTCTGCCGGCACTTTGCTGACCAC	2M T	1	1	0			fam168a	family with sequence similarity 168, member A	Dr.76527	FAM168A		NW_003335668.1	18
CATGTTGTTTCGGAGGGATCAGGCTTC	6M T	1	0	1			fam176ba	family with sequence similarity 176, member Ba	Dr.35147	FAM176B		BX321921.11	16
CATGAGACTTGAAGACCTGCTCAAGTG	6M T	1	0	2			fam65b	family with sequence similarity 65, member B	Dr.86593	FAM65B		BX957279.13	19
CATGACTGTGGCTGAGATACCTGTGTT	2-6M T	1	2	2			fam73b	family with sequence similarity 73, member B	Dr.38403	FAM73B		NW_001878270.3	21
CATGATTAATCCAGTGTATACCTGATC	2M T	1	1	0			fam78a	family with sequence similarity 78, member A	Dr.88485	FAM78A		NW_003334430.1	5
CATGTGTCAGATGTCGTCCAGCAGTCG	2M T	1	1	0			fbn2a (fbn2)	fibrillin 2a	Dr.120462	FBN2		CT027815.11	10
CATGGAGAACGGAGAAGAGCGAGGGGA	2-6M T	1	1	1			LOC795023	f-box/LRR-repeat protein 17-like	Dr.156499	FBXL17		CU929327.18	8
CATGGAGGAGGTGCTCATCCCAGACAA	6M T	1	0	1			fbxl3b	F-box and leucine-rich repeat protein 3b	Dr.36830	FBXL3		NW_003334509.1	6
CATGGATCAACTGCAACCTGACATTAA	2-6M T	1	1	1			si:dkey-147f3.4	weak sim to FBXO44 F-box protein 44	Dr.133920	FBXO44		CR356239.11	23
CATGATCGTGCCTACAGTTTTCCTGCA	2-6M T	1	3	1			si:ch73-142c19.1	weak sim to FBXW12 | F-box and WD repeat domain containing 12	Dr.120318	FBXW12		CU571072.5	23
CATGAAACGGACACATACGAGACCATC	6M T	1	0	1			fcer1g	Fc receptor, IgE, high affinity I, gamma polypeptide	Dr.122775	FCER1G		CT583661.13	7
CATGTACATTTTATTTTCAGTTGAATG	2M T	1	2	0			wu:fc51c12	sim to FCF1 | FCF1 small subunit (SSU) processome component homolog	Dr.76205	FCF1		NW_001877808.3	17
CATGAGGGTTTCTACCACTGTAAACAC	6M T	1	0	2			LOC100334534	Fc receptor-like protein 5-like	ND	FCRL5		BX511176.6	3
CATGGGCATTTGCAAAGTCCTGAACAT	2M T	1	1	0			im:7154036	sim to FERMT3 | fermitin family member 3	Dr.115131	FERMT3		NW_003039525.2	5
CATGGGAAAGGCATCTTAAATCTCATA	2M T	1	1	0			si:ch211-57i17.1	fasciculation and elongation protein zeta-2	Dr.87624	FEZ2		BX004824.9	20
CATGCGGCAAAGGTTTCTGCAGGAACT	6M T	1	0	1			fezf1	FEZ family zinc finger 1	Dr.78747	FEZF1		CR752641.12	25
CATGAAATGGCACTTACCGCAGACCCT	2M T	1	1	12			LOC100333904	free fatty acid receptor 3-like	ND	FFAR3		CU855686.17	16
CATGTGTGTATTCTCGTTTGTCCTCAT	6M T	1	0	1			fgd	Faciogenital dysplasia	Dr.81271	FGD3		NW_003334736.1	8
CATGCCTCCCTAAACACCACCACAGCA	6M T	1	0	1			fgfr3	Fibroblast growth factor receptor 3	Dr.107358	FGFR3		CR556722.7	13
CATGTGTACAGTCAGCAGGAAGTGCGT	6M T	1	0	1			fig4	FIG4 homolog	Dr.43643	FIG4		NW_003336941.1	20
CATGGAGCAAGATGAGGAAAGTGAGGA	6M T	1	0	1			LOC568650	sim to FLJ22184 | putative uncharacterized protein FLJ22184 (partial)	Dr.65565	FLJ22184		BX284638.16	3
CATGCAGCAGGCCGATGACTGGCTCGG	2M T	1	1	0			flnca	filamin C, gamma a (actin binding protein 280)	Dr.44099	FLNC		CU302436.11	25
CATGTGAAGACCTAGAAGTATCGGTAT	2M T	1	1	0			flrt2	fibronectin leucine rich transmembrane protein 2	Dr.141690	FLRT2		CR759797.14	20
CATGCAGGGGTCAGCGAATTCTGGACT	2M T	1	1	0			flt4	fms-related tyrosine kinase 4	Dr.81298	FLT4		CR627495.19	14
CATGAGCTGCAGTTGGGGGACGGAGCT	2M T	1	1	0			LOC558990	formin-binding protein 1	Dr.42142	FNBP1		CR361566.16	8
CATGAAGAGGACGGTTTCTGAGACCAG	6M T	1	0	1			LOC562049	formin-binding protein 1-like	Dr.157176	FNBP1		AL928952.15	21
CATGGCTATGCATTCGCTGGCACAGAC	2M T	1	1	0			fndc3a	fibronectin type III domain containing 3A	Dr.74614	FNDC3A		NW_003335337.1	15
CATGAAAACTATATTCAACTTCGGCCC	6M T	1	0	1			fosb	FBJ murine osteosarcoma viral oncogene homolog B	Dr.160161	FOSB		BX248121.9	18
CATGAACCAACTTTCCCCTCACAGCAG	6M T	1	0	1			fosl1	FOS-like antigen 1	Dr.84030	FOSL1		CR626869.7	14
CATGCCTGCCGACGACATCCAGGACGA	6M T	1	0	3			foxj3	forkhead box J3	Dr.116977	FOXJ3		BX005343.18	11
CATGAACAATGCTATATACAGTAAATA	2M T	1	1	0			foxn3	forkhead box N3	Dr.135032	FOXN3		BX927196.10	17
CATGACAGCAAAGAGTCTATTCTGAAG	6M T	1	0	1			foxq1b	Forkhead box Q1b	Dr.25810	FOXQ1		BX510653.9	20
CATGCGTGGTTTGATCGGAGACTTGTC	6M T	1	0	1			slc12a1	Na/K/Cl cotransporter; FERM domain-containing protein 4A	Dr.119061	FRMD4A		BX248392.16	18
CATGAAAGCTGGCACAACAGGTTGTGT	2M T	1	1	0			fsd1l	fibronectin type III and SPRY domain containing 1-like	Dr.52133	FSD1		CU571335.5	5
CATGATCTCCAGAGCAGGGAGGACAGC	2-6M T	1	1	1			zgc:172145	veak sim to FTH1 | ferritin, heavy polypeptide 1	Dr.120840	FTH1		BX004812.8	25
CATGAAAAGCAGCGTGCAGGCCTTATT	2M T	1	1	0			fzd3b	frizzled homolog 3b	Dr.74731	FZD3		CU462878.9	17
CATGGTGTTCTGGAGGGCCTGCGTCTT	6M T	1	0	1			gab2	GRB2-associated binding protein 2	Dr.118214	GAB2		CR936974.20	15
CATGAGGAGAAAGTGCTGGAGAGGGCT	2M T	1	1	0			si:ch73-92i20.1	sim to GAB3 | GRB2-associated binding protein 3	Dr.114888	GAB3		CU137718.6	5
CATGAACCGCAGGCGACTGCAACACGC	6M T	1	0	1			LOC556126	galactose-3-O-sulfotransferase 2-like	Dr.94278	GAL3ST2		BX571794.22	15
CATGAAGGGAAACCAGATGTTTGAATA	6M T	1	0	1			galnt13	UDP-N-acetyl-alpha-D-galactosamine:polypeptide N-acetylgalactosaminyltransferase 13 (GalNAc-T13)	ND	GALNT13		FP003600.4	9
CATGCTCTCAATGTCTTCGGCCCGTCG	6M T	1	0	1			LOC100334793	galanin receptor type 2-like	ND	GALR2		AL807798.17	12
CATGGCAGAGGGCAAAGGGCCCTGTGG	6M T	1	0	1			si:dkeyp-66g8.1	transcriptional repressor p66-beta	Dr.74110	GATAD2B		CR388201.6	19
CATGCCATTTTGCAGCATATCTCCTTT	2M T	1	1	0			polr2m	polymerase (RNA) II (DNA directed) polypeptide M	Dr.160568	GCOM1		BX324153.4	7
CATGACTGAATTCATTAAAATCACCAA	2M T	1	1	0			LOC100148564	geminin coiled-coil domain-containing protein 1-like	ND	GEMC1		CU019657.5	15
CATGTGAAGTTTCAGCTCAAAATACCA	6M T	1	0	1			ghrhrl	growth hormone releasing hormone receptor, like	Dr.104199	GHRHR		CU633968.5	23
CATGTAAGATGATCAGAGAGATGGAGA	2M T	1	1	0			LOC100332628	sim to GIMAP7 GTPase, IMAP family member 7	ND	GIMAP7		CU302326.8	3
CATGTGAGATCAATGGCAGACAGGTCA	2M T	1	1	0			LOC571115	GTPase IMAP family member 7-like	ND	GIMAP7		CR394546.9	3
CATGGGAGCAACGGTGGGCTCTGTGGC	2-6M T	1	3	2			si:dkeyp-69e1.8	weak sim to GIMAP7 | GTPase, IMAP family member 7	Dr.86802	GIMAP7		CR383684.7	3
CATGACTGAATCTGTGGAACGATCAGA	2-6M T	1	1	1			LOC560863	GTPase IMAP family member 8-like	Dr.152377	GIMAP8		NW_003336217.1	25
CATGCAAGTAAAGATGACTCCGTAACG	2M T	1	2	0			LOC100535956	very weak sim to GIN1 | gypsy retrotransposon integrase 1	ND	GIN1		CT583678.9	2
CATGGAAAAGGCCTGACGAGCCCCACA	2M T	1	1	0			LOC568935	ARF GTPase-activating protein GIT1-like	Dr.90693	GIT1		CU570681.6	15
CATGACTGTCGATCTTGAGTCATTCAA	2M T	1	2	0			glcea	glucuronyl C5-epimerase a	Dr.81192	GLCE		CU467844.4	25
CATGTCTAAAACATAAATTAAGCATTA	2M T	1	2	0			colm	collomin	Dr.108644	GLDN		BX908722.4	18
CATGAGTCTGAGAGCACTTTAACAAAG	2M T	1	1	0			glra4b	glycine receptor, alpha 4b	Dr.83330	GLRA2		BX470076.3	5
CATGCCAACTAGTAAAATCAACAAAGG	6M T	1	0	1			LOC797518	guanine nucleotide-binding protein subunit alpha-12-like	ND	GNA12		BX569798.16	1
CATGAACTAACAATGAACAATGTTTTT	6M T	1	0	1			si:dkey-15j16.3	weak sim to GPA33 | glycoprotein A33 (transmembrane)	Dr.79975	GPA33		BX255904.6	20
CATGATTGTGGTGGTTGTCTTGGTGTT	2M T	1	1	0			gper	G protein-coupled estrogen receptor 1	Dr.148317	GPER		CR382361.9	3
CATGACAAGACTCTGGCCACGCAGTTA	2-6M T	1	1	6			LOC100001479	glucose-dependent insulinotropic receptor-like	Dr.149130	GPR119		AL935199.4	21
CATGCTGGTTCAGGGCGATGCTGGCGA	2-6M T	1	1	1			gpr137ba	G protein-coupled receptor 137ba	Dr.118817	GPR137B		CR387921.7	17
CATGCAGGGCTTCCTGAACACGCTGGC	6M T	1	0	1			gpr143	G protein-coupled receptor 143	Dr.151599	GPR143		CU469547.8	9
CATGTCTGGACCCCTTCATCTACTTCT	2-6M T	1	2	1			gpr183	G protein-coupled receptor 183	Dr.111220	GPR183		BX470183.5	9
CATGGAAAACGAATACTACACTCAAAG	2-6M T	1	1	1			LOC557394	G-protein coupled receptor 26-like	ND	GPR26		CR387992.11	1
CATGTCTGCAAAAGACTCCATAGTGCA	6M T	1	0	2			zgc:152692	weak sim to GPR4 | G protein-coupled receptor 4	Dr.92647	GPR4		CR848025.19	15
CATGTTAATGTAAAAATAGAACATCCT	6M T	1	0	1			LOC561668	G protein-coupled receptor 75-like	Dr.67263	GPR75		FP067401.5	13
CATGTTGCTCTAACCCAAGTACTGTGG	6M T	1	0	1			LOC798089	weak sim to GPRIN2 | G protein regulated inducer of neurite outgrowth 2	Dr.81550	GPRIN2		CR678095.18	12
CATGTTGTTCTTGTCTGAAATGGGGTT	2M T	1	1	0			LOC556170	very weak sim to GPSM1 | G-protein signaling modulator 1	Dr.114570	GPSM1		BX005479.5	3
CATGGAGGCCGCTCTGCGGAGACTGAA	2M T	1	1	0			Dr.151663	sim to GPT2 | glutamic pyruvate transaminase (alanine aminotransferase)	Dr.151663	GPT2		NW_003334124.1	2
CATGAAAGCGAGCTGGAAAAATGGAGG	2M T	1	1	0			LOC568698	GRAM domain-containing protein 1B-like	ND	GRAMD1B		AL953903.8	10
CATGCAAACCACCATCAGAGCAAAAAG	2M T	1	1	0			grhl3	grainyhead-like 3	Dr.118917	GRHL3		AL928908.16	17
CATGAAAGGTTTGGAGAAGTCGATGAC	2M T	1	1	0			grik5	glutamate receptor, ionotropic, kainate 5	Dr.118436	GRIK5		CR388405.10	16
CATGTTCAGTGCTCTGTGGATTTTCTG	2M T	1	1	0			LOC100333101	glutamate [NMDA] receptor subunit 3A-like	Dr.112273	GRIN3A		CT956066.6	11
CATGTACTGCAATAAGCAGGTCATCAT	6M T	1	0	1			grip1	glutamate receptor interacting protein 1	Dr.54231	GRIP1		BX248099.5	4
CATGGCAACAGGGGATGATTGACAGCG	2M T	1	1	0			grk7b	G protein-coupled receptor kinase 7b	Dr.88577	GRK7		CU326349.2	18
CATGTTAACGGGAAGGTTGAGGTTTTC	2M T	1	1	0			LOC100151093	glutathione S-transferase kappa 1-like	Dr.140021	GSTK1		BX510336.6	16
CATGTGACACTGAATGATATGATTAAG	2M T	1	1	0			guca1a	guanylate cyclase activator 1A	Dr.82952	GUCA1A		BX537162.5	4
CATGTAAGCATCACCTATTGTCTCCAC	6M T	1	0	1			LOC557191	guanylate cyclase soluble subunit beta-2-like	ND	GUCY1B3		CR352256.11	11
CATGCTCAACGACATCTACAAAAACTT	2M T	1	1	0			LOC568219	heat-stable enterotoxin receptor-like	ND	GUCY2C		CU462845.5	12
CATGCAAAAATTGTCCATTTCTTGGGA	2M T	1	1	0			gyg2	glycogenin 2	Dr.113618	GYG2		BX322647.12	1
CATGATATGATTGATCGCGGCTGGTCT	2M T	1	1	0			hapln2	hyaluronan and proteoglycan link protein 2	Dr.81105	HAPLN2		CR848047.6	16
CATGGTTCTTGACGTATAGTATTTCCC	6M T	1	0	1			has2	hyaluronan synthase 2	Dr.82516	HAS2		BX936449.10	16
CATGGCACCCCACTCAGCCACACTCGC	2M T	1	1	0			her12	hairy-related 12	Dr.29089	HES5		CU062502.10	23
CATGGATGGACATTATTTTCTAGACAT	6M T	1	0	1			her15.1	hairy and enhancer of split-related 15.1	Dr.117051	HES5		AL929185.14	11
CATGGATGGACTTTATTTTCTAGACAT	6M T	1	0	1			her15.2	hairy and enhancer of split-related 15.2	Dr.107470	HES5		AL929185.14	11
CATGCAAATATTAAAAACAATCATTTG	2M T	1					LOC100148329	hairy-related 4.2-like	Dr.121752	HES5		CU062502.10	23
CATGGGAGAAGAATTGCCTGTACTCTT	2M T	1	1	0			LOC100149863	hairy-related 4.1-like	Dr.32742	HES5		CU062502.10	23
CATGGGCTTCATCGCTGATTTCCTTCG	6M T	1	0	1			hfm1	HFM1, ATP-dependent DNA helicase homolog	Dr.113873	HFM1		BX927353.7	2
CATGGACACGTACTGGGACAGAACCGG	2-6M T	1	1	1			hhex	hematopoietically expressed homeobox	Dr.79053	HHEX		NW_003040070.1	12
CATGCCCTGAACCAGACCTTGTTTATC	6M T	1	0	1			LOC557306	hippocampus abundant transcript 1 protein-like	Dr.131870	HIAT1		CU856539.6	10
CATGACCAAAACACACCACAGCCTTTT	2M T	1	1	0			hif1aa	hypoxia-inducible factor 1, alpha subunit (basic helix-loop-helix transcription factor) a	Dr.161508	HIF1A		BX649520.20	13
CATGTTTACTTGGCACAACCAGATAGT	6M T	1	0	1			hint3	histidine triad nucleotide binding protein 3	Dr.91151	HINT3		CT025588.12	16
CATGTTGTCCCAAAACAAATTAAGTTA	2M T	1	1	0			zgc:110425	sim to HIST1H1B | histone cluster 1, H1b	Dr.31410	HIST1H1B		FP325123.4	7
CATGCTAGGGTATATTGAAGTAGCAGC	6M T	1	0	1			zgc:113984	sim to HIST2H3C | histone cluster 2, H3c	Dr.120908	HIST2H3C		CR762436.8	25
CATGAGTGTTTAGGGGAAGTTCTGCGT	2M T	1	1	0			LOC556955	minor histocompatibility protein HA-1-like	Dr.88473	HMHA1		NW_003334190.1	2
CATGGCGGGGGGAAATGGAATGTAATG	2M T	1	1	0			hrc	Hrc protein	Dr.79314	HRC		CU571308.3	12
CATGTCTACCTTTTTACATTCCAGTCG	6M T	1	0	1			hs3st3b1a	heparan sulfate (glucosamine) 3-O-sulfotransferase 3B1a	Dr.86284	HS3ST3B1		BX769173.6	3
CATGATGGTTGTTTATACCCCTCAAAA	6M T	1	0	1			hsf1	heat shock transcription factor 1	Dr.8301	HSF1		CT574549.14	19
CATGTAAATCCTGCCATTATTTACTCA	2M T	1	1	0			hspb7	heat shock protein family, alpha-crystallin-related, b7	Dr.85262	HSPB7		NW_001878409.2	23
CATGCCGATCAGCATCGTCTACACGGT	6M T	1	0	1			htr1bd	5-hydroxytryptamine (serotonin) receptor 1bd	ND	HTR1D		BX000443.5	17
CATGGAGTTCTCATCCATCGTGTGATT	6M T	1	0	1			LOC797799	sim to serine protease	Dr.160512	HTRA2		BX901922.9	13
CATGAAAATGACAGCAGGGATTTCCTT	2-6M T	1	1	1			LOC799791	sim to HtrA serine peptidase 2	ND	HTRA2		BX901922.9	13
CATGGGCTCTGTGTTGCGTTCAACATC	6M T	1	0	1			LOC567869 (LOC100330444)	hyaluronidase-2-like	ND	HYAL2		CU694224.12	6
CATGGCGGCGCCCGCAGTGTGCAGTTT	2M T	1	1	0			LOC100149182	peptidyl-tRNA hydrolase ICT1, mitochondrial-like	Dr.134025	ICT1		CU611036.9	12
CATGCCAGAGATCCTGTTCAACATCTC	2M T	1	1	0			ift122	intraflagellar transport 122 homolog	Dr.79009	IFT122		NW_003336582.1	5
CATGATGTTTGGAGAAGGGACGATTCT	2M T	1	1	0			nitr3b	novel immune-type receptor 3b	Dr.83338	IGK@		AL591482.3	7
CATGATGTTTGGAGAAGGAACGATTCT	2-6M T	1	1	1			nitr3d	novel immune-type receptor 3d	Dr.89728	IGK@		AL591482.3	7
CATGTTGGAGAATGGCTGCTTAACCCA	6M T	1	0	1			si:ch211-247j6.1	immunoglobulin superfamily member 3 precursor	Dr.86074	IGSF3		CR762444.16	9
CATGGGTGTTTCTACTCTGATGATGAG	2M T	1	1	0			igsf9b	immunoglobulin superfamily, member 9b	Dr.156103	IGSF9		BX323451.12	8
CATGTGCTCCTTCCCATAGTAGATACA	6M T	1	0	1			il13ra2	interleukin 13 receptor, alpha 2	Dr.25788	IL13RA2		CR753866.9	5
CATGGGAAACTATACCTGTAATGTAGA	6M T	1	0	1			il1rapl2	interleukin 1 receptor accessory protein-like 2	Dr.79758	IL1RAPL2		BX942840.12	14
CATGGAAAACATACGGGGATTTTGAGG	6M T	1	0	1			crfb12	cytokine receptor family member B12	Dr.90964	IL20RA		BX510931.8	5
CATGTAGTTGATGGCTCTGCAGGCGTC	2M T	1	1	0			il6	interleukin 6 (interferon, beta 2)	Dr.162566	IL6		NW_003335755.1	19
CATGAGCGCCGCCCGCGGGACCGTCTG	2M T	1	1	0			LOC100329520	inhibin beta B chain-like	ND	INHBB		NW_003042842.2	1
CATGTTCCAGTCTGACCAGCAGGGCGG	2-6M T	1	1	1			inpp4ab	inositol polyphosphate-4-phosphatase, type Ib	Dr.139284	INPP4A		CR407558.22	6
CATGGACTCGGAGCGTAAAAGCAAACC	6M T	1	0	1			LOC792891	insulinoma-associated protein 1-like	Dr.149072	INSM2		BX649530.13	17
CATGAGCGAAATCAATCATCCTCACCT	6M T	1	0	1			ipmka	inositol polyphosphate multikinase a	Dr.152782	IPMK		CT583720.8	13
CATGGAGGGCAAACACAGTGCCTTGCC	6M T	1	0	1			iqch	IQ motif containing H	Dr.70161	IQCH		BX247951.11	18
CATGTTCAAAGAGCGCCTGAAGCCCGA	2M T	1	1	0			LOC100334106	IQ motif and SEC7 domain-containing protein	Dr.158563	IQSEC1		NW_001878396.3	23
CATGATTGAGGTTAATCTGACCGCACT	2M T	1	1	0			irf3	interferon regulatory factor 3	Dr.117120	IRF3		BX276093.11	12
CATGTTGGCTAAAGAAATAAGAAAGCA	6M T	1	0	1			DT065994.1	sim to IRGC | immunity-related GTPase family, cinema	ND	IRGC		CR391937.10	16
CATGCGCTCTTTCTGTTGAGGTCAGCA	6M T	1	0	1			irgq2	immunity-related GTPase family, q2	Dr.74093	IRGC		BX072550.6	16
CATGCCAACACATTCATACCCAGAGGA	2M T	1	1	0			LOC559281	Insulin receptor substrate 1-B-like	Dr.3152	IRS1		CR854907.6	15
CATGATGATGTCTCCTAACAGTAGCTG	2M T	1	1	0			LOC566919	sim to insulin receptor substrate 1	ND	IRS1		BX294181.5	5
CATGAGGAAACTTATTTCTCAGGATCC	2M T	1	1	0			irx2a	iroquois homeobox protein 2, a	Dr.88466	IRX2		CU658470.6	16
CATGTTTCCAAGGGTAAACTTGCCACA	2M T	1	2	0			itga8	integrin, alpha 8	Dr.118525	ITGA8		CR936250.9	16
CATGTCAGCAGTGCCTGGCTGTGCATC	2M T	1	1	0			itgb3b	integrin beta 3b	Dr.74767	ITGB3		BX530026.5	12
CATGCTGTTGCATTCAAACGTACTTGG	2M T	1	1	0			LOC797491	integrin beta-7-like	ND	ITGB7		AL954698.9	6
CATGTTGTATTTTTAATTAAGATTACT	2M T	1	1	0			zgc:153219	sim to ITLN1 intelectin 1 (galactofuranose binding)	Dr.109947	ITLN1		BX571811.5	7
CATGTACCAAAAGATGATCGAGGTGGA	2M T	1	1	0			itpkb	inositol-trisphosphate 3-kinase B	Dr.86181	ITPKB		BX649588.5	20
CATGACTGAGAACACACTCCAGATCTG	2M T	1	1	0			LOC100334213	janus kinase and microtubule-interacting protein 3-like	Dr.126331	JAKMIP3		NW_003335091.1	12
CATGGATGGAACCTCACCGTCCTTCCC	2M T	1	1	0			jarid2b	jumonji, AT rich interactive domain 2b	Dr.108454	JARID2		BX890540.5	19
CATGAATCGATTGATGTAGCTCAGTGC	6M T	1	0	1		Y	jazf1a	JAZF zinc finger 1a	Dr.74107	JAZF1		BX601646.5	19
CATGACGGACACTATGGCAATCCCTCT	2M T	1	1	0			LOC571208	potassium voltage-gated channel subfamily A member 1-like	ND	KCNA1		NW_003334296.1	4
CATGAGAACAGACAAACTGCTCATCGC	2M T	1	2	0			kcnh2l	potassium voltage-gated channel, subfamily H (eag-related), member 2 like	Dr.80244	KCNH2		CR788285.5	2
CATGTACTGTTGGTGTGCCTCCAGGAA	6M T	1	0	1			zgc:110418	potassium channel subfamily K member 6	Dr.407	KCNK6		CU595952.10	18
CATGGTATATCGGATTCCTTTGCCTCA	6M T	1	0	1			kcnq2a	potassium voltage-gated channel, KQT-like subfamily, member 2a	Dr.116145	KCNQ2		CR847543.13	8
CATGTTCAATAGCGTATTCCAGAGTGG	2M T	1	1	0			LOC559915	potassium voltage-gated channel subfamily V member 1-like	ND	KCNV1		BX511123.10	16
CATGAGTTTGTGTCGAGATCAAACCCT	2M T	1	1	0			si:dkey-266m15.6	sim to KCP kielin/chordin-like protein	Dr.103441	KCP		CU467655.8	18
CATGTCAGACGGATGGAAGTTTGAACA	6M T	1	0	2		Y	kctd2	potassium channel tetramerization domain containing 2	Dr.86224	KCTD2		BX470098.15	12
CATGAGGTGTGTGTTATTCCCAGATGA	2M T	1	1	0			LOC100535045	uncharacterized protein KIAA0146-like	Dr.155992	KIAA0146		FQ323106.10	24
CATGAACTGAAGTACCTTCATCTGCCC	2-6M T	1	1	1			LOC562097	KIAA0895-like	Dr.160036	KIAA0895		BX255936.11	7
CATGTTCCCCGATCTTGTGTCGAAAGT	2-6M T	1	1	1			si:ch211-238n5.4	protein LCHN	Dr.75978	KIAA1147		BX470166.11	18
CATGCCTTGTCGTTCTTTGATTTTGCT	2M T	1	1	0			LOC562320	leucine-rich repeat and WD repeat-containing protein KIAA1239-like	ND	KIAA1239		AL935029.6	7
CATGTAGATGTGCGTATGTGTACCTTC	2M T	1	1	0			si:ch211-1e14.1	weak sim to KIAA1549L | KIAA1549-like	Dr.141198	KIAA1549L		AL929229.6	18
CATGCCGGCCATCTAGTCCCTCTGCCT	6M T	1	0	1		Y	si:ch211-132b12.7	very weak sim to KIAA1737	Dr.81141	KIAA1737		BX664607.21	18
CATGCTGACAGACGAGACTGAAGCAGT	2M T	1	1	0			LOC564155	protein KIAA1967 homolog	Dr.116826	KIAA1967		CR394525.8	10
CATGCAGATGGAGGAGGCCAAGGAGGA	2M T	1	1	0			kif21a	kinesin family member 21A	ND	KIF21A		BX957352.9	25
CATGGCTCCTTCTTTAGCTTCTCTCAG	6M T	1	0	2			LOC799274	kinesin heavy chain isoform 5A-like	Dr.149320	KIF5A		CU929047.11	6
CATGAAGGAGGAGCTGATAAAAGAGCT	6M T	1	0	1			kif7	kinesin family member 7	Dr.86796	KIF7		CU467822.7	7
CATGCTCGATTTGTGCGCAGCGACCAC	6M T	1	0	1			LOC793794	Krueppel-like factor 10-like	Dr.22938	KLF10		CR524823.18	16
CATGCCTGTCCGATACAACCGCAGGAC	6M T	1	0	1			LOC100006043	Kruppel-like factor 5-like	ND	KLF5		CR788257.9	1
CATGGAGGATGATGATGAAGAGGAGCG	2M T	1	2	0			zgc:162310	sim to KLHDC2 | kelch domain containing 2	Dr.82019	KLHDC2		NW_003335565.1	17
CATGGGCGACAGCCTTTCCCATTTCCT	2-6M T	1	1	1			LOC794258	kelch domain-containing protein 8A-like	ND	KLHDC8A		AL928854.6	11
CATGATATCCTCTGCCTGTTCCACCCT	2M T	1	1	0			zgc:162298	sim to KLHL4 | kelch-like 4	Dr.103328	KLHL4		BX571940.12	14
CATGAGCCTCAGCAGAGACGCTGTGGG	2M T	1	2	0			klhl5	kelch-like 5	Dr.97556	KLHL5		CR762406.12	1
CATGTCGGGAGCAATTCAGACTCAAAG	2M T	1	2	0			kremen1	kringle containing transmembrane protein 1	Dr.107566	KREMEN1		CT737139.10	5
CATGCAAAACCTGAACGATCGTCTGGC	2-6M T	1	1	3			LOC556118	sim to KRT19 | keratin 19	ND	KRT19		BX469912.5	11
CATGTCTGTGTCTCAAAAGGAAGAAGA	6M T	1	0	1			lca5	Leber congenital amaurosis 5	Dr.70084	LCA5		CR735144.8	23
CATGGAGAACGGCAGCTTGGTGGATTT	6M T	1	0	1			lck	lymphocyte-specific protein tyrosine kinase	Dr.91511	LCK		AL772189.7	17
CATGACTCTGGTTGGTCAACCTAAAGG	2-6M T	1	1	1			si:dkey-71h2.2	sim to LDLRAP1 | low density lipoprotein receptor adaptor protein 1	Dr.119526	LDLRAP1		BX842692.18	20
CATGTCCTCTGTCCATATCCATAGAAA	2M T	1	1	0			lft2	lefty2	Dr.80504	LEFTY2		BX248131.6	17
CATGAGGATCACACGGTGTACACAAAA	6M T	1	0	1			zgc:112492	weak sim to lectin, galactoside-binding, soluble, 3 binding protein	Dr.152407	LGALS3BP		CU570690.8	3
CATGGTGCTCCAATGGGACCACATCGA	2M T	1	1	0			lgi2a	leucine-rich repeat LGI family, member 2a	Dr.87799	LGI2		CU929396.9	7
CATGTGTATCATAACCTGACCTCTTTG	2M T	1	1	0			lhx1b	LIM homeobox 1b	Dr.277	LHX1		BX255908.4	5
CATGGGTTTGGTGGGAGACGGTGCTTG	2-6M T	1	2	1			im:7155904	sim to LIM domain and actin binding 1	Dr.78055	LIMA1		AL935272.17	11
CATGGGGAAACAGTGGCACGTGGAGCA	2-6M T	1	1	1			lims2	LIM and senescent cell antigen-like domains 2	Dr.10610	LIMS1		CU638712.5	9
CATGCTATAATGCATTCTCTACCAGTC	6M T	1	0	1			lingo1b	leucine rich repeat and Ig domain containing 1b	Dr.12903	LINGO1		BX470207.6	7
CATGTTTAAAAGGTTAAAATATCTTTG	2M T	1	4	0			LOC100536368	transposon TX1 uncharacterized 149 kDa	ND	LOC100128274		CR388189.21	2
CATGTGTTGTAAAAACATATCAGTGTA	6M T	1	0	1			LOC799157	sim to LOC100130705	Dr.110658	LOC100130705		AL929185.14	11
CATGAGCACTTCCACGCGACCCTCTGC	2M T	1	1	0			loxl4	lysyl oxidase-like 4	Dr.124447	LOXL4		CU462910.9	13
CATGACTAGCTTGCTTACAGCGTTCCA	2M T	1	1	0			lpar1	lysophosphatidic acid receptor 1	Dr.32070	LPAR1		CU694479.6	10
CATGTTTGATCCATCGCTGTTAGAATG	6M T	1	0	1			si:rp71-15d4.1	sim to LPXN | leupaxin	Dr.90117	LPXN		BX901930.17	8
CATGTCTAACACACTTGGCACTGAACG	6M T	1	0	1			lrig2	leucine-rich repeats and immunoglobulin-like domains 2	Dr.39995	LRIG2		CR391948.7	6
CATGGCAGGCATTTCAGAGGCCGTCGT	6M T	1	0	1			lrit3	leucine-rich repeat, immunoglobulin-like and transmembrane domains 3	Dr.110780	LRIT3		CR559943.6	13
CATGAGCAGACGGAGGATTCAGTCACT	6M T	1	0	1			dicp1.1	diverse immunoglobulin domain-containing protein 1.1	Dr.93123	LRRC4		NW_003334232.1	3
CATGTTGTTCCACCGGAGATCCAGCTC	2-6M T	1	1	1			lrrc45	leucine rich repeat containing 45	Dr.158857	LRRC45		BX548040.19	12
CATGTATTGTGATCCATATGGGTGAGT	2M T	1	2	0			lrrc8c	leucine rich repeat containing 8 family, member C	Dr.78515	LRRC8C		CU928017.7	6
CATGAAAATATGTAACAGAACACGATT	2-6M T	1	1	2			im:7140212	sim to LRRC8D | leucine rich repeat containing 8 family, member D	ND	LRRC8D		BX927353.7	2
CATGACTGGTCTCGTACTCATTATAGG	6M T	1	0	1			lrrtm2	leucine rich repeat transmembrane neuronal 2	Dr.131868	LRRTM2		CR381529.13	14
CATGTGAGGAATGTAAAAAATACAAAA	2M T	1	1	0			zgc:163064	weak sim to LTBR | lymphotoxin beta receptor (TNFR superfamily, member 3)	Dr.90354	LTBR		CR848022.11	11
CATGTTTCCTGTGTGCATTTCAGTTTT	6M T	1	0	2			zgc:171930	sim to LURAP1 | leucine rich adaptor protein 1	Dr.126132	LURAP1		BX901950.7	6
CATGCATTAGCGCATAATGACTGTAGG	2M T	1	2	0			lyz	lysozyme	Dr.83681	LYZL1		AL929225.6	24
CATGAAGACTTAATCAGAGACTGGAAT	6M T	1	0	1			lzts2b	leucine zipper, putative tumor suppressor 2b	Dr.81590	LZTS2		NW_003335114.1	12
CATGTCATTCCAAACCCCTGAGACCTT	6M T	1	0	2			LOC567481	microtubule-actin cross-linking factor 1, isoforms 1/2/3/5-like	ND	MACF1		CR848788.7	16
CATGTGCTGTCCTGTGTGCTCTCTTAT	2-6M T	1	1	2			mafl	V-maf musculoaponeurotic fibrosarcoma (avian) oncogene family, protein L	Dr.83037	MAFA		BX470204.13	6
CATGCCCGACCACTGGGAGATGGCCTA	6M T	1	0	1			magi1a	membrane associated guanylate kinase, WW and PDZ domain containing 1a	Dr.76181	MAGI1		CU638733.4	8
CATGGGCCTCTACATCCTGCGTCTGGC	6M T	1	0	1			LOC564220	sim to MAGI3 | membrane associated guanylate kinase, WW and PDZ domain containing 3	ND	MAGI3		AL929512.14	6
CATGGGACAACTCTCCTACAAATGTAA	6M T	1	0	1			man1b1	mannosidase, alpha, class 1B, member 1	Dr.83782	MAN1B1		CT956057.9	5
CATGTTGTTTAAGATGTGCTGGGTCTG	6M T	1	0	1			man2a2	mannosidase, alpha, class 2A, member 2	ND	MAN2A2		CU896654.5	25
CATGACGAAAAGGCACCCAGGCCAATC	2M T	1	1	0			LOC100334486	mitogen-activated protein kinase kinase kinase 1-like	Dr.87896	MAP3K1		AL954770.9	10
CATGTCCAGGAGGCTCTGATGGACACC	6M T	1	0	1			LOC560932	mitogen-activated protein kinase kinase kinase 10-like	ND	MAP3K10		BX548069.7	18
CATGGCGAACAGGCGGGCTTCGTTCTG	6M T	1	0	1			Dr.117462	sim to MAP3K11 | mitogen-activated protein kinase kinase kinase 11	Dr.117462	MAP3K11		NW_003050289.2	7
CATGTCAGGAGCAGGGTGTTCACACGA	6M T	1	0	1			LOC100334289	mitogen-activated protein kinase kinase kinase 15-like	Dr.162310	MAP3K15		CR936282.7	24
CATGTACATCTCAGTGCCACGTAGGTC	2M T	1	1	0			LOC563727	mitogen-activated protein kinase kinase kinase 8-like	Dr.149692	MAP3K8		BX470141.4	12
CATGTATGGGACCATCAAGTCTCCAAA	6M T	1	0	1			masp1	mannan-binding lectin serine peptidase 1 (C4/C2 activating component of Ra-reactive factor)	Dr.118326	MASP1		BX571739.9	15
CATGCAGGTTGCTGTAGTTCTAAAGGG	2-6M T	1	1	3			mbnl2	muscleblind-like 2	Dr.65436	MBNL2		CR847928.12	1
CATGCTGACGCATCAACAGACAGATCT	2M T	1	2	0			LOC799290	myelin basic protein-like	Dr.159303	MBP		CU459091.8	16
CATGAAAAATCCCCTTCCTACAGTTTC	2M T	1	1	0			mcf2l2	MCF.2 cell line derived transforming sequence-like 2	Dr.94387	MCF2L		CT990625.10	11
CATGCCGAGTGTGGAAAGAGAAATCCA	2M T	1	1	0			LOC100150764	melanin-concentrating hormone receptor 2-like	ND	MCHR2		CR848819.6	16
CATGATATTAATGATGATGGTCCACTG	2M T	1	1	0			mchr2 (LOC558520)	melanin-concentrating hormone receptor 2-like	ND	MCHR2		BX465217.13	24
CATGGCTCTCCATCTCAGTACTGGACT	2M T	1	1	0			med15	mediator complex subunit 15	Dr.78410	MED15		BX649630.9	21
CATGGAAACAAGGTTGTCAGGGTCAGT	2M T	1	1	0			LOC100538095	sim to MEGF6 | multiple EGF-like-domains 6	Dr.133257	MEGF6		CU571378.14	11
CATGTTTAATTTTTATTTTTTAAGAAA	2M T	1	1	0			metrnl	meteorin, glial cell differentiation regulator-like	Dr.79446	METRNL		BX537276.5	3
CATGATGATCCTCCTCCAGCATCAGCT	2M T	1	1	0			LOC797633	very weak sim to METTL2A | methyltransferase like 2A	Dr.40686	METTL2A		CU467646.17	4
CATGGTCTAAATGTTGGTTTCATCTGG	2M T	1	1	0			LOC797005	malignant fibrous histiocytoma-amplified sequence 1 homolog	Dr.87607	MFHAS1		BX511222.10	21
CATGCAGACAATCTCCTTAATAAAAAG	2M T	1	1	0			LOC100329462	mitofusin-1-like	Dr.158703	MFN1		NW_003334143.1	2
CATGACAGGATAGGATTTAACATAATT	6M T	1	0	1			mfn1	mitofusin 1	Dr.121043	MFN1		NW_003046295.1	11
CATGCCAGGCAAGATATATGTAGAGAT	6M T	1	0	1			mfsd11	major facilitator superfamily domain containing 11	Dr.91346	MFSD11		CU463857.9	3
CATGTAAAATATCTGGGAGCAAGTCCT	6M T	1	0	1			LOC100150581	sim to human and mouse major facilitator superfamily domain containing 9 (MFSD9)	ND	MFSD9		CT030738.8	9
CATGCTTCTATCTGAATTGCAGGGGAA	6M T	1	0	1			mitd1	MIT, microtubule interacting and transport, domain containing 1	Dr.83003	MITD1		BX942813.20	9
CATGTCAGAGTCTAGTCAAGAATGAAA	6M T	1	0	1			mitfa	microphthalmia-associated transcription factor a	Dr.81296	MITF		BX927362.10	6
CATGAGATCTATGAAAAGATGATTGTG	2M T	1	1	0			LOC100535175	sim to MLLT1 myeloid/lymphoid or mixed-lineage leukemia (trithorax homolog, Drosophila); translocated to, 1	Dr.116744	MLLT1		BX571790.8	20
CATGGAGGGTTTCTCTGGCATTGGTTA	6M T	1	0	1			mllt10	myeloid/lymphoid or mixed-lineage leukemia (trithorax homolog, Drosophila); translocated to, 10	Dr.37146	MLLT10		CR376737.4	24
CATGCACATAAGGGTAAATTGGTGGAC	2M T	1	1	0			mllt11	myeloid/lymphoid or mixed-lineage leukemia (trithorax homolog, Drosophila); translocated to, 11	Dr.105651	MLLT11		FP085396.16	19
CATGCTCATACTCAGTAGGCTGGTATC	6M T	1	0	1			mmd2	progestin and adipoQ receptor 10	Dr.114436	MMD2		BX649536.8	3
CATGAGCTGGGTCACGCATTAGGACTG	2M T	1	1	0			LOC100333071	matrix metalloproteinase-16-like	Dr.110859	MMP16		CT737162.7	24
CATGTGCACTTACGTTAGCTGTAAGCT	2M T	1	1	0			mmrn2b	multimerin 2b	Dr.89556	MMRN2		CR847541.8	12
CATGGCATTACCGTCCAGATGGGGCTA	6M T	1	0	3			mpz	myelin protein zero	Dr.78005	MPZ		BX294126.10	2
CATGCAAGTGTCAGAACATTATCAGGT	2-6M T	1	1	3			zgc:153728	weak sim to MR1 | major histocompatibility complex, class I-related	Dr.119272	MR1		BX927188.11	19
CATGTACTGCTCTCTCATCGCACTGAA	2M T	1	1	0			si:rp71-1n18.3	sim to MRAS | muscle RAS oncogene homolog	Dr.120103	MRAS		AL645755.20	22
CATGACGCAGAGCCGATGTGTGCGTGA	2M T	1	1	0			mrpl14	Mitochondrial ribosomal protein L14	Dr.85340	MRPL14		CR762439.7	13
CATGTTGCAGGAGTTTCACCTCTTCAA	6M T	1	0	2			LOC559887	membrane-spanning 4-domains subfamily A member 4A-like	Dr.29846	MS4A4A		CU694374.7	4
CATGCAGCAGGAGTTTCACCTCTTCAA	6M T	1	0	2			ms4a17a.6	membrane-spanning 4-domains, subfamily A, member 17A.6	Dr.29846	MS4A4A		CU694374.7	4
CATGGATTGATTCGGTAATGTCACATT	2M T	1	1	0			msxb	muscle segment homeobox B	Dr.75069	MSX2		CR812943.11	1
CATGGGAACTCCTCTGTCTTGGCAGAT	6M T	1	0	1			mthfd1l	methylenetetrahydrofolate dehydrogenase (NADP+ dependent) 1-like	Dr.79162	MTHFD1L		BX537272.5	20
CATGCTCATTCCAGTTCAACGAGGCCT	2M T	1	1	0			LOC100333801	myotubularin-related protein 3-like	ND	MTMR3		NW_003334319.1	5
CATGGCGTATTTCAACAGTTGTCTGAA	6M T	1	0	1			mtnr1c	melatonin receptor 1C	Dr.88563	MTNR1A		BX511098.5	5
CATGTGAAATGTATTAAAAAAATCTCA	2M T	1	1	0			im:6895682	muscle-related coiled-coil protein	Dr.40921	MURC		BX324211.9	2
CATGTCAAAACAGAGAGATTATAAGAC	6M T	1	0	1			mycn	V-myc myelocytomatosis viral related oncogene, neuroblastoma derived (avian)	Dr.75499	MYCN		BX005358.16	20
CATGAGATGGAGGAGGCTCAGGAGCGT	6M T	1	0	1			wu:fd14a01	sim to myosin, heavy chain 4, skeletal muscle	Dr.133503	MYH4		NW_003046186.1	22
CATGCTTGGCTTAAAAAAAAAAAAAAA	2M T	1	1	0			zgc:66286	sim to myosin, light chain 4, alkali; atrial, embryonic	Dr.5549	MYL4		NW_003043815.1	14
CATGGCTTGGCAACCAGCAATCAAGAG	6M T	1	0	1			mylk3	myosin light chain kinase 3	Dr.99965	MYLK3		CU672230.10	7
CATGAGCTGCACCTTCCTGCCCAGCCG	2M T	1	1	0			myo10l1	myosin X-like 1	Dr.160286	MYO10		BX548046.4	6
CATGTGGCAAATCAGGACAGTAGTGAG	2-6M T	1	1	1			si:ch211-106h4.9	sim to MYRIP | myosin VIIA and Rab interacting protein	Dr.44182	MYRIP		CR293515.12	2
CATGCTGGGAGTTCCTGGGCTGGTGCC	2M T	1	1	0		N	LOC572093	nucleus accumbens-associated protein 1-like	Dr.117005	NACC1		CR847925.24	11
CATGTGAACCATTGATATCCTTGCGTC	6M T	1	0	2			nalcn	sodium leak channel, non-selective	Dr.91273	NALCN		BX571786.6	9
CATGTTTCCAGCCTTCTCTGATGCCAG	2M T	1	1	0			si:dkeyp-117b8.3	sim to NAPA N-ethylmaleimide-sensitive factor attachment protein, alpha	Dr.15900	NAPA		CR759879.17	5
CATGGGCTCTGAAGGAGATGGGATACA	2M T	1	1	0			LOC794381	arylamine N-acetyltransferase, pineal gland isozyme	ND	NAT1		BX323797.10	7
CATGCAGGAGATGCACTGAGAGCAGCA	2M T	1	1	0			zgc:109965	sim to NCLN | nicalin	Dr.83836	NCLN		CR792457.15	21
CATGACCAAATGCATCTACTGTGGATT	2M T	1	2	0			ndufs8b	NADH dehydrogenase (ubiquinone) Fe-S protein 8b	Dr.91972	NDUFS8		CT955967.11	14
CATGGACTTCACCAAGAAGGTGTATGA	6M T	1	0	1			necab2	N-terminal EF-hand calcium binding protein 2	Dr.119119	NECAB2		BX548157.5	18
CATGCTACATCTCCAGACATTGTCAAT	2M T	1	1	0			nek6	NIMA (never in mitosis gene a)-related kinase 6	Dr.119985	NEK6		AL772368.5	21
CATGTTGATCCTGTTGTGACATTCTGA	6M T	1	0	1			LOC561946	NTPase KAP family P-loop domain-containing protein 1-like	Dr.135637	NKPD1		BX119916.10	11
CATGACTTGATATTTGTTCATTAATTC	6M T	1	0	1			nkx3.3	NK3 homeobox 3	Dr.38729	NKX2-2		CU929568.8	13
CATGTGACGTGACTCGTCCAGCTCCTC	6M T	1	0	1			nlk2	nemo like kinase, type 2	Dr.143303	NLK		BX649531.7	15
CATGATTAATTTGCTGAAGACTGCAGT	2M T	1	1	0			LOC100001686	protein NLRC3-like	ND	NLRC3		NW_003334286.1	4
CATGTGTACCCAGATCTTTAAGGTGGA	6M T	1	0	1			LOC100001765	protein NLRC3-like	ND	NLRC3		NW_003334286.1	4
CATGTCCATTTAGTAGAGTAGGAGTGT	2M T	1	1	0			LOC100002266	NACHT, LRR and PYD domains-containing protein 1-like	Dr.162425	NLRC3		BX248131.6	17
CATGTGCCACATCCCGGTCTTCTGCTG	2M T	1	1	0			LOC100006280	NACHT, LRR and PYD domains-containing protein 12-like	Dr.139232	NLRC3		CU694442.10	4
CATGTTTGATTTCCTGAAGACTGCAGT	2M T	1	1	0			LOC100007178	novel protein with a NACHT domain	Dr.119465	NLRC3		BX901958.23	22
CATGATCCAGATTGAGTTTGTTCAGTG	2M T	1	1	0			LOC100148107	sim to NOD3 protein	ND	NLRC3		CR936249.11	4
CATGGAGGAGAGAAGTGGATTACAGCC	2M T	1	1	0			LOC100329558	protein NLRC3-like	Dr.119465	NLRC3		BX901892.22	4
CATGAGATCAGACAGATTAAAGCTGCT	2M T	1	2	0			LOC100334677	protein NLRC3-like	Dr.119465	NLRC3		BX324179.14	4
CATGATTGAGATGTCAGGGGAGCCGCT	2-6M T	1	3	7			LOC100535477	NACHT, LRR and PYD domains-containing protein	ND	NLRC3		NW_003336283.1	9
CATGTTCTGGTTGGAGTAAATCCTGCT	2-6M T	1	1	1			LOC100536116	very weak sim to NLRC3 | NLR family, CARD domain containing 3	Dr.120734	NLRC3		CT025651.9	9
CATGTGTACCCAGATCTTTAGGGAGGA	6M T	1	0	1			LOC100537637	NACHT, LRR and PYD domains-containing protein 3-like	ND	NLRC3		BX640461.7	4
CATGATTGAGATTTCAGAGGAGCCGCT	2-6M T	1	7	1			LOC567124	NACHT, LRR and PYD domains-containing protein 3-like	ND	NLRC3		CT027586.15	4
CATGTCTTCATCTGTCAGCTTCTTCTC	6M T	1	0	1			LOC569635	novel NACHT domanin containing protein	Dr.91012	NLRC3		CR854897.8	15
CATGCTGAAACACTGAAGGAATCTCCC	2M T	1	1	0			LOC794656	novel NACHT domain containing protein	Dr.148325	NLRC3		BX548173.6	4
CATGTGTACCCAGACCTTTAAGGAGGA	6M T	1	0	1		N	LOC103909562	very weak sim to NLRC3 | NLR family, CARD domain containing 3	ND	NLRC3		BX248395.9	22
CATGTACTGCTTTGTTCACCTGACTCT	2M T	1	1	0		N	si:dkey-253d23.10	very weak sim to NLRC3 | NLR family, CARD domain containing 3	Dr.120091	NLRC3		BX539307.6	22
CATGAGATCAGACAGATTGATGCTGCT	2M T	1	2	0		N	Dr.154001	weak sim to NLRP12 | NLR family, pyrin domain containing 12	Dr.154001	NLRP12		AL807749.21	4
CATGAGTAACAATGACCTGCAGGATTC	6M T	1	0	1		N	LOC100148609	novel NACHT domain containing protein	ND	NLRP12		BX927287.17	8
CATGATCCAGATGTCTGAGGAAGTGCT	2-6M T	1	1	1		N	LOC100331680	NACHT, LRR and PYD domains-containing protein 12-like	ND	NLRP12		NW_003334294.1	4
CATGTGACCAATCTCAGTGTGTCCAGT	6M T	1	0	1	No hits		LOC794988	weak sim to NLRP12 NLR family, pyrin domain containing 12	ND	NLRP12		NW_001877918.3	4
CATGACTGCCCTTGGATGCAGAGATGT	2M T	1	1	0			si:dkey-10c21.1	weak sim to NOL3 | nucleolar protein 3 (apoptosis repressor with CARD domain)	Dr.88436	NOL3		BX569799.6	9
CATGGGCAAAGGCACAGAACTGTGGGT	2M T	1	1	0			nos2a	nitric oxide synthase 2a, inducible	Dr.85064	NOS2		BX950211.9	5
CATGTCCAGCTTCTCAGGGAATGACCT	6M T	1	0	1			nova2	neuro-oncological ventral antigen 2	Dr.77006	NOVA1		BX950186.10	15
CATGCCAACAACATTAGTGGACAACAT	6M T	1	0	1			LOC561565	sim to Neuropeptide FF receptor 2	ND	NPFFR2		CR391999.10	5
CATGTCCTCAGCAACCAAAGAGGTTCT	2M T	1	1	0			LOC100331745	atrial natriuretic peptide receptor 2-like	ND	NPR2		ND	5
CATGACACGATCTCTTATCACGAACAC	2M T	1	1	0			nr1i2	nuclear receptor subfamily 1, group I, member 2	Dr.27060	NR1I2		CR848676.7	9
CATGTCAGAGGTCACCATTAAGTACCT	6M T	1	0	1			nr2e1	nuclear receptor subfamily 2, group E, member 1	Dr.78647	NR2E1		CU138515.8	20
CATGTTGGCTTCATCCTTAAACTCCTG	6M T	1	0	1			nr6a1a	Nuclear receptor subfamily 6, group A, member 1a	Dr.8104	NR6A1		CU856342.9	8
CATGAAGCCTCACACAGGAACGCTGGT	2-6M T	1	2	2			zgc:66118	sim to neuronal cell adhesion molecule	Dr.26832	NRCAM		CU458950.1	25
CATGTCCTCCCGAGAGCAGCCAAAAAA	6M T	1	0	1			nrg2b	neuregulin 2b	Dr.117716	NRG2		BX323592.7	14
CATGAGCTACAGCTGGAGTCTCAAAGA	2M T	1	1	0			LOC100149557	putative methyltransferase NSUN6-like	Dr.123718	NSUN6		CU607104.20	7
CATGACACACAGCTCCGTGCTGTCCGT	2M T	1	1	0			nt5dc1	5'-nucleotidase domain containing 1	Dr.114574	NT5DC1		BX855610.5	20
CATGTAATGACAGTTGAGGCTGTGTTA	2M T	1	1	0			si:dkey-261e22.1	sim to NUAK1 | NUAK family, SNF1-like kinase, 1	Dr.71821	NUAK1		BX571705.10	4
CATGCACAAGCGCCCGTATCATTCCCA	2M T	1	1	0			numb	numb homolog	Dr.139146	NUMB		CU302376.9	17
CATGAAAGCCCCGTTGTTAAGAGAGAG	6M T	1	0	1			nup98	nucleoporin 98	Dr.15095	NUP98		CR847523.7	21
CATGATATCCACACTCCAGCTGGCAAC	2M T	1	1	0			LOC100331523	very weak sim to NYNRIN | NYN domain and retroviral integrase containing	Dr.136958	NYNRIN		BX324212.9	4
CATGGAAGGCAGCGAGTTCCTGCTCAG	6M T	1	0	6			LOC100535957	very weak sim to NYNRIN | NYN domain and retroviral integrase containing	Dr.136958	NYNRIN		CU467632.5	3
CATGGATTCACTGGGGATGATCTCATT	6M T	1	0	1			oaf	OAF homolog	Dr.149604	OAF		CR848033.12	15
CATGTCTGTCAGCAGTTTACCCTCTTT	2M T	1	1	0			LOC572412	sim to obscurin, cytoskeletal calmodulin and titin-interacting RhoGEF	Dr.59661	OBSCN		CR792456.6	24
CATGCTCCGGGCCCCGCCCACTGTGTC	2M T	1	1	0			oc90	otoconin 90	Dr.76812	OC90		BX005444.14	2
CATGGCGGACTCCAAAAACAAATACAA	2M T	1	1	0			ocstamp	osteoclast stimulatory transmembrane protein	Dr.43142	OCSTAMP		CU639397.9	8
CATGCTGGGTTACTATATCTAACAGAA	2M T	1	1	0			zgc:153720	sim to ODZ3 | odz, odd Oz/ten-m homolog 3	Dr.113659	ODZ3		BX322797.11	1
CATGATGATGATGATGGTGATAAGACA	6M T	1	0	1			odz4	odd Oz/ten-m homolog 4	Dr.81257	ODZ4		AL807754.8	15
CATGGATCTGGCAGTATGTGAATCGGC	2M T	1	2	0			LOC100535938	oncoprotein-induced transcript 3 protein-like	ND	OIT3		CU856520.12	13
CATGATGCAATTCACAACCGTAAATAA	6M T	1	0	1			olig3	oligodendrocyte transcription factor 3	Dr.77024	OLIG3		CU693457.11	13
CATGAAGAAGTTGCTGACCGTGGAGAG	2M T	1	1	0			LOC100332965	one cut domain family member 2-like	ND	ONECUT2		NW_001878252.3	2
CATGAAGAAGTTGCTGACGGTGCTGAG	2M T	1	1	0			onecut3	one cut homeobox 3	Dr.95331	ONECUT2		BX088720.8	22
CATGTCTTGCGCCTTGTGCACCAGGTG	2M T	1	1	0			valopa	vertebrate ancient long opsin a	Dr.81261	OPN1LW		CU915281.12	17
CATGATGAAATAATTAGGCAGGCTCCG	6M T	1	0	1			opn4xb	opsin 4xb	Dr.42169	OPN4		CT737133.10	5
CATGAGCTCAGAGGTCACGCAGGTCAC	2M T	1	1	0			oprm1	opioid receptor, mu 1	Dr.83045	OPRM1		CR352246.7	13
CATGCTCTTCCACCAATGCTACATCCT	2M T	1	1	0			or111-8	http://www.iaeng.org/publication/IMECS2008/IMECS2008_pp190-194.pdf	Dr.88293	OR1M1		AF112374.1	15
CATGTAAAAATGGACACTTTAATTACA	2M T	1	1	0			or111-5	odorant receptor, family D, subfamily 111, member 5	Dr.75770	OR51I1		AF112374.1	15
CATGTCAGTTCATTTCATACTCATCCC	2M T	1	1	0			or120-1	odorant receptor, family E, subfamily 120, member 1	ND	OR52D1		CU915725.10	15
CATGGGACTGTGAAGACTCTCTGTACT	6M T	1	0	1			or112-1	odorant receptor, family A, subfamily 112, member 1 (olfactory receptor 52E4-like)	ND	OR52E4		NW_001877540.3	15
CATGTACAACTTTTTGTAACAACAATG	2M T	1	1	0			or115-1	odorant receptor, family F, subfamily 115, member 1	Dr.82514	OR2AT4		CU104696.9	21
CATGTTCAATCTGGCGCTGGCCGACTT	2M T	1	1	0			LOC100003922	p2Y purinoceptor 1-like	Dr.119208	P2RY1		CU640433.12	18
CATGTACACCGTACTGGGTTTCCAAGG	2-6M T	1	1	1			pr2y4l	pyrimidinergic receptor P2Y, G-protein coupled, 4-like	Dr.117953	P2RY4		AL590151.8	14
CATGGAGAAGAAGGATCTCCAACAATG	2M T	1	2	0			LOC797383	sim to PABPC3 | poly(A) binding protein, cytoplasmic 3	ND	PABPC3		BX571681.7	18
CATGTCAAACACTTCCCTCTGGCCATC	6M T	1	0	1			pacs2	phosphofurin acidic cluster sorting protein 2	Dr.117621	PACS2		FP103009.9	13
CATGCCTTTTTACTCTGGTTGCCACAA	2-6M T	1	1	1		N	palb2	partner and localizer of BRCA2	Dr.92477	PALB2		BX901912.10	1
CATGCATTGTGCCCTTGAGTGACCCTG	2M T	1	1	0		N	pappa2	pappalysin 2	Dr.134212	PAPPA2		CR388403.8	2
CATGAATTATTAATAACCCAGACGTGT	2M T	1	1	0		N	LOC100537098	poly [ADP-ribose] polymerase 6-like	Dr.81059	PARP6		NW_003335655.1	18
CATGCGCCTGATAAACTTAATGTAGTG	2M T	1	1	0		N	parvb	parvin, beta	Dr.79611	PARVB		FP102808.8	17
CATGTCTCAATACTGGTCAAGATTACA	2M T	1	1	0		N	pax6b	paired box gene 6b	Dr.132861	PAX6		BX000453.8	7
CATGAGGCAGATTAGTGAAATGTTTTT	2M T	1	1	0	No hits		pax7a	paired box gene 7a	Dr.75807	PAX7		BX957335.12	11
CATGATCTTGAGGTCCCGCTTCCTTGA	2M T	1	1	0		N	pbx3b	pre-B-cell leukemia transcription factor 3b	Dr.81268	PBX3		CT737172.20	8
CATGATATGTTTGAGTTGGATAAAGTG	2M T	1	1	0	No hits		LOC100535684	protocadherin gamma-A11-like	ND	PCDHGA11		AL929558.13	14
CATGGCTGTCCTATCAGATCTTGAAAT	6M T	1	0	1		N	pcdh1g2	protocadherin 1 gamma 2	Dr.52488	PCDHGA12		BX119910.7	10
CATGGACTGGGGGCCGAATGCAAAGGT	6M T	1	0	1		Y	pcdh1g18	protocadherin 1 gamma 18	Dr.92801	PCDHGA3		CT737184.6	10
CATGTGGCTGTGAGTGTGGCAGATGTG	2M T	1	1	0		N	pcolceb	procollagen C-endopeptidase enhancer-like	Dr.85065	PCOLCE2		CR318600.13	7
CATGTGGTGGTCCGAGTCCTGATCGTT	2M T	1	1	0		N	LOC794305	proprotein convertase subtilisin/kexin type 6-like	ND	PCSK6		CU856378.10	7
CATGATGGACAGGGATAAAAAGGATGA	6M T	1	0	1		N	pde10a	phosphodiesterase 10A	Dr.117457	PDE10A		BX323866.5	13
CATGAGCTGATAGCTGCAGATCGCTAC	2M T	1	1	0		N	pde5ab	phosphodiesterase 5A, cGMP-specific, b	Dr.91637	PDE5A		BX663604.9	7
CATGTGAACGAATAAACACATTGAAAC	2-6M T	1	14	2		N	pde6c	phosphodiesterase 6C, cGMP-specific, cone, alpha prime	Dr.117127	PDE6C		AL929469.10	12
CATGCACTTTGCTCACCCTGTTCCTCT	2M T	1	1	0		N	pex14	peroxisomal biogenesis factor 14	Dr.4909	PEX14		CR677513.9	23
CATGTACAGAGCGAGAGCTGCGCAAGA	6M T	1	0	1	No hits		si:ch211-8a9.3	piggyBac transposable element-derived protein 5	Dr.117573	PGBD5		AL772289.10	13
CATGCAAAATGGAGGACTCACACACAG	6M T	1	0	1		N	phlda3	pleckstrin homology-like domain, family A, member 3	Dr.120320	PHLDA3		CT025929.13	23
CATGAACACCGAGCTGGGCTCACTGCT	6M T	1	0	1		N	LOC100536536	PH domain leucine-rich repeat protein phosphatase 1-like	Dr.155725	PHLPP1		NW_003334122.1	2
CATGGAGAGCTGTTCGGCCTGAAGCAG	2M T	1	1	0		N	r3hdml	R3H domain containing-like (peptidase inhibitor 15)	Dr.110844	PI15		CR318614.7	23
CATGCTCTTGGTTCTGTATTACACTCT	6M T	1	0	1		N	piezo2	piezo-type mechanosensitive ion channel component 2-like	ND	PIEZO2		NW_003336086.1	24
CATGAACCTGCAGATCTCCAACAGAGC	6M T	1	0	1		N	LOC100001870	sim to modular domain immune-type receptor 3	Dr.114077	PIGR		BX677667.10	2
CATGGAGAGTAGCTCAAAAGAGGCAGT	6M T	1	0	1	MULT		LOC100148673	serine/threonine-protein kinase pim-3-like	Dr.157958	PIM1		CR855338.5	11
CATGTTCTCGCTGAGGGTTCCTAAGTG	2M T	1	1	0	No hits		LOC100538143	proto-oncogene serine/threonine-protein kinase pim-1-like	ND	PIM1		BX005314.35	6
CATGCGTGGACCTGACTTCCCAGTGTT	6M T	1	0	1	NORM		agbl2	ATP/GTP binding protein-like 2	Dr.86454			CR376836.6	25
CATGTCATTCCAAACCCCTCAGATCTT	6M T	1	0	3	MULT		LOC103909431, LOC103911714	sim to PIM2 | pim-2 oncogene	Dr.116850	PIM2		BX511100.26	10
CATGATTGGGGCTGGTGCTCTTGCTCT	2M T	1	1	0	MULT		LOC100537236	serine/threonine-protein kinase pim-2-like	ND	PIM2		CR854927.24	16
CATGGACTGGACAGCCACTGTTGTTTG	2M T	1	1	0	No hits		LOC561965	serine/threonine-protein kinase pim-3-like	ND	PIM2		BX649508.10	2
CATGACAGCAACCCTGTGCCACCTCAA	6M T	1	0	1	MULT		LOC564787	sim to PIM2 | pim-2 oncogene	ND	PIM2		CR769774.8	2
CATGCTAACACCAGTGGCCTCACCACT	2-6M T	1	4	111	MULT		LOC100000086	serine/threonine-protein kinase pim-3-like	ND	PIM3		CR450827.5	7
CATGCTAACACCAGTGGCCTCACCACC	2-6M T	1	6	164	MULT		LOC100000384; Dr.151514	sim to PIM3 | pim-3 oncogene	Dr.151514	PIM3		CR450827.5	7
CATGGATGTCACCCTGATTGACTTTGG	6M T	1	0	2	No hits		LOC100538202	sim to PIM3 | pim-3 oncogene	ND	PIM3		CR388046.14	7
CATGACTACAGCCCGGCTCAGCAGAGA	6M T	1	0	1		N	si:ch211-10j20.5	weak sim to PIM3 pim-3 oncogene	ND	PIM3		BX119915.8	20
CATGTAATAGTTTGGGACATCCAGACA	2M T	1	1	0		N	LOC565697	polycystin-1-like	ND	PKD1		BX510316.11	12
CATGAGCAGACTGGGCCTGGAGACCAG	2M T	1	2	0		N	pknox1.2	pbx/knotted 1 homeobox 1.2	Dr.78334	PKNOX1		BX470235.7	1
CATGGCGGAGAAATCCACATCCTCATC	2M T	1	2	0	NORM		LOC100330353	plakophilin-3-like	Dr.151934	PKP3		CT485674.13	7
CATGTTGATCCTGAAAGTCCTGCCACA	6M T	1	0	1		Y	cpla2	cytosolic phospholipase a2	Dr.20961	PLA2G4A		CU570979.20	2
CATGTTGTAGAGAAAGTCATAATTCCT	2M T	1	1	0		N	LOC100332119	phospholipase A2, group IVC (cytosolic, calcium-independent)-like	Dr.160134	PLA2G4E		NW_003039439.2	5
CATGGAACTCACAGGAGCCTACACGTC	6M T	1	0	1		N	LOC100538038	secretory phospholipase A2 receptor-like	Dr.98482	PLA2R1		CR792451.27	11
CATGGCCTTCCCGTGAGTGATGATGGG	6M T	1	0	1		Y	LOC100536398	1-phosphatidylinositol-4,5-bisphosphate phosphodiesterase beta-4-like	Dr.139435	PLCB4		NW_003336563.1	7
CATGAAACGTGTTCTGGCATTCAGATA	6M T	1	0	1		Y	si:ch211-260p9.3	sim to PLCG2 | phospholipase C, gamma 2 (phosphatidylinositol-specific)	ND	PLCG2		CU655972.8	18
CATGGAGGACATCACCCAATGAAACAC	6M T	1	0	1			LOC100535478	inactive phospholipase D5-like	ND	PLD5		AL772382.29	6
CATGTTGCGTCTTTTATGAAGTAACGT	2M T	1	2	0			plekho1a	pleckstrin homology domain containing, family O member 1a	Dr.90857	PLEKHO1		BX571688.3	19
CATGCTTGTGAAAGTGAAGCAAACCAA	2M T	1	1	0			zgc:136605	weak sim to PLP2 | proteolipid protein 2 (colonic epithelium-enriched)	Dr.84715	PLP2		AL831748.7	8
CATGCGGATATAAACATCCCGTCTGAG	2M T	1	1	0			pofut2	protein O-fucosyltransferase 2	Dr.79126	POFUT2		BX323586.10	9
CATGACAAAAAGGAAGCCAATGTCAAT	6M T	1	0	1			LOC100003720	weak sim to POLR2M | polymerase (RNA) II (DNA directed) polypeptide M	Dr.88362	POLR2M		CR392043.5	7
CATGCAGGAAAGGGAGATGTGGAGAGG	6M T	1	0	1			LOC100000978	sim to vertebrate polymerase (RNA) III (DNA directed) polypeptide G (32kD) (POLR3G)	Dr.142599	POLR3G		AL929202.6	5
CATGGCAAAGATAAAATAATCCAGTTA	2-6M T	1	3	1			popdc3	popeye domain containing 3	Dr.81159	POPDC3		BX511173.7	16
CATGCTGGACCACCTGACCAAGAAAGA	2-6M T	1	1	1			si:ch211-107n23.1	liprin-alpha-2	Dr.95862	PPFIA2		BX537162.5	4
CATGGTGCAGTGCTTCAGGTGACAGCT	2M T	1	1	0			ppm1nb	protein phosphatase, Mg2+/Mn2+ dependent, 1Nb	Dr.67749	PPM1A		BX248087.9	21
CATGATGACACGCGTGCGGTCCGCGGT	6M T	1	0	1	NORM		ppm1h	protein phosphatase, Mg2+/Mn2+ dependent, 1H	Dr.79638	PPM1H		CR354429.17	25
CATGGTGTAATACTTAGGATCATAACC	6M T	1	0	1			zgc:109984	protein phosphatase 1 regulatory subunit 14C	Dr.109976	PPP1R14B		CR450830.9	23
CATGTTGTTCCCTATTTATACACACAC	6M T	1	0	1			zgc:162989	sim to PPP1R14B protein phosphatase 1, regulatory (inhibitor) subunit 14B	Dr.87045	PPP1R14B		NW_003335576.1	17
CATGAGGGTCAACTACGGCCAGAACAT	6M T	1	0	2			LOC558884	serine/threonine-protein phosphatase 2A 55 kDa regulatory subunit B beta isoform-like	Dr.82652	PPP2R2B		BX005397.20	21
CATGTTCAGGACTCTTCCGCCTTCCTC	2M T	1	1	0			ppp2r5c	protein phosphatase 2, regulatory subunit B', gamma	Dr.103528	PPP2R5C		NW_003040432.1	17
CATGGACCTCCCCAAACCCAAGAAACG	2M T	1	1	0			prcc	papillary renal cell carcinoma (translocation-associated)	Dr.69573	PRCC		BX927401.14	19
CATGAGGTTACAAGAGAGCATTTGAAA	2M T	1	1	0			LOC100004079	PR domain zinc finger protein 8-like	ND	PRDM8		BX323017.6	10
CATGTTCATCATCAAACGGCAGCGTCC	6M T	1	0	1			prkaa2	protein kinase, AMP-activated, alpha 2 catalytic subunit	Dr.118580	PRKAA2		ND	20
CATGAACACAGAGGAGTATCTCTTCCA	2M T	1	1	0			prkcz	protein kinase C, zeta	Dr.77567	PRKCZ		AL935180	8
CATGTTGAGGGTGATGATGTTCCTGAA	2M T	1	1	0			LOC100537865	proline-rich protein 5-like	ND	PRR5		CU856344.18	19
CATGGGTTGGATTCGCGGTCAGGATTT	6M T	1	0	1			LOC799158	neurotrypsin-like	Dr.162199	PRSS12		CU459210.4	12
CATGATGTGCGCTGGTTTATTGCAGGG	2-6M T	1	1	1			LOC571079	serine protease 27-like	Dr.101813	PRSS8		CR792430.32	25
CATGGAGTCCATATCACAAGCCTCATT	2M T	1	1	0			LOC563343	prune	Dr.87378	PRUNE		BX005412.17	16
CATGTAATGTGGTGACCATTCGTGCAC	2M T	1	1	0			LOC100000544	prostaglandin E2 receptor EP3 subtype-like	ND	PTGER3		BX324166.8	6
CATGATCTCCTCCTCAAACCCCTCATC	2M T	1	1	0			LOC100007824	weak sim to PTMA | prothymosin, alpha	Dr.126432	PTMA		CR759843.7	4
CATGTTGAACCCGCGCCGCGACCTTCC	2M T	1	1	0			ptpn21	protein tyrosine phosphatase, non-receptor type 21	Dr.87283	PTPN21		CR759892.20	17
CATGCCGGGCGGCAGCGTGAACATCAC	2M T	1	1	0			LOC563284	sim to PTPRS | protein tyrosine phosphatase, receptor type, S	Dr.143560	PTPRS		NW_003334210.1	2
CATGACACGGCAGTTGAATATGGAGAA	6M T	1	0	1			si:ch211-141e20.2	very weak sim to PVR | poliovirus receptor	Dr.131857	PVR		BX677668.10	9
CATGGACAAAATCATCCTGGCCATCCT	2M T	1	1	0			rab11fip4a	RAB11 family interacting protein 4 (class II) a	Dr.31680	RAB11FIP4		BX537290.9	5
CATGTGTATACACTTTAACAGTACACA	2M T	1	1	0			LOC100007678	ras-related protein Rab-34-like	Dr.119897	RAB34		CR749161.2	21
CATGAACCATAGAGCATCAGCAACAGC	6M T	1	0	1			rab36	RAB36, member RAS oncogene family	Dr.85210	RAB36		BX324123.4	10
CATGAGCATTTGACAAATACCTGGAGG	6M T	1	0	1			ralgps2	Ral-A exchange factor RalGPS2	Dr.17213	RALGPS2		BX942824.13	20
CATGTATTTCAGGATATGGCGACTCTT	6M T	1	0	1			rapgef1a	Rap guanine nucleotide exchange factor (GEF) 1a	Dr.158118	RAPGEF1		CR933523.10	8
CATGGAGGTGGGAAACAAGCTTCTGGA	6M T	1	0	1			rapgef6	Rap guanine nucleotide exchange factor (GEF) 6	Dr.8337	RAPGEF6		NW_003335950.1	21
CATGTTGCGCTGTCGGACTGGACAGAC	2M T	1	1	0			LOC797658	sim to RAS guanyl releasing protein 2	Dr.28739	RASGRP2		CU463038.10	7
CATGACTGTCCAGAACGGCCGGCAGGA	2M T	1	2	0			LOC572157	ras-associating and dilute domain-containing protein-like	ND	RASIP1		CT030207.22	12
CATGAATGATGACGACTCCGATACGGG	2-6M T	1	1	4			rassf10b	Ras association (RalGDS/AF-6) domain family (N-terminal) member 10b	Dr.141008	RASSF10		CT583709.17	7
CATGGCACACTGTTGAAAGCCCAGACG	2M T	1	0	1			LOC100150414	ras association domain-containing protein 5-like	Dr.108297	RASSF5		CT573238.7	11
CATGCAGCCAGCCCTGCCACACACACA	6M T	1	0	1			raver2	ribonucleoprotein, PTB-binding 2	Dr.42200	RAVER2		CR626910.5	6
CATGAAGGGAAGACCAAGAGAAGGGAA	2M T	1	1	0			LOC555579	RNA-binding protein 20-like	ND	RBM20		CR450802.8	22
CATGAGGTACGACTGATGATGCATCCA	6M T	1	0	1			LOC559040	RNA-binding motif, single-stranded-interacting protein 2-like	Dr.87243	RBMS2		CR762474.8	11
CATGAAGGAGACGTGTTTGTGGAGCAG	6M T	1	0	1			dub	duboraya, capZ-interacting protein	Dr.80847	RCSD1		CU694531.8	21
CATGGTTCCAGAAAGCAGGTAAGACAA	6M T	1	0	1			rd3	retinal degeneration 3	Dr.94339	RD3		BX469908.10	20
CATGCCTGGGATGATGAACACGCAGGG	2M T	1	1	0			arid1aa	AT rich interactive domain 1Aa (SWI-like)	Dr.105261	REG1B		BX649265.5	16
CATGCCAGTGTGTGGATCTGACGGCGC	6M T	1	0	1			reln	reelin	Dr.20980	RELN		NW_003335715.1	18
CATGGGTGCTTCCATAAGACACTACAA	2M T	1	1	0			relt	RELT tumor necrosis factor receptor	Dr.83234	RELT		BX323823.14	18
CATGAAAGATTTGAAAAAAAAAAAAAA	2-6M T	1	1	1			zgc:64022	weak sim to RERGL | RERG/RAS-like	Dr.26458	RERGL		BX548249.13	19
CATGGAGAGATTCCACAACTGGAGATA	6M T	1	0	1			rfxank	regulatory factor X-associated ankyrin-containing protein	Dr.92699	RFXANK		BX649643.10	22
CATGAACACACTTGATTGTAGAGCATT	2-6M T	1	2	1			zgc:109913	regulator of G-protein signaling 9-binding protein	Dr.91575	RGS9BP		NW_003039625.1	6
CATGTACCGCAAACGTCTACAGATCCT	6M T	1	0	2			LOC563403	rhomboid family member 1-like	ND	RHBDF1		CR352324.11	12
CATGCATTCCAAAAAAAAAAAAAAAAA	2-6M T	1	179	3			opn1mw1	opsin 1 (cone pigments), medium-wave-sensitive, 1	Dr.81282	RHO		AL732567.8	6
CATGTTAGTAAATACATGAACTAATGG	2M T	1	1	0			rhol	rhodopsin, like	Dr.45096	RHO		AL935040.6	11
CATGTCTTCCAGGAAAGGTCACAAAAC	2M T	1	1	0			rhof	ras homolog gene family, member F	Dr.44139	RHOF		BX005309.14	10
CATGCCTACACTCAGCTCGAAAAGTAG	6M T	1	0	1			rhoj	ras homolog gene family, member J	Dr.87356	RHOJ		BX248118.10	20
CATGTGAAGGAATGCGAAGAGAGCAGC	2-6M T	1	4	3			LOC100005026	RILP-like protein 1-like	Dr.118297	RILPL1		CR522882.5	15
CATGAATGTAATTCCTGTTTAAAATAG	2M T	1	2	0			ripply1	ripply1	Dr.52821	RIPPLY2		BX530030.12	21
CATGAAGGAAGCAGATCTCACATAACA	2M T	1	1	0			si:dkey-147f20.5	weak sim to RNASEH2C | ribonuclease H2, subunit C	Dr.49140	RNASEH2C		CR626866.4	14
CATGGGGCAAGTCTCTCAGCGCACTCT	6M T	1	0	1			si:rp71-45k5.9	E3 ubiquitin-protein ligase RNF19B	Dr.161714	RNF19B		CR753876.17	19
CATGTCCATTGTGAGGAGTGTTGGCTT	6M T	1	0	2			rnf220b	ring finger protein 220b	Dr.111376	RNF220		CT025742.15	8
CATGGTTTCTGAAAGAGGCATCACTTC	6M T	1	0	1			ropn1l	ropporin 1-like	Dr.85577	ROPN1L		CR753885.7	24
CATGCACAAAAAGCACGTTCTGTAATA	2-6M T	1	4	1			rpp30	ribonuclease P/MRP 30 subunit	Dr.80180	RPP30		CU571180.4	12
CATGTTTAGGGTGAACTATCCCTTTAA	2M T	1	1	0			rrh	retinal pigment epithelium-derived rhodopsin homolog	Dr.90167	RRH		CT025771.7	13
CATGTACAGCATATACTTACACAGGGC	6M T	1	0	1			LOC100148286	radial spokehead-like 1-like	Dr.152438	RSPH4A		CR759879.17	5
CATGGCTCACAGGTTCTACAAACTTGT	6M T	1	0	1			LOC100537113	uncharacterized protein K02A2.6-like	Dr.117910	RTL1		BX284636.7	18
CATGAAAGGGCTTCTCCAGGTTACCGT	6M T	1	0	2			LOC795584	very weak sim to RTL1 | retrotransposon-like 1	ND	RTL1		BX927142.17	13
CATGAGATCTAATGTATATAAAACTTG	2M T	1	1	0			rtn4r	reticulon 4 receptor	Dr.30202	RTN4R		CR790366.19	5
CATGGTGGGGAAGATTGAGCCTGTCGT	2-6M T	1	4	6			runx2b	Runt-related transcription factor 2b	Dr.30423	RUNX2		BX510352.17	20
CATGGAGCCCACGCTGAGGATCCTTGC	6M T	1	0	1			ryr2a	ryanodine receptor 2a (cardiac)	Dr.157354	RYR2		NW_003335107.1	12
CATGGAGTTCTGGAATCTGATTGGCAA	6M T	1	0	1			s100a11	S100 calcium binding protein A11	Dr.92711	S100A11		CT573133.5	19
CATGTGCTTAAATAGTTGGCGGTTCAT	2M T	1	1	0			zgc:91957	spermidine/spermine N1-acetyltransferase	Dr.107550	SAT1		NW_001878977.2	5
CATGTTGATGATGAAATGGCAGGGTGA	6M T	1	0	1			LOC557524	serine/threonine-protein kinase SBK1-like	Dr.115839	SBK1		NW_001879296.3	3
CATGTTCAAAATGTGGACTCATAGGGT	6M T	1	0	1			scn4aa	sodium channel, voltage-gated, type IV, alpha, a	Dr.117129	SCN4A		BX323464.18	12
CATGCACACACACACTCCTCCGGCTTT	6M T	1	0	1			scxa	scleraxis homolog A	Dr.134169	SCXA		BX255894.19	19
CATGTCTGTTTATTGCATCTGTCAAAG	6M T	1	0	2			sc:d411	semaphorin-4C	Dr.21131	SEMA4C		CR392037.10	5
CATGATGACCAGCAAGACCAGGCGCCT	2M T	1	1	0			sema5b	semaphorin 5 B	Dr.116501	SEMA5B		BX322793.7	9
CATGTGGTGTGTACGGGAATGAGTGTG	2M T	1	1	0			LOC100537452	semaphorin-7A-like	Dr.125115	SEMA7A		NW_003336420.1	UN
CATGGTAGTAGAGAGCGAGAGTATTGG	2M T	1	1	0			sema7a	semaphorin 7A	Dr.150480	SEMA7A		CR391977.5	25
CATGAGCTTCTCATAGGTCAGTGCCTT	6M T	1	0	1			serpinb1l4	serpin peptidase inhibitor, clade B (ovalbumin), member 1, like 4	Dr.119520	SERPINB2		CU469384.8	16
CATGGATGACCCTGAGTCCTTCTTACG	2M T	1	1	0			si:dkey-174e3.3	sim to SERTAD4 | SERTA domain containing 4	Dr.139141	SERTAD4		BX649520.20	13
CATGTTTTATCCAAAAAAAAAAAAAAA	2M T	1	8	0			sgcd	sarcoglycan, delta (dystrophin-associated glycoprotein)	Dr.79171	SGCD		BX294656.8	21
CATGGGGTGAAGAACTGCCAGGATGAG	6M T	1	0	2			LOC556439	sphingosine-1-phosphate phosphatase 1-like	ND	SGPP1		BX255914.3	20
CATGAAGAACGGGAAAAACGAGATGTA	6M T	1	0	1			sgpp1	sphingosine-1-phosphate phosphatase 1	Dr.112353	SGPP1		BX284635.4	13
CATGAGCTAACAATGAACTACTGTATT	2-6M T	1	1	1			si:dkey-11p10.10	SH2 domain-containing protein 1B	Dr.74777	SH2D1B		CR383672.6	24
CATGCCTGCTCTTCTCGCGTAAATCCA	2M T	1	1	0			sh3bp5a	SH3-domain binding protein 5a (BTK-associated)	Dr.119468	SH3BP5		NW_003040576.2	19
CATGTCTGAGGAAGACTCTGAGACTCA	6M T	1	0	1			sh3bp5b	SH3-domain binding protein 5 (BTK-associated)	Dr.78598	SH3BP5		CT867953.11	16
CATGGCAGGTGGCAAGGTGACTGTATA	2M T	1	1	0			LOC100535256	sim to SHANK3 SH3 and multiple ankyrin repeat domains 3	Dr.154834	SHANK3		CR318588.10	18
CATGAGATTGAAGGAGCACACCTGCCT	6M T	1	0	1			shank3b1	SH3 and multiple ankyrin repeat domains 3b	Dr.133371	SHANK3		BX465859.13	4
CATGAAGACCGCAAGAATGAAGGAGCT	2M T	1	1	0			shprh	SNF2 histone linker PHD RING helicase	Dr.162409	SHPRH		BX296541.5	17
CATGGAGAGAAACACTCTGATCCTGTG	2M T	1	11	0			LOC100148735	b-cell receptor CD22-like	ND	SIGLEC1		BX927068.14	1
CATGAAATACAGCACTCTGAGGCTGGT	6M T	1	0	3			sik2a	salt-inducible kinase 2a	Dr.146492	SIK2		BX950179.6	5
CATGAGCTTGAACAAGTTGAGTCGGAG	2M T	1	1	0			nitr5	novel immune-type receptor 5	Dr.36848	SIRPB1		AL591476.7	7
CATGAAAAAGTGCGATTCAAATCATCT	6M T	1	0	1			six2b	sine oculis-related homeobox 2b	Dr.135635	SIX2		CR932018.11	12
CATGAGGGCACACAGGAGGAGCCACAG	6M T	1	0	1			LOC100007653	ski-like protein-like	ND	SKIL		BX649311.10	2
CATGGCAAAAGTCTCTGTAGCAAACAG	2-6M T	1	1	1			skiv2l	superkiller viralicidic activity 2	Dr.77337	SKIV2L		BX537337.9	19
CATGCAAGTATGATGAAAGCGTCACCA	2M T	1	1	0			si:ch211-132g1.3	very weak sim to SLAMF9 | SLAM family member 9	Dr.11174	SLAMF9		CU185242.13	1
CATGATCAGACATACTGTGAAAATTTC	2M T	1	1	0			slc12a10.2	solute carrier family 12 (sodium/potassium/chloride transporters), member 10.2	Dr.88115	SLC12A3		CR383683.17	7
CATGAACCTCACCCGTGCGCAGATGAC	6M T	1	0	1			slc1a4	solute carrier family 1 (glutamate/neutral amino acid transporter), member 4	Dr.77685	SLC1A4		AL772154.4	13
CATGTGGTTTACTCGTCTCTCGCCCTG	2M T	1	1	0			LOC100329905	solute carrier family 22 member 17-like	Dr.126479	SLC22A17		CU633479.20	24
CATGAGGGAGTCGGGACGCTGTGGAAC	2M T	1	1	0			LOC566378	peroxisomal membrane protein PMP34-like	Dr.87212	SLC25A17		NW_003039361.1	3
CATGTGCTTTACTCAGTGTTAAATGCT	2M T	1	1	0			slc25a29	solute carrier family 25, member 29	Dr.47245	SLC25A29		CU682359.9	17
CATGCCCGAGTCCCTCAAGAGGAAGAT	2-6M T	1	7	115			slc25a3a	solute carrier family 25 (mitochondrial carrier; phosphate carrier), member 3, like	Dr.81977	SLC25A3		BX649476.3	4
CATGATAATGGCTATTTGTGCTGTACC	2M T	1	2	0			slc2a10	solute carrier family 2 (facilitated glucose transporter), member 10	Dr.86341	SLC2A10		CU928126.7	11
CATGCCGAGCAGACCCAAAACAGTCCC	6M T	1	0	1			LOC555288	UDP-galactose translocator-like	Dr.153976	SLC35A2		AL590148.8	8
CATGTCTCCTGTGACGTGTGCTAAAAG	6M T	1	0	3			slc35d1a	solute carrier family 35 (UDP-glucuronic acid/UDP-N-acetylgalactosamine dual transporter), member D1a	Dr.79767	SLC35D1		BX323033.6	6
CATGTATTAATTTTAAAAAAAAAAAAA	2M T	1	7	0			slc35g2a	solute carrier family 35, member G2a	Dr.89620	SLC35G2		CR786576.5	2
CATGTTCTGCCAGAGATCAACAGCAGA	6M T	1	0	1			LOC571446	zinc transporter ZIP9-B-like	Dr.100042	SLC39A9		CU695232.10	13
CATGTGCCATTCAGACTCTCGCTAAAA	2M T	1	1	0			slc3a1	solute carrier family 3, member 1	ND	SLC3A1		CT030019.9	13
CATGTGATGTACAGATTAAGCCTCAAA	2M T	1	5	0			slc45a2	solute carrier family 45, member 2	Dr.38928	SLC45A2		BX004847.31	21
CATGGATCCGCCAGCATCATCACTCAG	6M T	1	0	1			slc45a3	solute carrier family 45, member 3	Dr.158728	SLC45A3		BX248577.16	11
CATGTCCTGCTCCTCGGTGTCTGCCAC	6M T	1	0	1			LOC100329687	solute carrier family 45 member 4-like	ND	SLC45A4		NW_003335747.1	19
CATGCTCCAATTGTCCTTCAAACTTGC	2-6M T	1	2	1			LOC100002406	thymic stromal cotransporter homolog	Dr.116585	SLC46A2		AL935311.10	10
CATGATGAAGATTATTGGCTGGTTTTG	6M T	1	0	1			slc5a2	solute carrier family 5 (sodium/glucose cotransporter), member 2	Dr.80948	SLC5A2		CR749778.14	15
CATGTTCTTCTCTACCAAAGGCAACAT	2-6M T	1	1	1			slc6a1	solute carrier family 6 (neurotransmitter transporter, GABA), member 1	Dr.119669	SLC6A1		CR751234.13	4
CATGTTTGCAATGGCTTCTGGGTATGT	6M T	1	0	1			slc6a4b	solute carrier family 6 (neurotransmitter transporter, serotonin), member 4B	Dr.103082	SLC6A4		BX323811.14	5
CATGCTCTGCATCCCCGTCAGCCTCGT	6M T	1	0	1			slc6a8	solute carrier family 6 (neurotransmitter transporter, creatine), member 8	Dr.52830	SLC6A8		BX284664.8	8
CATGGTCCAGGGCTGGCATTTGTGGCC	2M T	1	1	0			slc6a9	solute carrier family 6 (neurotransmitter transporter, glycine), member 9	Dr.77567	SLC6A9		BX649271.5	2
CATGGCACAATTGAAAAGCAGAGCAGG	2M T	1	1	0			slc7a6	Solute carrier family 7 (cationic amino acid transporter, y+ system), member 6	Dr.115757	SLC7A6		CU464087.6	7
CATGCACTTGCATTGTTTCTTATAGTC	2-6M T	1	2	1			slc9a2	solute carrier family 9 (sodium/hydrogen exchanger), member 2	Dr.112672	SLC9A2		CT030738.8	9
CATGGTTCATCAGCTTTTGAGGTGTTG	6M T	1	0	1			slco3a1	solute carrier organic anion transporter family, member 3A1	Dr.82736	SLCO3A1		BX901968.13	18
CATGTAGATAGGGTTTTGACACATCTG	6M T	1	0	1			slitrk2	SLIT and NTRK-like family, member 2	Dr.139401	SLITRK2		CR762422.23	14
CATGGTCACTAAGGCAGCGCATCCACA	6M T	1	0	1			LOC100151181	mothers against decapentaplegic homolog 4-like	Dr.161069	SMAD4		CR854916.10	16
CATGCCTATATCTGACCCACAACCTCT	2M T	1	1	0			LOC100538172	mothers against decapentaplegic homolog 4-like	ND	SMAD4		NW_003334353.1	5
CATGGGGTCTGGCTTTCTGCCCATCAC	6M T	1	0	1			smtnl	smoothelin, like	Dr.92765	SMTNL2		BX004802.12	15
CATGGATGGGAAAAAAAAAAAAAAAAA	2-6M T	1	27	1			sncgb	synuclein, gamma b (breast cancer-specific protein 1)	Dr.82841	SNCA		CR932078.6	12
CATGTTAAACCTCTGAAGAACAACAAA	2M T	1	1	0			sncga	synuclein, gamma a	Dr.37702	SNCG		BX005174.12	13
CATGGGACCATCATCCTCAGAGTCTTC	6M T	1	0	1			sned1	sushi, nidogen and EGF-like domains 1	Dr.74709	SNED1		BX890577.6	6
CATGAACAGTGAGAAACCCCGGTCTAT	2M T	1	1	0			LOC100332905	alpha-1-syntrophin-like	Dr.151783	SNTA1		NW_003334483.1	6
CATGATGGCTAAAATCGCAGAGTCTTA	2M T	1	1	0			snx33	sorting nexin 33	Dr.90996	SNX33		CR354425.7	25
CATGCCCAAACCTGGCTGTGTCATTCA	6M T	1	0	1			sobpa	sine oculis binding protein homolog (Drosophila) a	Dr.117591	SOBP		CU019663.8	13
CATGGTGTGTGTGTGTTGTGTGCACTG	2M T	1	1	0			LOC556262	VPS10 domain-containing receptor SorCS3-like	ND	SORCS3		BX005375.9	17
CATGTCCTCCGATTTACCCGACTGAGA	2M T	1	1	0			im:7135957	sim to SORL1 sortilin-related receptor, L(DLR class) A repeats containing	Dr.41568	SORL1		BX663519.12	15
CATGGTCTAAATAAAATTGGAGAAAAA	2M T	1	1	0			sox1a	SRY-box containing gene 1a	Dr.6453	SOX1		BX649266.9	9
CATGTGAAAAAATGATCTTTCAAATGA	2M T	1	2	0			sox32	SRY-box containing gene 32	Dr.133216	SOX17		CU681855.9	7
CATGTGGAGGATCTGTGTGTGTTTCAG	6M T	1	0	1			sox9b	SRY-box containing gene 9b	Dr.114501	SOX9		CU855796.9	3
CATGCATAGATTCTGGCGCTGTGTGTT	6M T	1	0	1			LOC796843	autoimmune regulator-like	Dr.89759	SP100		BX569789.4	3
CATGATTGACAAGAATGTCTAGGGTAT	6M T	1	0	1			sparcl1	SPARC-like 1	Dr.92040	SPARC		FP102961.6	1
CATGATCGCTAAAGCACTGGCCAACGA	6M T	1	0	1			LOC100332622	spermatogenesis-associated protein 5-like	Dr.162253	SPATA5		NW_003335260.1	14
CATGCACATCTGGACATATGGAAATCA	6M T	1	0	1			LOC100003543	SAM pointed domain-containing Ets transcription factor-like	ND	SPDEF		CU855791.5	6
CATGTCTTCTCCACAGCTGTCTCTGTC	6M T	1	0	1			specc1lb	sperm antigen with calponin homology and coiled-coil domains 1-like b	Dr.87335	SPECC1L		CU570693.4	21
CATGTGCTCCACTGCTTTGCCAATCAT	2M T	1	1	0			LOC792822	spindlin-Z-like	Dr.116594	SPIN1		CU856539.6	10
CATGTCCAGCTTGTTGAACATCCAGCC	2M T	1	1	0			LOC100331540	testican-1-like	ND	SPOCK1		NW_003335279.1	14
CATGAAATGAAAGACTTTTTCCACTAT	2-6M T	1	1	1			spry1	sprouty homolog 1	Dr.117699	SPRY1		AL929558.13	14
CATGTCCTGGATGGTAGTAAGTGTCGC	2M T	1	1	0			srgap1	SLIT-ROBO Rho GTPase activating protein 1	Dr.94242	SRGAP1		CT573465.9	18
CATGAGGACCACATAAACGGGATGGGC	6M T	1	0	1			srgap3	SLIT-ROBO Rho GTPase activating protein 3	Dr.110857	SRGAP3		CR847825.6	6
CATGTGATCACTCCAGTGAAGCGAAGG	2M T	1	1	0			ssbp3a	single stranded DNA binding protein 3a	Dr.79227	SSBP3		CR936461.6	2
CATGCAGGATTTTGTTTGCGATGGAAA	6M T	1	0	1			LOC557248	suppressor of tumorigenicity 14 protein homolog	Dr.156330	ST14		CR848678.11	9
CATGTTGAGTTGACCTTTGTACAGCCA	6M T	1	0	1			si:ch211-51n14.1	sim to ST6 (alpha-N-acetyl-neuraminyl-2,3-beta-galactosyl-1,3)-N-acetylgalactosaminide alpha-2,6-sialyltransferase 1	Dr.90052	ST6GALNAC1		CR383677.15	12
CATGGCTTCAGATTCGGCTCGTGTTTT	6M T	1	0	1			si:dkeyp-110e4.11	sim to STARD10 | StAR-related lipid transfer (START) domain containing 10	Dr.152374	STARD10		BX323077.15	14
CATGGCTTTCCTAAAATCTTCCGGAGG	2M T	1	1	0			stim1b	stromal interaction molecule 1b	Dr.150824	STIM1		BX511168.4	21
CATGTATACTGTGTGGTAAATGGTAGG	6M T	1	0	1			stk35	serine/threonine kinase 35	Dr.76552	STK35		CR318669.18	23
CATGATTGACAGCTGCCTTCCCCTCTT	6M T	1	0	1			LOC100329854	STE20/SPS1-related proline-alanine-rich protein kinase-like	Dr.95086	STK39		NW_003334777.1	9
CATGTAATTAGTAAAAGAAAATGGACA	6M T	1	0	1			stmn4l	stathmin-like 4, like	Dr.82837	STMN4		BX294375.7	17
CATGCAATACAAGTAGTCATATGAAGA	6M T	1	0	1			LOC100329295	syntaxin-19-like	ND	STX19		CU179731.12	9
CATGTCTGTGGATGGTGGGAGAAAAAA	2M T	1	1	0			sult1st7	sulfotransferase family 1, cytosolic sulfotransferase 7	Dr.158800	SULT1A1		AL935148.22	8
CATGGTCAGGTGCAAGTCTAAGGGAGG	2M T	1	1	0			suox	sulfite oxidase	ND	SUOX		CU633810.6	11
CATGTGGACCAGACGGCCAATGGCAAA	2M T	1	1	0			LOC100329788	sushi, von Willebrand factor type A, EGF and pentraxin domain-containing protein 1-like	Dr.94222	SVEP1		CU929190.6	23
CATGTCTTTCTGACGTGACTTTAACTT	6M T	1	0	1			sycp3l	synaptonemal complex protein 3 like	Dr.15474	SYCP3		CR385081.7	25
CATGTCTGACAGGTATCGTATGTGGGT	2M T	1	1	0			syn1	synapsin I	Dr.23828	SYN1		CR376723.15	8
CATGTCAAAAATAGAGAAACCAAAGTC	2M T	1	1	0			synm	weak sim to SYNM | synemin, intermediate filament protein	Dr.83732	SYNM		BX470160.9	18
CATGTGATTGAAGAGTGGAGAGATCTC	2M T	1	1	0			syt8	synaptotagmin VIII	Dr.120839	SYT1		AL923267.1	25
CATGTGCGGGCACGTCAAAGGGGAAGG	2-6M T	1	1	3			LOC561429	synaptotagmin-7-like	ND	SYT7		CU855880.18	25
CATGCGACTGCTATAAGAGCCGTTCAG	2M T	1	1	0			taar14i	trace amine associated receptor 14i	Dr.155287	TAAR1		CT476803.10	20
CATGCCAGATTGAGACGCTCCCCGGTT	2-6M T	1	1	1			tagln3a	transgelin 3a	Dr.115149	TAGLN3		CU861887.12	5
CATGTTAAACAAGGGAGGCTTTCTCTC	6M T	1	0	1			LOC564273	serine/threonine-protein kinase TAO2-like	ND	TAOK2		CT027982.6	12
CATGTCTGAGGTTGCGGTTGACATCGT	6M T	1	0	1			LOC558330	transmembrane anterior posterior transformation protein 1-like	Dr.118075	TAPT1		BX004823.23	14
CATGGCAAGAACAATAGCAGATCCTGA	2M T	1	1	0			tas2r3	taste receptor, type 2, member 3	Dr.142082	TAS2R9		CR933561.8	9
CATGATCTCCTGCACAGTGTTCTGGGG	2M T	1	1	0			LOC100332088	TBC1 domain family member 12-like	Dr.117126	TBC1D12		CU459092.9	12
CATGAGACTACTGCAGGATTACCCCAT	6M T	1	0	1			tbc1d13	TBC1 domain family, member 13	Dr.89520	TBC1D13		NW_003335887.1	21
CATGGAAACAGCCAACAAGGTGATCGA	2M T	1	1	0			tbc1d22a	TBC1 domain family, member 22a	Dr.81919	TBC1D22B		CT573069.6	4
CATGGCGTCTTTGAAGCCCCAGACCTC	6M T	1	0	1			LOC100536073	TBC1 domain family member 24-like	Dr.149920	TBC1D24		CU929145.6	24
CATGTGGTTGGTGGTGAGGTACAGCGA	2M T	1	1	0			tbc1d8	TBC1 domain family, member 8 (with GRAM domain)	Dr.116562	TBC1D8		CU914623.4	9
CATGAACTCCAATCCTTCCAGCACTTC	6M T	1	0	1			tbck	TBC1 domain containing kinase	Dr.21853	TBCK		BX537118.12	1
CATGAGGAAAATCGCGAGTTAGGCCTG	6M T	1	0	1			tbr1b	T-box, brain, 1b	Dr.10723	TBR1		CU651665.6	9
CATGTCATACATAAAATGAATAATCCA	2-6M T	1	1	1			LOC100149647	tctex1 domain-containing protein 3-like	Dr.92341	TCTE3		BX294095.13	24
CATGGGTAGAAGAAGCTTTAAACCACT	6M T	1	0	1			zgc:165525	sim to TDH | L-threonine dehydrogenase	Dr.134633	TDH		AL772189.7	17
CATGTTGCTACAAAGACCCAAGTAGCA	2M T	1	1	0			LOC100538080	alpha-tectorin-like	Dr.117363	TECTA		CR450815.13	12
CATGAGGAAGAGTTTTCCCAGCACTCC	6M T	1	0	2			tekt3	tektin 3	Dr.117356	TEKT3		CR293521.11	12
CATGGGTGAGACTGAACGGGTACCGAG	6M T	1	0	1			si:ch211-113e8.3	sim to TESK2 testis-specific kinase 2	Dr.113665	TESK2		AL953865.9	1
CATGTTCTTGATCAGCACCGTACACCT	2M T	1	1	0			tfec	transcription factor EC	Dr.48383	TFEC		BX470140.10	4
CATGGAGATCGTCGGCACACAGGGGAA	2M T	1	1	0			tgfbr1b	transforming growth factor, beta receptor 1 b	Dr.120512	TGFBR1		NW_003040888.2	24
CATGAAAGATGATGTCATCAGAGATCG	2M T	1	1	0			LOC100334928	TGF-beta receptor type-2-like	Dr.119247	TGFBR2		NW_003335735.1	19
CATGAGCAACTGCAGTCTGACCTCTTA	2M T	1	1	0			LOC560446	sim to TGF-beta type II receptor	ND	TGFBR2		BX255930.3	9
CATGGCGCTCGAGTACACATCCGGCTT	6M T	1	0	1			si:ch211-9d9.3	sim to TGM1 | transglutaminase 1 (K polypeptide epidermal type I, protein-glutamine-gamma-glutamyltransferase)	Dr.78708	TGM1		AL929335.9	2
CATGCAGACCTTGAATATAAGAACCAC	2M T	1	1	0			LOC559012	transglutaminase 2-like	Dr.119107	TGM2		BX571681.7	18
CATGTTCTCCTTGCAAAACAGCCTACA	2M T	1	1	0			thbs3b	thrombospondin 3b	Dr.93014	THBS3		CR749746.9	19
CATGAGCAACTGAATATTTATTGCAAA	6M T	1	0	1			adamtsl7	ADAMTS-like 7	Dr.88191	THSD4		BX284619.11	1
CATGGGAAGACTGCCTGTGCGATGGAT	2M T	1	1	0			tie1	endothelium-specific receptor tyrosine kinase 1 (sim to tyrosine kinase with immunoglobulin-like and EGF-like domains 1)	Dr.75821	TIE1		CR936976.15	6
CATGGTGTCTGTCCCAGATCTTTCAGA	6M T	1	0	1			zgc:113263	very weak sim to TINF2 | TERF1 (TRF1)-interacting nuclear factor 2	Dr.91092	TINF2		BX323558.7	4
CATGATCCTCATTTACTTCTACCGACT	2M T	1	1	0			tlcd1	TLC domain containing 1	Dr.36920	TLCD1		CR749178.8	21
CATGGAAATGGACTGGATCGAGCTCTA	2M T	1	1	0			tle1	transducin-like enhancer of split 1 (E(sp1) homolog	ND	TLE4		AL953843.6	22
CATGGAAAAAGGCAAAGACGAAAGAAT	6M T	1	0	2			LOC567237	TMC2 | transmembrane channel-like 2	Dr.124384	TMC2		BX296526.5	5
CATGATCCATAGAATTGAAGGTCAGTT	6M T	1	0	1			LOC100004462	transmembrane channel-like protein 7-like	ND	TMC7		CU929356.7	11
CATGCCAACAGTGTGGAAAGAGCTTCT	6M T	1	0	1			LOC100334742	transmembrane protein 100-like	ND	TMEM100		NW_001878778.3	3
CATGGCATTTCAAAGGCTTGTTCGTTT	6M T	1	0	1			LOC100535763	3’ end of LOC100535763 transmembrane protein 121-like	Dr.117814	TMEM121		BX323810.8	14
CATGAAACAGAGTGACCAGCCTGCAGT	6M T	1	0	2			tmem136	transmembrane protein 136	Dr.32039	TMEM136		BX640535.7	5
CATGGCTGCAAACTTCCTGATGCTCTC	6M T	1	0	1			tmem189	transmembrane protein 189	Dr.91108	TMEM189		BX322655.10	8
CATGTTGCCTACTGAACCCAGGAGAAG	2-6M T	1	1	4			zgc:103561	transmembrane protein 248	Dr.79167	TMEM248		CU929413.5	5
CATGTTCCAATTGTAAATCTCAAAATT	2M T	1	1	0			tmem35	transmembrane protein 35	Dr.43215	TMEM35		CR354605.8	14
CATGAGGGCGAAGCGATCAAAGGGACC	2M T	1	1	0			tmod4	tropomodulin 4 (muscle)	Dr.32606	TMOD4		CT954330.16	16
CATGAAAATTCACTTATTTTTTACTGT	2M T	1	1	0			tmprss13b	transmembrane protease, serine 13b	Dr.10015	TMPRSS13		BX465852.6	5
CATGTCAACATTTACAGGCAGACTGGG	6M T	1	0	1			tmx4	thioredoxin-related transmembrane protein 4	Dr.152500	TMX4		NW_003335583.1	17
CATGCTATGAAGTGTAAAACTCCCGGC	6M T	1	0	1			tnfaip3	tumor necrosis factor, alpha-induced protein 3	Dr.24063	TNFAIP3		BX323887.10	13
CATGCCCAACAGGGGAGGATTCAAACT	2-6M T	1	1	1			tnfrsfa	tumor necrosis factor receptor superfamily, member a	Dr.10712	TNFRSF10A		CU571317.6	21
CATGTCGGAGATGAGAGATGATCGAGG	6M T	1	0	1			LOC100333821	tumor necrosis factor receptor superfamily member 11A-like	Dr.155211	TNFRSF11A		BX927064.8	24
CATGGCAGTGTGTGATTCATCTGTCCG	2M T	1	1	0			LOC798119	tumor necrosis factor ligand superfamily member 14-like	ND	TNFSF14		BX088529.6	3
CATGCAGTATAAGTGAATTGAATAAAC	2M T	1	1	0			tnni2a.2	troponin I, skeletal, fast 2a.2	Dr.133785	TNNI2		CU302206.10	25
CATGTTACAATGGAAAGTTTGAAGCGG	6M T	1	0	1			tnni3k	TNNI3 interacting kinase	Dr.153763	TNNI3K		CR388090.9	8
CATGATTGTTATGAAGCCATTGTTTCA	6M T	1	0	1			tpbgl	trophoblast glycoprotein-like	Dr.25206	TPBG		CU861892.6	19
CATGAAACCGGACGACAAGACATCGCC	6M T	1	0	1			zgc:113278	sim to TRAM1 | translocation associated membrane protein 1	Dr.91132	TRAM1		AL954866.11	23
CATGAAGAAACAAGACAATACGAACAC	2M T	1	1	0			LOC565695	thyrotropin-releasing hormone receptor-like	Dr.116382	TRHR		NW_003336337.1	UN
CATGACACTGACCAGCAGAGCATCTGT	2-6M T	1	1	1			LOC558486	very weak sim to TRIM16 | tripartite motif containing 16	ND	TRIM16		CR354566.8	23
CATGGGTCTGTGCTTCAGGAGCGGGAA	2M T	1	1	0			LOC567706	novel protein similar to H.sapiens tripartite motif-containing	ND	TRIM25		BX323812.10	2
CATGCTGGCTGAAGTGGTGGGGAAACT	2M T	1	1	0			LOC571442	tripartite motif-containing protein 16-like	ND	TRIM25		CR848710.10	2
CATGTGGAGATCTTCACTTTTCTGATC	2M T	1	1	0			btr26	bloodthirsty-related gene family, member 26 (sim to TRIM27 | tripartite motif-containing 27)	Dr.107013	TRIM27		CR853286.10	19
CATGTCTCTAATATTTAATCAGGTTAA	2-6M T	1	2	4			trim35-36	tripartite motif containing 35-36	Dr.73072	TRIM35		CU137686.6	22
CATGTCTCATATCTACTCGTTCACTGG	2M T	1	1	0			LOC100006636	sim to bloodthirsty	Dr.115743	TRIM39		CR318603.8	7
CATGTAGTAATATTGATGGTAATAACT	2M T	1	1	0			LOC100334710	tripartite motif-containing protein 39-like	ND	TRIM39		CU861574.14	19
CATGTTCCACTGAAATACTGGCTTCTG	2M T	1	1	0			LOC565414	tripartite motif-containing protein 47-like	Dr.117576	TRIM47		NW_003040639.2	20
CATGTTGCAACCTAGTCGCCACTCTGT	2M T	1	1	0			LOC570079	e3 ubiquitin/ISG15 ligase TRIM25-like	ND	TRIM47		BX005044.9	2
CATGGAGGAGCTGGCGAAGCTAGTCAG	2M T	1	1	0			trpc6a	transient receptor potential cation channel, subfamily C, member 6a	Dr.48334	TRPC7		AL627325.6	21
CATGGACCGAATGATTGGAACCTGAAC	2M T	1	2	0			tspan17	tetraspanin 17	Dr.138034	TSPAN17		NW_003335313.1	14
CATGGTGATCGGCTGTCTGGGCTGCGT	2M T	1	1	0			zgc:92174	tetraspanin-4	Dr.150529	TSPAN4		NW_003335713.1	18
CATGGGATGGAAGTTTGAAACGGTTGA	2M T	1	1	0			LOC100151477	tetratricopeptide repeat protein 28-like	Dr.112832	TTC28		CU571170.9	10
CATGGAGGTCTCAGATGCTCCAGAGGA	2-6M T	1	2	1			LOC100334230	sim to TTI2 TELO2 interacting protein 2	Dr.116261	TTI2		CU695141.6	8
CATGCAGTCTAAACACCAGCGGAGGAA	2M T	1	1	0			ttll2	tubulin tyrosine ligase-like family, member 2	Dr.119640	TTLL2		AL928995.19	20
CATGCCAACCGCACCGTGTCAGGAGTT	2M T	1	3	0			LOC556314	tweety 1-like	Dr.27291	TTYH3		BX294380.7	3
CATGGGAGGAGCAGCAGTCGGGAGAAG	6M T	1	0	1			LOC100330433	thioredoxin domain-containing protein 11-like	Dr.155844	TXNDC11		CU550701.5	1
CATGTGTTGTCATGGTTTGTCATGGAT	2M T	1	1	0			si:ch211-191i18.2	very weak sim to UBE2G2 | ubiquitin-conjugating enzyme E2G 2	Dr.98532	UBE2G2		CR936363.6	19
CATGTTCACCGCCACCCAAACATCCAA	2M T	1	1	0			LOC556864	ubiquitin-protein ligase E3B	Dr.143568	UBE3B		BX510366.5	5
CATGCTCAGACTTGCTTCTGGGATGAC	6M T	1	0	1			ugt1a6	UDP glucuronosyltransferase 1 family, polypeptide A6	Dr.39930	UGT1A5		AL954329.7	9
CATGAGTAAACTAACAGACAAGATGAG	6M T	1	0	1			LOC100002369	UDP-glucuronosyltransferase 2A1-like	ND	UGT2A1		CT025934.7	5
CATGTAGATTACAGAAGGCCACACAAT	2M T	1	1	0			LOC100332238	interferon-induced very large GTPase 1-like	Dr.140012	URGCP		BX005421.6	3
CATGGAAAAACACTGTCTAGTAAGAGC	6M T	1	0	1			LOC100149276	ubiquitin carboxyl-terminal hydrolase 43-like	Dr.123801	USP43		BX465842.5	3
CATGAGAAGTCCCACCAAGACTAAAGT	6M T	1	0	1			LOC563983	novel protein sim to vertebrate ubiquitin specific protease 43 (USP43)	Dr.119241	USP43		CR788244.9	6
CATGTCCAGACTGACAGGGCTGTTGCT	2M T	1	1	0			usp54a	ubiquitin specific peptidase 54a	Dr.78640	USP54		BX649385.8	13
CATGCCGGAGCCAGAACATCAATGCGG	6M T	1	0	1			vdra	vitamin D receptor a	Dr.81313	VDR		NW_003336065.1	23
CATGGGCGCTGAGGCTGGGATGTTGAC	2M T	1	1	0			vezf1a	vascular endothelial zinc finger 1a	Dr.149303	VEZF1		CT027794.11	10
CATGGCATCTGTCATTTTAAACTTCAT	6M T	1	0	1			vipr2	vasoactive intestinal peptide receptor 2	Dr.81186	VIPR2		BX571689.20	24
CATGTAATTTAAAGATTTACAATGTCA	2M T	1	1	0			nitr13	novel immune-type receptor 13	Dr.112977	VPREB1		AL954843.8	14
CATGGTGGCCGATGTTTGTCCAGAAAT	6M T	1	0	1			LOC100006681	von Willebrand factor D and EGF domain-containing protein-like	Dr.149827	VWDE		CT027647.21	15
CATGGAGGCTCTGCACTTTTACTTATT	2-6M T	1	1	1			wacb	WW domain containing adaptor with coiled-coil b	Dr.162114	WAC		NW_001878729.3	2
CATGGGTAACCACGACTGTCTGCAAAC	2M T	1	1	0			LOC100333125	sim to WD repeat containing planar cell polarity effector	Dr.161278	WDPCP		BX649529.23	17
CATGGGCTACAGAATCAGCGGTCTGAG	6M T	1	0	1			wdtc1	WD and tetratricopeptide repeats 1	Dr.78779	WDTC1		CU861891.39	16
CATGTCTTTTGGACTGTTGTAAATTGA	2-6M T	1	1	2			wfdc1	WAP four-disulfide core domain 1	Dr.91959	WFDC1		CT025859.8	18
CATGGCAGGAGGATGTGGGTTTACTCT	6M T	1	0	1			sb:cb649	weak sim to WIPF3 | WAS/WASL interacting protein family, member 3	Dr.156480	WIPF3		NW_003040588.1	19
CATGGGTCCAAGCACAAGATTTCAGAC	6M T	1	0	1			wnt10a	wingless-type MMTV integration site family, member 10a	Dr.342	WNT10A		CR847976.6	9
CATGGGTGGGAATGACGGAAAGACTCT	6M T	1	0	1			LOC561831	sim to vertebrate wingless-type MMTV integration site family, member 6 (WNT6)	ND	WNT6		CR847976.6	9
CATGTTTTAACGGCGGTCTGTAGATCA	6M T	1	0	1			LOC100329926	WSC domain-containing protein 1-like	Dr.82734	WSCD1		NW_001879054.3	17
CATGGGGGATCAGCAGTATCCCGTTCC	6M T	1	0	1			wt1a	Wilms tumor 1a	Dr.132864	WT1		BX322616.8	25
CATGGTCAAAACAAACTTCGATTAAAA	2M T	1	1	0			wwtr1	WW domain containing transcription regulator 1	Dr.120269	WWTR1		CU468731.16	22
CATGCCGAGGCTCCTCTGAAAGTCATT	2M T	1	1	0			LOC405768	protein kinase Npk	Dr.30505	ZAK		AL929341.4	6
CATGCAGGTGAAGCGGAAAAGAGGGCG	2M T	1	1	0			zbtb24	zinc finger and BTB domain containing 24	Dr.94021	ZBTB24		BX936450.6	17
CATGGACTTTGTCTCAACAAGTGGTTC	6M T	1	0	1			si:ch211-236k19.4	sim to ZBTB26 | zinc finger and BTB domain containing 26	Dr.86719	ZBTB26		BX255921.2	5
CATGAAGTCCAGTATCCTGTGGAACGC	6M T	1	0	1			zbtb44	zinc finger and BTB domain containing 44	Dr.114927	ZBTB44		BX897688.7	5
CATGGGAACAAGGAAGTGTTTTCGTGC	2M T	1	1	0			LOC798235	ribonuclease ZC3H12A-like	Dr.139891	ZC3H12A		CR391998.20	16
CATGTTCTGCATCAGCATTCTTTCACT	6M T	1	0	1			LOC100001188	probable palmitoyltransferase ZDHHC20-like	Dr.110898	ZDHHC2		CR759925.3	24
CATGGCTCGTCCAGTGCACAGCAAGAC	6M T	1	0	1			zfp106	zinc finger protein 106 homolog	Dr.87333	ZFP106		BX322589.16	17
CATGTGCAGAGTGTGGAAAGAGTTTTA	2M T	1	1	0			LOC100151333	zinc finger protein 420-like	Dr.154119	ZFP2		BX640537.18	22
CATGAGGATTCACTCTGGAGAGAAACC	2M T	1	1	0			LOC100149669	weak sim to ZFP62 zinc finger protein	Dr.120918	ZFP62		CU182107.11	4
CATGACACTCGTCTCCGGGAGGAAGAT	6M T	1	0	1			Dr.119246 (CK140439.1)	sim to ZHX2 | zinc fingers and homeoboxes 2	Dr.119246	ZHX2		CU633999.17	19
CATGCACGAGCTGGTCACCCACGTCTC	6M T	1	0	1			zic2a	Zic family member 2 (odd-paired homolog, Drosophila), a	Dr.76889	ZIC2		BX469902.7	9
CATGCACACCTGCAGGGCTCAAAGCAC	6M T	1	0	1			zmat4a	zinc finger, matrin type 4a	Dr.114909	ZMAT4		CR751607.11	5
CATGGACGGCAGAGTGTTCATCCTACC	6M T	1	0	1			LOC100332706	zinc finger MIZ domain-containing protein 1-like	Dr.15130	ZMIZ1		CU611055.2	12
CATGACTTACATCACAACCTGCCAGCC	6M T	1	0	3			Dr.134999 (CN020569.1)	weak sim to ZMYM1 | zinc finger, MYM-type 1	Dr.134999	ZMYM1		CU207253.6	UN
CATGCGCCTTCACCCCCGCGTGCTTCT	6M T	1	0	1			LOC100332787	zinc finger protein 782-like	ND	ZNF135		NW_003334124.1	2
CATGGACACACTATGGCTCACCAACTT	6M T	1	0	2			znf148	zinc finger protein 148	Dr.76709	ZNF148		BX255930.3	9
CATGTGAAACTGGAAACTTGGTTTGCA	6M T	1	0	1			Dr.130039	sim to ZNF154 | zinc finger protein 154	Dr.130039	ZNF154		CU207221.7	22
CATGCACTCAATGTGAGAAGAGTTTCA	2M T	1	2	0			LOC100330140	oocyte zinc finger protein XlCOF6-like	Dr.3195	ZNF180		BX321870.12	4
CATGCACTCAGTGCGGGAAGAGTTTTA	2M T	1	1	0			LOC100332433	gastrula zinc finger protein XlCGF57.1-like	ND	ZNF180		CU207245.7	17
CATGGCAGTTCACAATGAAGACAAGCC	6M T	1	0	1			LOC100534843	oocyte zinc finger protein XlCOF6-like	ND	ZNF180		BX855614.13	4
CATGTGTTGATTAAAGTTTGATGATAG	6M T	1	0	1			LOC100535695	oocyte zinc finger protein XlCOF6-like	ND	ZNF180		CR792418.18	4
CATGCACTCTGTGTGGGAAAAGTATCA	2M T	1	1	0			zgc:173615	sim to ZNF180 | zinc finger protein 180	Dr.150541	ZNF180		CR759907.30	4
CATGCACTAAGTGTGGGAAGAGTTTTA	2M T	1	1	0			LOC100536248	zinc finger protein 729-like (pseudogene)	ND	ZNF208		CR847895.8	4
CATGTGTTGATTAAAGTTTGATGATTG	2-6M T	1	1	1			LOC100536691	zinc finger protein 91-like	ND	ZNF208		BX571664.8	4
CATGCACTCAGTGTGGGAAGAGCTACA	2M T	1	1	0			LOC560099	zinc finger protein 91-like	Dr.161823	ZNF208		BX005085.11	3
CATGGCCAGTCACCCAAGATGGCCCTC	2-6M T	1	2	2			LOC100005963	zinc finger protein 281-like	ND	ZNF281		CR936437.14	3
CATGCGAGTCGGAGAGCTGAAGCAGCA	6M T	1	0	1			LOC570723	zinc finger protein 33A-like	Dr.117417	ZNF300		NW_003334124.1	2
CATGGAGAGGCTTCACACTTAGGAGCT	2M T	1	0	1			Dr.158355	sim to ZNF335 | zinc finger protein 335	Dr.158355	ZNF335		CR388138.29	8
CATGAGGTTTTCCCCAATGGAGGAGGA	6M T	1	0	1			LOC561377	zinc finger protein 91-like	Dr.89079	ZNF345		CU019624.7	13
CATGTGACGCTTTAGAACCTGTTTGGA	2M T	1	1	0			LOC100005958	zinc finger protein 347-like	Dr.120018	ZNF461		CU207221.7	22
CATGTGGAGGGAGAGGGGAGTGGTGGC	6M T	1	0	1			LOC100001152	sim to ZNF479 zinc finger protein 479	Dr.161633	ZNF479		BX572103.8	4
CATGTCAAAGCTGTATTTATAGGGGAA	6M T	1	0	1			si:dkeyp-2e4.5	weak sim to ZNF502 | zinc finger protein 502	Dr.116581	ZNF502		CR786566.25	13
CATGAGGATTCACAGCGGAGAAAGACC	6M T	1	0	1			zgc:113348	zinc finger protein 71-like	Dr.134886	ZNF510		BX890539.20	21
CATGGACAAGGGAAAGAAGAAAGTGCT	2M T	1	1	0			LOC799182	zinc finger protein 521-like	Dr.119525	ZNF521		CU861664.8	20
CATGACGGAGAGTAAATGATCTGATGG	2M T	1	1	0			zgc:174273	sim to ZNF567 | zinc finger protein 567	Dr.159183	ZNF567		CR846087.30	4
CATGAAGAATCACTCAAGAGAGGATCG	2M T	1	3	0			LOC100005001	zinc finger protein 569-like	ND	ZNF568		BX901974.11	4
CATGGCGGACAGAGCTGGCCCGCAGGG	2M T	1	1	0			LOC100149764	zinc finger and SCAN domain-containing protein 12-like	ND	ZNF568		CR774186.13	2
CATGAGGAGTCACACTGGAGAAAAACC	2M T	1	1	0			LOC100149817	zinc finger protein 41-like	ND	ZNF568		BX927130.13	1
CATGCCAACAGTGTGGAAAGAGCTTCT	6M T	1	0	1			LOC100329377	zinc finger protein 84-like	ND	ZNF568		CR388013.21	4
CATGTGTATGGCCTCTCTCCAGTGTGT	2M T	1	1	0			LOC100535851	zinc finger protein 184-like	Dr.79278	ZNF568		BX005380.11	4
CATGTGTATAGCCTCTCTCCAGTGTGA	2M T	1	1	0			LOC100536900	zinc finger protein 84-like	ND	ZNF568		CR293532.12	4
CATGCAAACGGCTTCTTTCCGGTGTGA	6M T	1	0	1			LOC100537428	zinc finger protein 568-like	ND	ZNF568		CU694442.10	4
CATGAGAGCTCACACTAGGGAGAAACC	2M T	1	1	0			LOC100537450	gastrula zinc finger protein XlCGF57.1-like	ND	ZNF568		BX640461.7	4
CATGAAGGTTCACACTGGAGAAAAGCC	2M T	1	1	0			LOC100537600	histone-lysine N-methyltransferase PRDM9-like	Dr.133579	ZNF568		BX004964.9	UN
CATGAAGATGCACTCAAGAGAGGATCC	6M T	1	0	1			LOC796940	zinc finger protein 569-like	ND	ZNF568		BX548067.34	22
CATGCGTCAAGTTTCGCCGGTTGCTGA	6M T	1	0	1			wu:fb96d11	sim to ZNF568 | zinc finger protein 568	Dr.121798	ZNF568		BX000703.15	13
CATGCACAGTGTGTGGTAAAAGTTTCA	2M T	1	2	0			LOC100149401	zinc finger protein 12-like	ND	ZNF569		BX005448.16	4
CATGTGTCTATTAACGTGATATAACTG	2M T	1	1	0			LOC100149922	gastrula zinc finger protein XlCGF57.1-like	ND	ZNF569		BX470259.9	3
CATGATTCACAAATTACATCATCCTTT	2M T	1	1	0			LOC100150608	sim to zinc finger protein 569	Dr.128845	ZNF569		CR925768.9	12
CATGATGATGCTGGTCATTTAGGTTTT	6M T	1	0	1			LOC100535267	sim to ZNF569 | zinc finger protein 569	Dr.117875	ZNF569		CR792416.16	3
CATGTGGACTTTAAGTTTTCTCTCTGT	2M T	1	1	0			wu:fe17e08	sim to ZNF569 | zinc finger protein 569	Dr.80466	ZNF569		NW_003040494.1	17
CATGAAAACTCACACCAGAGAGAAGCC	2M T	1	1	0			zgc:113209	sim to ZNF569 | zinc finger protein 569	Dr.84917	ZNF569		CR847945.11	4
CATGTTGAGTCCTGCGGTGAGTCACGA	6M T	1	0	1			znf574	zinc finger protein 574	Dr.118434	ZNF585B		BX005242.6	15
CATGCACTCAGTGTAGGAAGAGTTTTA	2-6M T	1	4	1			LOC100148312	protein NLRC3-like	Dr.140201	ZNF595		CR792418.18	4
CATGATCTCCTCCTCAAACCCGTCATC	2M T	1	1	0			LOC100536071	zinc finger protein 271-like	ND	ZNF595		CR762475.29	4
CATGAAGATCCACACTGGTGTGAAAAA	2-6M T	1	4	1			LOC100538197	gastrula zinc finger protein XlCGF57.1-like	ND	ZNF595		BX649328.6	4
CATGCATTCAATGTGGGAAGAGTTTCA	2M T	1	1	0			LOC100536526	zinc finger protein 85-like	ND	ZNF595		BX323023.8	4
CATGAGGATCCACACCGGCAAGAAACC	6M T	1	0	1			zgc:113377	sim to ZNF665 | zinc finger protein 665	Dr.118997	ZNF665		CR382385.32	17
CATGTGTCTTGAGAGATTTAAAGTTCT	6M T	1	0	1			Dr.133447	weak sim to ZNF680 | zinc finger protein 680	Dr.133447	ZNF680		BX004964.9	UN
CATGAGAAATAAGATCTTCCTGTGCTT	2M T	1	2	0			zgc:113090	sim to ZNF683 | zinc finger protein 683	Dr.41565	ZNF683		BX571714.7	3
CATGATGCTGGCGTTCTGGGCGGGTCG	6M T	1	0	1			LOC562791	zinc finger protein 532-like	Dr.118517	ZNF687		CR855277.16	16
CATGTGTTCAGTGTGGGAAGAGTTTTA	2M T	1	1	0			LOC100535679	zinc finger protein 721-like	ND	ZNF721		BX640584.10	4
CATGATGTTCCTCCTCTTTAATCTCCT	2M T	1	2	0			zgc:113100	zinc finger protein 570-like	Dr.83943	ZNF79		BX000702.11	3
CATGGCATCGTAATGGAGCCCAACTCT	2M T	1	1	0			LOC568844	zinc finger protein 696-like	Dr.82426	ZNF81		CT867948.10	16
CATGAGAATTCACACCGGAGAAAAGCC	6M T	1	0	1			LOC100005030	zinc finger protein 850-like	ND	ZNF84		FP102097.6	19
CATGCACTCAATGTGGGGAGAGTTTCA	2M T	1	1	0			LOC100537050	gastrula zinc finger protein XlCGF57.1-like	ND	ZNF846		BX936282.10	4
CATGCCCTCAGTGTGGAAAGAGTTTTG	2M T	1	1	0			LOC100331219	zinc finger protein 85-like	Dr.117847	ZNF85		CR356223.21	4
CATGTTGATCCACACTGGAAAGAAACC	6M T	1	0	1			LOC100150439	zinc finger protein 850-like	ND	ZNF850		CR352258.36	3
CATGCACTCTGTGTGGGAAGAGTTACA	2M T	1	1	0			zgc:113407	sim to ZNF850 | zinc finger protein 850	Dr.84180	ZNF850		BX470259.9	3
CATGAATAGGGCCTCTCGTTTGTATGA	2-6M T	1	3	1			LOC100150845	zinc finger protein 850-like	ND	ZNF91		NW_003040764.2	22
CATGAGGGTTCACACCAGAGAGAAGCC	2M T	1	2	0			LOC556648	zinc finger protein 208-like	ND	ZNF91		BX004964.9	15
CATGTAATGCAAATAAAATAAACCTCT	2M T	1	2	0			LOC562872	zona pellucida-like domain-containing protein 1-like	Dr.91836	ZPLD1		CR626889.13	15
CATGACGGAAGACTGAGACCATCGACA	2M T	1	1	0			LOC100149889	oocyte zinc finger protein XlCOF6-like	Dr.140055	ZSCAN2		FP017161.6	20
CATGCTGGTGGTCTCGCGTGGACGTAG	2M T	1	1	0			dlgap3	discs, large (Drosophila) homolog-associated protein 3	Dr.69954	DLGAP3		NW_001877974.3	19
CATGATGAAGCTGAATCAGTCTGTGAG	2-6M T	2	0	2	NORM		mapk8b	mitogen-activated protein kinase 8b	Dr.82505	MAPK8		CR774192.15	12
CATGACCGAGCTGAGGTTCTTGCCATC	2M T	2	1	0		N	pdp1	pyruvate dehyrogenase phosphatase catalytic subunit 1	Dr.78141	PDP1		BX511010.5	16
CATGGCATCTGCAGCTCCTCTTCTCTC	2-6M T	2	1	1		N	ppfibp2b	protein tyrosine phosphatase, receptor-type, F interacting protein, binding protein 2b	Dr.132793	PPFIBP2		CR759887.7	25
CATGCCCAGTCCACCTCAGAAACCCCT	6M T	2	0	1		N	adam12	a disintegrin and metalloproteinase domain 12 (meltrin alpha)	Dr.93016	ADAM12		BX927337.10	17
CATGAGATGCTGAACCAGGGAGGTGCC	2-6M T	2	1	1		N	si:dkey-191m6.4	rho GTPase-activating protein 22-like	Dr.117429	ARHGAP22		CR774192.15	12
CATGTCCAAGAACCTCCTGGAACAAGG	2-6M T	2	1	2		Y	si:ch73-106k19.2	weak sim to GLYATL3 | glycine-N-acyltransferase-like 3	Dr.76337	GLYATL3		CU459094.5	11
CATGTTATAGACTACATTTTGGACCTT	2-6M T	2	1	1		N	id2b	Inhibitor of DNA binding 2, dominant negative helix-loop-helix protein, b	Dr.76468	ID2		AL954721.4	20
CATGTTGGTCTCCTCTCGTTTGCCATC	2-6M T	2	1	5			Dr.156636	sim to A2ML1 | alpha-2-macroglobulin-like 1	Dr.156636	A2ML1		BX901923.6	15
CATGGGAGGTAACAGTGAGAATGGAGC	2-6M T	2	1	1			LOC100004850	serine/threonine-protein kinase LMTK1-like	Dr.149309	AATK		BX547935.12	3
CATGACCTTGCCCAACAGAGACCAACA	6M T	2	0	1			LOC555739	serine/threonine-protein kinase LMTK1-like	Dr.75595	AATK		CU462848.14	12
CATGCGGATCCAGAGTCAACACCTTCA	2M T	2	2	0			LOC100536189	ankyrin repeat and BTB/POZ domain-containing protein 1-like	Dr.85769	ABTB1		CU862015.9	8
CATGTACGCCCACCTGACCTTCTTCCA	6M T	2	0	1			acap2	ArfGAP with coiled-coil, ankyrin repeat and PH domains 2	Dr.120265	ACAP2		BX571973.15	22
CATGAATGTGGAACCAGGAAATCTGTC	2-6M T	2	1	1			aclyb	ATP citrate lyase b	Dr.148537	ACLY		CR847824.8	12
CATGAAGGAAACAAACACCACTGGCTG	2-6M T	2	2	2			adamts3	ADAM metallopeptidase with thrombospondin type 1	Dr.96919	ADAMTS2		CR735104.7	21
CATGCAGTCCTGCAGGGGGAGTCTGCG	2-6M T	2	1	1			zgc:63568	sim to ADH5: alcohol dehydrogenase 5 (class III), chi polypeptide	Dr.83764	ADH5		CT009687.10	14
CATGACCTCAACAACAAACTCAAGATT	2-6M T	2	1	1			LOC556502	ADM-like	Dr.43797	ADM		CU571259.4	7
CATGGCAATTCGTAACTTGGTAACACT	2-6M T	2	6	22			zgc:165571	sim to AGR3 | anterior gradient 3 homolog	Dr.5434	AGR3		BX005108.8	9
CATGTGGAGGTACCAGATATTGACATT	2M T	2	1	0			LOC566639	neuroblast differentiation-associated protein AHNAK-like	Dr.118834	AHNAK		BX511245.6	17
CATGTATATTTGGAGCTCAAGCCAGAA	2-6M T	2	1	1			ak5l	adenylate kinase 5, like	Dr.43065	AK5		AL845516.8	5
CATGACCTCTGACCTCCGCCGCCTCCT	6M T	2	0	1			akap9	kinase (PRKA) anchor protein (yotiao) 9	Dr.106145	AKAP9		CU929446.4	19
CATGAGCGATGTCACCGTCGTCAAGGA	2M T	2	1	0			akt3a	v-akt murine thymoma viral oncogene homolog 3a	Dr.160105	AKT3		BX004881.17	13
CATGCGAGACTGTTTGCTCAGTCTTTG	2M T	2	1	0			si:dkey-265c15.2	sim to ALMS1 | Alstrom syndrome 1	Dr.34542	ALMS1		BX511084.9	13
CATGGTGAAATTTGGCAAGAAACTTGC	2M T	2	1	0			alox5	arachidonate 5-lipoxygenase	Dr.81553	ALOX5		BX927098.24	13
CATGTGGAAGTCCCGCAGCATTGGCCT	2-6M T	2	4	1			c1qtnf3	C1q and tumor necrosis factor related protein 3	Dr.77673	AMACR		BX004847.31	21
CATGATTGGTATTTTTATATACTGTAG	2-6M T	2	1	1			LOC556578	AMP deaminase 3-like	Dr.115964	AMPD3		CU468622.9	7
CATGGAGGCATCTAAAGCTGGTGCATT	6M T	2	0	1			ankef1b	ankyrin repeat and EF-hand domain containing 1b	Dr.104457	ANKRD50		FP016146.8	17
CATGACCTACTGGACAGTTACCCAATA	2-6M T	2	1	2			Dr.79576	sim to ANKRD50 | ankyrin repeat domain 50	Dr.79576	ANKRD50		NW_003335253.1	14
CATGAGAGCTGCGGTGTTGGAGAGAAT	2-6M T	2	1	1			ap1g2 (zgc:153847)	adaptor-related protein complex 1, gamma 2 subunit	Dr.77949	AP1G1		AL772295.6	2
CATGCGGTCGAGGGAGCTCTTCATATT	2M T	2	1	0			appa	amyloid beta (A4) precursor protein a	Dr.79604	APP		NW_001884377.3	1
CATGAGCCAATCAAAACCAGCGATTAT	6M T	2	0	1			arhgap23	Rho GTPase activating protein 23	Dr.117159	ARHGAP23		CT583704.20	12
CATGCGCTCGTTTACAAACTTCCTGAC	6M T	2	0	1			arhgap42a	Rho GTPase activating protein 42a	Dr.6478	ARHGAP42		AL627325.6	21
CATGTGAGAAACTACCAGCAGACAATC	6M T	2	0	1			arhgap44	Rho GTPase activating protein 44	Dr.73420	ARHGAP44		BX682551.5	3
CATGCGGCACTCTCTCTGGGAAACTCT	2-6M T	2	1	1			arhgef25a	Rho guanine nucleotide exchange factor (GEF) 25a	Dr.150000	ARHGEF25		BX539336.7	23
CATGTCCACAGTCCAACACCTCTACGT	2-6M T	2	1	1			LOC558288	rho guanine nucleotide exchange factor 6-like	Dr.106213	ARHGEF6		AL929434.3	14
CATGTCTCTGGAGCTTAATGGAGTCGT	6M T	2	0	1			LOC562799	sim to ARID3A | AT rich interactive domain 3A (BRIGHT-like)	ND	ARID3A		BX323045.14	11
CATGCTCTGCGTCTTCACTGGGTGGAA	2-6M T	2	1	1			atp6v0a2	ATPase, H+ transporting, lysosomal V0 subunit a2	Dr.82857	ATP6V0A2		BX664706.9	10
CATGGCTGACAATGGTTTATATTGAGG	2M T	2	1	0			atxn1a	ataxin 1a	Dr.87340	ATXN1		CR382336.11	19
CATGAAGAGAGACTATTAAAAGTTTTA	2-6M T	2	1	1			LOC100151502	sim to AVPR2 | arginine vasopressin receptor 2	Dr.152964	AVPR2		CR354375.8	23
CATGACCTGTACTATCTGGCCGGCACT	2-6M T	2	1	2			LOC797750	BAH and coiled-coil domain-containing protein 1-like	ND	BAHCC1		NW_003334260.1	3
CATGGGCGTGTTTGGAGTAAATATCTC	2-6M T	2	1	1			bcr	breakpoint cluster region	Dr.93914	BCR		BX248387.4	21
CATGAACACTTTGAGGAACTCAGCAGA	2M T	2	1	0			bnip3la	BCL2/adenovirus E1B interacting protein 3-like a	Dr.37185	BNIP3L		CU929046.13	8
CATGATCTTGAGCGTGCACGAATACTG	2-6M T	2	1	1			brd1	bromodomain containing 1	Dr.91233	BRPF3		CR751234.13	4
CATGATGAAACTCTGTCACGGAAACCT	6M T	2	0	1			btk	Bruton agammaglobulinemia tyrosine kinase	Dr.83181	BTK		BX005218.6	14
CATGTCTCTGGAAAGCCAAAGGGACAC	2-6M T	2	1	1			zgc:153240	sim to C17orf75 chromosome 17 open reading frame 75	Dr.72211	C17orf75		CR450821.7	3
CATGCAAAGAGAGACATTCCATCCTTT	6M T	2	0	1			c1galt1b	core 1 synthase, glycoprotein-N-acetylgalactosamine 3-beta-galactosyltransferase, 1b	Dr.6223	C1GALT1		BX323816.6	6
CATGTTCGACACATCGCCATCGAGCAG	2-6M T	2	2	2			zgc:110006	protein EURL homolog	Dr.87675	C21orf91		BX465844.25	10
CATGAGGCAAAGGGATCAGACGATGCT	2-6M T	2	3	8		Y	cadm3	cell adhesion molecule 3	Dr.42479	CADM3		CR847981.15	2
CATGGCCAATGACAGTGGGACATTAAC	6M T	2	0	1			camsap3	calmodulin regulated spectrin-associated protein family, member 3	Dr.83084	CAMSAP3		BX005479.5	3
CATGACCATCGACTTTGACAACTTTGT	2-6M T	2	1	3			capn2a	calpain 2, (m/II) large subunit a	Dr.32637	CAPN2		CR762439.7	13
CATGAATAACCTGAATGACCCTGACTG	2-6M T	2	2	1			ccdc127	coiled-coil domain containing 127	Dr.86805	CCDC127		BX890617.13	19
CATGAGCCAGAGAGAAGCTCTGATGGC	2M T	2	2	0			LOC100535530	cell cycle progression protein 1-like	ND	CCPG1		NW_003336845.1	UN
CATGATATTCAAGTTTAATAACCCGAG	2-6M T	2	1	1			ccr12.2	chemokine (C-C motif) receptor 12.2	Dr.120511	CCR4		CU467964.6	24
CATGGAGATAAATACTCTGATCCTGTG	2M T	2	8	0			LOC100333105	b-cell receptor CD22-like	Dr.87996	CD22		NW_003334078.1	1
CATGATATTATAGAAATTTTATCAAAA	2-6M T	2	1	1			si:dkey-261h17.1	weak sim to CD34 CD34 molecule	Dr.104822	CD34		CR678070.11	23
CATGACAGCAGACTCTGGTGATTATGA	2M T	2	1	0			si:rp71-36a1.3	very weak sim to CD58 | CD58 molecule	Dr.80757	CD58		BX322587.10	22
CATGGATCTACAGCAGAGACACACAGA	2M T	2	2	0			LOC100007383	weak sim to CD8A | CD8a molecule	Dr.86767	CD8A		CR792453.9	3
CATGGCTCTGGTTGGTGCAGTGAGCAG	2M T	2	1	0			cd99l2	CD99 antigen-like 2	Dr.75649	CD99L2		BX005022.7	7
CATGGTGTTGTCCTCTGCTTTGATCTC	2-6M T	2	1	1			cdadc1	cytidine and dCMP deaminase domain containing 1	Dr.37053	CDADC1		BX294379.5	1
CATGTACTACTTTGCTTTATATCTTGT	2-6M T	2	1	1			cdh6	cadherin 6	Dr.132516	CDH6		CR925777.11	2
CATGTGGGGTGTTGGATGTATATTTTA	2-6M T	2	1	1			LOC798487	cell division protein kinase 17	Dr.84933	CDK17		BX537336.19	4
CATGGAGGACGCAGAGGAGGGTTTCCT	6M T	2	0	2			LOC100535265	cyclin-dependent kinase 2-associated protein 1-like	Dr.134315	CDK2AP1		NW_003334901.1	10
CATGTGGTGAATTTCTTTCTGTTTGGT	2-6M T	2	1	1			cercam	cerebral endothelial cell adhesion molecule	Dr.75368	CERCAM		BX323065.6	10
CATGAAGTATAAGGACCAGATGAAGAA	2-6M T	2	1	1			LOC558613	charged multivesicular body protein 5-like	ND	CHMP5		AL929096.5	2
CATGGAGGCCCCTCTGTCCTACAGCAC	2-6M T	2	1	1			si:ch211-260p9.1	sim to c-Maf-inducing protein	Dr.155532	CMIP		CU655972.8	18
CATGCCTTTGGGTTTCAGCAGGATCTT	2-6M T	2	1	1			Dr.151766	sim to COBLL1 | COBL-like 1	Dr.151766	COBLL1		FP102938.16	9
CATGACTTTATCGAACTCAGGACAGCG	6M T	2	0	1			LOC100536063	sim to COBLL1 cordon-bleu WH2 repeat protein-like 1	Dr.134453	COBLL1		CR396591.13	6
CATGGAGTCGGGAGTCGATGCCCAGCA	2-6M T	2	1	1			creb1b	cAMP responsive element binding protein 1b	Dr.42983	CREB1		CU633914.4	9
CATGGAAGATATGCTGAAATCTTAGTA	2M T	2	1	0			si:dkey-78l4.6	sim to CTSG | cathepsin G	Dr.120173	CTSG		BX936298.17	22
CATGGTCAAGGAAAAAAAAAAAAAAAA	2-6M T	2	1	4			cyp2aa8	cytochrome P450, family 2, subfamily AA, polypeptide 8	Dr.84315	CYP2B6		CU013526.13	23
CATGTAGAGCTGATGACTCGGCTGGAA	2-6M T	2	1	1			daam2	dishevelled associated activator of morphogenesis 2	ND	DAAM2		CU856355.6	17
CATGTCTGGGGGCCGTCTGGGTTTCTG	2M T	2	1	0			daglb	diacylglycerol lipase, beta	Dr.149612	DAGLB		NW_003040019.2	12
CATGACCACTGGATGTACTCCAATCCC	2M T	2	2	0			LOC100535188	drebrin-like	Dr.159997	DBN1		BX927237.15	21
CATGGAGGGAGACCGAGGAGGAGTGGT	2-6M T	2	1	1			LOC100007924	DDB1- and CUL4-associated factor 8-like	ND	DCAF8		CR376839.12	2
CATGAAAACTTCGTCCACAGCGAGACT	2-6M T	2	1	1			si:dkeyp-15g12.1	sim to DEF6 | differentially expressed in FDCP 6 homolog	Dr.114690	DEF6		CR382295.10	4
CATGGGATATCAAAGCCAGCGTATGTG	6M T	2	0	1			LOC565122	diacylglycerol kinase family	Dr.21395	DGKD		CR392038.9	7
CATGGTGGACACGGCCCTCTATGACAA	2M T	2	1	0			dhrsx	dehydrogenase/reductase (SDR family) X-linked	Dr.90214	DHRSX		BX784035.4	1
CATGCTATTCACCCAGAACTGAACACA	2-6M T	2	1	1			disc1	disrupted in schizophrenia 1	Dr.83248	DISC1		CU855775.13	13
CATGTCCAGCCTCAAAGGTTGAAGTTC	2M T	2	1	0			dlec1	deleted in lung and esophageal cancer 1	Dr.133167	DLEC1		CR388015.14	24
CATGTCTGAAAGCTCGTCACTGGGAGA	6M T	2	0	1			dnah6	dynein, axonemal, heavy chain 6	Dr.80776	DNAH6		CR376728.12	1
CATGCACACTGTGTTCTTCGGCCTGCT	2-6M T	2	1	1			dpy19l3	dpy-19-like 3	Dr.130448	DPY19L3		AL935126.18	7
CATGAACTCAGGCCACCGCTGCGAGGT	2-6M T	2	1	1			ece1	endothelin converting enzyme 1	Dr.118133	ECE2		CR626884.13	15
CATGCTTCAATATTCTGCAAAATGTCA	2-6M T	2	1	1			ecscr	endothelial cell-specific chemotaxis regulator	Dr.89544	ECSCR		CU463029.6	21
CATGGAGCCAGTCTACTGGAACACTTT	2-6M T	2	1	1			LOC564234	ephrin-B2-like	ND	EFNB3		AL844597.12	10
CATGAAGGCTGCGCTGGCCGATGTGCT	2-6M T	2	1	1			LOC100334728	echinoderm microtubule-associated protein-like 4-like	Dr.83936	EML4		NW_001877321.2	13
CATGTAAAAATTTATCAACCACAGTAG	2-6M T	2	1	1			LOC100005297	epithelial mitogen-like	Dr.74974	EPGN		BX545917.6	8
CATGGAACGTTACAGAGACAACTTCAC	2-6M T	2	1	1			epha4a	Eph receptor A4a	Dr.47585	EPHA4		FP236331.9	2
CATGAACTCCCGGCTGCCGCAGAGCGT	2-6M T	2	1	1			LOC100329948	epidermal growth factor receptor substrate 15-like 1-like	Dr.49059	EPS15L1		NW_001878728.2	2
CATGAACTCCATTAAGACCTTCTGGAG	2-6M T	2	1	1			LOC100538178	ELKS/Rab6-interacting/CAST family member 1-like	Dr.109882	ERC1		CU695020.16	4
CATGCATCATTTACACAGAAGACCTCT	2-6M T	2	1	1			fam101a	family with sequence similarity 101, member A	Dr.34885	FAM101A		AL590153.9	8
CATGGAGTCCTGTTTCACTGGGTATCT	2-6M T	2	1	1			fam102bb	family with sequence similarity 102, member B, b	Dr.89296	FAM102B		BX571790.8	20
CATGGCCTTTCAGGGGTCCGAGGGACT	2-6M T	2	1	1			fam116aa	family with sequence similarity 116, member A, genome duplicate a	Dr.87880	FAM116A		CU633620.5	11
CATGCACTAAGGACAATTTAGCTTGTT	2-6M T	2	6	1			fam131a	family with sequence similarity 131, member A	Dr.113834	FAM131A		NW_001878657.3	2
CATGTCTCCGGCCAGCCTCTGCACAGC	2-6M T	2	1	2			LOC100003524	protein FAM134B-like	ND	FAM134B		BX323064.13	2
CATGAGGGTCCACAGGGGTGGCTGTTC	6M T	2	0	1			fam151b	family with sequence similarity 151, member B	Dr.86114	FAM151B		BX510923.8	5
CATGTCACAGAAGACTCCGTCTCGGAA	2-6M T	2	1	1			si:dkey-53d10.1	sim to FAM190A | family with sequence similarity 190, member A	Dr.116173	FAM190A		CR626904.15	8
CATGCAGTGGAGGATACACGAATGTTT	2-6M T	2	1	1			inka1a	induced in neural crest by AP2, 1a	Dr.150855	FAM212A		BX530022.5	11
CATGACGGACGGAGAGGACTTGCCATT	6M T	2	0	1			LOC570359	sim to FAM63B | family with sequence similarity 63, member B	Dr.89379	FAM63B		AL935053.6	7
CATGCGATCTTACTAAACACCGCTGCA	2M T	2	2	0			LOC797682	protein FAM69A-like	ND	FAM69A		BX571699.10	6
CATGTGCAATTCTGGAGAACATCTCCG	2-6M T	2	1	5			fam69c	family with sequence similarity 69, member C	Dr.78155	FAM69C		BX784022.6	24
CATGCACGATCACCCAGACAGTGGACT	6M T	2	0	1			LOC568600	protocadherin Fat 3-like	ND	FAT3		NW_001877055.3	10
CATGACACTGAGATAGCATACACAACA	2-6M T	2	1	7			fbp2	fructose-1,6-bisphosphatase 2	Dr.34240	FBP2		CT025745.13	5
CATGTTCTTCAGACTGTGGGCAGTTCA	2-6M T	2	2	1			focad	focadhesin	Dr.153509	FOCAD		CU914308.7	7
CATGAAATGTATGTACAGTATGTCACA	6M T	2	1	2		Y	foxred2	FAD-dependent oxidoreductase domain containing 2	Dr.42037	FOXRED2		CR383684.7	3
CATGAACTGGATTCAATCGTTTTGCTA	2M T	2	1	0			fsd1	fibronectin type III and SPRY domain containing 1	Dr.16576	FSD1		BX247907.8	8
CATGAGCGGCTGGTAATCTTTGGAGCG	2M T	2	1	0			ftsj	FtsJ homolog 3	Dr.16133	FTSJ3		CU498832.4	22
CATGATGTGCTGTACCTGGAGCAGATC	2-6M T	2	1	2			LOC100150934	sim to FUK | fucokinase	Dr.75406	FUK		NW_003336217.1	25
CATGTGGAAGTCAAAGGGCACTACTGG	2-6M T	2	2	1			LOC100329827	glutamate decarboxylase 1-like	ND	GAD1		CR394567.8	9
CATGAAGCCCTGGCAGCCGCTCGGGAA	6M T	2	0	1			LOC793584	galactosylceramide sulfotransferase-like	Dr.116595	GAL3ST1		CU459021.15	10
CATGTTAACTAATCCTAACTTATTGGA	2-6M T	2	1	1			gch2	GTP cyclohydrolase 2	Dr.75259	GCH1		CR385067.9	12
CATGCAGCGGGACACACAAGCCGACAC	2-6M T	2	1	1			gfm2	G elongation factor, mitochondrial 2	Dr.22910	GFM2		BX571730.9	5
CATGTGGTTGATGGTGCTGGTGACTGA	2M T	2	1	0			LOC100333757	gamma-glutamyltransferase 5-like	Dr.94949	GGT5		NW_001878443.3	10
CATGCACTGTGTAAAGCAGCTCTAAGT	2-6M T	2	3	5			ghrh	growth hormone releasing hormone	Dr.74499	GHRH		CR385028.15	11
CATGTTTTGGACTGTACCAAAGCCAAC	2-6M T	2	1	1			LOC100150205	GTPase IMAP family member 8-like	Dr.91615	GIMAP8		CR812472.9	3
CATGACATAATCAAACTTCTCAGCATT	6M T	2	0	2			glsb	glutaminase b	Dr.133134	GLS		BX649377.8	9
CATGCAAGAGGGCGTCGTCAGGGTTGT	2-6M T	2	1	1			gmeb1	glucocorticoid modulatory element binding protein 1	Dr.78512	GMEB1		CR385068.11	19
CATGCACTCTTCACCAGTTTACGCACT	2M T	2	0	1			LOC100004124	sim to GPR1 G protein-coupled receptor 1 40%	Dr.116355	GPR1		FP015853.7	9
CATGCATTCTTGATTGTTAGTGGAGGT	2M T	2	8	0			zgc:171586	weak sim to GPR55 | G protein-coupled receptor 55	Dr.98747	GPR55		CU929402.10	22
CATGTGTTTACTGTGATTTGTAAAGCT	2-6M T	2	1	2			wu:fj63d09	weak sim to G protein-coupled receptor 88	Dr.81494	GPR88		BX908733.15	22
CATGCAAAGGGAAACACCCAACCTGTT	2M T	2	2	0			LOC100004265	sim to GPSM1 | G-protein signaling modulator 1	ND	GPSM1		AL845516.8	5
CATGCAGTGTGCAATCCGAGTCCACTC	6M T	2	0	1			grb10b	growth factor receptor-bound protein 10b	Dr.162267	GRB10		CR478208.14	16
CATGAAAGAATAAAGTTACATTAAACC	2-6M T	2	1	2			grk5	G protein-coupled receptor kinase 5	Dr.18531	GRK5		CT027796.13	10
CATGCATTACCAGGTTGATTAGCAGAA	2-6M T	2	1	1			gsg1l	germ cell-specific gene 1-like protein	Dr.36431	GSG1L		CR792438.14	3
CATGATGCCTTAATACTGTTTGCTGGA	2M T	2	1	0			gypc	glycophorin C (Gerbich blood group)	Dr.162084	GYPC		CR533429.7	9
CATGTCAAGAAACACATTCGAGTTCGT	2M T	2	2	0			LOC100536291	very weak sim to HARBI1 | harbinger transposase derived 1	ND	HARBI1		CR788231.6	6
CATGGTAATATTTAAAGCAGATTTTGG	2-6M T	2	1	1			hecw2	HECT, C2 and WW domain containing E3 ubiquitin protein ligase 2	ND	HECW2		FQ482081.1	1
CATGCAGGAAATTAACCAAACAATAAA	2M T	2	1	0			si:dkey-177p2.16	sim to HERC2 | hect domain and RLD 2	Dr.80052	HERC2		BX248515.4	20
CATGCTCTGCAAGACTACCAGAAGACT	2-6M T	2	1	1			LOC100334116	hepatocyte growth factor-like	Dr.157477	HGF		ND	18
CATGGAGAGTTACTTCAATGACAACCA	6M T	2	0	1			hmbox1a	homeobox containing 1a	Dr.47105	HMBOX1		BX005004.12	17
CATGACACTTATGGGCAAGCACTGGCA	2M T	2	1	0			hmgcl	3-hydroxymethyl-3-methylglutaryl-Coenzyme A lyase (hydroxymethylglutaricaciduria)	Dr.79394	HMGCL		CR391986.5	17
CATGAGGACGGAGAGAGACTCGCTGAA	2M T	2	1	0			LOC100536916	protein Hook homolog 3-like	Dr.79595	HOOK3		NW_003334316.1	5
CATGTACCTCGACCAGGAGCACCACTT	2-6M T	2	1	1			LOC557824	heat shock protein 105 kDa-like	Dr.160608	HSPH1		AL929092.4	15
CATGAGCAGACCGGACTATCCCACTGC	2M T	2	4	0			idua	iduronidase, alpha-L-	Dr.111253	IDUA		AL928901.8	5
CATGCAAATGCCTGTTCATATCTGACT	2-6M T	2	1	2			iffo1a	intermediate filament family orphan 1a	Dr.119294	IFFO1		BX005154.6	19
CATGAAGAGAGGACTGGATGTGCAGAT	2M T	2	6	0			LOC563794	sim to IFFO1 | intermediate filament family orphan 1	Dr.152312	IFFO1		CU861451.4	16
CATGAAATACTGGGATTAATTTATCAA	2-6M T	2	2	3			LOC100001239	interferon-induced protein with tetratricopeptide repeats 5-like	Dr.92790	IFIT5		BX000534.11	12
CATGAATATTCTGTTCTTAATTACTCC	2-6M T	2	1	1			si:dkey-125i10.6	weak sim to IQCD | IQ motif containing D	Dr.91601	IQCD		BX640539.14	5
CATGAACTGCTGTAGTGTTTGCTTTCC	2-6M T	2	1	1			zgc:194423	IQ motif containing K-like	Dr.26788	IQCK		BX470259.9	3
CATGGTTTGCCAAAGTTATTACTGAAA	2-6M T	2	1	2			jam3a	junctional adhesion molecule 3a	Dr.53902	JAM3		CR626890.8	15
CATGAGAGTGATAATGTGGTTTTCTGT	2-6M T	2	1	1			jarid2a	jumonji, AT rich interactive domain 2a	Dr.103290	JARID2		CR391941.10	16
CATGGATGATGAGGAGGAGACGGTGTC	2-6M T	2	1	1			kcna4	potassium voltage-gated channel, shaker-related subfamily, member 4	Dr.115789	KCNA4		CT030129.9	7
CATGGTGAATGTTAAATCCCCCGAACC	2M T	2	1	0			kif20bb	kinesin family member 20Bb	Dr.77947	KIF20B		CU611047.5	12
CATGTATAGCTCAAAAGATCACTTTAT	2M T	2	5	0			klfd	Kruppel-like factor d	Dr.83678	KLF2		BX601645.15	6
CATGGTTTATCTGCGGACTTCACAACA	2-6M T	2	1	1			klf7a	Kruppel-like factor 7a	Dr.92553	KLF7		CU914146.10	1
CATGGACCACAGTGTCCTCTCTGAGCG	2M T	2	1	0			LOC100537743	kelch-like protein 4-like	Dr.79764	KLHL4		NW_003336444.1	UN
CATGAAAGCAGCACTGGAGCACTCACT	2-6M T	2	1	1			zgc:136902	sim to KRT15 | keratin 15	Dr.76263	KRT15		BX324177.48	11
CATGGTGAAAAAAGGGTTCCGTGTGGA	2-6M T	2	1	1			CT611018.2	very weak sim to LINE1 retrotransposable element 2 (26%)	ND	L1RE2		AL845351.6	5
CATGACAGTGGACAACAACAGCTAGCC	2M T	2	1	0			large	like-glycosyltransferase	Dr.91325	LARGE		CU694375.11	4
CATGCACCAAATGAAGAGAGTGAAAAG	2-6M T	2	1	1			AB097142.1	retrotransposon MutsuDr3 (L1-like)	ND	LOC100128274		AL807749.21	4
CATGAACAACAATATTGAGACTCTTGA	2M T	2	1	0			loxl2a	lysyl oxidase-like 2a	Dr.89141	LOXL2		BX294119.5	10
CATGGCTTTGACTGTTGATGGGACATC	6M T	2	0	1			lphn3	latrophilin 3	Dr.16758	LPHN3		BX469934.5	1
CATGAGATTGGTGAGCTGGCCAATGCT	2-6M T	2	1	1			si:ch211-260b17.8	sim to leucine-rich repeats and calponin homology (CH) domain containing 1	Dr.36596	LRCH1		BX323457.7	9
CATGTGAGTGTTAGTGGCAGAAATGGT	6M T	2	0	1			lrguk	leucine-rich repeats and guanylate kinase domain containing	Dr.151541	LRGUK		BX470240.8	4
CATGGTGATGGACGAGCTGCAGAGCCC	6M T	2	0	1			lrp6	low-density lipoprotein receptor-related protein 6	Dr.88486	LRP6		CU856344.3	19
CATGTCCTTGATGAAGCGCACCACCAG	2M T	2	1	0			lrrc58a	leucine rich repeat containing 58a	Dr.83163	LRRC58		CT737229.11	1
CATGTCTGCGCTTCTACGACTGCAGCT	6M T	2	0	6			lrtm2	leucine-rich repeats and transmembrane domains 2	Dr.125990	LRTM2		BX649380.7	4
CATGCACACACACCCTCCACACACTCG	2-6M T	2	1	1			LOC100333113	protein lyl-1-like	Dr.158602	LYL1		NW_003039555.2	6
CATGACGTTAAAGAAACTTGTGATTTA	2-6M T	2	1	1			LOC797545	sim to microtubule-associated protein 1 A	Dr.82663	MAP1B		CR847527.7	25
CATGCAAACACGTCACACAAAATAAAA	2-6M T	2	2	9			marveld1	MARVEL domain containing 1	Dr.88154	MARVELD1		NW_003040134.1	13
CATGGTTCAGTACACAGATCGCCATTT	2-6M T	2	2	1			mboat2a	membrane bound O-acyltransferase domain containing 2a	Dr.135613	MBOAT2		CR383661.10	17
CATGGACTGGAGGAATAATGGGCTGGA	2-6M T	2	1	2			mcf2a	MCF.2 cell line derived transforming sequence a	Dr.158546	MCF2		BX004988.5	14
CATGACCGTGACGGGGGAAAGCAAGGA	2-6M T	2	2	3			mecp2	methyl CpG binding protein 2	Dr.82151	MECP2		CR385024.10	8
CATGCTAGATTTTGCATACAGCTCATA	6M T	2	0	1			mgat3	mannosyl (beta-1,4-)-glycoprotein beta-1,4-N-acetylglucosaminyltransferase	Dr.42251	MGAT3		BX085195.5	3
CATGGAACTGTTGCCACTGCGATTGTT	6M T	2	0	1			mgat4a	mannosyl (alpha-1,3-)-glycoprotein beta-1,4-N-acetylglucosaminyltransferase, isozyme A	Dr.149572	MGAT4A		AL772133.30	9
CATGCAGGAGTGGGTGTGAAGCGGACC	2-6M T	2	1	1			mmp16a	matrix metallopeptidase 16a (membrane-inserted)	Dr.92939	MMP16		CT737162.7	24
CATGAAGCTCCTCGATCAAAAAAAAAA	2-6M T	2	1	1			zgc:92512	sim to MOB2 | MOB kinase activator	Dr.32034	MOB2		CR759741.10	25
CATGCCTTTTAATGGTAACAGATGGAA	2-6M T	2	1	1			mocs1	molybdenum cofactor synthesis step-1	Dr.90606	MOCS1		CR381689.12	17
CATGAACGGATATGTGACCGAGTCAGA	2-6M T	2	1	1			mpp5a	Membrane protein, palmitoylated 5a (MAGUK p55 subfamily member 5a)	Dr.18838	MPP5		BX679675.28	17
CATGAAATCTAAAGGATGGAAATAAGG	2-6M T	2	1	1			mpzl1l	myelin protein zero-like 1 like	Dr.84173	MPZL1		CU469093.5	10
CATGCGGTCCATCAGTATGTTGACGTT	2M T	2	3	0			LOC563036	weak sim to MR1 | major histocompatibility complex, class I-related	Dr.158320	MR1		CU394254.10	3
CATGCTTTCAACATCCTCCTGCAGAAA	2-6M T	2	1	1			LOC798290	weak sim to MS4A4A | membrane-spanning 4-domains, subfamily A, member 4A	Dr.29846	MS4A4A		CR762404.6	4
CATGCGCCACCTAGAGCTGTGGGTCAC	2M T	2	1	0			mtm1	myotubularin 1	Dr.76872	MTM1		BX005022.7	7
CATGATAAGTAGAGAAACATCAGTGTG	2-6M T	2	2	1			musk	muscle, skeletal, receptor tyrosine kinase	Dr.80352	MUSK		AL603785.4	10
CATGAGAAGGAAAATGCACTGAATATT	2-6M T	2	1	1			myo10	myosin X	Dr.116390	MYO10		BX511126.10	9
CATGATTGGTCTCGAGTCGCTGGCGGA	2-6M T	2	1	1			myo3b	myosin IIIB	Dr.158373	MYO3B		CU855921.3	9
CATGCCCTGATCCCGGTCTGAAGCTGT	2-6M T	2	1	1			myoc	myocilin	Dr.77862	MYOC		NW_003049754.1	20
CATGGCTAAGAAGGGCTCATCAGATTT	6M T	2	0	1			wu:fi38e05	sim to MYOM2 | myomesin (M-protein) 2, 165kDa	Dr.77971	MYOM2		CR847973.9	11
CATGTCTCCTGAACCTGAATATCAGAA	2-6M T	2	1	1			myrip	myosin VIIA and Rab interacting protein	Dr.120528	MYRIP		CR753886.11	24
CATGACGCCGCAGCGCAGGACAGACTT	2-6M T	2	1	1			LOC564685	sim to NGFI-A binding protein 1 (EGR1 binding protein 1) (NAB1)	Dr.144264	NAB1		BX649377.8	9
CATGTGAAAATAGTCGTCAGTCTTCAA	2M T	2	1	0			nav2	neuron navigator 2	Dr.135055	NAV2		BX890598.10	7
CATGCTCACTGGTAAATATGGGGGCCT	2M T	2	1	0			nck1a	NCK adaptor protein 1a	Dr.110655	NCK1		CR788256.3	2
CATGCCTTATGTTTGCGCTTGGCAGGG	2-6M T	2	1	1			neflb	neurofilament, light polypeptide b	Dr.162322	NEFL		BX005158.8	8
CATGCACAGCCAAAACTGAGATAGACG	6M T	2	0	1			nfasca	neurofascin homolog (chicken) a	Dr.122597	NFASC		CR354444.17	11
CATGGTGTTGGCAGGAACAGGGAAGGC	2M T	2	1	0			LOC100535163	NHL repeat-containing protein 2-like	Dr.134216	NHLRC2		CU695011.13	12
CATGAAATGTAATCCAAGAAAACAGAG	2M T	2	1	0			LOC100329480	protein NLRC3-like	ND	NLRC3		NW_003334998.1	11
CATGGAAACTCTCTGAAAAGCCCCTGT	2-6M T	2	1	1			LOC555438	NACHT, LRR and PYD domains-containing protein 12-like	ND	NLRC3		NW_001878922.3	4
CATGATCGATTTCCTGAAGACTGCAGT	2-6M T	2	2	1			si:ch211-207e19.2	weak sim to NLRC3 | NLR family, CARD domain containing 3	ND	NLRC3		BX469933.14	4
CATGTGCCACATACCTGTCTTCTGCTG	2-6M T	2	1	1			LOC100148781	NACHT, LRR and PYD domains-containing protein 12-like	ND	NLRP12		BX649328.6	4
CATGATTGAGATGTCAGAGGAGCCGGT	2-6M T	2	7	3			LOC798303	NACHT, LRR and PYD domains-containing protein 12-like	ND	NLRP12		CR388228.31	13
CATGCAGCTGAAGCGGGAGAAGATGCT	2M T	2	3	0			LOC557276	neuromedin-U receptor 1-like	ND	NMUR1		CU207281.11	22
CATGCAGAACCTGGGGAAAGAGTTAAA	2-6M T	2	2	3			LOC566040	protein notum homolog	ND	NOTUM		BX548046.4	6
CATGGTGCGTATGGACATTTGAGAGTT	6M T	2	0	1			LOC556607	neural proliferation differentiation and control protein 1-like	Dr.103402	NPDC1		CR559930.6	5
CATGGCTGACATCAACACTGGCGACTT	6M T	2	0	1			LOC555911	atrial natriuretic peptide receptor 1-like	Dr.85802	NPR1		CR848841.19	16
CATGCCAACAGCTGTGTTTATGACAAT	2-6M T	2	2	3			LOC559501	netrin-G1-like	Dr.149693	NTNG1		BX510321.9	2
CATGTACTGGTCACACCACACTTTATC	6M T	2	0	1			or122-1	odorant receptor, family E, subfamily 122, member 1	Dr.112926	OR11A1		CU915725.10	15
CATGAACCTCTGGACTCTCCTATAGAC	6M T	2	0	1			osbpl3	sim to OSBPL3 | oxysterol binding protein-like 3	ND	OSBPL3		BX469919.10	16
CATGTAGAAGAGCCAGGTTGCTATGCG	2-6M T	2	1	1		Y	p4ha1a	prolyl 4-hydroxylase, alpha polypeptide I a	Dr.117141	P4HA1		AL732629.6	12
CATGAACTGGCCGCAGTTTGAGGAGTG	2M T	2	2	0			pacsin3	protein kinase C and casein kinase substrate in neurons 3	Dr.115955	PACSIN3		AL935050.11	7
CATGGGTCTGAGACGGTCTCAGCTGCT	2-6M T	2	1	2			paqr5b	progestin and adipoQ receptor family member Vb	Dr.80774	PAQR5		BX914196.10	7
CATGCCAACTTTCCTCAATAGCATAGT	2-6M T	2	2	4			LOC798104	sim to G protein coupled progestin receptor	Dr.141627	PAQR7		BX530067.4	19
CATGGTGATGAACAGCATCTATGAGCG	2-6M T	2	1	2			LOC562146	partitioning-defective protein 3 homolog	Dr.83930	PARD3B		BX294103.11	9
CATGATTAAAGTTGAGATACAGGACAT	2M T	2	2	0			pcdh17	protocadherin 17	Dr.82829	PCDH17		BX000696.19	11
CATGGAAAAACATCTCTGTGGAAGACC	2M T	2	1	0			LOC100332396	piggyBac transposable element-derived protein 4-like	Dr.116058	PGBD4		NW_003336979.1	NA
CATGCGCATCTGGATGGACGTCATAGT	2-6M T	2	1	4			phldb1	pleckstrin homology-like domain, family B, member 1	Dr.160782	PHLDB1		BX294169.10	5
CATGCGAGACGTTCCTGTTGATCAGCT	6M T	2	0	1			phrf1	PHD and ring finger domains 1	Dr.36056	PHRF1		AL928892.6	25
CATGAGCCTCTCCACAGTCAACGCCAA	2-6M T	2	1	1			phyhiplb	phytanoyl-CoA 2-hydroxylase interacting protein-like b	Dr.134787	PHYHIPL		FP102277.13	16
CATGCCGAGCGTTGACGTGTTCACACC	6M T	2	0	1			pias1	protein inhibitor of activated STAT, 1	ND	PIAS1		BX511006.10	7
CATGACAACAAGATTGTGTACCGAGAT	2-6M T	2	1	1			LOC560840	sim to PKN2 | protein kinase N2	Dr.113671	PKN1		BX511120.8	1
CATGGTGATGAACAACGGCCTGAACCC	6M T	2	0	1			plcb4	phospholipase C, beta 4	Dr.82035	PLCB4		NW_003336563.1	7
CATGCAGTCACTGCGGTGGGAGCCGTC	2-6M T	2	1	2			plcl2	phospholipase C-like 2	ND	PLCL2		NW_003335515.1	16
CATGAAAGAGGGCAAGGACAGCAGGAT	2-6M T	2	1	1			LOC796404	pleckstrin homology domain-containing family G member 5-like	Dr.157811	PLEKHG5		NW_001878452.3	23
CATGGGTTGCCAGCACTGAAGAATCTG	2M T	2	2	0			si:dkey-183c2.4	weak sim to PLXNB2 | plexin B2	Dr.88023	PLXNB2		BX323886.7	4
CATGTCACTGAACACAAAGTCAGGGTT	2-6M T	2	1	1			plxnc1	plexin C1	Dr.114686	PLXNC1		BX649503.3	4
CATGAGCTGGGTCGATTACTGCTTCTC	2-6M T	2	1	1			LOC100537292	weak sim to PNMA1 | paraneoplastic antigen MA1	ND	PNMA2		BX005011.6	12
CATGAAGATCTGTCCGTAGGAGATCAG	2M T	2	1	0			pparg	peroxisome proliferator activated receptor gamma	Dr.159153	PPARG		NW_003334915.1	11
CATGGACAAAGGGAGGGCGGAGGGACC	2-6M T	2	1	2			ppp1r11	protein phosphatase 1, regulatory (inhibitor) subunit 11	Dr.119324	PPP1R11		BX511233.10	19
CATGTGCTACGGGGATGATGCCTGCTT	2M T	2	1	0			si:ch211-193e13.3	sim to PPTC7 | PTC7 protein phosphatase homolog	Dr.108296	PPTC7		BX682234.9	10
CATGCTCAAGTTCCACAAATTCACCAT	2-6M T	2	1	1			Dr.121486	sim to PREP | prolyl endopeptidase	Dr.121486	PREP		NW_003336977.1	UN
CATGATGGAGGTAAAATCAGGAACCGC	2-6M T	2	1	2			prkaa1	protein kinase, AMP-activated, alpha 1 catalytic subunit	Dr.76384	PRKAA1		CR382323.8	5
CATGTCTCCATAGCAAAGACCGGTGGA	6M T	2	0	1			prkag2	protein kinase, AMP-activated, gamma 2 non-catalytic subunit	Dr.141920	PRKAG2		BX511000.12	2
CATGGACAAAGTTCGACTCAATGACTT	6M T	2	0	1			LOC100333967	protein kinase C alpha type-like	Dr.114481	PRKCA		FP325113.4	3
CATGAAGTCCCCAGTATGTGGCTGGTA	2-6M T	2	1	1			prkca	protein kinase C, alpha	Dr.33991	PRKCA		BX936378.11	6
CATGGGAGCCGTGTTCCTGCCAGCAGA	2-6M T	2	1	2			zgc:103657	transmembrane gamma-carboxyglutamic acid protein 1	Dr.90502	PRRG1		AL844185.9	8
CATGCCAGCAGCACCAAAGAAACCAGC	2-6M T	2	1	1			LOC570918	pleckstrin and Sec7 domain containing 2-like	Dr.117549	PSD		CR550304.13	13
CATGAGCTTGCTGCCAGAAAGCTGGAT	6M T	2	0	2		Y	ptpn23b	protein tyrosine phosphatase, non-receptor type 23, b	Dr.86837	PTPN23		CR626877.10	19
CATGATTGATATGATGCACACGGAGCA	2-6M T	2	1	1			ptprea	protein tyrosine phosphatase, receptor type, E, a	Dr.152947	PTPRE		NW_001878831.3	12
CATGGAAAGAGGGGAGTGATGTTTGAG	2-6M T	2	1	1			ptprna	protein tyrosine phosphatase, receptor type, Na	Dr.78558	PTPRN		CU861474.8	9
CATGTACAAAACCTATTTAAAGCAAAA	6M T	2	0	1			ptprsb	protein tyrosine phosphatase, receptor type, s, b	Dr.108505	PTPRS		NW_003039286.1	2
CATGCCTACGGGCACACCTCACCCCAC	6M T	2	0	2			zgc:65890	Qkr protein; quaking homolog, KH domain RNA binding	Dr.133657	QKI		CR788319.8	12
CATGAAGCAACTACTCTGAACTCCAGT	2-6M T	2	2	1			LOC795685	glutaminyl-peptide cyclotransferase-like	Dr.118984	QPCT		CR848010.19	17
CATGTGAAAAAGTAAGAATGTGTAAGT	2-6M T	2	9	1			zgc:162171	sim to RAB32 | RAB32, member RAS oncogene family	Dr.103256	RAB32		AL954129.11	7
CATGAATTGTGCTTTGAGTGAGATTCT	2-6M T	2	1	2			LOC100149497	rap guanine nucleotide exchange factor-like 1-like	ND	RAPGEFL1		AL929222.6	3
CATGAAGCGGTTCGGGAAGTGCGGCGA	6M T	2	0	1			rasl12	RAS-like, family 12	Dr.26592	RASL12		NW_003334567.1	7
CATGTTCGCATACACCAAGAACTCATT	2-6M T	2	1	1			LOC100150148	ras association domain-containing protein 9-like	ND	RASSF9		CU928204.7	18
CATGTTGAATCCCAGTCAGTGGGTGTG	2-6M T	2	1	1			rcan1a	regulator of calcineurin 1a	Dr.77660	RCAN1		CR548635.6	9
CATGATCTATTTTAAACTGTGTATCCC	2-6M T	2	1	1			rgs3	regulator of G-protein signaling 3	Dr.138343	RGS3		CU571159.17	5
CATGAAGACACGCAGCCTTGACTCACG	2-6M T	2	1	1			rictora	rapamycin-insensitive companion of mTOR a	Dr.87814	RICTOR		CR318610.8	5
CATGCCTGAGGACCAGATTGATCCAGT	2-6M T	2	1	1			LOC565615	sim to Ras and Rab interactor 2	ND	RIN2		AL929341.4	6
CATGCTGTCTGAACTCATTGGTTTCTC	2-6M T	2	1	1			rmi1	RMI1, RecQ mediated genome instability 1, homolog (S. cerevisiae)	Dr.83721	RMI1		CU682767.30	8
CATGACTATGAGTTCCCTTTACCACCC	2-6M T	2	1	3			LOC100005267	RING finger protein 122-like	Dr.78967	RNF122		BX530079.19	13
CATGATTGTCCAATTCTAAGTTTGGTA	2-6M T	2	1	1			rnf217	ring finger protein 217	Dr.119618	RNF217		BX936317.16	20
CATGGCATAGATTAAAATGCCCAATGC	2M T	2	1	0			LOC566942	serine/threonine-protein kinase SBK1-like	ND	SBK1		CU464201.12	19
CATGAAACAAGGGCTTCTCAACAAGAT	2-6M T	2	2	2			LOC100002292	protein strawberry notch homolog 2-like	Dr.152792	SBNO2		BX908731.10	22
CATGTACAGGCAGATTCTTCCTCAAGG	2-6M T	2	1	1			sema4g	semaphorin 4g	Dr.158807	SEMA4G		BX248127.9	13
CATGGACAGCATTGTGGCAGCAGTGGA	6M T	2	0	1			LOC100534786	weak sim to SEPT4 | septin 4	ND	SEPT4		NW_003337170.1	UN
CATGTTTATTAATGCACTAGAGGCTTG	2-6M T	2	2	1			setd1ba	SET domain containing 1B, a	Dr.80156	SETD1B		BX005309.14	10
CATGGTGGGAGCTCTACAATTTGAAGT	6M T	2	0	1			LOC557884	monocarboxylate transporter 3-like	Dr.117205	SLC16A3		BX000473.6	12
CATGTCGATGCCCATCAGCACCGTCTC	2-6M T	2	1	2			slc25a47b	solute carrier family 25, member 47b	Dr.74656	SLC25A47		NW_003335561.1	17
CATGATGATGCAGTCTGGACTTAAAGG	2-6M T	2	1	2			si:dkey-251i10.1	sim to SLC25A5 | solute carrier family 25 (mitochondrial carrier; adenine nucleotide translocator), member 5	Dr.91371	SLC25A5		CR786568.9	5
CATGAGAACTTTGAGGCGGTCCAGAGG	2M T	2	1	0			slc25a25b	solute carrier family 25 (mitochondrial carrier; phosphate carrier), member 25b	Dr.84065	SLC25A5		BX321890.5	5
CATGCCCTTCAGGTTGGCTATAACGAT	2M T	2	1	0			slc26a4	solute carrier family 26, member 4	Dr.155439	SLC26A4		CR382295.10	4
CATGAATCTTACAGCCACAGTTCACAT	2-6M T	2	1	1			slco5a1	solute carrier organic anion transporter family, member 5A1	Dr.107116	SLCO5A1		BX005044.9	2
CATGGTGCAAGCTATCAACTCGCCAAC	6M T	2	0	1			smoc1	SPARC related modular calcium binding 1	Dr.84351	SMOC1		NW_003335611.1	17
CATGAAGCTCTGATGGCCGATCTTAAC	2-6M T	2	1	1			smpd2	sphingomyelin phosphodiesterase 2, neutral	Dr.47411	SMPD2		CU570774.9	23
CATGGGAAACGAAGAACGAGTCAATAT	2-6M T	2	4	1			si:dkey-14p11.4	sim to SOGA1 | suppressor of glucose, autophagy associated 1	Dr.96587	SOGA1		BX470099.5	23
CATGTTGAAATGTATTTTTTGTTGATG	2-6M T	2	2	1			LOC100536618	sperm acrosome-associated protein 5-like	Dr.112801	SPACA5		NW_003334071.1	1
CATGCCGCAGTGAATTACGGTACATGA	6M T	2	0	1			LOC100334024	probable pancreatic secretory proteinase inhibitor-like	Dr.93440	SPINK4		CT009487.20	14
CATGTGTTTTATGAATCACAAATACCA	2-6M T	2	1	1			srd5a1	steroid-5-alpha-reductase, alpha polypeptide 1 (3-oxo-5 alpha-steroid delta 4-dehydrogenase alpha 1)	Dr.91944	SRD5A1		BX511155.25	19
CATGGTTAAGATAAAAAAAAAAAAAAA	2-6M T	2	2	1			sst3	somatostatin 3	Dr.82638	SST		CR381533.5	23
CATGTTGTAAACAATGCCTTTCCCATC	2M T	2	1	0			st6galnac3	ST6 (alpha-N-acetyl-neuraminyl-2,3-beta-galactosyl-1,3)-N-acetylgalactosaminide alpha-2,6-sialyltransferase 3	Dr.94740	ST6GALNAC3		FP074883.12	2
CATGTGCTTACAGCTCGCCCTGCGCTT	6M T	2	0	1			stard13	StAR-related lipid transfer (START) domain containing 13	Dr.157156	STARD13		BX293562.5	10
CATGGGTCAGCTGCCCGCTAGTGGGAC	2-6M T	2	1	5			stim2a	stromal interaction molecule 2a	Dr.160153	STIM2		BX072529.5	7
CATGCTTGGACACAGAGGCAGGAGCCA	2-6M T	2	1	8			LOC100004499	stereocilin-like	Dr.125896	STRC		BX571799.4	7
CATGAAAGATTTCAGCTCTTTACCTGC	2M T	2	1	0			stx7l	syntaxin 7-like	Dr.151944	STX7		AL929507.37	20
CATGTTCACAACTGTAGCACACACGCC	2-6M T	2	1	1			synpo2lb	synaptopodin 2-like b	Dr.132619	SYNPO2L		BX530026.5	12
CATGAAACTAATCAAATGGCGCTCTGT	2-6M T	2	1	1			tbx6	T-box gene 6	Dr.224	TBX6		BX548073.8	5
CATGGGAAAACTCGGCTAAGAAAGCTG	2-6M T	2	8	10			tcf7l1b	transcription factor 7-like 1b (T-cell specific, HMG-box)	Dr.8108	TCF7L1		CU570784.17	8
CATGACCATCACCTGCTCCACAAAAGT	2M T	2	1	0			tead1 (LOC100537467)	TEA domain family member 1 (SV40 transcriptional enhancer factor)	ND	TEAD1		CT583709.17	7
CATGAGCACAGCCGCAGACCTCCTGAA	2-6M T	2	1	1			LOC799109	tensin-like C1 domain-containing phosphatase-like	Dr.85066	TENC1		BX323028.6	23
CATGTTTCTCCGTGCCAGAGTAGGGGA	2-6M T	2	1	1			LOC567508	teneurin-3-like	ND	TENM3		BX005069.9	14
CATGTGTGGCCAAAGCTTGGAAGTTAT	2M T	2	2	0			LOC794865	tet oncogene family member 3 (tet methylcytosine dioxygenase 3)	ND	TET3		CR388049.7	5
CATGGAGCCGAGCTTGCATTTCCAGTT	6M T	2	0	1			tfe3a	transcription factor binding to IGHM enhancer 3a	Dr.78052	TFE3		CR931813.19	8
CATGGGGTCCTGCACCTACATCTGGAA	6M T	2	0	1			tgfb1a	transforming growth factor, beta 1a	Dr.76626	TGFB1		NW_001877537.2	15
CATGAGAGAGAGAGAGAATAAAGGTTT	2M T	2	1	0			thbs1	thrombospondin 1	Dr.54241	THBS1		AL928866.7	20
CATGCACAATAGCATTTGATAAGCTTT	2-6M T	2	1	1			tlr18	toll-like receptor 18	Dr.89702	TLR1		AL954306.10	16
CATGATCTGACAGGCGGGAGAGGCGGG	2-6M T	2	1	1			zgc:154058	sim to TMEM150A | transmembrane protein 150A	Dr.79886	TMEM150A		BX908770.13	13
CATGCATGTAAACCGAATGTATTCTCT	6M T	2	0	1			tmem150c	transmembrane protein 150C	Dr.111560	TMEM150C		CR847788.7	10
CATGGAAGGACTTTCATTTGTCAGCTT	2-6M T	2	6	1			tmem229b	transmembrane protein 229B	Dr.83369	TMEM229B		BX537351.16	17
CATGTTACAGTTTCCTTTGCACCTCGC	6M T	2	0	4			LOC794507	transmembrane protein 26-like	Dr.139454	TMEM26		CU861473.6	17
CATGCCTTGACTGTTATCCCAGGCCCC	6M T	2	0	2		Y	saraf	store-operated calcium entry-associated regulatory factor	Dr.11537	TMEM66		BX908747.25	1
CATGGGGGAATGAGAACAGATGCGTGG	2-6M T	2	1	1			tmem8a	transmembrane protein 8A	Dr.113450	TMEM8A		BX548256.7	1
CATGACAGCTACTCGAGCCCTCCGTCC	2M T	2	1	0			tmub2	transmembrane and ubiquitin-like domain containing 2	Dr.34883	TMUB2		AL604064.10	3
CATGACTAAAGCTCTGCACACATTCTT	2M T	2	1	0			tnpo1	transportin 1	Dr.89051	TNPO1		CR751565.5	5
CATGTGGGATGGACTGGGAGAAGAGCA	6M T	2	0	1			tox3	TOX high mobility group box family member 3	Dr.84014	TOX3		CR388027.14	7
CATGATATATACATCCAAAATTTTACA	2-6M T	2	3	1			wu:fj21g01	sim to TRAK2 | trafficking protein, kinesin binding 2	Dr.155621	TRAK2		NW_003334460.1	6
CATGACACAGTAACAGCCGCAGAGGAG	2M T	2	1	0			ftr64	finTRIM family, member 64	Dr.12268	TRIM16		CU651668.6	5
CATGATGGAGATCGAAGGCCTGCGCAA	2M T	2	1	0			trim2b	tripartite motif-containing 2b	ND	TRIM2		BX548256.7	1
CATGCACTGTGCAGGTGGCGGGATGCA	2-6M T	2	1	1			trim62	tripartite motif containing 62	Dr.152446	TRIM62		CR848022.11	11
CATGTAGTCGGCCAATGGGACAGAGCA	2-6M T	2	1	1			LOC100004946	transient receptor potential cation channel subfamily M member 4-like	Dr.162544	TRPM4		FP236460.4	3
CATGGAGAAAGAGGATGGGAAACGGGT	2M T	2	1	0			si:dkey-220f10.4	sim to tubby homolog	Dr.117432	TUB		CR926135.12	12
CATGCTTTATTTTATATCATTTCCCTG	2M T	2	1	0			ubac1	UBA domain containing 1	Dr.143451	UBAC1		CR956644.12	5
CATGGGCTCTCTGCAGCGAGTAGTGCA	6M T	2	0	1			hectd2	ubiquitin protein ligase E3A-like	Dr.119892	UBE3A		CR456625.13	12
CATGCAGGGCGCAGTGAATCCAGCATC	2-6M T	2	1	2			usp31	ubiquitin specific peptidase 31	Dr.151581	USP31		BX510308.16	3
CATGACCCCTGAGTTCAGGAATGCACT	2M T	2	1	0			usp47	ubiquitin specific peptidase 47	Dr.149776	USP47		BX005060.12	2
CATGAGGACGGCCAGTGGAATGACGTT	6M T	2	0	1			vcana	versican a	Dr.126974	VCAN		BX322628.9	5
CATGTTCAGTGCGTGTGAATATATGGA	2-6M T	2	3	6			LOC100334955	sim to VSTM5 | V-set and transmembrane domain containing 5	Dr.111397	VSTM5		NW_003335331.1	15
CATGAGCTACCTAATGGAGGCTGAGGC	2-6M T	2	1	1			kiaa0261	KIAA0261 protein	Dr.80176	WAPAL		BX000364.6	17
CATGCAGCTGTGTCAGGACAGACCGTA	2M T	2	2	0			wars2	tryptophanyl tRNA synthetase 2, mitochondrial	Dr.39146	WARS2		BX255950.8	9
CATGCTGCGCCGCGGTTGGCCTCCTCA	2-6M T	2	1	1			wdr7	WD repeat domain 7	Dr.141428	WDR7		NW_001878191.3	21
CATGAGCTCGAGGTTGCGCTTGCAGAG	6M T	2	0	1			wnt11	wingless-type MMTV integration site family, member 11	Dr.75830	WNT11		CU571324.11	5
CATGTAGATTGCTATCACTGTGAGGAT	6M T	2	0	1			wtip	Wilms tumor 1 interacting protein	Dr.87135	WTIP		AL929392.11	13
CATGAGAGTCAAGAACAACACGCTGCT	2-6M T	2	1	1			xcr1a	chemokine (C motif) receptor 1	Dr.120435	XCR1		CU657980.5	23
CATGTGGATTTTGCTGATGCTGACCTC	6M T	2	0	1			zgc:194562	sim to XYLT2 | xylosyltransferase II	Dr.148374	XYLT2		CR352258.36	3
CATGGTACCTGCTCTTTCACTGCTGCC	2-6M T	2	1	1			yod1	YOD1 OTU deubiquinating enzyme 1 homolog	Dr.104832	YOD1		BX005282.24	11
CATGAAATCGGTGACAGAGCTGAACGA	2-6M T	2	1	1			ywhag1	3-monooxygenase/tryptophan 5-monooxygenase activation protein, gamma polypeptide1	Dr.107091	YWHAG		CU655839.5	5
CATGATTTACTTTGTTTTTGAGTCAGT	6M T	2	0	1			si:ch211-89o9.6	weak sim to ZFP1 | zinc finger protein 1 homolog	Dr.10049	ZFP1		BX511019.6	1
CATGTGCTACATCCCAGTCTTCTGCTG	2-6M T	2	1	1			si:ch211-213a13.3	sim to ZNF184 | zinc finger protein 184	Dr.78982	ZNF184		BX248395.9	22
CATGACGTGTTGATTAAGAGATGATAA	2-6M T	2	1	1			LOC100000059	zinc finger protein Xfin-like	Dr.93413	ZNF208		CR382385.32	17
CATGAGGGTCCACACCGGAGAGAAGCC	2M T	2	1	0			LOC567669	zinc finger protein Xfin-like	ND	ZNF208		CU467646.17	4
CATGATGTCAAAATTGAGGAAAAAACT	2-6M T	2	1	1			LOC796272	zinc finger protein 729-like	Dr.139228	ZNF208		BX649479.3	4
CATGTGTCGTTTAAGGTAGTCTTTATT	2-6M T	2	1	1			LOC100149643	sim to ZNF226 | zinc finger protein 226	ND	ZNF226		BX927130.13	4
CATGCTCAACGCAACTCTGAAACAAAG	2-6M T	2	1	1			znf295	zinc finger protein 295	Dr.108747	ZNF295		CT573240.6	10
CATGACTACAGCAGGCGGGATACTGCC	2M T	2	1	0			znf384l	zinc finger protein 384 like	Dr.88483	ZNF384		BX927188.11	19
CATGAGGATTCACACTGGAGAAAGGTC	2-6M T	2	2	1			LOC100536174	histone-lysine N-methyltransferase PRDM9-like	Dr.153475	ZNF568		BX004964.9	15
CATGATAAGTCACACAGGAGAGAAGCC	2-6M T	2	1	1			zgc:173708	sim to ZNF568 | zinc finger protein 568	Dr.114785	ZNF568		BX511018.18	4
CATGAAGACTCACTCAAGAGAGAATCG	2M T	2	3	0			zgc:175008	zinc finger protein 551-like	Dr.124908	ZNF569		CR790382.13	4
CATGCACTCAATGTGGGAAAAGTTTCA	2-6M T	2	1	1			LOC100536976	zinc finger protein 595-like	ND	ZNF595		CU457794.12	4
CATGGGTGTTGCGATAAGGGATTGACA	2-6M T	2	1	1			LOC100537559	zinc finger protein 644-like	Dr.156708	ZNF644		BX004768.5	6
CATGAGAATTCACACTGAGCAGAAGAC	2-6M T	2	1	1			LOC100002322	zinc finger protein 84-like	ND	ZNF658		BX119918.18	1
CATGCAAGACTTTGTCCAGCAGTTGGG	2-6M T	2	1	1		N	LOC101884193	prenylcysteine oxidase-like	Dr.61848	PCYOX1		BX005397.20	21
CATGGAGGATCATCAGAACAGGAGATC	6M T	2	0	1		N	pigg	phosphatidylinositol glycan anchor biosynthesis, class G	ND	PIGG		FP102985.11	14
CATGGTCTGCGCAGCTGAATCTCTTCT	2-6M T	3	1	1		N	si:dkey-96l17.6	sim to KIFC3 kinesin family member C3	Dr.155961	KIFC3		BX296526.5	5
CATGGGCAGAATCAACTACGGCAAAGG	6M T	3	0	2		Y	glb1	galactosidase, beta 1	Dr.80770	GLB1		BX323839.13	1
CATGGGACACATAAAAAAAGATTAGTT	2-6M T	3	4	2		Y	gprc5c	G protein-coupled receptor, family C, group 5, member C	Dr.117347	GPRC5C		AL954682.6	12
CATGACTATAAATTAGCGAATGTTGCA	2-6M T	3	1	1		Y	ache	acetylcholinesterase	Dr.133438	ACHE		BX470232.17	7
CATGCAGTGAAAGGAGAGTGTCTGTAC	2M T	3	1	0		N	acss2l	acyl-CoA synthetase short-chain family member 2 like	Dr.133221	ACSS2		NW_003039267.1	2
CATGCCCCAGTGTCCGTCCCGCTCCAG	2-6M T	3	1	1	No hits		adamts9	ADAM metallopeptidase with thrombospondin type 1 motif, 9	Dr.162553	ADAMTS9		BX000993.6	11
CATGGAGAACTGGAGCCTTATTTCTCT	2M T	3	2	0		N	alg6	asparagine-linked glycosylation 6 homolog	Dr.34150	ALG6		BX664614.11	6
CATGGAGAACAACGGTGGTGGCTGGAC	2-6M T	3	1	4		Y	angptl7	angiopoietin-like 7	Dr.82189	ANGPTL7		AL844179.12	8
CATGAAGGAGGAAGAGGACCTGCTAAT	2-6M T	3	3	3	NORM		apof	apolipoprotein F	Dr.7857	APOF		CR847871.5	6
CATGGAAGAGCTGAGCAACCTTGGATT	2-6M T	3	2	1		Y	arhgef38	Rho guanine nucleotide exchange factor (GEF) 38	Dr.84814	ARHGEF38		CU570873.5	1
CATGAGGAGCGCAAGATGGTTCAAGAG	6M T	3	0	1		Y	arhgef9b	Cdc42 guanine nucleotide exchange factor (GEF) 9b	Dr.6315	ARHGEF9		CU468050.12	14
CATGTGATGTTCACCCTTACGTTGTGA	2-6M T	3	1	1		Y	aste1	asteroid homolog 1	Dr.82089	ASTE1		BX005012.7	16
CATGGCACAGTGTGAAATACAGCTGGG	2-6M T	3	1	1		Y	atg4c	autophagy-related 4C	Dr.77023	ATG4C		BX936431.7	6
CATGGATGAAAGGTGCCTTCTGGTCTG	2-6M T	3	2	1		Y	b3galtla	beta 1,3-galactosyltransferase-like a	Dr.82494	B3GALTL		CR536612.8	15
CATGCCAGACAACCAGATCAAACAGGA	2-6M T	3	2	3		Y	bcam	basal cell adhesion molecule (Lutheran blood group)	Dr.86576	BCAM		BX324189.12	16
CATGGCTTTACCCTGGGATCCCCACAC	2-6M T	3	1	1		N	bhlhe41	basic helix-loop-helix family, member e41	Dr.85246	BHLHE41		BX649507.3	18
CATGGTGGTGGAGGGCTGTGGGTGCCG	2-6M T	3	4	9		Y	bmp2b	bone morphogenetic protein 2b	Dr.568	BMP2		AL929237.17	20
CATGAAGAATGTGTAGAACCTCTTCCT	6M T	3	0	1		N	bnc2	zinc finger protein basonuclin-2	Dr.56035	BNC2		BX000462.10	1
CATGAGCGGGAAAACGCCATCTACAGT	2M T	3	1	0		N	c1qtnf6a	C1q and tumor necrosis factor related protein 6a	Dr.85075	C1QTNF6		BX085195.5	3
CATGAACAGTTGTGTGTGTGTGTGTGT	6M T	3	0	3		N	wu:fc66h01	metalloprotease TIKI1	Dr.78893	TRABD2B		NW_003334316.1	5
CATGATATCTAAAGCCCGGCAGAACTT	2-6M T	3	1	1		N	ackr4a	atypical chemokine receptor 4a	ND	CCRL1		CR293515.12	2
CATGTATTTGTGCACCACAGAAGAGGA	2-6M T	3	1	1		Y	LOC100538283	CD97 antigen-like	Dr.89252	CD97		CR352221.10	3
CATGAGTTCAACAAATTGAAGCTTTCT	2-6M T	3	1	1		Y	cflara	CASP8 and FADD-like apoptosis regulator a	Dr.82387	CFALR		BX323548.13	11
CATGGGAGGTGGACAGAATGGAGTGAG	2-6M T	3	1	1	MULTI		si:dkeyp-22b2.3 (LOC100149189)	complement factor properdin-like precursor	Dr.159631	CFP		BX469917.7	8
CATGTCCGCACCAAATTTCATCGAGGC	6M T	3	0	7		N	LOC100537531	neuronal acetylcholine receptor subunit alpha-7-like	Dr.113530	CHRNA7		NW_003336423.1	UN
CATGCATGTAATAATAAAGACATTTGA	2-6M T	3	5	3		Y	crabp1b	cellular retinoic acid binding protein 1b	Dr.88282	CRABP1		BX663612.9	7
CATGATATGTACAGTAAACATTGTGCA	2-6M T	3	2	1		Y	cxcr4a	Chemokine (C-X-C motif) receptor 4a	Dr.84258	CXCR4		CU639412.12	6
CATGGCTGTAGCTGAAGCTAAGGCTGT	2-6M T	3	1	1		Y	dvl1a	dishevelled, dsh homolog 1a	Dr.120498	DVL1		BX663608.26	23
CATGACCCGCACAAGGGATAAATACCT	2-6M T	3	1	1		N	dym	dymeclin	Dr.156817	DYM		NW_001878270.3	21
CATGAATATGGTGGTGCTCGGATACGC	2M T	3	2	0		N	zgc:153394	sim to ELOVL4 | ELOVL fatty acid elongase 4	Dr.90391	ELOVL4		CU571172.7	2
CATGGGCTTCTCAAGACCCTCGGGCTG	2-6M T	3	1	1		N	emilin1a	elastin microfibril interfacer 1a	Dr.134406	EMILIN1		BX465184.7	20
CATGGAACAGCATCACTACGGTACCTT	2-6M T	3	1	1		N	enc1	ectodermal-neural cortex 1 (with BTB domain)	Dr.79710	ENC1		FP101909.6	5
CATGAGCACAGGCCTGCCGCCCACAGG	2-6M T	3	1	1		N	epn2	epsin 2	Dr.114439	EPN2		BX322795.7	3
CATGGACGTACGTGGAACAGGCGGTTT	2-6M T	3	1	1		N	fam189a2	family with sequence similarity 189, member A2	Dr.91039	FAM189A2		BX942831.16	5
CATGAAGAAACCATCACCAGAGAGTCT	2M T	3	1	0		N	fbln2	fibulin 2	Dr.83722	FBLN2		CR555293.9	11
CATGTCCTGTCCAAACCGGAAACCTTT	2-6M T	3	1	1		Y	LOC793236	flavin-containing monooxygenase FMO GS-OX-like	Dr.116673	FMO4		FP102052.11	10
CATGATCCCTGGGCCCACCAAACTTAT	2M T	3	1	0		N	fus	fusion (involved in t(12;16) in malignant liposarcoma)	Dr.114403	FUS		BX571714.7	3
CATGAGCAGCTTTCTGAGCATAAAAAA	2-6M T	3	4	7		Y	fut7	fucosyltransferase 7 (alpha (1,3) fucosyltransferase)	ND	FUT7		NW_001879000.3	5
CATGATGCAGTTTCTGAGCTGAGCAAG	2-6M T	3	1	1		N	LOC100329883	FYVE and coiled-coil domain-containing protein 1-like	ND	FYCO1		NW_003334176.1	2
CATGTCTATCTATTGGATGTACCACAG	2M T	3	1	0	NORM		LOC560647	gamma-aminobutyric acid type B receptor subunit 2-like	Dr.118577	GABBR2		CR855311.15	16
CATGGAGATCTGAGACACACAAACACA	6M T	3	0	2		Y	LOC100333627	growth arrest-specific protein 7-like	Dr.117086	GAS7		NW_003335015.1	12
CATGAAGTCTAGATGGATGAAGGAGGA	2-6M T	3	2	1	No hits		LOC100005043	very weak sim to GIMAP7 | GTPase, IMAP family member 7	ND	GIMAP7		AL935186.22	4
CATGGAGGAGAAGAGAAAACAAAAGGA	2-6M T	3	1	1		N	cx45.6	connexin 45.6	Dr.92675	GJA5		CT737124.22	9
CATGATAAATTCACAACCATTGATCCA	2-6M T	3	14	6		Y	glt8d2	glycosyltransferase 8 domain containing 2	Dr.89559	GLT8D2		BX248111.7	4
CATGAACATCGCAGACCCCTATTCTGA	2-6M T	3	1	1		Y	hhipl2	HHIP-like 2	Dr.119014	HHIPL2		BX088653.6	17
CATGAGCGCTCCTCTCGTCGGTGCCTT	2M T	3	4	0		N	LOC557243	hippocampus abundant transcript 1 protein-like	ND	HIAT1		FP016175.5	8
CATGAGGCCTTCAAAGGATATGTACCC	2-6M T	3	6	3		Y	ical1	islet cell autoantigen 1-like	Dr.17431	ICA1		BX957337.7	6
CATGTGCAGGGAGACGTCAGCTGGCTT	2-6M T	3	1	1		Y	irs2	insulin receptor substrate 2	Dr.160024	IRS2		BX465867.24	9
CATGACAATGATTATTGCAATAGAAGT	2-6M T	3	1	1		N	jam2b	junctional adhesion molecule 2b	Dr.91102	JAM2		CR936415.4	9
CATGGCATCCCCGGTCATTAACCTCAC	2M T	3	1	0		N	kbtbd7	kelch repeat and BTB (POZ) domain containing 7	Dr.149998	KBTBD7		BX510646.5	9
CATGATGAGCCACGCGACCGTGTACGT	2M T	3	1	0		N	si:dkey-100n10.2	potassium inwardly-rectifying channel, subfamily J, member 3	Dr.153796	KCNJ3		CR752646.10	12
CATGCACTCAGACTCTGATCTGGAAAG	2-6M T	3	2	1		Y	si:ch211-193k19.1	sim to dyslexia-associated protein KIAA0319-like	ND	KIAA0319L		CR356238.10	19
CATGTGCCAAGTAAACCTACAAAGCTT	2-6M T	3	6	13		Y	lmx1ba	LIM homeobox transcription factor 1, beta a	Dr.94065	LMX1B		BX511196.11	5
CATGACCTTTAACCTCAGCTTTTCTTC	2-6M T	3	2	5		Y	LOC562072	latent-transforming growth factor beta-binding protein 1-like	Dr.87681	LTBP1		AL935174.11	17
CATGCAACACTAGCAGACATCTGGCTT	2-6M T	3	1	2		Y	march5	membrane-associated ring finger (C3HC4) 5	Dr.85149	MARCH5		BX005050.6	13
CATGAACTGTCTCTGGTATTCGGAGTT	2-6M T	3	2	2		Y	mdm1	transformed 3T3 cell double minute 1 homolog	Dr.65799	MDM1		BX465210.7	4
CATGAGGAGGGGGCAAAAAAAAAAAAA	2-6M T	3	6	2		N	mex3a	RNA-binding protein MEX3B-like	ND	MEX3B		FO082781.5	16
CATGGCGTACAGTGGTTTGGAGCTGTC	2-6M T	3	2	1		N	LOC799265	UNC93-like protein MFSD11-like	ND	MFSD11		BX571715.10	3
CATGTGGGCACCGTCAGGAGCTTCGAG	2-6M T	3	1	1		N	mib	mind bomb	Dr.124112	MIB1		AL929326.9	2
CATGGAGCGACTGCGCTTGGCACAAGA	2M T	3	1	0		N	si:dkeyp-110c12.3	interferon-induced GTP-binding protein Mx-like	ND	MX1		CU062667.11	25
CATGACCAGACTGTTTTAAAATGTCAT	2-6M T	3	3	8		N	mylipb	myosin regulatory light chain interacting protein b	Dr.74694	MYLIP		CR388381.12	16
CATGCCCTCAATCTGGTAGCTGACTCT	2-6M T	3	1	1		N	LOC562279	myosin-XIX-like	Dr.157034	MYO19		CU655870.9	5
CATGATTTTGGTGAACAACCCTTGACT	2-6M T	3	1	1		N	myo1hb	myosin Ihb	Dr.114943	MYO1H		CR387979.25	5
CATGACGCAGCGTACTTTGCAACATCG	2 M T	3	1	0		N	LOC797436	neutral cholesterol ester hydrolase 1-like	Dr.117886	NCEH1		CR376848.7	24
CATGCTACCTGAAAACTGCGTGGAGGA	2-6M T	3	1	1		N	zgc:194780	nuclear receptor binding protein	Dr.120625	NRBP2		CR391995.4	24
CATGGGTCAGTTACACCATACAGGAAC	2-6M T	3	1	1		Y	otog	otogelin-like	Dr.94611	OTOG		BX842701.16	7
CATGGTGAGGTAGAAGAGCACGGAGGA	2-6M T	3	1	1		Y	LOC100149618	p2Y purinoceptor 12-like	Dr.131708	P2RY12		CU571333.8	15
CATGCATTTTTAATAAAATATTTGGAA	2-6M T	3	1	1		N	lye	lymphocyte antigen-6, epidermis	Dr.17984	PATE1		FP067396.7	19
CATGAGGAGGAGCTTGAACGCCACGCT	2-6M T	3	1	1		N	pi4kab	phosphatidylinositol 4-kinase, catalytic, alpha b	Dr.116019	PI4KA		CU326361.5	8
CATGAGCATAGAGAAGCTGATGAAGAC	2 M T	3	1	0		N	LOC100005187	phosphatidylinositol-binding clathrin assembly protein-like		PICALM
CATGGAGAAGTTCGGGATTCAGCTGCT	2-6M T	3	2	1		Y	pick1	protein interacting with prkca 1	Dr.39413	PICK1		BX908804.17	3
CATGCCAACCTCCACTACTACGACATC	2-6M T	3	1	1		N	ppargc1a	peroxisome proliferator-activated receptor gamma, coactivator 1 alpha	Dr.87280	PPARGC1A		NW_003334614.1	7
CATGAGATTTTATTTATTAAATGAAGC	2-6M T	3	4	2		N	ppp3cca	protein phosphatase 3, catalytic subunit, gamma isozyme, a	Dr.78670	PPP3CC		BX666060.8	5
CATGAATCAGGTGAAGAAGAGACTTTC	2-6M T	3	2	9	No hits		LOC561500	proactivator polypeptide-like	Dr.118781	PSAP		BX323450.8	17
CATGATAACTGGCAGGAGCACAAGCAG	2-6M T	3	1	2		Y	psme4a	proteasome (prosome, macropain) activator subunit 4a	Dr.42253	PSME4		FP017305.7	13
CATGAGTCTCTCTGGGACTGCCACAGC	2-6M T	3	3	1		N	ptbp3	polypyrimidine tract binding protein 3	Dr.40305	PTBP3		CR931761.6	10
CATGACTGTAATTGGTGCTCAAACAAC	2-6M T	3	1	1		N	qser1	glutamine and serine-rich protein 1-like	Dr.78444	QSER1		CU896647.6	18
CATGACAGTATTTACTCCGAGTCTCTG	2-6M T	3	1	1			LOC100331732	rap guanine nucleotide exchange factor 5-like	Dr.82066	RAPGEF5		NW_003335759.1	19
CATGAGCTCACGGGACAGCAGAGACTA	2-6M T	3	1	3			rbmx2	RNA binding motif protein, X-linked	Dr.76840	RBMX2		AL935199.4	14
CATGAGCCGGTGTGAGATTGTGACGGT	2-6M T	3	1	1			LOC100334698	reversion-inducing cysteine-rich protein with Kazal motifs-like	Dr.102845	RECK		FP565452.14	24
CATGAAGCGCAGACCAGTCCACACAAA	2-6M T	3	1	12			si:busm1-169i8.11	weak sim to REG1A | regenerating islet-derived 1 alpha	ND	REG1A		AL591406.6	7
CATGTCATACATCAGAGCTCCCAGGCT	6M T	3	0	3			LOC562242	ribosomal protein S6 kinase beta-1-like	Dr.151799	RPS6KB1		BX000486.13	10
CATGAAATAGCAACCAACAATAATTTT	2-6M T	3	1	1			sema3bl	sema domain, immunoglobulin domain (Ig), short basic domain, secreted, (semaphorin) 3bl	Dr.15285	SEMA3G		BX548158.10	8
CATGGTGGTGAAGGAGCGCAACCGCAA	2M T	3	2	0			sept4b	septin 7b	Dr.76880	SEPT7_		BX005103.4	25
CATGATCTTCTGGCGACCATTAGCGGC	2-6M T	3	1	1			zgc:153639	solute carrier family 22, member 13	Dr.80008	SLC22A13		CR381686.16	24
CATGTTTAAATTTATTTTACAGTTTAG	2-6M T	3	4	1			slc2a11b	solute carrier family 2 (facilitated glucose transporter), member 11b	Dr.78347	SLC2A11		CR854962.18	5
CATGGATGTGGACAGTGGAGATGAGTA	2-6M T	3	1	1			LOC100003376	high affinity cationic amino acid transporter 1-like	Dr.96941	SLC7A1		CT573152.12	14
CATGGACGTCCTGACTGTGGCTGTGCT	2-6M T	3	2	1			LOC571064	mitochondrial sodium/hydrogen exchanger NHA2-like	ND	SLC9B2		CR388005.16	1
CATGACCCGAGATGACTCCAGTGGTGG	2-6M T	3	5	1			spred2b	sprouty-related, EVH1 domain containing 2 b	Dr.33129	SPRED2		BX629343.11	13
CATGGCCGTGTGGATTCAGGCCCAGCA	2M T	3	3	0			stat5.1	signal transducer and activator of transcription 5.1	Dr.133576	STAT5B		CR388188.13	3
CATGCCTCCATCTCCCGGCGGATCAGA	2M T	3	1	0			supt7l	suppressor of Ty 7 (S. cerevisiae)-like	Dr.88758	SUPT7L		CR559929.5	17
CATGGAGAAGCAGGAGCAGTGAGCAGG	2-6M T	3	10	1			taf5l	TAF5-like RNA polymerase II, p300/CBP-associated factor (PCAF)-associated factor	Dr.80603	TAF5L		CU467834.8	1
CATGCGGGCAATGGAGTGCACTGGAAG	2-6M T	3	3	1			tbc1d10a	TBC1 domain family, member 10A	Dr.117415	TBC1D10A		BX682234.9	10
CATGATGTATGGAGTGGCGTTGACGTT	2-6M T	3	1	1		Y	tmem178	transmembrane protein 178	Dr.133213	TMEM178		CR848823.5	11
CATGAATGCATTTACTTAGTCTCTCAG	2-6M T	3	1	1			zgc:193865	sim to TNNT1 | troponin T type 1 (skeletal, slow)	Dr.86821	TNNT1		BX511021.9	3
CATGTACCACTTGATGACCGCTGAGGC	2-6M T	3	1	1			trim35-1	tripartite motif containing 35-1	Dr.108683	TRIM35		BX469930.13	1
CATGTGATGAAAATGTGTGTGAATGGA	2-6M T	3	2	1			trpa1a	transient receptor potential cation channel, subfamily A, member 1a	Dr.135281	TRPA1		BX510360.8	2
CATGACAACAGCCAGTCCAGATCGCTT	2-6M T	3	1	3			ttc13	tetratricopeptide repeat domain 13	Dr.16195	TTC13		CU929133.8	20
CATGAGGCTGTCCAGAATCCACCACGA	2-6M T	3	1	2			ugt2a5	UDP glucuronosyltransferase 2 family, polypeptide A5	Dr.115173	UGT2A1		CU571335.5	5
CATGGAGAAGCCCAGCGCCGCCGCCTG	2M T	3	1	0			usp49	ubiquitin specific peptidase 49	Dr.13979	USP49		AL645789.14	22
CATGGACTCCTGCATTGCGAAGGCCTC	6M T	3	0	2			si:ch211-198d18.2	sim to USP6NL | USP6 N-terminal like	Dr.93351	USP6NL		BX470106.8	4
CATGGTAAAGAATGAATATATGAATAC	2-6M T	3	2	1			vcanb	versican b	Dr.77767	VCAN		CU459128.23	10
CATGAAGGGAATCACATCATTTTTGCT	6M T	3	0	1			vegfaa	vascular endothelial growth factor Aa	Dr.597	VEGFA		NW_003335481.1	16
CATGGATTGTTTAAACTAAAAGGAGCA	6M T	3	0	3			vgll4l	vestigial like 4 like	Dr.80182	VGLL4		CR376723.15	8
CATGAGCCACTGCGGCTGCGACAGGGA	2-6M T	3	1	2			wnt7bb	wingless-type MMTV integration site family, member 7Bb	Dr.154018	WNT7B		CR385026.16	25
CATGGCAACTGCTCATTGGCAGGCAGT	2-6M T	3	1	1			Dr.151438	sim to ZNF135 | zinc finger protein 135	Dr.151438	ZNF135		NW_001877448.3	4
CATGCAAGAAACCTGGCAGTGCACATG	2M T	3	1	0			LOC100535649	zinc finger protein 567-like	ND	ZNF41		CR792418.18	4
CATGAAGACGGACCTGGATCCGGTTTC	2-6M T	3	1	1			si:dkey-7l6.3	sim to ZNF585A | zinc finger protein 585A	Dr.109948	ZNF585A		BX005044.9	2
CATGAGATTTAGGTATTTAGGAAACCT	2-6M T	3	1	1			si:dkey-15h8.11	sim to ZNF782 | zinc finger protein 782	Dr.148525	ZNF782		BX640576.8	22
CATGATGATCCACACTGGAGAGATACC	2-6M T	3	1	1			zgc:173720	zinc finger protein 45-like	Dr.114740	ZNF879		AL590152.51	4
CATGCACCCAGCTCTGTGTCTATGAAG	2-6M T	3	1	1		N	si:ch211-213a13.9	very weak sim to NLRC3 | NLR family, CARD domain containing 3	ND	NLRC3		BX248395.9	22
CATGAAGCGGCAGTTAAAATGAGAGCT	6M T	3	17	0		Y	id2a	Danio rerio inhibitor of DNA binding 2, dominant negative helix-loop-helix protein,	Dr.32819	ID2
CATGGAGCCACTCATCTGTGTACAGCC	6M T	4	0	2		Y	pgap1	post-GPI attachment to proteins 1	Dr.116418	PGAP1		CT867952.7	9
CATGGCCGTGGACTGTGAGGACCGGCG	2-6M T	4	2	1		N	appl1	adaptor protein, phosphotyrosine interaction, PH domain and leucine zipper containing 1	Dr.69911	APPL1		NW_003039999.2	11
CATGGAAAGTAAAGGAGCAAACACACC	2-6M T	4	1	1		Y	arhgef7b	Rho guanine nucleotide exchange factor (GEF) 7b	Dr.78916	ARHGEF7		NW_003334061.1	1
CATGGCCAAACTGACAGGTCAGGTTCT	2-6M T	4	1	4		Y	cidea	cell death-inducing DFFA-like effector a	Dr.141228	CIDEA		FP236475.6	24
CATGTCTCGCAGTAGTTATCCGTTTGC	2-6M T	4	1	3		N	col18a1	collagen type XVIII, alpha 1	Dr.52833	COL18A1		BX927363.9	9
CATGAAGAACCTGTAGCCGGTGAACTT	2-6M T	4	1	1		N	col4a2	collagen, type IV, alpha 2	Dr.86173	COL4A6		BX539345.7	9
CATGAAGCCACTGCTAGTGTTTGTAAA	2-6M T	4	1	1		N	dgkza	diacylglycerol kinase, zeta a	Dr.81825	DGKZ		CR356225.5	7
CATGTACGCTGAAACTCTGCACATCCA	2-6M T	4	1	1		Y	dse	dermatan sulfate epimerase	Dr.48488	DSE		BX855610.5	20
CATGACGGTTCTAGTGGAGCGTCTGAC	2-6M T	4	1	1		Y	dvl3	dishevelled segment polarity protein 3	ND	DVL3		ND	18
CATGTGATTTGATCAGAGAATACTCTT	2-6M T	4	3	5		Y	ebf1a	early B-cell factor 1a	Dr.157177	EBF1		BX005211.21	14
CATGGCCAACATCTGACTGCGGAACGA	2-6M T	4	1	1		Y	eif3eb	eukaryotic translation initiation factor 3, subunit E, b	Dr.5119	EIF3E		BX957242.15	19
CATGTCTGTAGAGCTGAGCTTCATCGT	2-6M T	4	1	1		N	epha2	eph receptor A2	Dr.75828	EPHA2		CT033836.8	6
CATGGATGTACACGAGCGCTTCACCGA	2-6M T	4	1	2		Y	fam20cb	family with sequence similarity 20, member Cb	Dr.13423	FAM20C		BX629347.20	12
CATGCCCCTGTTCCGATCGCGAGGATT	2-6M T	4	1	1		N	fgd4a	FYVE, RhoGEF and PH domain containing 4a	Dr.158966	FGD4		CR293524.10	18
CATGTATGGAGGTAAGTGATGAGTTGG	2-6M T	4	2	2		Y	fndc3ba	fibronectin type III domain containing 3Ba	Dr.68009	FNDC3B		BX294118.4	2
CATGTTTTCAGAACCGTGATGACCCGC	2-6M T	4	1	1		Y	foxo1b	forkhead box O1 b	Dr.110450	FOXO1		AL953846.6	10
CATGTTCTGTACAAAATAATTGATTAA	2-6M T	4	3	7		Y	gas2l1	growth arrest-specific 2 like 1	Dr.78978	GAS2L1		BX664747.12	5
CATGAACGTGCCTTTCTACACCAACCG	2M T	4	1	0		N	si:ch211-276f18.2	glucose-fructose oxidoreductase domain containing 1	Dr.148749	GFOD1		CT573356.15	24
CATGACAGCAGCTCTTGACTTCTACTT	2M T	4	1	0		N	gls2	glutaminase 2 (liver, mitochondrial)	ND	GLS		BX927144.24	8
CATGTACTGTATGCATCCTATTTAATT	2-6M T	4	2	1		N	hcfc2	host cell factor C2	Dr.22869	HCFC2		FP236856.8	4
CATGCATTAGGCAATAACACATTGTTA	6M T	4	0	1		N	hs3st1l2	heparan sulfate (glucosamine) 3-O-sulfotransferase 1-like 2	Dr.37692	HS3ST1		BX470224.5	5
CATGGAGAATATGAAAGCGTGGACCTT	2-6M T	4	3	9		Y	si:ch211-106k21.5	weak sim to ISLR | immunoglobulin superfamily containing leucine-rich repeat	Dr.65440	ISLR		BX569796.6	2
CATGGACGTGGAGTTCCTGTATCATCT	2-6M T	4	1	1		N	LOC100149388	inositol 1,4,5-triphosphate receptor, type 1-like	Dr.47889	ITPR1		BX914197.15	11
CATGGAAAAAGATGAAAAAGAAGGAAT	2-6M T	4	1	2		N	LOC571586	probable JmjC domain-containing histone demethylation protein 2C-like	Dr.155943	JMJD1C		NW_001877793.3	17
CATGCCCAAAGAGTACATCACGCGCCT	2-6M T	4	1	2		N	kat2a	K(lysine) acetyltransferase 2A	Dr.34592	KAT2A		BX005093.22	3
CATGAGAAAGAGTTCGGCTGTGTAGAT	2-6M T	4	1	1	NORM		LOC100536245	kinesin light chain 1-like	Dr.15378	KLC1		CU638692.13	22
CATGAACTGTGCTCAGCTCTCAGTGCT	2-6M T	4	1	2		Y	LOC565295	ceramide synthase 2-like	Dr.67948	CERS2		BX005277.11	16
CATGAAGCGAGGCTTGGAGCCGCTGGT	2-6M T	4	1	1		N	wu:fc17b08	sim to chromosome 10 open reading frame 12	Dr.40181	C10orf12		BX005147.15	13
CATGAGCATTTACTGTTTCAATTCAAT	2-6M T	4	2	2		Y	si:ch211-81a5.5	leucine-rich repeat-containing protein 71	Dr.86261	LRRC71		CR626935.6	19
CATGATCAGCATCCAGAAGAAGGCTGG	2-6M T	4	1	2		N	mpp6a	membrane protein, palmitoylated 6a (MAGUK p55 subfamily member 6)	Dr.84894	MPP6		CU905502.8	16
CATGCCGTTGTTCTGTCTGCTCCCCTT	2-6M T	4	1	1		N	tenm1	teneurin transmembrane protein 1	ND	TENM1		BX537264.9	5
CATGCGCTCAACTGCCACAGAATGAAG	2-6M T	4	1	1		N	pbx1b	pre-B-cell leukemia homeobox 1	Dr.84621			NW_003334457.1	6
CATGAAGAGGTGCCTACTGCTCTTCTG	2-6M T	4	1	1		N	zmp:0000001078	cytosolic phospholipase A2 gamma-like	Dr.157884	PLA2G4C		CT573103.21	5
CATGCAGGCTCAGGCCAACAACGGCAC	2-6M T	4	1	1		Y	plce1	phospholipase C, epsilon 1	Dr.80689	PLCE1		CU459209.4	12
CATGCATGAACGCCATAGTGGTATCCT	2-6M T	4	1	1		Y	pparab	peroxisome proliferator activated receptor alpha, like	Dr.103116	PPARA		CR354430.16	25
CATGCTTACTCAATGCTTTGAGAAGGG	2-6M T	4	1	1		N	ptprq	protein tyrosine phosphatase, receptor type, Q	Dr.155412	PTPRQ		AL928990.4	18
CATGCCTGACCTGGTCGAGGTCTCGAC	2-6M T	4	1	1		N	si:ch1073-55a19.2	sim to RANBP2 | RAN binding protein 2	Dr.79445	RANBP2		CU638712.5	9
CATGGAGCTGGAGGACGACAAGCGAGA	2-6M T	4	1	2		Y	si:ch211-12d10.5	sim to RBM25 | RNA binding motif protein 25	Dr.78378	RBM25		BX470227.9	13
CATGTCAATTAGCAAAGGATTTTGAAC	2-6M T	4	3	19		Y	rgs9bp	regulator of G-protein signalling 9 binding protein	Dr.23226	RGS9BP		CT574559.10	7
CATGAAGAAAAAGAGGAAAGAAAGGAA	6M T	4	0	3		Y	rpgrip1	retinitis pigmentosa GTPase regulator interacting protein 1	Dr.157392	RPGRIP1L		CR925835.5	24
CATGAAGAACACACGCAAGGACATCGA	2M T	4	1	0		N	rreb1b	ras responsive element binding protein 1b	Dr.50998	RREB1		CR388093.11	2
CATGAAACATCTGAGTCGAGTGGTCAA	2-6M T	4	1	1		N	sept3	septin 3	Dr.78375	SEPT3		BX537268.5	1
CATGAGATGTCTTCATCAAGAATGAGC	6M T	4	0	1		N	setbp1	SET binding protein 1	Dr.79379	SETBP1		AL935198.6	5
CATGGACAACCGGCTGCCAATCATCTC	2-6M T	4	1	1		Y	shc1	SHC-transforming protein 1	Dr.20243	SHC1		CR854942.16	16
CATGATGATTCCTCAGTGTGCCGTGTT	2-6M T	4	2	1		Y	slc16a2	solute carrier family 16 (monocarboxylic acid transporters), member 2	ND	SLC16A2		NW_003040186.2	14
CATGCTTAGCGTGAGTTAGACGACAGA	2-6M T	4	4	80		Y	spp1	spp1 secreted phosphoprotein 1	Dr.85739	SPP1		CR925756.11	10
CATGGTTCAACAACATCACTACAAATT	2-6M T	4	3	1		N	tas1r3	taste receptor, type 1, member 3	Dr.94481	TAS1R3		FP236327.7	11
CATGAATGGTGTGTGTGTTTGTTTTTG	2-6M T	4	7	3		Y	tgfbr2	transforming growth factor, beta receptor II	Dr.77521	TGFBR2		CR848052.16	16
CATGTGCATGAGCGCCAGAAGCACAAG	2-6M T	4	1	1		N	tmem63bb	transmembrane protein 63Bb	Dr.81942	TMEM63B		NW_003334979.1	11
CATGAAAGTCCTTCTCCTCATCCTCAC	2-6M T	4	2	1		N	si:ch211-235o23.1	transmembrane protein 71	Dr.82064	TMEM71		BX572635.17	2
CATGAGATGTTGGCGGTGGAACCAATA	2-6M T	4	1	1		N	trpv4	transient receptor potential cation channel, subfamily V, member 4	Dr.85921	TRPV4		BX323811.14	5
CATGATTATCAGGTATGTTAGAGGAAA	2-6M T	4	1	1		Y	vps35	vacuolar protein sorting 35	Dr.72367	VPS35		AL928906.4	7
CATGGGTGTATCTGATGAGATCCACAC	2-6M T	4	1	1		N	wdr82	WD repeat domain containing 82	Dr.4587	WDR82		AL935208.8	6
CATGACCTCATACAAGAGCTTGAGGTG	2M T	4	1	0		N	zbed4	zinc finger, BED domain containing 4	Dr.77050	ZBED4		CR751234.13	4
CATGAGATGGCCAACAAATCTGGTTTG	2-6M T	4	1	2		N	si:ch73-386h18.1	zinc finger homeobox protein 3	Dr.105053	ZFHX3		CU607082.17	18
CATGAAGAAAGTGAAAAGCGAGAAGAT	2-6M T	4	1	1		Y	znf609a	zinc finger protein 609	Dr.78388	ZNF609		BX005109.23	25
CATGATGAACTGACACATACGCCCGAG	2-6M T	4	6	1		Y	LOC100534771	phosphatidylinositol-binding clathrin assembly protein-like	Dr.119875	PICALM		CT025910.7	21
CATGCCAGGTACAAAACCTCAGCCATC	2-6M T	5	1	2		Y	adm2	adrenomedullin 2	Dr.41309	ADM2		BX248111.7	4
CATGAACACTAACTCAGGAATCAACAC	2-6M T	5	2	2		Y	tcirg1	T-cell, immune regulator 1, ATPase, H+ transporting, lysosomal V0 subunit A3	Dr.157406	ATP6V0A2		BX901937.7	1
CATGCTGGAGATCTTGAGGACAGATTT	2-6M T	5	1	2		Y	bcar3	breast cancer anti-estrogen resistance 3	Dr.92294	BCAR3		CR381644.8	8
CATGACAGAACACACTTGGTCTGGGAT	2-6M T	5	1	2		Y	crebl2	cAMP responsive element binding protein-like 2	Dr.84907	CREBL2		FP085386.9	19
CATGGGTACCATCTGCGAGCTTACTTA	2-6M T	5	1	1		N	cxcr4b	Chemokine (C-X-C motif), receptor 4b	Dr.75485	CXCR4		BX001069.5	9
CATGAGGGTCTCGGACTGCTTTTGGAT	2-6M T	5	1	1		Y	diaph2	diaphanous homolog 2	Dr.87568	DIAPH2		BX004990.12	14
CATGAAGTGTCCACAGGAAGATGGGGG	2-6M T	5	1	1		N	dysf	dysferlin, limb girdle muscular dystrophy 2B (autosomal recessive)	Dr.157052	DYSF		CR847843.7	7
CATGCCCTATTTGTAAGTTATTTTTGT	2-6M T	5	1	4		N	edil3	EGF-like repeats and discoidin I-like domains 3	ND	EDIL3		BX465199.9	5
CATGTGCTCGCGCTCCTCTCGCTCCTC	2-6M T	5	2	2		Y	fam160b1	family with sequence similarity 160, member B1	Dr.91618	FAM160B1		BX957309.6	13
CATGTCCATTAGCAAGCCTGAAGTTGA	2-6M T	5	3	2		N	fam198b	family with sequence similarity 198, member B	Dr.82676	FAM198B		CT009687.10	14
CATGATGCTCCGAGTTTGGACTTAGGC	2-6M T	5	1	2		Y	fam83h	family with sequence similarity 83, member H	Dr.109377	FAM83H		CR792417.12	13
CATGGAAAGACTGGGAAACCTGTACGG	2-6M T	5	2	3		Y	fgf19	fibroblast growth factor 19	Dr.92639	FGF19		AL929586.19	7
CATGGAGTACTGGTGGATCATCCGCTC	2-6M T	5	1	1		N	gcgra	glucagon receptor a	Dr.157662	GCGR		CR847514.13	3
CATGTACTTTGATCGCTTCCTCCAATG	2-6M T	5	1	1		N	grk5l	G protein-coupled receptor kinase 5 like	Dr.83886	GRK5		CU861510.6	8
CATGTGGTTTTGGAGCCTGATCAACCT	2-6M T	5	1	1		N	igdcc4	immunoglobulin superfamily, DCC subclass, member 4	ND	IGDCC4		CR318636.11	7
CATGCCGAGTCCTCCAGTAAAGCTTAC	2-6M T	5	1	1		N	itga1	integrin, alpha 1	Dr.157711	ITGA1		BX571955.15	10
CATGCATGAGAGACAGAGGAGTAGAGT	2-6M T	5	1	3		N	LOC103911724	integrin alpha-2-like	Dr.152158	ITGA2		CR925790.7	10
CATGTCAATGGCTTTGGTGTAGTTATT	2-6M T	5	1	2		Y	mapk6	mitogen-activated protein kinase 6	Dr.80740	MAPK6		AL935189.7	18
CATGTCATTTCAGTACTCTAAAAAAAT	2-6M T	5	2	3		Y	mxa	myxovirus (influenza) resistance A	Dr.80859	MX1		CT998565.24	1
CATGAAGCCCTCGGTGCAAAGCAAAAA	2-6M T	5	1	2		Y	notch1b	Notch homolog 1b	Dr.75825	NOTCH1		BX511138.10	5
CATGGACTCTTGCACTACCACAGAGCA	2-6M T	5	1	1		N	plxnb1b	plexin b1b	Dr.39234	PLXNB1		BX957269.5	6
CATGTCTTGCAACCCTGAAGGGCTTCT	2-6M T	5	4	1		N	prf1.5	perforin 1.5	Dr.116184	PRF1		AL928845.10	8
CATGAGAAAGAACAGAGTTCTGCAGAT	2-6M T	5	1	9		Y	ptpreb	protein tyrosine phosphatase, receptor type, E b	Dr.82846	PTPRE		AL845481.5	17
CATGTATTAATAATGATGAAGCAGTCT	2-6M T	5	7	6		Y	rnd3b	Rho family GTPase 3b	Dr.32839	RND3		CR394542.5	9
CATGGACATTTGGAAGTAGTCTTGTTT	2-6M T	5	2	6	No hits		LOC100534713	very weak sim to RTL1 | retrotransposon-like 1	ND	RTL1		BX284666.7	2
CATGGGTCCGGTTATAGCTGTGCAAAA	2-6M T	5	2	5		Y	sema3d	semaphorin 3d	Dr.77612	SEMA3D		CU861648.4	18
CATGTGGATTGGGATGTGGTTGATCAT	2-6M T	5	1	8		Y	slc4a2a	solute carrier family 4, anion exchanger, member 2a	Dr.75558	SLC4A2		BX663499.5	2
CATGCAATGATGGACTTTGGCATCAGT	2-6M T	5	1	1		Y	sox5	SRY-box containing gene 5	Dr.101350	SOX5		BX649261.3	4
CATGAGTTTAAACACTTATCTAATGTA	2-6M T	5	4	2		Y	stx6	syntaxin 6	Dr.75422	STX6		BX664601.6	22
CATGATCTGGTTGATTAAATCTTGCTT	2M T	5	2	0		N	ugt1b4	UDP glucuronosyltransferase 1 family, polypeptide B4	Dr.159626	UGT1A6		BX005348.9	11
CATGGTTAAAATCCCCAGCAAGGGCTC	2-6M T	6	2	2		Y	asic4a	acid-sensing (proton-gated) ion channel family member 4a	Dr.91508	ASIC4		CU862022.12	9
CATGAAACAGTGGAAAGAGGAGGCAAG	2-6M T	6	2	1		N	cpsf3l	cleavage and polyadenylation specific factor 3-like	Dr.75443	CPSF3L		CR846089.12	23
CATGACGTGGCAGGAAGAATTTTTACC	2-6M T	6	2	1		Y	dgki	diacylglycerol kinase, iota	Dr.77849	DGKI		NW_001878891.3	4
CATGAAGTGCCTGGTCAGGAGCTAGAG	2-6M T	6	1	2		N	esyt1a	extended synaptotagmin-like protein 1a	Dr.60914	ESYT1		CR382340.7	23
CATGATACCAAGTCCCTCATCAAGTGC	2-6M T	6	1	1		Y	si:dkey-183c23.1	sim to golgi brefeldin A resistant guanine nucleotide exchange factor 1	Dr.97989	GBF1		CU463183.14	13
CATGGAGAAGCAGTATGTGGACGACGG	6M T	6	0	2		Y	wu:fb77a09	sim to nidogen 2 (osteonidogen)	Dr.76336	NID2		CR387921.7	17
CATGAAGTGATCCGTGTAGACCCACCC	2-6M T	6	1	5		Y	phactr4a	phosphatase and actin regulator 4a	Dr.160658	PHACTR4		AL954687.17	19
CATGAAGCCCGAACGCCGCGCGCCCGC	2-6M T	6	1	1		Y	LOC558432	sprouty-related, EVH1 domain-containing protein 2-like	Dr.103229	SPRED2		BX547996.10	1
CATGGAGGAGGCATTACCAAACTCGAA	2-6M T	6	3	11		Y	si:dkey-163m14.2	sim to coagulation factor II (thrombin) receptor	ND	F2R		BX323555.10	21
CATGCTCCTGAAGATATTCCTGTTTGC	2-6M T	7	1	2		Y	zgc:56622	sim to AKR1B10 aldo-keto reductase family 1, member B10 (aldose reductase)	Dr.150554	AKR1B10		CR381668.8	18
CATGACCTTTAAAGTGGACCGGAAAAG	2-6M T	7	3	3		N	fahd1	fumarylacetoacetate hydrolase domain containing 1	Dr.45793	FAHD1		AL772362.8	3
CATGAGGTTTCGTCTGCAAGCGGGAAA	2-6M T	7	1	6		Y	plekhh1	pleckstrin homology domain containing, family H (with MyTH4 domain) member 1	Dr.46470	PLEKHH1		BX248106.7	17
CATGAAAACTGAAGCATATAGTGTTTC	2-6M T	7	2	1		Y	scn4bb	sodium channel, voltage-gated, type IV, beta b	Dr.49136	SCN4B		BX323825.19	5
CATGGACAGGATCTTTCTGAGAACCCT	2-6M T	7	3	1		N	slc16a12a	solute carrier family 16 (monocarboxylic acid transporters), member 12a	Dr.134298	SLC16A12		BX511087.12	17
CATGGAGAAAGATGCCAAGACTTTTGC	2-6M T	7	1	2		N	LOC100004576	serine/threonine-protein kinase TAO1-like	ND	TAOK1		CR848664.5	15
CATGCAGGTTGTGTGGCGGATGGGCTA	2-6M T	8	1	1		Y	klhl32	kelch-like 32	Dr.92160	KLHL32		CR854989.8	16
CATGCGACTAGACATCCTCCATCTGTC	2-6M T	8	3	1		N	si:ch211-18i17.2	sim to pleckstrin homology domain containing, family H (with MyTH4 domain) member 3	Dr.34545	PLEKHH3		CT573704.7	3
CATGTACAGATCTTAACTCATTTTCAG	2-6M T	8	11	7		Y	si:dkey-82f1.1	sim to ST5 | suppression of tumorigenicity 5	Dr.9393	ST5		BX957346.14	10
CATGAACAACAGTGAGAAGGAGGTGGA	2-6M T	9	2	1		N	fermt2	fermitin family homolog 2	Dr.83795	FERMT2		AL928709.36	17
CATGAGCGTAAGCTGGACTGCCAGACT	2-6M T	9	1	5		Y	slc7a11	solute carrier family 7 (anionic amino acid transporter light chain, xc- system), member 11	Dr.141377	SLC7A11		CT027780.11	14
CATGTTTTATGGGTGCTTAACGCTCAG	2-6M T	9	6	8		Y	dhcr7	7-dehydrocholesterol reductase	Dr.83736	DHCR7		BX004967.9	2
CATGCCAAAATGGGTTCAGCTAGTCTT	2-6M T	10	4	13		Y	si:ch211-39a7.1	neuronal nicotinic acetylocholine receptor alpha-7 subunit-like	Dr.104111	CHRNA7		CU468271.5	19
CATGCTTGACCAGGGTGGATAACGCAG	2-6M T	10	2	1		Y	kdrl	kinase insert domain receptor like	Dr.75094	FLT1		CR759732.9	14
CATGCGTTTCCAGCGGGAGTTGGTGAA	2-6M T	10	2	3		Y	usp24	ubiquitin specific peptidase 24	Dr.122281	USP24		BX897740.7	20
CATGATGGCAAAGAGCTGTGCCGAGAA	6M T	14	0	31	NORM		ryr3	ryanodine receptor 3	Dr.51090	RYR3		BX682544.5	20
CATGCAGGGCAAGGACTGCCCCAACAA	2-6M T	15	2	3		Y	ca10a	carbonic anhydrase Xa	Dr.13585	CA10		CR753823.10	12
CATGCAGTTTCCAGAGGATCCTGTTGC	2-6M T	17	2	2		Y	scospondin	subcommissural organ spondin	Dr.152078	SSPO		BX323854.9	24
