# Supplementary material for: Evolutionarily novel genes are expressed in transgenic fish tumors and their orthologs are involved in development of progressive traits in humans
Source: Infect Agent Cancer. 2019 Dec 5;14:46. doi: 10.1186/s13027-019-0262-5 (PMC6896781; doi:10.1186/s13027-019-0262-5)
Supplement: Supplementary file 6 — Additional file 6. Ensembl data for 870 genes expressed in tumors and in liver after tumor regression. [file 13027_2019_262_MOESM6_ESM.xlsx]

## Sheet: Лист1
Ensembl data for 870 genes with the Ensembl gene IDs
Gene stable ID	Gene name	Gene type	Chromosome/scaffold name	Gene description
ENSDARG00000000229	usp49	protein_coding	22	ubiquitin specific peptidase 49 [Source:ZFIN;Acc:ZDB-GENE-050208-484]
ENSDARG00000000551	slc1a4	protein_coding	13	solute carrier family 1 (glutamate/neutral amino acid transporter), member 4 [Source:ZFIN;Acc:ZDB-GENE-030616-566]
ENSDARG00000001463	tdh2	protein_coding	17	L-threonine dehydrogenase 2 [Source:ZFIN;Acc:ZDB-GENE-070620-14]
ENSDARG00000001721	oc90	protein_coding	2	otoconin 90 [Source:ZFIN;Acc:ZDB-GENE-070912-300]
ENSDARG00000001835	nalcn	protein_coding	9	sodium leak channel, non-selective [Source:ZFIN;Acc:ZDB-GENE-050410-12]
ENSDARG00000002217	scocb	protein_coding	14	short coiled-coil protein b [Source:ZFIN;Acc:ZDB-GENE-041010-41]
ENSDARG00000002333	fam102bb	protein_coding	20	family with sequence similarity 102, member B, b [Source:ZFIN;Acc:ZDB-GENE-041014-330]
ENSDARG00000002391	tlcd1	protein_coding	21	TLC domain containing 1 [Source:ZFIN;Acc:ZDB-GENE-041010-173]
ENSDARG00000002549	eif3eb	protein_coding	19	eukaryotic translation initiation factor 3, subunit E, b [Source:ZFIN;Acc:ZDB-GENE-050208-283]
ENSDARG00000002593	slc45a2	protein_coding	21	solute carrier family 45, member 2 [Source:ZFIN;Acc:ZDB-GENE-050208-97]
ENSDARG00000002701	rasl12	protein_coding	7	RAS-like, family 12 [Source:ZFIN;Acc:ZDB-GENE-040426-1201]
ENSDARG00000002991	cep135	protein_coding	20	centrosomal protein 135 [Source:ZFIN;Acc:ZDB-GENE-041210-325]
ENSDARG00000003109	rcan1a	protein_coding	9	regulator of calcineurin 1a [Source:ZFIN;Acc:ZDB-GENE-040801-135]
ENSDARG00000003449	pde10a	protein_coding	13	phosphodiesterase 10A [Source:ZFIN;Acc:ZDB-GENE-040426-1115]
ENSDARG00000003527	mak16	protein_coding	8	MAK16 homolog (S. cerevisiae) [Source:ZFIN;Acc:ZDB-GENE-020419-35]
ENSDARG00000003576	klhl32	protein_coding	16	kelch-like family member 32 [Source:ZFIN;Acc:ZDB-GENE-070209-47]
ENSDARG00000003732	mitfa	protein_coding	6	microphthalmia-associated transcription factor a [Source:ZFIN;Acc:ZDB-GENE-990910-11]
ENSDARG00000003903	hapln2	protein_coding	16	hyaluronan and proteoglycan link protein 2 [Source:ZFIN;Acc:ZDB-GENE-030131-8089]
ENSDARG00000004243	asic4b	protein_coding	6	acid-sensing (proton-gated) ion channel family member 4b [Source:ZFIN;Acc:ZDB-GENE-040513-6]
ENSDARG00000004256	wnt11	protein_coding	5	wingless-type MMTV integration site family, member 11 [Source:ZFIN;Acc:ZDB-GENE-990603-12]
ENSDARG00000004433	btk	protein_coding	14	Bruton agammaglobulinemia tyrosine kinase [Source:ZFIN;Acc:ZDB-GENE-070531-1]
ENSDARG00000004451	tnfrsfa	protein_coding	21	tumor necrosis factor receptor superfamily, member a [Source:ZFIN;Acc:ZDB-GENE-010802-1]
ENSDARG00000004635	epha7	protein_coding	20	eph receptor A7 [Source:ZFIN;Acc:ZDB-GENE-030131-3745]
ENSDARG00000004712	tbr1b	protein_coding	9	T-box, brain, 1b [Source:ZFIN;Acc:ZDB-GENE-000323-1]
ENSDARG00000005095	glcea	protein_coding	25	glucuronic acid epimerase a [Source:ZFIN;Acc:ZDB-GENE-040630-9]
ENSDARG00000005271	zc3h12a	protein_coding	16	zinc finger CCCH-type containing 12A [Source:ZFIN;Acc:ZDB-GENE-110411-6]
ENSDARG00000005372	camk4	protein_coding	5	calcium/calmodulin-dependent protein kinase IV [Source:ZFIN;Acc:ZDB-GENE-050417-76]
ENSDARG00000005479	tenm3	protein_coding	1	teneurin transmembrane protein 3 [Source:ZFIN;Acc:ZDB-GENE-990714-19]
ENSDARG00000005561	gfm2	protein_coding	5	G elongation factor, mitochondrial 2 [Source:ZFIN;Acc:ZDB-GENE-060201-3]
ENSDARG00000005800	ampd3a	protein_coding	7	adenosine monophosphate deaminase 3a [Source:ZFIN;Acc:ZDB-GENE-110407-2]
ENSDARG00000005834	gatad2b	protein_coding	19	GATA zinc finger domain containing 2B [Source:ZFIN;Acc:ZDB-GENE-060503-655]
ENSDARG00000006220	ugt1ab	protein_coding	9	UDP glucuronosyltransferase 1 family a, b [Source:ZFIN;Acc:ZDB-GENE-040426-2762]
ENSDARG00000006272	mpp5a	protein_coding	17	membrane protein, palmitoylated 5a (MAGUK p55 subfamily member 5) [Source:ZFIN;Acc:ZDB-GENE-020712-1]
ENSDARG00000006341	tas1r3	protein_coding	11	taste receptor, type 1, member 3 [Source:ZFIN;Acc:ZDB-GENE-070917-3]
ENSDARG00000006636	slitrk2	protein_coding	14	SLIT and NTRK-like family, member 2 [Source:ZFIN;Acc:ZDB-GENE-080327-7]
ENSDARG00000006683	arhgef6	protein_coding	14	Rac/Cdc42 guanine nucleotide exchange factor (GEF) 6 [Source:ZFIN;Acc:ZDB-GENE-101013-2]
ENSDARG00000006797	nt5dc1	protein_coding	20	5'-nucleotidase domain containing 1 [Source:ZFIN;Acc:ZDB-GENE-030131-8274]
ENSDARG00000006837	mycn	protein_coding	20	MYCN proto-oncogene, bHLH transcription factor [Source:ZFIN;Acc:ZDB-GENE-020711-1]
ENSDARG00000006892	myo3b	protein_coding	9	myosin IIIB [Source:ZFIN;Acc:ZDB-GENE-070706-2]
ENSDARG00000006939	tbx6l	protein_coding	5	T-box 6, like [Source:ZFIN;Acc:ZDB-GENE-980526-171]
ENSDARG00000007369	tcf7l1b	protein_coding	8	transcription factor 7 like 1b [Source:ZFIN;Acc:ZDB-GENE-991110-10]
ENSDARG00000007383	kcnk6	protein_coding	18	potassium channel, subfamily K, member 6 [Source:ZFIN;Acc:ZDB-GENE-050309-213]
ENSDARG00000007396	rnd3b	protein_coding	9	Rho family GTPase 3b [Source:ZFIN;Acc:ZDB-GENE-040718-331]
ENSDARG00000007461	srgap1a	protein_coding	18	SLIT-ROBO Rho GTPase activating protein 1a [Source:ZFIN;Acc:ZDB-GENE-050420-284]
ENSDARG00000007560	sema3bl	protein_coding	8	sema domain, immunoglobulin domain (Ig), short basic domain, secreted, (semaphorin) 3bl [Source:ZFIN;Acc:ZDB-GENE-030131-2956]
ENSDARG00000007655	crybb1l3	protein_coding	15	crystallin, beta B1, like 3 [Source:ZFIN;Acc:ZDB-GENE-070820-11]
ENSDARG00000007944	lhx1b	protein_coding	5	LIM homeobox 1b [Source:ZFIN;Acc:ZDB-GENE-980526-116]
ENSDARG00000008224	vps35	protein_coding	7	vacuolar protein sorting 35 homolog (S. cerevisiae) [Source:ZFIN;Acc:ZDB-GENE-030131-2042]
ENSDARG00000008247	vezf1a	protein_coding	10	vascular endothelial zinc finger 1a [Source:ZFIN;Acc:ZDB-GENE-040108-4]
ENSDARG00000008372	spred2b	protein_coding	13	sprouty-related, EVH1 domain containing 2b [Source:ZFIN;Acc:ZDB-GENE-040426-2342]
ENSDARG00000008377	epn2	protein_coding	3	epsin 2 [Source:ZFIN;Acc:ZDB-GENE-071212-1]
ENSDARG00000008398	cacna1c	protein_coding	4	calcium channel, voltage-dependent, L type, alpha 1C subunit [Source:ZFIN;Acc:ZDB-GENE-020129-1]
ENSDARG00000008542	yod1	protein_coding	11	YOD1 deubiquitinase [Source:ZFIN;Acc:ZDB-GENE-050417-217]
ENSDARG00000008772	cacng1a	protein_coding	6	calcium channel, voltage-dependent, gamma subunit 1a [Source:ZFIN;Acc:ZDB-GENE-030131-732]
ENSDARG00000008849	ptprq	protein_coding	18	protein tyrosine phosphatase, receptor type, Q [Source:ZFIN;Acc:ZDB-GENE-050419-183]
ENSDARG00000008886	msx1b	protein_coding	1	muscle segment homeobox 1b [Source:ZFIN;Acc:ZDB-GENE-980526-26]
ENSDARG00000008946	ccdc127b	protein_coding	19	coiled-coil domain containing 127b [Source:ZFIN;Acc:ZDB-GENE-060503-656]
ENSDARG00000009281	dnm1b	protein_coding	5	dynamin 1b [Source:ZFIN;Acc:ZDB-GENE-100920-3]
ENSDARG00000009401	vcanb	protein_coding	10	versican b [Source:ZFIN;Acc:ZDB-GENE-030131-2185]
ENSDARG00000009466	rgs9bp	protein_coding	7	regulator of G protein signaling 9 binding protein [Source:ZFIN;Acc:ZDB-GENE-030728-1]
ENSDARG00000009626	nrbp2b	protein_coding	24	nuclear receptor binding protein 2b [Source:ZFIN;Acc:ZDB-GENE-080724-1]
ENSDARG00000009870	mapk8b	protein_coding	12	mitogen-activated protein kinase 8b [Source:ZFIN;Acc:ZDB-GENE-010202-1]
ENSDARG00000009874	cyp2k6	protein_coding	3	cytochrome P450, family 2, subfamily K, polypeptide 6 [Source:ZFIN;Acc:ZDB-GENE-040426-1571]
ENSDARG00000009941	erc1a	protein_coding	25	ELKS/RAB6-interacting/CAST family member 1a [Source:ZFIN;Acc:ZDB-GENE-091214-5]
ENSDARG00000010018	qki2	protein_coding	12	QKI, KH domain containing, RNA binding 2 [Source:ZFIN;Acc:ZDB-GENE-040426-1462]
ENSDARG00000010181	asap2a	protein_coding	17	ArfGAP with SH3 domain, ankyrin repeat and PH domain 2a [Source:ZFIN;Acc:ZDB-GENE-041210-256]
ENSDARG00000010270	fezf1	protein_coding	25	FEZ family zinc finger 1 [Source:ZFIN;Acc:ZDB-GENE-060929-970]
ENSDARG00000010317	gpr183a	protein_coding	9	G protein-coupled receptor 183a [Source:ZFIN;Acc:ZDB-GENE-070615-28]
ENSDARG00000010408	igsf9b	protein_coding	8	immunoglobulin superfamily, member 9b [Source:ZFIN;Acc:ZDB-GENE-060810-28]
ENSDARG00000010454	guca1a	protein_coding	4	guanylate cyclase activator 1A [Source:ZFIN;Acc:ZDB-GENE-011128-5]
ENSDARG00000010515	dvl1a	protein_coding	23	dishevelled segment polarity protein 1a [Source:ZFIN;Acc:ZDB-GENE-090312-40]
ENSDARG00000010764	flj13639	protein_coding	15	flj13639 [Source:ZFIN;Acc:ZDB-GENE-030131-8104]
ENSDARG00000010977	rab34b	protein_coding	21	RAB34, member RAS oncogene family b [Source:ZFIN;Acc:ZDB-GENE-091118-61]
ENSDARG00000011042	pgbd5	protein_coding	13	piggyBac transposable element derived 5 [Source:ZFIN;Acc:ZDB-GENE-040724-229]
ENSDARG00000011473	calcrla	protein_coding	9	calcitonin receptor-like a [Source:ZFIN;Acc:ZDB-GENE-040822-26]
ENSDARG00000011537	ugt2a5	protein_coding	5	UDP glucuronosyltransferase 2 family, polypeptide A5 [Source:ZFIN;Acc:ZDB-GENE-060929-796]
ENSDARG00000011582	sox5	protein_coding	4	SRY (sex determining region Y)-box 5 [Source:ZFIN;Acc:ZDB-GENE-000607-13]
ENSDARG00000011600	epha4b	protein_coding	2	eph receptor A4b [Source:ZFIN;Acc:ZDB-GENE-030826-6]
ENSDARG00000011724	marveld1	protein_coding	13	MARVEL domain containing 1 [Source:ZFIN;Acc:ZDB-GENE-050208-33]
ENSDARG00000011801	wars2	protein_coding	9	tryptophanyl tRNA synthetase 2, mitochondrial [Source:ZFIN;Acc:ZDB-GENE-050306-26]
ENSDARG00000011973	slc35d1a	protein_coding	6	solute carrier family 35 (UDP-GlcA/UDP-GalNAc transporter), member D1a [Source:ZFIN;Acc:ZDB-GENE-040826-5]
ENSDARG00000012060	thbs3b	protein_coding	19	thrombospondin 3b [Source:ZFIN;Acc:ZDB-GENE-060503-84]
ENSDARG00000012071	angptl1a	protein_coding	20	angiopoietin-like 1a [Source:ZFIN;Acc:ZDB-GENE-040724-269]
ENSDARG00000012125	cnga1	protein_coding	23	cyclic nucleotide gated channel alpha 1 [Source:ZFIN;Acc:ZDB-GENE-110408-39]
ENSDARG00000012126	zgc:109965	protein_coding	21	zgc:109965 [Source:ZFIN;Acc:ZDB-GENE-050913-21]
ENSDARG00000012353	vipr2	protein_coding	24	vasoactive intestinal peptide receptor 2 [Source:ZFIN;Acc:ZDB-GENE-010406-4]
ENSDARG00000012366	fbp2	protein_coding	5	fructose-1,6-bisphosphatase 2 [Source:ZFIN;Acc:ZDB-GENE-040822-23]
ENSDARG00000012426	neflb	protein_coding	8	neurofilament, light polypeptide b [Source:ZFIN;Acc:ZDB-GENE-060312-44]
ENSDARG00000013000	ppfia2	protein_coding	4	protein tyrosine phosphatase, receptor type, f polypeptide (PTPRF), interacting protein (liprin), alpha 2 [Source:ZFIN;Acc:ZDB-GENE-030131-7905]
ENSDARG00000013310	map3k15	protein_coding	24	mitogen-activated protein kinase kinase kinase 15 [Source:ZFIN;Acc:ZDB-GENE-091204-246]
ENSDARG00000013438	sycp3	protein_coding	25	synaptonemal complex protein 3 [Source:ZFIN;Acc:ZDB-GENE-040910-2]
ENSDARG00000013461	supt7l	protein_coding	17	SPT7-like STAGA complex gamma subunit [Source:ZFIN;Acc:ZDB-GENE-050227-17]
ENSDARG00000013596	brd1a	protein_coding	4	bromodomain containing 1a [Source:ZFIN;Acc:ZDB-GENE-041008-168]
ENSDARG00000013667	tbck	protein_coding	1	TBC1 domain containing kinase [Source:ZFIN;Acc:ZDB-GENE-070112-1062]
ENSDARG00000013834	arhgef3	protein_coding	22	Rho guanine nucleotide exchange factor (GEF) 3 [Source:ZFIN;Acc:ZDB-GENE-050208-773]
ENSDARG00000014058	rab36	protein_coding	10	RAB36, member RAS oncogene family [Source:ZFIN;Acc:ZDB-GENE-040910-5]
ENSDARG00000014083	wdr82	protein_coding	6	WD repeat domain 82 [Source:ZFIN;Acc:ZDB-GENE-030131-333]
ENSDARG00000014218	mecp2	protein_coding	8	methyl CpG binding protein 2 [Source:ZFIN;Acc:ZDB-GENE-030131-7190]
ENSDARG00000014244	rbmx	protein_coding	14	RNA binding motif protein, X-linked [Source:ZFIN;Acc:ZDB-GENE-030131-579]
ENSDARG00000014292	med15	protein_coding	21	mediator complex subunit 15 [Source:ZFIN;Acc:ZDB-GENE-040426-2032]
ENSDARG00000014954	snx33	protein_coding	25	sorting nexin 33 [Source:ZFIN;Acc:ZDB-GENE-041111-209]
ENSDARG00000014962	ppp3cca	protein_coding	5	protein phosphatase 3, catalytic subunit, gamma isozyme, a [Source:ZFIN;Acc:ZDB-GENE-030829-36]
ENSDARG00000014976	lims2	protein_coding	9	LIM and senescent cell antigen-like domains 2 [Source:ZFIN;Acc:ZDB-GENE-050522-56]
ENSDARG00000015010	ccdc114	protein_coding	11	coiled-coil domain containing 114 [Source:ZFIN;Acc:ZDB-GENE-041114-110]
ENSDARG00000015053	grip1	protein_coding	4	glutamate receptor interacting protein 1 [Source:ZFIN;Acc:ZDB-GENE-041210-125]
ENSDARG00000015355	fosl1a	protein_coding	14	FOS-like antigen 1a [Source:ZFIN;Acc:ZDB-GENE-061207-7]
ENSDARG00000015476	iqch	protein_coding	18	IQ motif containing H [Source:ZFIN;Acc:ZDB-GENE-050419-242]
ENSDARG00000015552	phactr4a	protein_coding	19	phosphatase and actin regulator 4a [Source:ZFIN;Acc:ZDB-GENE-051030-69]
ENSDARG00000015554	zic2a	protein_coding	9	zic family member 2 (odd-paired homolog, Drosophila), a [Source:ZFIN;Acc:ZDB-GENE-000710-4]
ENSDARG00000015985	abcc9	protein_coding	4	ATP-binding cassette, sub-family C (CFTR/MRP), member 9 [Source:ZFIN;Acc:ZDB-GENE-050517-23]
ENSDARG00000016531	klhl4	protein_coding	14	kelch-like family member 4 [Source:ZFIN;Acc:ZDB-GENE-070410-63]
ENSDARG00000016532	suco	protein_coding	20	SUN domain containing ossification factor [Source:ZFIN;Acc:ZDB-GENE-030131-2941]
ENSDARG00000016651	znf106a	protein_coding	17	zinc finger protein 106a [Source:ZFIN;Acc:ZDB-GENE-040718-21]
ENSDARG00000016699	trpa1a	protein_coding	2	transient receptor potential cation channel, subfamily A, member 1a [Source:ZFIN;Acc:ZDB-GENE-050105-6]
ENSDARG00000016835	tcirg1a	protein_coding	1	T cell immune regulator 1, ATPase H+ transporting V0 subunit a3a [Source:ZFIN;Acc:ZDB-GENE-090311-31]
ENSDARG00000016981	bcar3	protein_coding	8	BCAR3, NSP family adaptor protein [Source:ZFIN;Acc:ZDB-GENE-080513-4]
ENSDARG00000017038	zgc:152670	protein_coding	2	zgc:152670 [Source:ZFIN;Acc:ZDB-GENE-060929-954]
ENSDARG00000017107	nr2e1	protein_coding	20	nuclear receptor subfamily 2, group E, member 1 [Source:ZFIN;Acc:ZDB-GENE-040801-127]
ENSDARG00000017155	wnt10a	protein_coding	9	wingless-type MMTV integration site family, member 10a [Source:ZFIN;Acc:ZDB-GENE-990415-278]
ENSDARG00000017329	cdkl1	protein_coding	13	cyclin-dependent kinase-like 1 (CDC2-related kinase) [Source:ZFIN;Acc:ZDB-GENE-040808-34]
ENSDARG00000017354	epha2a	protein_coding	6	eph receptor A2 a [Source:ZFIN;Acc:ZDB-GENE-990415-63]
ENSDARG00000017369	sema3d	protein_coding	18	sema domain, immunoglobulin domain (Ig), short basic domain, secreted, (semaphorin) 3D [Source:ZFIN;Acc:ZDB-GENE-990715-2]
ENSDARG00000017400	klf1	protein_coding	6	Kruppel-like factor 1 (erythroid) [Source:ZFIN;Acc:ZDB-GENE-980526-55]
ENSDARG00000017617	alg6	protein_coding	6	asparagine-linked glycosylation 6 (alpha-1,3,-glucosyltransferase) [Source:ZFIN;Acc:ZDB-GENE-040808-45]
ENSDARG00000017673	nova2	protein_coding	15	neuro-oncological ventral antigen 2 [Source:ZFIN;Acc:ZDB-GENE-080211-1]
ENSDARG00000017739	ak5l	protein_coding	5	adenylate kinase 5, like [Source:ZFIN;Acc:ZDB-GENE-050410-2]
ENSDARG00000017773	slc16a12a	protein_coding	17	solute carrier family 16, member 12a [Source:ZFIN;Acc:ZDB-GENE-080721-24]
ENSDARG00000017884	bgna	protein_coding	8	biglycan a [Source:ZFIN;Acc:ZDB-GENE-040704-74]
ENSDARG00000017988	dse	protein_coding	20	dermatan sulfate epimerase [Source:ZFIN;Acc:ZDB-GENE-041001-202]
ENSDARG00000018327	illr3	protein_coding	19	immune-related, lectin-like receptor 3 [Source:ZFIN;Acc:ZDB-GENE-050311-4]
ENSDARG00000018399	rps6kb1a	protein_coding	10	ribosomal protein S6 kinase b, polypeptide 1a [Source:ZFIN;Acc:ZDB-GENE-091113-52]
ENSDARG00000018521	or115-1	protein_coding	21	odorant receptor, family F, subfamily 115, member 1 [Source:ZFIN;Acc:ZDB-GENE-010309-2]
ENSDARG00000018534	slc6a9	protein_coding	2	solute carrier family 6 (neurotransmitter transporter, glycine), member 9 [Source:ZFIN;Acc:ZDB-GENE-050105-3]
ENSDARG00000018566	flnca	protein_coding	25	filamin C, gamma a (actin binding protein 280) [Source:ZFIN;Acc:ZDB-GENE-070503-1]
ENSDARG00000018726	slco3a1	protein_coding	18	solute carrier organic anion transporter family, member 3A1 [Source:ZFIN;Acc:ZDB-GENE-030131-8662]
ENSDARG00000018750	npr1b	protein_coding	16	natriuretic peptide receptor 1b [Source:ZFIN;Acc:ZDB-GENE-100805-4]
ENSDARG00000018765	pknox1.1	protein_coding	9	pbx/knotted 1 homeobox 1.1 [Source:ZFIN;Acc:ZDB-GENE-020122-5]
ENSDARG00000018825	tmem248	protein_coding	5	transmembrane protein 248 [Source:ZFIN;Acc:ZDB-GENE-050320-103]
ENSDARG00000019117	parvb	protein_coding	25	parvin, beta [Source:ZFIN;Acc:ZDB-GENE-030131-4411]
ENSDARG00000019128	tpm4b	protein_coding	2	tropomyosin 4b [Source:ZFIN;Acc:ZDB-GENE-030131-2964]
ENSDARG00000019585	gstk2	protein_coding	16	glutathione S-transferase kappa 2 [Source:ZFIN;Acc:ZDB-GENE-100922-14]
ENSDARG00000020122	endou2	protein_coding	21	endonuclease, polyU-specific 2 [Source:ZFIN;Acc:ZDB-GENE-050522-373]
ENSDARG00000020149	acoxl	protein_coding	13	acyl-CoA oxidase-like [Source:ZFIN;Acc:ZDB-GENE-081107-18]
ENSDARG00000020242	fermt2	protein_coding	17	fermitin family member 2 [Source:ZFIN;Acc:ZDB-GENE-050506-132]
ENSDARG00000020250	rhoj	protein_coding	20	ras homolog family member J [Source:ZFIN;Acc:ZDB-GENE-040724-272]
ENSDARG00000020509	srd5a1	protein_coding	19	steroid-5-alpha-reductase, alpha polypeptide 1 (3-oxo-5 alpha-steroid delta 4-dehydrogenase alpha 1) [Source:ZFIN;Acc:ZDB-GENE-060929-938]
ENSDARG00000020758	tmem178	protein_coding	11	transmembrane protein 178 [Source:ZFIN;Acc:ZDB-GENE-060929-756]
ENSDARG00000020890	tmod4	protein_coding	16	tropomodulin 4 (muscle) [Source:ZFIN;Acc:ZDB-GENE-991019-9]
ENSDARG00000021150	valopa	protein_coding	13	vertebrate ancient long opsin a [Source:ZFIN;Acc:ZDB-GENE-000427-4]
ENSDARG00000021151	ptpreb	protein_coding	17	protein tyrosine phosphatase, receptor type, E, b [Source:ZFIN;Acc:ZDB-GENE-060503-263]
ENSDARG00000021154	zgc:92040	protein_coding	12	zgc:92040 [Source:ZFIN;Acc:ZDB-GENE-040718-87]
ENSDARG00000021688	mxa	protein_coding	1	myxovirus (influenza) resistance A [Source:ZFIN;Acc:ZDB-GENE-030721-5]
ENSDARG00000021735	cacna1ba	protein_coding	5	calcium channel, voltage-dependent, N type, alpha 1B subunit, a [Source:ZFIN;Acc:ZDB-GENE-060531-44]
ENSDARG00000021789	myoc	protein_coding	20	myocilin [Source:ZFIN;Acc:ZDB-GENE-050425-2]
ENSDARG00000021869	rcan2	protein_coding	20	regulator of calcineurin 2 [Source:ZFIN;Acc:ZDB-GENE-040516-17]
ENSDARG00000021895	disc1	protein_coding	13	disrupted in schizophrenia 1 [Source:ZFIN;Acc:ZDB-GENE-090122-1]
ENSDARG00000022020	focad	protein_coding	7	focadhesin [Source:ZFIN;Acc:ZDB-GENE-080213-1]
ENSDARG00000022187	usp6nl	protein_coding	4	USP6 N-terminal like [Source:ZFIN;Acc:ZDB-GENE-041210-192]
ENSDARG00000022260	si:ch211-57i17.1	protein_coding	20	si:ch211-57i17.1 [Source:ZFIN;Acc:ZDB-GENE-041014-259]
ENSDARG00000022512	zgc:109913	protein_coding	6	zgc:109913 [Source:ZFIN;Acc:ZDB-GENE-050522-72]
ENSDARG00000022895	mcf2a	protein_coding	14	MCF.2 cell line derived transforming sequence a [Source:ZFIN;Acc:ZDB-GENE-030616-52]
ENSDARG00000023214	mob2a	protein_coding	25	MOB kinase activator 2a [Source:ZFIN;Acc:ZDB-GENE-040718-56]
ENSDARG00000023484	rflna	protein_coding	8	refilin A [Source:ZFIN;Acc:ZDB-GENE-030616-80]
ENSDARG00000023771	gabrb3	protein_coding	6	gamma-aminobutyric acid (GABA) A receptor, beta 3 [Source:ZFIN;Acc:ZDB-GENE-101102-2]
ENSDARG00000023861	dnase1l1l	protein_coding	8	deoxyribonuclease I-like 1-like [Source:ZFIN;Acc:ZDB-GENE-040718-100]
ENSDARG00000024306	zbed4	protein_coding	4	zinc finger, BED-type containing 4 [Source:ZFIN;Acc:ZDB-GENE-041210-305]
ENSDARG00000024537	emilin1a	protein_coding	20	elastin microfibril interfacer 1a [Source:ZFIN;Acc:ZDB-GENE-041001-191]
ENSDARG00000024546	pla2g4aa	protein_coding	2	phospholipase A2, group IVAa (cytosolic, calcium-dependent) [Source:ZFIN;Acc:ZDB-GENE-990415-45]
ENSDARG00000024548	cryba4	protein_coding	10	crystallin, beta A4 [Source:ZFIN;Acc:ZDB-GENE-050522-143]
ENSDARG00000024687	polr3g	protein_coding	5	polymerase (RNA) III (DNA directed) polypeptide G [Source:ZFIN;Acc:ZDB-GENE-081104-312]
ENSDARG00000025089	loxl4	protein_coding	13	lysyl oxidase-like 4 [Source:ZFIN;Acc:ZDB-GENE-080722-19]
ENSDARG00000025162	asic4a	protein_coding	9	acid-sensing (proton-gated) ion channel family member 4a [Source:ZFIN;Acc:ZDB-GENE-040513-5]
ENSDARG00000025212	ints11	protein_coding	23	integrator complex subunit 11 [Source:ZFIN;Acc:ZDB-GENE-050522-13]
ENSDARG00000025468	bnip3la	protein_coding	8	BCL2 interacting protein 3 like a [Source:ZFIN;Acc:ZDB-GENE-030131-2283]
ENSDARG00000025808	taf5l	protein_coding	1	TAF5-like RNA polymerase II, p300/CBP-associated factor (PCAF)-associated factor [Source:ZFIN;Acc:ZDB-GENE-030131-5987]
ENSDARG00000025875	kctd2	protein_coding	12	potassium channel tetramerization domain containing 2 [Source:ZFIN;Acc:ZDB-GENE-060825-85]
ENSDARG00000026166	emilin1b	protein_coding	17	elastin microfibril interfacer 1b [Source:ZFIN;Acc:ZDB-GENE-060818-36]
ENSDARG00000026313	adgre5a	protein_coding	3	adhesion G protein-coupled receptor E5a [Source:ZFIN;Acc:ZDB-GENE-130530-571]
ENSDARG00000026417	ccr12b.2	protein_coding	24	chemokine (C-C motif) receptor 12b, tandem duplicate 2 [Source:ZFIN;Acc:ZDB-GENE-070301-2]
ENSDARG00000026519	ralgps2	protein_coding	20	Ral GEF with PH domain and SH3 binding motif 2 [Source:ZFIN;Acc:ZDB-GENE-040426-1212]
ENSDARG00000026840	arhgap23b	protein_coding	12	Rho GTPase activating protein 23b [Source:ZFIN;Acc:ZDB-GENE-081031-78]
ENSDARG00000026925	nos2a	protein_coding	5	nitric oxide synthase 2a, inducible [Source:ZFIN;Acc:ZDB-GENE-040305-1]
ENSDARG00000027016	gbf1	protein_coding	13	golgi brefeldin A resistant guanine nucleotide exchange factor 1 [Source:ZFIN;Acc:ZDB-GENE-081107-54]
ENSDARG00000027041	pcdh17	protein_coding	11	protocadherin 17 [Source:ZFIN;Acc:ZDB-GENE-090608-3]
ENSDARG00000027082	hmbox1a	protein_coding	17	homeobox containing 1a [Source:ZFIN;Acc:ZDB-GENE-050913-89]
ENSDARG00000027279	numb	protein_coding	17	numb homolog (Drosophila) [Source:ZFIN;Acc:ZDB-GENE-060422-1]
ENSDARG00000027424	slc25a3a	protein_coding	4	solute carrier family 25 (mitochondrial carrier; phosphate carrier), member 3a [Source:ZFIN;Acc:ZDB-GENE-040426-1673]
ENSDARG00000027428	rpp30	protein_coding	12	ribonuclease P/MRP 30 subunit [Source:ZFIN;Acc:ZDB-GENE-050320-45]
ENSDARG00000027582	angptl7	protein_coding	8	angiopoietin-like 7 [Source:ZFIN;Acc:ZDB-GENE-041010-175]
ENSDARG00000027907	si:ch211-216p19.6	protein_coding	7	si:ch211-216p19.6 [Source:ZFIN;Acc:ZDB-GENE-160728-7]
ENSDARG00000028096	si:ch211-95j8.2	protein_coding	10	si:ch211-95j8.2 [Source:ZFIN;Acc:ZDB-GENE-091204-28]
ENSDARG00000028173	slc4a2a	protein_coding	2	solute carrier family 4 (anion exchanger), member 2a [Source:ZFIN;Acc:ZDB-GENE-051101-2]
ENSDARG00000028949	ZBTB26	protein_coding	5	si:ch211-236k19.4 [Source:ZFIN;Acc:ZDB-GENE-060526-122]
ENSDARG00000029168	ppfibp2b	protein_coding	25	PTPRF interacting protein, binding protein 2b (liprin beta 2) [Source:ZFIN;Acc:ZDB-GENE-040718-54]
ENSDARG00000029474	camk1b	protein_coding	11	calcium/calmodulin-dependent protein kinase Ib [Source:ZFIN;Acc:ZDB-GENE-141014-1]
ENSDARG00000029544	id2b	protein_coding	20	inhibitor of DNA binding 2b [Source:ZFIN;Acc:ZDB-GENE-030131-15]
ENSDARG00000029766	nr1i2	protein_coding	9	nuclear receptor subfamily 1, group I, member 2 [Source:ZFIN;Acc:ZDB-GENE-030903-3]
ENSDARG00000030239	dennd6aa	protein_coding	11	DENN/MADD domain containing 6Aa [Source:ZFIN;Acc:ZDB-GENE-041010-63]
ENSDARG00000030604	phkg1a	protein_coding	15	phosphorylase kinase, gamma 1a (muscle) [Source:ZFIN;Acc:ZDB-GENE-061103-385]
ENSDARG00000030650	r3hdml	protein_coding	23	R3H domain containing-like [Source:ZFIN;Acc:ZDB-GENE-090313-275]
ENSDARG00000030656	sept3	protein_coding	1	septin 3 [Source:ZFIN;Acc:ZDB-GENE-050522-375]
ENSDARG00000030723	cldn11b	protein_coding	24	claudin 11b [Source:ZFIN;Acc:ZDB-GENE-010328-13]
ENSDARG00000030803	zgc:110006	protein_coding	10	zgc:110006 [Source:ZFIN;Acc:ZDB-GENE-050522-119]
ENSDARG00000031420	wt1a	protein_coding	25	wilms tumor 1a [Source:ZFIN;Acc:ZDB-GENE-980526-558]
ENSDARG00000031548	ephb3a	protein_coding	2	eph receptor B3a [Source:ZFIN;Acc:ZDB-GENE-990415-60]
ENSDARG00000031598	calb1	protein_coding	16	calbindin 1 [Source:ZFIN;Acc:ZDB-GENE-030131-8107]
ENSDARG00000031600	rd3	protein_coding	20	retinal degeneration 3 [Source:ZFIN;Acc:ZDB-GENE-040724-103]
ENSDARG00000031657	fahd1	protein_coding	3	fumarylacetoacetate hydrolase domain containing 1 [Source:ZFIN;Acc:ZDB-GENE-050522-448]
ENSDARG00000031796	ache	protein_coding	7	acetylcholinesterase [Source:ZFIN;Acc:ZDB-GENE-010906-1]
ENSDARG00000031845	mboat2a	protein_coding	17	membrane bound O-acyltransferase domain containing 2a [Source:ZFIN;Acc:ZDB-GENE-041210-257]
ENSDARG00000031848	pparg	protein_coding	11	peroxisome proliferator-activated receptor gamma [Source:ZFIN;Acc:ZDB-GENE-990415-213]
ENSDARG00000032103	mapk6	protein_coding	18	mitogen-activated protein kinase 6 [Source:ZFIN;Acc:ZDB-GENE-050420-7]
ENSDARG00000032552	march5	protein_coding	13	membrane-associated ring finger (C3HC4) 5 [Source:ZFIN;Acc:ZDB-GENE-070424-47]
ENSDARG00000032795	tmem8a	protein_coding	1	transmembrane protein 8A [Source:ZFIN;Acc:ZDB-GENE-090312-158]
ENSDARG00000032801	grk5	protein_coding	10	G protein-coupled receptor kinase 5 [Source:ZFIN;Acc:ZDB-GENE-091204-274]
ENSDARG00000032963	her12	protein_coding	23	hairy-related 12 [Source:ZFIN;Acc:ZDB-GENE-040824-5]
ENSDARG00000033099	kif7	protein_coding	7	kinesin family member 7 [Source:ZFIN;Acc:ZDB-GENE-050307-1]
ENSDARG00000033380	gyg2	protein_coding	1	glycogenin 2 [Source:ZFIN;Acc:ZDB-GENE-080723-74]
ENSDARG00000033953	entpd2a.2	protein_coding	5	ectonucleoside triphosphate diphosphohydrolase 2a, tandem duplicate 2 [Source:ZFIN;Acc:ZDB-GENE-040724-67]
ENSDARG00000034107	actl6b	protein_coding	23	actin-like 6B [Source:ZFIN;Acc:ZDB-GENE-050522-191]
ENSDARG00000034423	sncga	protein_coding	13	synuclein, gamma a [Source:ZFIN;Acc:ZDB-GENE-050417-18]
ENSDARG00000034424	atp1b2b	protein_coding	5	ATPase Na+/K+ transporting subunit beta 2b [Source:ZFIN;Acc:ZDB-GENE-010718-1]
ENSDARG00000034541	tgfbr2b	protein_coding	16	transforming growth factor beta receptor 2b [Source:ZFIN;Acc:ZDB-GENE-980526-375]
ENSDARG00000034572	gpr143	protein_coding	9	G protein-coupled receptor 143 [Source:ZFIN;Acc:ZDB-GENE-040426-1476]
ENSDARG00000034714	esyt1a	protein_coding	23	extended synaptotagmin-like protein 1a [Source:ZFIN;Acc:ZDB-GENE-090311-55]
ENSDARG00000034717	def6c	protein_coding	4	differentially expressed in FDCP 6c homolog [Source:ZFIN;Acc:ZDB-GENE-060503-87]
ENSDARG00000035163	tmem136b	protein_coding	5	transmembrane protein 136b [Source:ZFIN;Acc:ZDB-GENE-040718-455]
ENSDARG00000035308	grb10b	protein_coding	16	growth factor receptor-bound protein 10b [Source:ZFIN;Acc:ZDB-GENE-091020-12]
ENSDARG00000035390	tnpo1	protein_coding	5	transportin 1 [Source:ZFIN;Acc:ZDB-GENE-080819-1]
ENSDARG00000035468	slc25a25b	protein_coding	5	solute carrier family 25 (mitochondrial carrier; phosphate carrier), member 25b [Source:ZFIN;Acc:ZDB-GENE-060526-340]
ENSDARG00000035538	atp6v0a2a	protein_coding	10	ATPase H+ transporting V0 subunit a2a [Source:ZFIN;Acc:ZDB-GENE-091113-4]
ENSDARG00000035551	iqcd	protein_coding	5	IQ motif containing D [Source:ZFIN;Acc:ZDB-GENE-060526-200]
ENSDARG00000035578	hs3st1l2	protein_coding	5	heparan sulfate (glucosamine) 3-O-sulfotransferase 1-like 2 [Source:ZFIN;Acc:ZDB-GENE-070202-3]
ENSDARG00000035609	mtnr1c	protein_coding	5	melatonin receptor 1C [Source:ZFIN;Acc:ZDB-GENE-990415-158]
ENSDARG00000035694	stm	protein_coding	19	starmaker [Source:ZFIN;Acc:ZDB-GENE-031112-4]
ENSDARG00000035695	scxa	protein_coding	19	scleraxis bHLH transcription factor a [Source:ZFIN;Acc:ZDB-GENE-060503-414]
ENSDARG00000035904	crabp1b	protein_coding	7	cellular retinoic acid binding protein 1b [Source:ZFIN;Acc:ZDB-GENE-040624-3]
ENSDARG00000036063	ppp1r11	protein_coding	19	protein phosphatase 1, regulatory (inhibitor) subunit 11 [Source:ZFIN;Acc:ZDB-GENE-050417-99]
ENSDARG00000036125	nitr13	protein_coding	14	novel immune-type receptor 13 [Source:ZFIN;Acc:ZDB-GENE-070108-2]
ENSDARG00000036147	ano5b	protein_coding	7	anoctamin 5b [Source:ZFIN;Acc:ZDB-GENE-061215-108]
ENSDARG00000036156	fnbp1a	protein_coding	8	formin binding protein 1a [Source:ZFIN;Acc:ZDB-GENE-081105-105]
ENSDARG00000036375	cyfip2	protein_coding	14	cytoplasmic FMR1 interacting protein 2 [Source:ZFIN;Acc:ZDB-GENE-080724-2]
ENSDARG00000036412	si:ch211-81a5.5	protein_coding	19	si:ch211-81a5.5 [Source:ZFIN;Acc:ZDB-GENE-060503-892]
ENSDARG00000036415	glb1	protein_coding	1	galactosidase, beta 1 [Source:ZFIN;Acc:ZDB-GENE-050410-9]
ENSDARG00000036499	zgc:162171	protein_coding	7	zgc:162171 [Source:ZFIN;Acc:ZDB-GENE-070424-24]
ENSDARG00000036558	col18a1a	protein_coding	9	collagen type XVIII alpha 1 chain a [Source:ZFIN;Acc:ZDB-GENE-030516-3]
ENSDARG00000036987	has2	protein_coding	16	hyaluronan synthase 2 [Source:ZFIN;Acc:ZDB-GENE-020828-1]
ENSDARG00000037040	cgrrf1	protein_coding	20	cell growth regulator with ring finger domain 1 [Source:ZFIN;Acc:ZDB-GENE-040724-100]
ENSDARG00000037199	zgc:101851	protein_coding	9	zgc:101851 [Source:ZFIN;Acc:ZDB-GENE-040912-123]
ENSDARG00000037245	trmo	protein_coding	1	tRNA methyltransferase O [Source:ZFIN;Acc:ZDB-GENE-051023-15]
ENSDARG00000037390	gsg1l	protein_coding	3	gsg1-like [Source:ZFIN;Acc:ZDB-GENE-050913-27]
ENSDARG00000037427	si:ch211-39a7.1	protein_coding	19	si:ch211-39a7.1 [Source:ZFIN;Acc:ZDB-GENE-060503-606]
ENSDARG00000037598	prf1.5	protein_coding	8	perforin 1.5 [Source:ZFIN;Acc:ZDB-GENE-081105-3]
ENSDARG00000037804	phlda3	protein_coding	23	pleckstrin homology-like domain, family A, member 3 [Source:ZFIN;Acc:ZDB-GENE-030616-267]
ENSDARG00000037813	zgc:113278	protein_coding	23	zgc:113278 [Source:ZFIN;Acc:ZDB-GENE-050327-66]
ENSDARG00000037954	tnnt1	protein_coding	3	troponin T type 1 (skeletal, slow) [Source:ZFIN;Acc:ZDB-GENE-080723-27]
ENSDARG00000037963	nek6	protein_coding	21	NIMA-related kinase 6 [Source:ZFIN;Acc:ZDB-GENE-040724-133]
ENSDARG00000037968	fus	protein_coding	3	FUS RNA binding protein [Source:ZFIN;Acc:ZDB-GENE-040426-1010]
ENSDARG00000038069	mgat3a	protein_coding	3	mannosyl (beta-1,4-)-glycoprotein beta-1,4-N-acetylglucosaminyltransferase a [Source:ZFIN;Acc:ZDB-GENE-050522-249]
ENSDARG00000038302	ccar2	protein_coding	10	cell cycle and apoptosis regulator 2 [Source:ZFIN;Acc:ZDB-GENE-091204-207]
ENSDARG00000038609	mpz	protein_coding	2	myelin protein zero [Source:ZFIN;Acc:ZDB-GENE-010724-4]
ENSDARG00000038658	cavin4a	protein_coding	2	caveolae associated protein 4a [Source:ZFIN;Acc:ZDB-GENE-050506-21]
ENSDARG00000038770	zgc:103625	protein_coding	3	zgc:103625 [Source:ZFIN;Acc:ZDB-GENE-040912-116]
ENSDARG00000038788	dnai1.2	protein_coding	21	dynein, axonemal, intermediate chain 1, paralog 2 [Source:ZFIN;Acc:ZDB-GENE-070112-1302]
ENSDARG00000038814	myrip	protein_coding	24	myosin VIIA and Rab interacting protein [Source:ZFIN;Acc:ZDB-GENE-080123-1]
ENSDARG00000039131	atp1a1a.3	protein_coding	1	ATPase Na+/K+ transporting subunit alpha 1a, tandem duplicate 3 [Source:ZFIN;Acc:ZDB-GENE-001212-3]
ENSDARG00000039241	prkca	protein_coding	CHR_ALT_CTG6_1_12	protein kinase C, alpha [Source:ZFIN;Acc:ZDB-GENE-050208-100]
ENSDARG00000039266	rbm25a	protein_coding	13	RNA binding motif protein 25a [Source:ZFIN;Acc:ZDB-GENE-090312-142]
ENSDARG00000039434	oprm1	protein_coding	13	opioid receptor, mu 1 [Source:ZFIN;Acc:ZDB-GENE-010125-1]
ENSDARG00000039436	il13ra2	protein_coding	5	interleukin 13 receptor, alpha 2 [Source:ZFIN;Acc:ZDB-GENE-030521-10]
ENSDARG00000039443	zgc:110353	protein_coding	8	zgc:110353 [Source:ZFIN;Acc:ZDB-GENE-050417-310]
ENSDARG00000039477	terb2	protein_coding	7	telomere repeat binding bouquet formation protein 2 [Source:ZFIN;Acc:ZDB-GENE-050320-30]
ENSDARG00000039482	calhm2	protein_coding	13	calcium homeostasis modulator 2 [Source:ZFIN;Acc:ZDB-GENE-030616-561]
ENSDARG00000039483	si:dkey-51a16.9	protein_coding	13	si:dkey-51a16.9 [Source:ZFIN;Acc:ZDB-GENE-030616-560]
ENSDARG00000039489	git1	protein_coding	15	G protein-coupled receptor kinase interacting ArfGAP 1 [Source:ZFIN;Acc:ZDB-GENE-100408-5]
ENSDARG00000039770	dync2li1	protein_coding	13	dynein, cytoplasmic 2, light intermediate chain 1 [Source:ZFIN;Acc:ZDB-GENE-040426-1230]
ENSDARG00000039871	rpz4	protein_coding	16	rapunzel 4 [Source:ZFIN;Acc:ZDB-GENE-050417-472]
ENSDARG00000040065	gja5a	protein_coding	9	gap junction protein, alpha 5a [Source:ZFIN;Acc:ZDB-GENE-040407-3]
ENSDARG00000040110	kif20bb	protein_coding	12	kinesin family member 20Bb [Source:ZFIN;Acc:ZDB-GENE-030131-9684]
ENSDARG00000040249	tlr18	protein_coding	16	toll-like receptor 18 [Source:ZFIN;Acc:ZDB-GENE-040220-2]
ENSDARG00000040487	zgc:113176	protein_coding	17	zgc:113176 [Source:ZFIN;Acc:ZDB-GENE-050327-60]
ENSDARG00000040523	smpd2a	protein_coding	23	sphingomyelin phosphodiesterase 2a, neutral membrane (neutral sphingomyelinase) [Source:ZFIN;Acc:ZDB-GENE-051014-1]
ENSDARG00000040700	nab1b	protein_coding	9	NGFI-A binding protein 1b (EGR1 binding protein 1) [Source:ZFIN;Acc:ZDB-GENE-081105-85]
ENSDARG00000041376	rmi1	protein_coding	8	RMI1, RecQ mediated genome instability 1, homolog (S. cerevisiae) [Source:ZFIN;Acc:ZDB-GENE-040426-829]
ENSDARG00000041502	tgfb1a	protein_coding	15	transforming growth factor, beta 1a [Source:ZFIN;Acc:ZDB-GENE-030618-1]
ENSDARG00000041560	si:dkey-102f14.5	protein_coding	18	si:dkey-102f14.5 [Source:ZFIN;Acc:ZDB-GENE-060503-705]
ENSDARG00000041919	ccl38.1	protein_coding	20	chemokine (C-C motif) ligand 38, duplicate 1 [Source:ZFIN;Acc:ZDB-GENE-041014-320]
ENSDARG00000041959	cxcr4b	protein_coding	9	chemokine (C-X-C motif), receptor 4b [Source:ZFIN;Acc:ZDB-GENE-010614-1]
ENSDARG00000042232	specc1lb	protein_coding	21	sperm antigen with calponin homology and coiled-coil domains 1-like b [Source:ZFIN;Acc:ZDB-GENE-090423-1]
ENSDARG00000042245	myl13	protein_coding	2	myosin, light chain 13 [Source:ZFIN;Acc:ZDB-GENE-040426-1593]
ENSDARG00000042249	FRMD4A	protein_coding	18	si:ch211-220f12.1 [Source:ZFIN;Acc:ZDB-GENE-050419-154]
ENSDARG00000042259	tgfbr1b	protein_coding	24	transforming growth factor, beta receptor 1 b [Source:ZFIN;Acc:ZDB-GENE-091027-1]
ENSDARG00000042521	si:dkey-251i10.1	protein_coding	5	si:dkey-251i10.1 [Source:ZFIN;Acc:ZDB-GENE-060531-122]
ENSDARG00000042555	dym	protein_coding	21	dymeclin [Source:ZFIN;Acc:ZDB-GENE-091204-348]
ENSDARG00000042683	si:dkey-15j16.3	protein_coding	20	si:dkey-15j16.3 [Source:ZFIN;Acc:ZDB-GENE-030131-4680]
ENSDARG00000042732	tmem189	protein_coding	8	transmembrane protein 189 [Source:ZFIN;Acc:ZDB-GENE-041010-150]
ENSDARG00000042742	stx6	protein_coding	22	syntaxin 6 [Source:ZFIN;Acc:ZDB-GENE-030131-858]
ENSDARG00000042956	cyp2ad6	protein_coding	20	cytochrome P450, family 2, subfamily AD, polypeptide 6 [Source:ZFIN;Acc:ZDB-GENE-041001-157]
ENSDARG00000042972	zgc:136605	protein_coding	8	zgc:136605 [Source:ZFIN;Acc:ZDB-GENE-060312-11]
ENSDARG00000042992	crygs1	protein_coding	22	crystallin, gamma S1 [Source:ZFIN;Acc:ZDB-GENE-050223-4]
ENSDARG00000043141	si:ch211-132f19.7	protein_coding	17	si:ch211-132f19.7 [Source:ZFIN;Acc:ZDB-GENE-130530-619]
ENSDARG00000043283	prrg1	protein_coding	8	proline rich Gla (G-carboxyglutamic acid) 1 [Source:ZFIN;Acc:ZDB-GENE-041010-20]
ENSDARG00000043285	zbtb21	protein_coding	10	zinc finger and BTB domain containing 21 [Source:ZFIN;Acc:ZDB-GENE-050411-7]
ENSDARG00000043394	si:dkey-71h2.2	protein_coding	20	si:dkey-71h2.2 [Source:ZFIN;Acc:ZDB-GENE-041014-145]
ENSDARG00000043593	rapgef1a	protein_coding	8	Rap guanine nucleotide exchange factor (GEF) 1a [Source:ZFIN;Acc:ZDB-GENE-081105-26]
ENSDARG00000043646	slc6a8	protein_coding	8	solute carrier family 6 (neurotransmitter transporter), member 8 [Source:ZFIN;Acc:ZDB-GENE-071024-2]
ENSDARG00000043673	si:dkey-174m14.3	protein_coding	20	si:dkey-174m14.3 [Source:ZFIN;Acc:ZDB-GENE-030131-8158]
ENSDARG00000043814	st6galnac1.1	protein_coding	12	ST6 (alpha-N-acetyl-neuraminyl-2,3-beta-galactosyl-1,3)-N-acetylgalactosaminide alpha-2,6-sialyltransferase 1, tandem duplicate 1 [Source:ZFIN;Acc:ZDB-GENE-041014-160]
ENSDARG00000043858	cdk19	protein_coding	20	cyclin-dependent kinase 19 [Source:ZFIN;Acc:ZDB-GENE-040724-19]
ENSDARG00000043923	sox9b	protein_coding	3	SRY (sex determining region Y)-box 9b [Source:ZFIN;Acc:ZDB-GENE-001103-2]
ENSDARG00000043932	stmn4l	protein_coding	17	stathmin-like 4, like [Source:ZFIN;Acc:ZDB-GENE-040718-301]
ENSDARG00000044010	loxl2a	protein_coding	10	lysyl oxidase-like 2a [Source:ZFIN;Acc:ZDB-GENE-070818-1]
ENSDARG00000044059	lft2	protein_coding	17	lefty2 [Source:ZFIN;Acc:ZDB-GENE-990630-11]
ENSDARG00000044144	wapla	protein_coding	17	WAPL cohesin release factor a [Source:ZFIN;Acc:ZDB-GENE-131010-1]
ENSDARG00000044155	mafaa	protein_coding	6	v-maf avian musculoaponeurotic fibrosarcoma oncogene homolog Aa [Source:ZFIN;Acc:ZDB-GENE-010605-3]
ENSDARG00000044179	rbms2a	protein_coding	11	RNA binding motif, single stranded interacting protein 2a [Source:ZFIN;Acc:ZDB-GENE-030912-2]
ENSDARG00000044276	spp1	protein_coding	10	secreted phosphoprotein 1 [Source:ZFIN;Acc:ZDB-GENE-050706-97]
ENSDARG00000044280	opn1mw2	protein_coding	6	opsin 1 (cone pigments), medium-wave-sensitive, 2 [Source:ZFIN;Acc:ZDB-GENE-030728-5]
ENSDARG00000044373	atg4c	protein_coding	6	autophagy related 4C, cysteine peptidase [Source:ZFIN;Acc:ZDB-GENE-040625-84]
ENSDARG00000044406	BX901950.1	protein_coding	CHR_ALT_CTG6_1_27
ENSDARG00000044615	zak	protein_coding	6	sterile alpha motif and leucine zipper containing kinase AZK [Source:ZFIN;Acc:ZDB-GENE-070912-386]
ENSDARG00000044766	mitd1	protein_coding	9	MIT, microtubule interacting and transport, domain containing 1 [Source:ZFIN;Acc:ZDB-GENE-040426-923]
ENSDARG00000044802	aadacl4	protein_coding	11	arylacetamide deacetylase-like 4 [Source:ZFIN;Acc:ZDB-GENE-080919-2]
ENSDARG00000044902	atp2b2	protein_coding	11	ATPase plasma membrane Ca2+ transporting 2 [Source:ZFIN;Acc:ZDB-GENE-061016-1]
ENSDARG00000044976	krt93	protein_coding	11	keratin 93 [Source:ZFIN;Acc:ZDB-GENE-060421-4592]
ENSDARG00000045038	tekt3	protein_coding	12	tektin 3 [Source:ZFIN;Acc:ZDB-GENE-080130-2]
ENSDARG00000045070	itgb3b	protein_coding	12	integrin beta 3b [Source:ZFIN;Acc:ZDB-GENE-071207-2]
ENSDARG00000045071	chad	protein_coding	12	chondroadherin [Source:ZFIN;Acc:ZDB-GENE-040426-1130]
ENSDARG00000045153	slc16a8	protein_coding	12	solute carrier family 16 (monocarboxylate transporter), member 8 [Source:ZFIN;Acc:ZDB-GENE-121128-1]
ENSDARG00000045175	pofut2	protein_coding	9	protein O-fucosyltransferase 2 [Source:ZFIN;Acc:ZDB-GENE-030131-3595]
ENSDARG00000045289	gpr137c	protein_coding	17	G protein-coupled receptor 137c [Source:ZFIN;Acc:ZDB-GENE-041114-145]
ENSDARG00000045401	mllt10	protein_coding	24	MLLT10, histone lysine methyltransferase DOT1L cofactor [Source:ZFIN;Acc:ZDB-GENE-041114-176]
ENSDARG00000045483	lrtm2a	protein_coding	4	leucine-rich repeats and transmembrane domains 2a [Source:ZFIN;Acc:ZDB-GENE-041210-218]
ENSDARG00000045510	tbc1d22a	protein_coding	4	TBC1 domain family, member 22a [Source:ZFIN;Acc:ZDB-GENE-041114-144]
ENSDARG00000045586	zgc:172145	protein_coding	25	zgc:172145 [Source:ZFIN;Acc:ZDB-GENE-080516-9]
ENSDARG00000045666	ANKRD50	protein_coding	14	ankyrin repeat domain 50 [Source:HGNC Symbol;Acc:HGNC:29223]
ENSDARG00000045675	mdm1	protein_coding	4	Mdm1 nuclear protein homolog (mouse) [Source:ZFIN;Acc:ZDB-GENE-041210-117]
ENSDARG00000045708	adm2a	protein_coding	4	adrenomedullin 2a [Source:ZFIN;Acc:ZDB-GENE-041210-100]
ENSDARG00000045842	zgc:113263	protein_coding	4	zgc:113263 [Source:ZFIN;Acc:ZDB-GENE-050306-34]
ENSDARG00000045936	pax6b	protein_coding	7	paired box 6b [Source:ZFIN;Acc:ZDB-GENE-001031-1]
ENSDARG00000045947	si:ch211-173d10.1	protein_coding	12	si:ch211-173d10.1 [Source:ZFIN;Acc:ZDB-GENE-121214-115]
ENSDARG00000051915	pde5ab	protein_coding	7	phosphodiesterase 5A, cGMP-specific, b [Source:ZFIN;Acc:ZDB-GENE-060824-4]
ENSDARG00000052037	trim35-1	protein_coding	1	tripartite motif containing 35-1 [Source:ZFIN;Acc:ZDB-GENE-050522-17]
ENSDARG00000052057	pcolceb	protein_coding	7	procollagen C-endopeptidase enhancer b [Source:ZFIN;Acc:ZDB-GENE-080722-44]
ENSDARG00000052094	notch1b	protein_coding	5	notch 1b [Source:ZFIN;Acc:ZDB-GENE-990415-183]
ENSDARG00000052242	aff2	protein_coding	14	AF4/FMR2 family, member 2 [Source:ZFIN;Acc:ZDB-GENE-110411-190]
ENSDARG00000052413	crfb12	protein_coding	5	cytokine receptor family member B12 [Source:ZFIN;Acc:ZDB-GENE-060421-4184]
ENSDARG00000052435	spred2a	protein_coding	1	sprouty-related, EVH1 domain containing 2a [Source:ZFIN;Acc:ZDB-GENE-110830-2]
ENSDARG00000052465	dusp10	protein_coding	20	dual specificity phosphatase 10 [Source:ZFIN;Acc:ZDB-GENE-041014-271]
ENSDARG00000052496	hmha1a	protein_coding	2	histocompatibility (minor) HA-1 a [Source:ZFIN;Acc:ZDB-GENE-140106-47]
ENSDARG00000052644	ca10a	protein_coding	12	carbonic anhydrase Xa [Source:ZFIN;Acc:ZDB-GENE-051030-123]
ENSDARG00000052688	paqr5b	protein_coding	7	progestin and adipoQ receptor family member Vb [Source:ZFIN;Acc:ZDB-GENE-040801-92]
ENSDARG00000052731	ankrd31	protein_coding	5	ankyrin repeat domain 31 [Source:ZFIN;Acc:ZDB-GENE-050417-473]
ENSDARG00000052748	capn1b	protein_coding	22	calpain 1, (mu/I) large subunit b [Source:ZFIN;Acc:ZDB-GENE-060503-491]
ENSDARG00000052954	rab25b	protein_coding	16	RAB25, member RAS oncogene family b [Source:ZFIN;Acc:ZDB-GENE-050706-113]
ENSDARG00000053260	zgc:113090	protein_coding	3	zgc:113090 [Source:ZFIN;Acc:ZDB-GENE-050522-532]
ENSDARG00000053512	crybb2	protein_coding	8	crystallin, beta B2 [Source:ZFIN;Acc:ZDB-GENE-060130-1]
ENSDARG00000053570	AL590151.1	lincRNA	14
ENSDARG00000053835	plekhh1	protein_coding	17	pleckstrin homology domain containing, family H (with MyTH4 domain) member 1 [Source:ZFIN;Acc:ZDB-GENE-061219-1]
ENSDARG00000054054	zgc:153219	protein_coding	7	zgc:153219 [Source:ZFIN;Acc:ZDB-GENE-060929-144]
ENSDARG00000054087	irs1	protein_coding	15	insulin receptor substrate 1 [Source:ZFIN;Acc:ZDB-GENE-030131-872]
ENSDARG00000054103	ripply1	protein_coding	21	ripply transcriptional repressor 1 [Source:ZFIN;Acc:ZDB-GENE-060113-1]
ENSDARG00000054253	sobpa	protein_coding	13	sine oculis binding protein homolog (Drosophila) a [Source:ZFIN;Acc:ZDB-GENE-090313-313]
ENSDARG00000054323	pparab	protein_coding	25	peroxisome proliferator-activated receptor alpha b [Source:ZFIN;Acc:ZDB-GENE-990415-211]
ENSDARG00000054373	B3GNT3 (1 of many)	protein_coding	8	si:ch211-126g16.10 [Source:ZFIN;Acc:ZDB-GENE-081104-528]
ENSDARG00000054389	rhof	protein_coding	10	ras homolog family member F [Source:ZFIN;Acc:ZDB-GENE-050522-280]
ENSDARG00000054423	slc7a6	protein_coding	7	solute carrier family 7 (amino acid transporter light chain, y+L system), member 6 [Source:ZFIN;Acc:ZDB-GENE-000607-21]
ENSDARG00000054560	her15.2	protein_coding	11	hairy and enhancer of split-related 15, tandem duplicate 2 [Source:NCBI gene;Acc:678530]
ENSDARG00000054847	xcr1a.1	protein_coding	23	chemokine (C motif) receptor 1a, duplicate 1 [Source:ZFIN;Acc:ZDB-GENE-070302-6]
ENSDARG00000054878	six2b	protein_coding	12	SIX homeobox 2b [Source:ZFIN;Acc:ZDB-GENE-080723-23]
ENSDARG00000055045	casp3b	protein_coding	14	caspase 3, apoptosis-related cysteine peptidase b [Source:ZFIN;Acc:ZDB-GENE-070607-1]
ENSDARG00000055106	znf148	protein_coding	9	zinc finger protein 148 [Source:ZFIN;Acc:ZDB-GENE-030131-8769]
ENSDARG00000055118	mylipb	protein_coding	16	myosin regulatory light chain interacting protein b [Source:ZFIN;Acc:ZDB-GENE-061027-67]
ENSDARG00000055175	c1qtnf6a	protein_coding	3	C1q and TNF related 6a [Source:ZFIN;Acc:ZDB-GENE-080108-3]
ENSDARG00000055283	id2a	protein_coding	17	inhibitor of DNA binding 2a [Source:ZFIN;Acc:ZDB-GENE-020910-1]
ENSDARG00000055395	foxq1b	protein_coding	20	forkhead box Q1b [Source:ZFIN;Acc:ZDB-GENE-040426-2090]
ENSDARG00000055436	ftr97	protein_coding	20	finTRIM family, member 97 [Source:ZFIN;Acc:ZDB-GENE-061026-1]
ENSDARG00000055439	adamtsl7	protein_coding	1	ADAMTS-like 7 [Source:ZFIN;Acc:ZDB-GENE-070816-2]
ENSDARG00000055481	atf7b	protein_coding	6	activating transcription factor 7b [Source:ZFIN;Acc:ZDB-GENE-030131-3028]
ENSDARG00000055534	grk7b	protein_coding	18	G protein-coupled receptor kinase 7b [Source:ZFIN;Acc:ZDB-GENE-030904-3]
ENSDARG00000055552	dvl1b	protein_coding	11	dishevelled segment polarity protein 1b [Source:ZFIN;Acc:ZDB-GENE-071004-1]
ENSDARG00000055561	c1galt1b	protein_coding	6	core 1 synthase, glycoprotein-N-acetylgalactosamine 3-beta-galactosyltransferase, 1b [Source:ZFIN;Acc:ZDB-GENE-030131-9075]
ENSDARG00000055613	zgc:123238	protein_coding	16	zgc:123238 [Source:ZFIN;Acc:ZDB-GENE-051023-3]
ENSDARG00000055632	smtnl	protein_coding	15	smoothelin, like [Source:ZFIN;Acc:ZDB-GENE-040212-1]
ENSDARG00000055731	si:dkeyp-69e1.8	protein_coding	3	si:dkeyp-69e1.8 [Source:ZFIN;Acc:ZDB-GENE-070912-676]
ENSDARG00000055874	cpe	protein_coding	1	carboxypeptidase E [Source:ZFIN;Acc:ZDB-GENE-090313-68]
ENSDARG00000055966	cflara	protein_coding	11	CASP8 and FADD-like apoptosis regulator a [Source:ZFIN;Acc:ZDB-GENE-030826-3]
ENSDARG00000056004	sprn	protein_coding	13	shadow of prion protein [Source:ZFIN;Acc:ZDB-GENE-031110-1]
ENSDARG00000056178	dpt	protein_coding	6	dermatopontin [Source:ZFIN;Acc:ZDB-GENE-060312-9]
ENSDARG00000056262	slc35g2a	protein_coding	2	solute carrier family 35, member G2a [Source:ZFIN;Acc:ZDB-GENE-041114-202]
ENSDARG00000056284	drd7	protein_coding	5	dopamine receptor D7 [Source:ZFIN;Acc:ZDB-GENE-060526-372]
ENSDARG00000056395	onecut3a	protein_coding	22	one cut homeobox 3a [Source:ZFIN;Acc:ZDB-GENE-050208-744]
ENSDARG00000056467	tmub2	protein_coding	3	transmembrane and ubiquitin-like domain containing 2 [Source:ZFIN;Acc:ZDB-GENE-030616-254]
ENSDARG00000056511	arr3a	protein_coding	10	arrestin 3a, retinal (X-arrestin) [Source:ZFIN;Acc:ZDB-GENE-040718-102]
ENSDARG00000056530	cpamd8	protein_coding	22	C3 and PZP-like, alpha-2-macroglobulin domain containing 8 [Source:ZFIN;Acc:ZDB-GENE-050208-428]
ENSDARG00000056531	nutf2	protein_coding	18	nuclear transport factor 2 [Source:ZFIN;Acc:ZDB-GENE-041010-77]
ENSDARG00000056619	arhgap42a	protein_coding	21	Rho GTPase activating protein 42a [Source:ZFIN;Acc:ZDB-GENE-030131-8077]
ENSDARG00000056625	trpc6a	protein_coding	21	transient receptor potential cation channel, subfamily C, member 6a [Source:ZFIN;Acc:ZDB-GENE-040724-114]
ENSDARG00000056722	cd99l2	protein_coding	7	CD99 molecule-like 2 [Source:ZFIN;Acc:ZDB-GENE-030131-1986]
ENSDARG00000056745	necab2	protein_coding	18	N-terminal EF-hand calcium binding protein 2 [Source:ZFIN;Acc:ZDB-GENE-050706-167]
ENSDARG00000056892	mpp6a	protein_coding	16	membrane protein, palmitoylated 6a (MAGUK p55 subfamily member 6) [Source:ZFIN;Acc:ZDB-GENE-050506-35]
ENSDARG00000057013	cadm3	protein_coding	2	cell adhesion molecule 3 [Source:ZFIN;Acc:ZDB-GENE-060512-196]
ENSDARG00000057017	slc6a4b	protein_coding	5	solute carrier family 6 (neurotransmitter transporter), member 4b [Source:ZFIN;Acc:ZDB-GENE-060314-2]
ENSDARG00000057032	ppm1nb	protein_coding	21	protein phosphatase, Mg2+/Mn2+ dependent, 1Nb (putative) [Source:ZFIN;Acc:ZDB-GENE-071004-34]
ENSDARG00000057054	lrit3b	protein_coding	13	leucine-rich repeat, immunoglobulin-like and transmembrane domains 3b [Source:ZFIN;Acc:ZDB-GENE-070424-130]
ENSDARG00000057055	ndufs8b	polymorphic_pseudogene	14	NADH dehydrogenase (ubiquinone) Fe-S protein 8b [Source:ZFIN;Acc:ZDB-GENE-050522-131]
ENSDARG00000057263	zgc:173729	protein_coding	16	zgc:173729 [Source:ZFIN;Acc:ZDB-GENE-071004-64]
ENSDARG00000057273	alox5a	protein_coding	13	arachidonate 5-lipoxygenase a [Source:ZFIN;Acc:ZDB-GENE-090311-47]
ENSDARG00000057352	slc25a29	protein_coding	20	solute carrier family 25 (mitochondrial carnitine/acylcarnitine carrier), member 29 [Source:ZFIN;Acc:ZDB-GENE-050913-70]
ENSDARG00000057353	ehbp1l1a	protein_coding	7	EH domain binding protein 1-like 1a [Source:ZFIN;Acc:ZDB-GENE-080917-27]
ENSDARG00000057435	amacr	protein_coding	21	alpha-methylacyl-CoA racemase [Source:ZFIN;Acc:ZDB-GENE-050522-484]
ENSDARG00000057536	crygm2a	protein_coding	9	crystallin, gamma M2a [Source:ZFIN;Acc:ZDB-GENE-050516-9]
ENSDARG00000057590	si:ch1073-396h14.1	protein_coding	22	si:ch1073-396h14.1 [Source:ZFIN;Acc:ZDB-GENE-070705-6]
ENSDARG00000057633	cxcr4a	protein_coding	6	chemokine (C-X-C motif) receptor 4a [Source:ZFIN;Acc:ZDB-GENE-020102-1]
ENSDARG00000057688	ical1	protein_coding	6	islet cell autoantigen 1-like [Source:ZFIN;Acc:ZDB-GENE-030910-4]
ENSDARG00000057789	lyz	protein_coding	24	lysozyme [Source:ZFIN;Acc:ZDB-GENE-020515-2]
ENSDARG00000057942	glt8d2	protein_coding	4	glycosyltransferase 8 domain containing 2 [Source:ZFIN;Acc:ZDB-GENE-041210-98]
ENSDARG00000058003	wfdc1	protein_coding	18	WAP four-disulfide core domain 1 [Source:ZFIN;Acc:ZDB-GENE-070112-352]
ENSDARG00000058103	glra4b	protein_coding	5	glycine receptor, alpha 4b [Source:ZFIN;Acc:ZDB-GENE-020402-2]
ENSDARG00000058127	hcfc2	protein_coding	4	host cell factor C2 [Source:ZFIN;Acc:ZDB-GENE-050417-203]
ENSDARG00000058147	dnajc5b	protein_coding	24	DnaJ (Hsp40) homolog, subfamily C, member 5 beta [Source:ZFIN;Acc:ZDB-GENE-050413-1]
ENSDARG00000058178	zdhhc20b	protein_coding	24	zinc finger, DHHC-type containing 20b [Source:ZFIN;Acc:ZDB-GENE-091117-30]
ENSDARG00000058237	ssbp3a	protein_coding	2	single stranded DNA binding protein 3a [Source:ZFIN;Acc:ZDB-GENE-070705-484]
ENSDARG00000058473	st6galnac3	protein_coding	2	ST6 (alpha-N-acetyl-neuraminyl-2,3-beta-galactosyl-1,3)-N-acetylgalactosaminide alpha-2,6-sialyltransferase 3 [Source:ZFIN;Acc:ZDB-GENE-030131-1329]
ENSDARG00000058475	ern2	protein_coding	1	endoplasmic reticulum to nucleus signaling 2 [Source:ZFIN;Acc:ZDB-GENE-090312-15]
ENSDARG00000058479	zgc:110425	protein_coding	7	zgc:110425 [Source:ZFIN;Acc:ZDB-GENE-050522-103]
ENSDARG00000058546	si:dkey-30c15.12	protein_coding	18	si:dkey-30c15.12 [Source:ZFIN;Acc:ZDB-GENE-060503-920]
ENSDARG00000058551	popdc3	protein_coding	16	popeye domain containing 3 [Source:ZFIN;Acc:ZDB-GENE-040624-10]
ENSDARG00000058646	ptprna	protein_coding	9	protein tyrosine phosphatase, receptor type, Na [Source:ZFIN;Acc:ZDB-GENE-030131-3511]
ENSDARG00000058673	nkl.1	protein_coding	17	NK-lysin tandem duplicate 1 [Source:ZFIN;Acc:ZDB-GENE-131121-525]
ENSDARG00000058692	fzd3b	protein_coding	17	frizzled class receptor 3b [Source:ZFIN;Acc:ZDB-GENE-070122-1]
ENSDARG00000058828	ccdc51	protein_coding	22	coiled-coil domain containing 51 [Source:ZFIN;Acc:ZDB-GENE-060825-200]
ENSDARG00000058969	cntnap2a	protein_coding	24	contactin associated protein like 2a [Source:ZFIN;Acc:ZDB-GENE-120328-3]
ENSDARG00000058990	slc35a2	protein_coding	8	solute carrier family 35 (UDP-galactose transporter), member 2 [Source:ZFIN;Acc:ZDB-GENE-030616-62]
ENSDARG00000058992	cers2b	protein_coding	16	ceramide synthase 2b [Source:ZFIN;Acc:ZDB-GENE-110408-40]
ENSDARG00000059166	slc22a13b	protein_coding	24	solute carrier family 22 member 13b [Source:ZFIN;Acc:ZDB-GENE-061013-532]
ENSDARG00000059233	runx2b	protein_coding	20	runt-related transcription factor 2b [Source:ZFIN;Acc:ZDB-GENE-040629-4]
ENSDARG00000059363	tgfbr2a	protein_coding	19	transforming growth factor beta receptor 2a [Source:ZFIN;Acc:ZDB-GENE-120404-1]
ENSDARG00000059432	fsd1l	protein_coding	5	fibronectin type III and SPRY domain containing 1-like [Source:ZFIN;Acc:ZDB-GENE-070501-9]
ENSDARG00000059475	camsap3	protein_coding	3	calmodulin regulated spectrin-associated protein family, member 3 [Source:ZFIN;Acc:ZDB-GENE-060503-811]
ENSDARG00000059557	xylt2	protein_coding	3	xylosyltransferase II [Source:ZFIN;Acc:ZDB-GENE-081022-125]
ENSDARG00000059693	adam19a	protein_coding	7	ADAM metallopeptidase domain 19a [Source:ZFIN;Acc:ZDB-GENE-070813-1]
ENSDARG00000059722	ubac1	protein_coding	5	UBA domain containing 1 [Source:ZFIN;Acc:ZDB-GENE-030131-9372]
ENSDARG00000059760	wdtc1	protein_coding	16	WD and tetratricopeptide repeats 1 [Source:ZFIN;Acc:ZDB-GENE-030131-3224]
ENSDARG00000059774	dub	protein_coding	21	duboraya [Source:ZFIN;Acc:ZDB-GENE-060825-81]
ENSDARG00000059818	kif5ab	protein_coding	6	kinesin family member 5A, b [Source:ZFIN;Acc:ZDB-GENE-110510-3]
ENSDARG00000059846	epg5	protein_coding	5	ectopic P-granules autophagy protein 5 homolog (C. elegans) [Source:ZFIN;Acc:ZDB-GENE-070705-307]
ENSDARG00000059993	trpm4a	protein_coding	3	transient receptor potential cation channel, subfamily M, member 4a [Source:ZFIN;Acc:ZDB-GENE-090302-3]
ENSDARG00000060008	hhipl2	protein_coding	17	HHIP-like 2 [Source:ZFIN;Acc:ZDB-GENE-131120-145]
ENSDARG00000060018	si:ch1073-44g3.1	protein_coding	14	si:ch1073-44g3.1 [Source:ZFIN;Acc:ZDB-GENE-141216-124]
ENSDARG00000060081	crb2b	protein_coding	8	crumbs family member 2b [Source:ZFIN;Acc:ZDB-GENE-060610-1]
ENSDARG00000060096	tbc1d10ab	protein_coding	10	TBC1 domain family, member 10Ab [Source:ZFIN;Acc:ZDB-GENE-081105-145]
ENSDARG00000060103	cpeb3	protein_coding	13	cytoplasmic polyadenylation element binding protein 3 [Source:ZFIN;Acc:ZDB-GENE-090312-68]
ENSDARG00000060168	fam160b1	protein_coding	13	family with sequence similarity 160, member B1 [Source:ZFIN;Acc:ZDB-GENE-070424-63]
ENSDARG00000060184	pkn1a	protein_coding	1	protein kinase N1a [Source:ZFIN;Acc:ZDB-GENE-061207-17]
ENSDARG00000060211	ankef1b	protein_coding	17	ankyrin repeat and EF-hand domain containing 1b [Source:ZFIN;Acc:ZDB-GENE-060810-68]
ENSDARG00000060319	scn4bb	protein_coding	5	sodium channel, voltage-gated, type IV, beta b [Source:ZFIN;Acc:ZDB-GENE-031116-71]
ENSDARG00000060368	syn1	protein_coding	8	synapsin I [Source:ZFIN;Acc:ZDB-GENE-081105-93]
ENSDARG00000060534	sgpp1	protein_coding	13	sphingosine-1-phosphate phosphatase 1 [Source:ZFIN;Acc:ZDB-GENE-090319-2]
ENSDARG00000060596	prkaa1	protein_coding	5	protein kinase, AMP-activated, alpha 1 catalytic subunit [Source:ZFIN;Acc:ZDB-GENE-030325-1]
ENSDARG00000060734	appl1	protein_coding	11	adaptor protein, phosphotyrosine interaction, PH domain and leucine zipper containing 1 [Source:ZFIN;Acc:ZDB-GENE-081016-1]
ENSDARG00000060847	setd1ba	protein_coding	10	SET domain containing 1B, a [Source:ZFIN;Acc:ZDB-GENE-050309-289]
ENSDARG00000060901	trim62	protein_coding	11	tripartite motif containing 62 [Source:ZFIN;Acc:ZDB-GENE-070112-502]
ENSDARG00000060925	jarid2a	protein_coding	16	jumonji, AT rich interactive domain 2a [Source:ZFIN;Acc:ZDB-GENE-061218-1]
ENSDARG00000060926	rnf19b	protein_coding	19	ring finger protein 19B [Source:ZFIN;Acc:ZDB-GENE-060503-281]
ENSDARG00000060944	rnf217	protein_coding	20	ring finger protein 217 [Source:ZFIN;Acc:ZDB-GENE-060503-400]
ENSDARG00000061021	fam160a1a	protein_coding	1	family with sequence similarity 160, member A1a [Source:ZFIN;Acc:ZDB-GENE-090312-132]
ENSDARG00000061096	dapk2a	protein_coding	7	death-associated protein kinase 2a [Source:ZFIN;Acc:ZDB-GENE-080402-8]
ENSDARG00000061099	nfasca	protein_coding	11	neurofascin homolog (chicken) a [Source:ZFIN;Acc:ZDB-GENE-080229-6]
ENSDARG00000061110	zbtb44	protein_coding	5	zinc finger and BTB domain containing 44 [Source:ZFIN;Acc:ZDB-GENE-060526-201]
ENSDARG00000061121	adgrl3.1	protein_coding	1	adhesion G protein-coupled receptor L3.1 [Source:ZFIN;Acc:ZDB-GENE-030131-7856]
ENSDARG00000061140	colec12	protein_coding	2	collectin sub-family member 12 [Source:ZFIN;Acc:ZDB-GENE-030131-9807]
ENSDARG00000061191	plekho1a	protein_coding	19	pleckstrin homology domain containing, family O member 1a [Source:ZFIN;Acc:ZDB-GENE-060503-433]
ENSDARG00000061194	hectd2	protein_coding	12	HECT domain containing 2 [Source:ZFIN;Acc:ZDB-GENE-100405-3]
ENSDARG00000061257	zgc:153240	protein_coding	3	zgc:153240 [Source:ZFIN;Acc:ZDB-GENE-060825-218]
ENSDARG00000061354	foxred2	protein_coding	3	FAD-dependent oxidoreductase domain containing 2 [Source:ZFIN;Acc:ZDB-GENE-060929-1026]
ENSDARG00000061400	csgalnact2	protein_coding	13	chondroitin sulfate N-acetylgalactosaminyltransferase 2 [Source:ZFIN;Acc:ZDB-GENE-030131-5186]
ENSDARG00000061471	sema5ba	protein_coding	9	sema domain, seven thrombospondin repeats (type 1 and type 1-like), transmembrane domain (TM) and short cytoplasmic domain, (semaphorin) 5Ba [Source:ZFIN;Acc:ZDB-GENE-070912-187]
ENSDARG00000061549	foxo1b	protein_coding	10	forkhead box O1 b [Source:ZFIN;Acc:ZDB-GENE-080425-3]
ENSDARG00000061560	stim1b	protein_coding	21	stromal interaction molecule 1b [Source:ZFIN;Acc:ZDB-GENE-060531-4]
ENSDARG00000061576	gldn	protein_coding	18	gliomedin [Source:ZFIN;Acc:ZDB-GENE-050119-4]
ENSDARG00000061687	atxn1a	protein_coding	19	ataxin 1a [Source:ZFIN;Acc:ZDB-GENE-060503-759]
ENSDARG00000061710	map3k8	protein_coding	12	mitogen-activated protein kinase kinase kinase 8 [Source:ZFIN;Acc:ZDB-GENE-100316-8]
ENSDARG00000061941	trpv4	protein_coding	5	transient receptor potential cation channel, subfamily V, member 4 [Source:ZFIN;Acc:ZDB-GENE-030912-7]
ENSDARG00000061960	ube3b	protein_coding	5	ubiquitin protein ligase E3B [Source:ZFIN;Acc:ZDB-GENE-060526-231]
ENSDARG00000062017	fsd1	protein_coding	8	fibronectin type III and SPRY domain containing 1 [Source:ZFIN;Acc:ZDB-GENE-060503-218]
ENSDARG00000062108	iffo1b	protein_coding	16	intermediate filament family orphan 1b [Source:ZFIN;Acc:ZDB-GENE-050208-308]
ENSDARG00000062122	klhl5	protein_coding	1	kelch-like family member 5 [Source:ZFIN;Acc:ZDB-GENE-080424-7]
ENSDARG00000062173	camsap2a	protein_coding	22	calmodulin regulated spectrin-associated protein family, member 2a [Source:ZFIN;Acc:ZDB-GENE-030131-3016]
ENSDARG00000062181	bmt2	protein_coding	25	base methyltransferase of 25S rRNA 2 homolog [Source:ZFIN;Acc:ZDB-GENE-060825-17]
ENSDARG00000062206	skiv2l	protein_coding	19	SKI2 homolog, superkiller viralicidic activity 2-like [Source:ZFIN;Acc:ZDB-GENE-010430-5]
ENSDARG00000062268	jarid2b	protein_coding	19	jumonji, AT rich interactive domain 2b [Source:ZFIN;Acc:ZDB-GENE-060503-246]
ENSDARG00000062349	arhgap15	protein_coding	9	Rho GTPase activating protein 15 [Source:ZFIN;Acc:ZDB-GENE-070912-314]
ENSDARG00000062350	synm	protein_coding	18	synemin, intermediate filament protein [Source:ZFIN;Acc:ZDB-GENE-050419-81]
ENSDARG00000062355	axdnd1	protein_coding	22	axonemal dynein light chain domain containing 1 [Source:ZFIN;Acc:ZDB-GENE-050208-341]
ENSDARG00000062381	si:ch211-238n5.4	protein_coding	18	si:ch211-238n5.4 [Source:ZFIN;Acc:ZDB-GENE-050419-80]
ENSDARG00000062465	pgap1	protein_coding	9	post-GPI attachment to proteins 1 [Source:ZFIN;Acc:ZDB-GENE-090313-216]
ENSDARG00000062579	kremen1	protein_coding	5	kringle containing transmembrane protein 1 [Source:ZFIN;Acc:ZDB-GENE-070705-262]
ENSDARG00000062661	abca4b	protein_coding	2	ATP-binding cassette, sub-family A (ABC1), member 4b [Source:ZFIN;Acc:ZDB-GENE-050517-4]
ENSDARG00000062672	kcnj19b	protein_coding	12	potassium voltage-gated channel, subfamily J, member 19b [Source:ZFIN;Acc:ZDB-GENE-121214-60]
ENSDARG00000062823	pi4kab	protein_coding	8	phosphatidylinositol 4-kinase, catalytic, alpha b [Source:ZFIN;Acc:ZDB-GENE-080220-34]
ENSDARG00000062865	mras	protein_coding	22	muscle RAS oncogene homolog [Source:ZFIN;Acc:ZDB-GENE-050208-495]
ENSDARG00000062904	idua	protein_coding	5	iduronidase, alpha-L- [Source:ZFIN;Acc:ZDB-GENE-060526-29]
ENSDARG00000062933	cmip	protein_coding	18	c-Maf inducing protein [Source:ZFIN;Acc:ZDB-GENE-050419-50]
ENSDARG00000062956	dagla	protein_coding	7	diacylglycerol lipase, alpha [Source:ZFIN;Acc:ZDB-GENE-070619-1]
ENSDARG00000062976	iffo1a	protein_coding	19	intermediate filament family orphan 1a [Source:ZFIN;Acc:ZDB-GENE-060503-418]
ENSDARG00000063011	antxr2b	protein_coding	10	anthrax toxin receptor 2b [Source:ZFIN;Acc:ZDB-GENE-080213-4]
ENSDARG00000063075	soga1	protein_coding	23	suppressor of glucose, autophagy associated 1 [Source:ZFIN;Acc:ZDB-GENE-090313-188]
ENSDARG00000063242	ttc13	protein_coding	20	tetratricopeptide repeat domain 13 [Source:ZFIN;Acc:ZDB-GENE-080722-25]
ENSDARG00000063252	prcc	protein_coding	19	papillary renal cell carcinoma (translocation-associated) [Source:ZFIN;Acc:ZDB-GENE-070717-1]
ENSDARG00000063288	slc2a11b	protein_coding	5	solute carrier family 2 (facilitated glucose transporter), member 11b [Source:ZFIN;Acc:ZDB-GENE-070705-96]
ENSDARG00000063361	si:ch211-1e14.1	protein_coding	18	si:ch211-1e14.1 [Source:ZFIN;Acc:ZDB-GENE-050420-149]
ENSDARG00000063475	abcg1	protein_coding	15	ATP-binding cassette, sub-family G (WHITE), member 1 [Source:ZFIN;Acc:ZDB-GENE-070424-84]
ENSDARG00000063578	CABZ01020835.1	protein_coding	4
ENSDARG00000063635	nrxn1b	protein_coding	13	neurexin 1b [Source:ZFIN;Acc:ZDB-GENE-070206-3]
ENSDARG00000063684	ppm1h	protein_coding	25	protein phosphatase, Mg2+/Mn2+ dependent, 1H [Source:ZFIN;Acc:ZDB-GENE-061027-190]
ENSDARG00000067605	napaa	protein_coding	5	N-ethylmaleimide-sensitive factor attachment protein, alpha a [Source:ZFIN;Acc:ZDB-GENE-060531-160]
ENSDARG00000067626	ywhag1	protein_coding	5	3-monooxygenase/tryptophan 5-monooxygenase activation protein, gamma polypeptide 1 [Source:ZFIN;Acc:ZDB-GENE-011115-1]
ENSDARG00000067672	card9	protein_coding	5	caspase recruitment domain family, member 9 [Source:ZFIN;Acc:ZDB-GENE-060531-94]
ENSDARG00000067719	wwtr1	protein_coding	22	WW domain containing transcription regulator 1 [Source:ZFIN;Acc:ZDB-GENE-051101-1]
ENSDARG00000067729	arid3c	protein_coding	5	AT rich interactive domain 3C (BRIGHT-like) [Source:ZFIN;Acc:ZDB-GENE-060526-12]
ENSDARG00000068365	lmx1bb	protein_coding	8	LIM homeobox transcription factor 1, beta b [Source:ZFIN;Acc:ZDB-GENE-050114-2]
ENSDARG00000068374	si:ch211-132b12.7	protein_coding	18	si:ch211-132b12.7 [Source:ZFIN;Acc:ZDB-GENE-050419-250]
ENSDARG00000068409	vgll4l	protein_coding	8	vestigial like 4 like [Source:ZFIN;Acc:ZDB-GENE-070112-1682]
ENSDARG00000068460	otog	protein_coding	7	otogelin [Source:ZFIN;Acc:ZDB-GENE-120228-1]
ENSDARG00000068507	crybb1	protein_coding	10	crystallin, beta B1 [Source:ZFIN;Acc:ZDB-GENE-010813-1]
ENSDARG00000068551	elovl8a	protein_coding	2	ELOVL fatty acid elongase 8a [Source:ZFIN;Acc:ZDB-GENE-060929-240]
ENSDARG00000068657	irgq2	protein_coding	15	immunity-related GTPase family, q2 [Source:ZFIN;Acc:ZDB-GENE-051212-7]
ENSDARG00000068726	masp1	protein_coding	15	mannan-binding lectin serine peptidase 1 [Source:ZFIN;Acc:ZDB-GENE-110421-4]
ENSDARG00000068742	CR384085.1	protein_coding	5
ENSDARG00000068745	map4l	protein_coding	2	microtubule associated protein 4 like [Source:ZFIN;Acc:ZDB-GENE-070912-581]
ENSDARG00000068849	fam83ha	protein_coding	13	family with sequence similarity 83, member Ha [Source:ZFIN;Acc:ZDB-GENE-090312-104]
ENSDARG00000068886	mrpl14	protein_coding	13	mitochondrial ribosomal protein L14 [Source:ZFIN;Acc:ZDB-GENE-040426-1066]
ENSDARG00000069003	pcyox1l	protein_coding	21	prenylcysteine oxidase 1 like [Source:ZFIN;Acc:ZDB-GENE-141212-302]
ENSDARG00000069093	col2a1a	protein_coding	8	collagen, type II, alpha 1a [Source:ZFIN;Acc:ZDB-GENE-980526-192]
ENSDARG00000069113	dbn1	protein_coding	21	drebrin 1 [Source:ZFIN;Acc:ZDB-GENE-091204-284]
ENSDARG00000069208	stx7l	protein_coding	20	syntaxin 7-like [Source:ZFIN;Acc:ZDB-GENE-041014-35]
ENSDARG00000069211	taar14i	protein_coding	20	trace amine associated receptor 14i [Source:ZFIN;Acc:ZDB-GENE-060414-25]
ENSDARG00000069327	nkx3.3	protein_coding	13	NK3 homeobox 3 [Source:ZFIN;Acc:ZDB-GENE-050306-27]
ENSDARG00000069333	FP102052.1	protein_coding	10
ENSDARG00000069339	tbc1d24	protein_coding	24	TBC1 domain family, member 24 [Source:ZFIN;Acc:ZDB-GENE-050809-65]
ENSDARG00000069431	slc26a4	protein_coding	4	solute carrier family 26 (anion exchanger), member 4 [Source:ZFIN;Acc:ZDB-GENE-060503-544]
ENSDARG00000069481	ghrh	protein_coding	11	growth hormone releasing hormone [Source:ZFIN;Acc:ZDB-GENE-070426-1]
ENSDARG00000069501	abhd11	protein_coding	21	abhydrolase domain containing 11 [Source:ZFIN;Acc:ZDB-GENE-040909-1]
ENSDARG00000069590	tmem150c	protein_coding	10	transmembrane protein 150C [Source:ZFIN;Acc:ZDB-GENE-090112-5]
ENSDARG00000069698	lrguk	protein_coding	4	leucine-rich repeats and guanylate kinase domain containing [Source:ZFIN;Acc:ZDB-GENE-050419-232]
ENSDARG00000069795	zgc:154058	protein_coding	13	zgc:154058 [Source:ZFIN;Acc:ZDB-GENE-060929-48]
ENSDARG00000069866	sox1a	protein_coding	9	SRY (sex determining region Y)-box 1a [Source:ZFIN;Acc:ZDB-GENE-040718-186]
ENSDARG00000069988	arid6	protein_coding	21	AT-rich interaction domain 6 [Source:ZFIN;Acc:ZDB-GENE-070112-1882]
ENSDARG00000070132	aste1a	protein_coding	16	asteroid homolog 1a [Source:ZFIN;Acc:ZDB-GENE-060503-520]
ENSDARG00000070141	si:ch211-191i18.2	protein_coding	19	si:ch211-191i18.2 [Source:ZFIN;Acc:ZDB-GENE-060503-769]
ENSDARG00000070165	tnfrsf1b	protein_coding	11	tumor necrosis factor receptor superfamily, member 1B [Source:ZFIN;Acc:ZDB-GENE-070410-133]
ENSDARG00000070174	si:ch211-18i17.2	protein_coding	3	si:ch211-18i17.2 [Source:ZFIN;Acc:ZDB-GENE-030131-5404]
ENSDARG00000070213	etnk2	protein_coding	11	ethanolamine kinase 2 [Source:ZFIN;Acc:ZDB-GENE-050913-135]
ENSDARG00000070272	casp8l2	protein_coding	9	caspase 8, apoptosis-related cysteine peptidase, like 2 [Source:ZFIN;Acc:ZDB-GENE-070608-2]
ENSDARG00000070360	fam212aa	protein_coding	11	family with sequence similarity 212, member Aa [Source:ZFIN;Acc:ZDB-GENE-060512-186]
ENSDARG00000070408	ccnd2b	protein_coding	4	cyclin D2, b [Source:ZFIN;Acc:ZDB-GENE-050420-354]
ENSDARG00000070452	saraf	protein_coding	1	store-operated calcium entry-associated regulatory factor [Source:ZFIN;Acc:ZDB-GENE-060929-208]
ENSDARG00000070497	bicc1b	protein_coding	12	BicC family RNA binding protein 1b [Source:ZFIN;Acc:ZDB-GENE-080522-3]
ENSDARG00000070498	phyhiplb	protein_coding	12	phytanoyl-CoA 2-hydroxylase interacting protein-like b [Source:ZFIN;Acc:ZDB-GENE-040927-27]
ENSDARG00000070536	creb5b	protein_coding	16	cAMP responsive element binding protein 5b [Source:ZFIN;Acc:ZDB-GENE-091020-6]
ENSDARG00000070598	eno4	protein_coding	17	enolase family member 4 [Source:ZFIN;Acc:ZDB-GENE-061013-677]
ENSDARG00000070666	rhol	protein_coding	11	rhodopsin, like [Source:ZFIN;Acc:ZDB-GENE-070424-6]
ENSDARG00000070669	cxcr3.3	protein_coding	16	chemokine (C-X-C motif) receptor 3, tandem duplicate 3 [Source:ZFIN;Acc:ZDB-GENE-100922-34]
ENSDARG00000070705	zgc:64022	protein_coding	19	zgc:64022 [Source:ZFIN;Acc:ZDB-GENE-040426-1340]
ENSDARG00000070724	chrna4b	protein_coding	11	cholinergic receptor, nicotinic, alpha 4b [Source:ZFIN;Acc:ZDB-GENE-090505-3]
ENSDARG00000070755	ccr11.1	protein_coding	16	chemokine (C-C motif) receptor 11.1 [Source:ZFIN;Acc:ZDB-GENE-070302-5]
ENSDARG00000070770	her4.3	protein_coding	23	hairy-related 4, tandem duplicate 3 [Source:ZFIN;Acc:ZDB-GENE-081030-7]
ENSDARG00000070846	dazap1	protein_coding	11	DAZ associated protein 1 [Source:ZFIN;Acc:ZDB-GENE-070212-1]
ENSDARG00000070995	inpp4ab	protein_coding	6	inositol polyphosphate-4-phosphatase type I Ab [Source:ZFIN;Acc:ZDB-GENE-081104-521]
ENSDARG00000071026	mllt11	protein_coding	19	MLLT11, transcription factor 7 cofactor [Source:ZFIN;Acc:ZDB-GENE-030131-3007]
ENSDARG00000071029	si:dkey-147f3.4	protein_coding	23	si:dkey-147f3.4 [Source:ZFIN;Acc:ZDB-GENE-061009-29]
ENSDARG00000071107	wnt7bb	protein_coding	25	wingless-type MMTV integration site family, member 7Bb [Source:ZFIN;Acc:ZDB-GENE-081006-1]
ENSDARG00000071139	zgc:64065	protein_coding	6	zgc:64065 [Source:ZFIN;Acc:ZDB-GENE-040426-1355]
ENSDARG00000071152	pick1	protein_coding	3	protein interacting with prkca 1 [Source:ZFIN;Acc:ZDB-GENE-061013-283]
ENSDARG00000071173	slc12a10.2	protein_coding	7	solute carrier family 12 (sodium/potassium/chloride transporters), member 10, tandem duplicate 2 [Source:ZFIN;Acc:ZDB-GENE-060503-425]
ENSDARG00000071374	lrrtm2	protein_coding	24	leucine rich repeat transmembrane neuronal 2 [Source:ZFIN;Acc:ZDB-GENE-080327-8]
ENSDARG00000071389	si:dkey-78l4.6	protein_coding	22	si:dkey-78l4.6 [Source:ZFIN;Acc:ZDB-GENE-060503-83]
ENSDARG00000071585	si:dkeyp-110e4.11	protein_coding	14	si:dkeyp-110e4.11 [Source:ZFIN;Acc:ZDB-GENE-070424-267]
ENSDARG00000071656	si:dkey-19a16.5	protein_coding	22	si:dkey-19a16.5 [Source:ZFIN;Acc:ZDB-GENE-050208-733]
ENSDARG00000073688	nav2a	protein_coding	7	neuron navigator 2a [Source:ZFIN;Acc:ZDB-GENE-120502-3]
ENSDARG00000073711	mmrn2b	protein_coding	12	multimerin 2b [Source:ZFIN;Acc:ZDB-GENE-080415-2]
ENSDARG00000073713	vav3b	protein_coding	2	vav 3 guanine nucleotide exchange factor b [Source:ZFIN;Acc:ZDB-GENE-070912-251]
ENSDARG00000073771	tbc1d12b	protein_coding	12	TBC1 domain family, member 12b [Source:ZFIN;Acc:ZDB-GENE-121214-108]
ENSDARG00000073802	cntnap5l	protein_coding	11	contactin associated protein-like 5 like [Source:ZFIN;Acc:ZDB-GENE-140106-102]
ENSDARG00000073848	arhgef7b	protein_coding	1	Rho guanine nucleotide exchange factor (GEF) 7b [Source:ZFIN;Acc:ZDB-GENE-041212-49]
ENSDARG00000073857	klf7a	protein_coding	1	Kruppel-like factor 7a [Source:ZFIN;Acc:ZDB-GENE-050522-276]
ENSDARG00000073944	si:ch73-386h18.1	protein_coding	18	si:ch73-386h18.1 [Source:ZFIN;Acc:ZDB-GENE-050309-237]
ENSDARG00000073999	tapt1a	protein_coding	14	transmembrane anterior posterior transformation 1a [Source:ZFIN;Acc:ZDB-GENE-131017-2]
ENSDARG00000074017	usp31	protein_coding	3	ubiquitin specific peptidase 31 [Source:ZFIN;Acc:ZDB-GENE-100210-4]
ENSDARG00000074132	scpp7	protein_coding	1	secretory calcium-binding phosphoprotein 7 [Source:ZFIN;Acc:ZDB-GENE-090313-257]
ENSDARG00000074143	myo10l3	protein_coding	9	myosin X-like 3 [Source:ZFIN;Acc:ZDB-GENE-070912-237]
ENSDARG00000074183	si:dkey-172j4.3	protein_coding	7	si:dkey-172j4.3 [Source:ZFIN;Acc:ZDB-GENE-081104-24]
ENSDARG00000074286	hint3	protein_coding	16	histidine triad nucleotide binding protein 3 [Source:ZFIN;Acc:ZDB-GENE-100922-168]
ENSDARG00000074316	itga1	protein_coding	10	integrin, alpha 1 [Source:ZFIN;Acc:ZDB-GENE-091118-115]
ENSDARG00000074329	arvcfa	protein_coding	10	ARVCF, delta catenin family member a [Source:ZFIN;Acc:ZDB-GENE-091113-43]
ENSDARG00000074590	wdpcp	protein_coding	17	WD repeat containing planar cell polarity effector [Source:ZFIN;Acc:ZDB-GENE-100405-4]
ENSDARG00000074633	gpr35.1	protein_coding	22	G protein-coupled receptor 35, tandem duplicate 1 [Source:ZFIN;Acc:ZDB-GENE-080204-17]
ENSDARG00000074660	rilp	protein_coding	15	Rab interacting lysosomal protein [Source:ZFIN;Acc:ZDB-GENE-100408-4]
ENSDARG00000074661	gper1	protein_coding	3	G protein-coupled estrogen receptor 1 [Source:ZFIN;Acc:ZDB-GENE-090311-1]
ENSDARG00000074723	myo10l1	protein_coding	6	myosin X-like 1 [Source:ZFIN;Acc:ZDB-GENE-080425-1]
ENSDARG00000074777	ank1b	protein_coding	21	ankyrin 1, erythrocytic b [Source:ZFIN;Acc:ZDB-GENE-091113-6]
ENSDARG00000074808	megf6b	protein_coding	11	multiple EGF-like-domains 6b [Source:ZFIN;Acc:ZDB-GENE-101112-3]
ENSDARG00000074955	nup98	protein_coding	21	nucleoporin 98 [Source:ZFIN;Acc:ZDB-GENE-040426-1180]
ENSDARG00000074968	polr2m	protein_coding	7	RNA polymerase II subunit M [Source:ZFIN;Acc:ZDB-GENE-160728-95]
ENSDARG00000074989	sparcl1	protein_coding	1	SPARC-like 1 [Source:ZFIN;Acc:ZDB-GENE-060130-6]
ENSDARG00000075017	myzap	protein_coding	7	myocardial zonula adherens protein [Source:ZFIN;Acc:ZDB-GENE-041111-91]
ENSDARG00000075045	cxcl18b	protein_coding	1	chemokine (C-X-C motif) ligand 18b [Source:ZFIN;Acc:ZDB-GENE-090313-165]
ENSDARG00000075183	rnf220b	protein_coding	8	ring finger protein 220b [Source:ZFIN;Acc:ZDB-GENE-081104-195]
ENSDARG00000075229	slc46a2	protein_coding	10	solute carrier family 46 member 2 [Source:ZFIN;Acc:ZDB-GENE-170126-3]
ENSDARG00000075252	phrf1	protein_coding	25	PHD and ring finger domains 1 [Source:ZFIN;Acc:ZDB-GENE-030131-624]
ENSDARG00000075271	rapgef5a	protein_coding	19	Rap guanine nucleotide exchange factor (GEF) 5a [Source:ZFIN;Acc:ZDB-GENE-030131-7681]
ENSDARG00000075307	kcnq2a	protein_coding	8	potassium voltage-gated channel, KQT-like subfamily, member 2a [Source:ZFIN;Acc:ZDB-GENE-080220-37]
ENSDARG00000075405	adck5	protein_coding	19	aarF domain containing kinase 5 [Source:ZFIN;Acc:ZDB-GENE-081104-149]
ENSDARG00000075433	myom2a	protein_coding	11	myomesin 2a [Source:ZFIN;Acc:ZDB-GENE-030131-6201]
ENSDARG00000075515	zgc:171713	protein_coding	12	zgc:171713 [Source:ZFIN;Acc:ZDB-GENE-070820-17]
ENSDARG00000075525	cln8	protein_coding	17	CLN8, transmembrane ER and ERGIC protein [Source:ZFIN;Acc:ZDB-GENE-060906-3]
ENSDARG00000075533	zbtb24	protein_coding	17	zinc finger and BTB domain containing 24 [Source:ZFIN;Acc:ZDB-GENE-081022-123]
ENSDARG00000075571	bicd2	protein_coding	11	bicaudal D homolog 2 (Drosophila) [Source:ZFIN;Acc:ZDB-GENE-120717-1]
ENSDARG00000075624	bend5	protein_coding	8	BEN domain containing 5 [Source:ZFIN;Acc:ZDB-GENE-081104-460]
ENSDARG00000075698	nkpd1	protein_coding	11	NTPase, KAP family P-loop domain containing 1 [Source:ZFIN;Acc:ZDB-GENE-141215-19]
ENSDARG00000075706	si:ch211-106h4.9	protein_coding	2	si:ch211-106h4.9 [Source:ZFIN;Acc:ZDB-GENE-070705-17]
ENSDARG00000075821	plxnb1a	protein_coding	23	plexin b1a [Source:ZFIN;Acc:ZDB-GENE-050302-63]
ENSDARG00000075825	dlec1	protein_coding	24	deleted in lung and esophageal cancer 1 [Source:ZFIN;Acc:ZDB-GENE-091204-65]
ENSDARG00000075884	shprh	protein_coding	17	SNF2 histone linker PHD RING helicase [Source:ZFIN;Acc:ZDB-GENE-110512-2]
ENSDARG00000075919	ccser1	protein_coding	8	coiled-coil serine-rich protein 1 [Source:ZFIN;Acc:ZDB-GENE-081104-422]
ENSDARG00000075975	slc45a3	protein_coding	11	solute carrier family 45, member 3 [Source:ZFIN;Acc:ZDB-GENE-070509-3]
ENSDARG00000075980	tmem125b	protein_coding	2	transmembrane protein 125b [Source:ZFIN;Acc:ZDB-GENE-080220-54]
ENSDARG00000075996	si:dkey-103d23.5	protein_coding	9	si:dkey-103d23.5 [Source:ZFIN;Acc:ZDB-GENE-110131-6]
ENSDARG00000076014	ERC1	protein_coding	4	si:dkey-222l13.1 [Source:ZFIN;Acc:ZDB-GENE-110411-39]
ENSDARG00000076020	pappa2	protein_coding	2	pappalysin 2 [Source:ZFIN;Acc:ZDB-GENE-070912-525]
ENSDARG00000076055	rpgrip1	protein_coding	24	RPGR interacting protein 1 [Source:ZFIN;Acc:ZDB-GENE-091204-394]
ENSDARG00000076068	crtc1a	protein_coding	2	CREB regulated transcription coactivator 1a [Source:ZFIN;Acc:ZDB-GENE-061027-225]
ENSDARG00000076153	lca5	protein_coding	23	Leber congenital amaurosis 5 [Source:ZFIN;Acc:ZDB-GENE-090313-268]
ENSDARG00000076246	prune	protein_coding	16	prune exopolyphosphatase [Source:ZFIN;Acc:ZDB-GENE-100609-1]
ENSDARG00000076251	irf3	protein_coding	12	interferon regulatory factor 3 [Source:ZFIN;Acc:ZDB-GENE-071120-7]
ENSDARG00000076292	tns2a	protein_coding	23	tensin 2a [Source:ZFIN;Acc:ZDB-GENE-090312-163]
ENSDARG00000076308	pdp1	protein_coding	16	pyruvate dehyrogenase phosphatase catalytic subunit 1 [Source:ZFIN;Acc:ZDB-GENE-060810-70]
ENSDARG00000076318	atp6v1ab	protein_coding	24	ATPase H+ transporting V1 subunit Ab [Source:ZFIN;Acc:ZDB-GENE-030131-9529]
ENSDARG00000076343	si:dkeyp-13d11.1	protein_coding	1	si:dkeyp-13d11.1 [Source:ZFIN;Acc:ZDB-GENE-090313-377]
ENSDARG00000076348	mylk3	protein_coding	7	myosin light chain kinase 3 [Source:ZFIN;Acc:ZDB-GENE-030131-3497]
ENSDARG00000076434	ARHGAP22	protein_coding	12	si:dkey-191m6.4 [Source:ZFIN;Acc:ZDB-GENE-121214-182]
ENSDARG00000076530	jac6	protein_coding	7	jacalin 6 [Source:ZFIN;Acc:ZDB-GENE-090610-2]
ENSDARG00000076557	bicc2	protein_coding	14	bicaudal C homolog 2 [Source:ZFIN;Acc:ZDB-GENE-110110-3]
ENSDARG00000076592	man1b1b	protein_coding	5	mannosidase, alpha, class 1B, member 1b [Source:ZFIN;Acc:ZDB-GENE-070705-482]
ENSDARG00000076699	ipmka	protein_coding	13	inositol polyphosphate multikinase a [Source:ZFIN;Acc:ZDB-GENE-090312-161]
ENSDARG00000076773	lrrc58a	protein_coding	1	leucine rich repeat containing 58a [Source:ZFIN;Acc:ZDB-GENE-090312-76]
ENSDARG00000076848	LGALS3BP (1 of many)	protein_coding	3	zgc:112492 [Source:ZFIN;Acc:ZDB-GENE-050417-143]
ENSDARG00000076958	jac8	protein_coding	7	jacalin 8 [Source:ZFIN;Acc:ZDB-GENE-080218-18]
ENSDARG00000077002	igsf3	protein_coding	9	immunoglobulin superfamily, member 3 [Source:ZFIN;Acc:ZDB-GENE-070912-243]
ENSDARG00000077090	si:ch211-127b11.1	protein_coding	4	si:ch211-127b11.1 [Source:ZFIN;Acc:ZDB-GENE-041210-159]
ENSDARG00000077120	arid5a	protein_coding	8	AT rich interactive domain 5A (MRF1-like) [Source:ZFIN;Acc:ZDB-GENE-100525-3]
ENSDARG00000077252	si:rp71-36a1.5	protein_coding	22	si:rp71-36a1.5 [Source:ZFIN;Acc:ZDB-GENE-091204-428]
ENSDARG00000077341	ppp1r14c	protein_coding	23	protein phosphatase 1, regulatory (inhibitor) subunit 14C [Source:ZFIN;Acc:ZDB-GENE-050706-92]
ENSDARG00000077557	nitr5	protein_coding	7	novel immune-type receptor 5 [Source:ZFIN;Acc:ZDB-GENE-020225-40]
ENSDARG00000077573	tmprss13b	protein_coding	5	transmembrane protease, serine 13b [Source:ZFIN;Acc:ZDB-GENE-090309-2]
ENSDARG00000077590	arsj	protein_coding	7	arylsulfatase family, member J [Source:ZFIN;Acc:ZDB-GENE-111215-1]
ENSDARG00000077792	cdc42ep1b	protein_coding	3	CDC42 effector protein (Rho GTPase binding) 1b [Source:ZFIN;Acc:ZDB-GENE-120215-219]
ENSDARG00000077853	ttll2	protein_coding	20	tubulin tyrosine ligase-like family, member 2 [Source:ZFIN;Acc:ZDB-GENE-041014-297]
ENSDARG00000077948	usp54a	protein_coding	13	ubiquitin specific peptidase 54a [Source:ZFIN;Acc:ZDB-GENE-090828-2]
ENSDARG00000077979	tmem26a	protein_coding	17	transmembrane protein 26a [Source:ZFIN;Acc:ZDB-GENE-101223-2]
ENSDARG00000077998	nitr3a	protein_coding	7	novel immune-type receptor 3a [Source:ZFIN;Acc:ZDB-GENE-001106-8]
ENSDARG00000078001	kbtbd7	protein_coding	9	kelch repeat and BTB (POZ) domain containing 7 [Source:ZFIN;Acc:ZDB-GENE-070912-204]
ENSDARG00000078016	dtx4	protein_coding	1	deltex 4, E3 ubiquitin ligase [Source:ZFIN;Acc:ZDB-GENE-070410-129]
ENSDARG00000078066	elk1	protein_coding	8	ELK1, member of ETS oncogene family [Source:ZFIN;Acc:ZDB-GENE-090529-5]
ENSDARG00000078102	si:ch211-150i13.1	protein_coding	13	si:ch211-150i13.1 [Source:ZFIN;Acc:ZDB-GENE-090313-44]
ENSDARG00000078179	fndc3ba	protein_coding	2	fibronectin type III domain containing 3Ba [Source:ZFIN;Acc:ZDB-GENE-070510-1]
ENSDARG00000078185	pacs2	protein_coding	13	phosphofurin acidic cluster sorting protein 2 [Source:ZFIN;Acc:ZDB-GENE-081218-1]
ENSDARG00000078222	aatka	protein_coding	3	apoptosis-associated tyrosine kinase a [Source:ZFIN;Acc:ZDB-GENE-100812-4]
ENSDARG00000078238	nacc1b	protein_coding	11	nucleus accumbens associated 1, BEN and BTB (POZ) domain containing b [Source:ZFIN;Acc:ZDB-GENE-121212-1]
ENSDARG00000078245	gal3st1b	protein_coding	10	galactose-3-O-sulfotransferase 1b [Source:ZFIN;Acc:ZDB-GENE-091117-38]
ENSDARG00000078251	si:ch211-113e8.3	protein_coding	1	si:ch211-113e8.3 [Source:ZFIN;Acc:ZDB-GENE-090312-74]
ENSDARG00000078258	CABZ01049847.1	protein_coding	10
ENSDARG00000078479	mocs1	protein_coding	17	molybdenum cofactor synthesis 1 [Source:ZFIN;Acc:ZDB-GENE-130215-1]
ENSDARG00000078508	si:dkey-266m15.6	protein_coding	18	si:dkey-266m15.6 [Source:ZFIN;Acc:ZDB-GENE-070705-443]
ENSDARG00000078561	lrig2	protein_coding	6	leucine-rich repeats and immunoglobulin-like domains 2 [Source:ZFIN;Acc:ZDB-GENE-041111-75]
ENSDARG00000078603	myo1hb	protein_coding	5	myosin IHb [Source:ZFIN;Acc:ZDB-GENE-070705-355]
ENSDARG00000078620	si:dkey-156m2.3	protein_coding	1	si:dkey-156m2.3 [Source:ZFIN;Acc:ZDB-GENE-121213-8]
ENSDARG00000078624	arhgef9b	protein_coding	14	Cdc42 guanine nucleotide exchange factor (GEF) 9b [Source:ZFIN;Acc:ZDB-GENE-030131-7745]
ENSDARG00000078650	kcna4	protein_coding	7	potassium voltage-gated channel, shaker-related subfamily, member 4 [Source:ZFIN;Acc:ZDB-GENE-121127-2]
ENSDARG00000078694	phlpp1	protein_coding	2	PH domain and leucine rich repeat protein phosphatase 1 [Source:ZFIN;Acc:ZDB-GENE-131127-271]
ENSDARG00000078707	sema7a	protein_coding	25	semaphorin 7A [Source:ZFIN;Acc:ZDB-GENE-030131-3633]
ENSDARG00000079065	zgc:172215	protein_coding	14	zgc:172215 [Source:ZFIN;Acc:ZDB-GENE-080204-63]
ENSDARG00000079071	jam2b	protein_coding	9	junctional adhesion molecule 2b [Source:ZFIN;Acc:ZDB-GENE-080229-3]
ENSDARG00000079079	sult1st7	protein_coding	8	sulfotransferase family 1, cytosolic sulfotransferase 7 [Source:ZFIN;Acc:ZDB-GENE-081112-3]
ENSDARG00000079191	zgc:172122	protein_coding	1	zgc:172122 [Source:ZFIN;Acc:ZDB-GENE-080208-1]
ENSDARG00000079267	FERMT3 (1 of many)	protein_coding	5	im:7154036 [Source:ZFIN;Acc:ZDB-GENE-080917-11]
ENSDARG00000079280	dhrsx	protein_coding	1	dehydrogenase/reductase (SDR family) X-linked [Source:ZFIN;Acc:ZDB-GENE-060620-2]
ENSDARG00000079286	bcr	protein_coding	21	breakpoint cluster region [Source:ZFIN;Acc:ZDB-GENE-040724-43]
ENSDARG00000079415	dnajc30b	protein_coding	15	DnaJ (Hsp40) homolog, subfamily C, member 30b [Source:ZFIN;Acc:ZDB-GENE-131121-532]
ENSDARG00000079470	cdk17	protein_coding	4	cyclin-dependent kinase 17 [Source:ZFIN;Acc:ZDB-GENE-041210-15]
ENSDARG00000079502	gal3st2	protein_coding	15	galactose-3-O-sulfotransferase 2 [Source:ZFIN;Acc:ZDB-GENE-131127-533]
ENSDARG00000079542	stard13a	protein_coding	10	StAR-related lipid transfer (START) domain containing 13a [Source:ZFIN;Acc:ZDB-GENE-091116-18]
ENSDARG00000079611	sema4c	protein_coding	5	sema domain, immunoglobulin domain (Ig), transmembrane domain (TM) and short cytoplasmic domain, (semaphorin) 4C [Source:ZFIN;Acc:ZDB-GENE-080303-16]
ENSDARG00000079618	sik2a	protein_coding	5	salt-inducible kinase 2a [Source:ZFIN;Acc:ZDB-GENE-070705-451]
ENSDARG00000079784	si:ch211-235o23.1	protein_coding	2	si:ch211-235o23.1 [Source:ZFIN;Acc:ZDB-GENE-070912-222]
ENSDARG00000079791	si:ch211-176g6.2	protein_coding	12	si:ch211-176g6.2 [Source:ZFIN;Acc:ZDB-GENE-121214-224]
ENSDARG00000079805	tagln3a	protein_coding	5	transgelin 3a [Source:ZFIN;Acc:ZDB-GENE-060531-53]
ENSDARG00000086037	CR626890.1	protein_coding	CHR_ALT_CTG15_1_14
ENSDARG00000086052	si:ch211-106k21.5	protein_coding	2	si:ch211-106k21.5 [Source:ZFIN;Acc:ZDB-GENE-070912-7]
ENSDARG00000086104	slco5a1b	protein_coding	2	solute carrier organic anion transporter family member 5A1b [Source:ZFIN;Acc:ZDB-GENE-070912-587]
ENSDARG00000086166	si:ch211-286b5.9	protein_coding	1	si:ch211-286b5.9 [Source:ZFIN;Acc:ZDB-GENE-121214-63]
ENSDARG00000086272	si:dkey-4p15.5	protein_coding	15	si:dkey-4p15.5 [Source:ZFIN;Acc:ZDB-GENE-121214-193]
ENSDARG00000086383	or111-8	protein_coding	15	odorant receptor, family D, subfamily 111, member 8 [Source:ZFIN;Acc:ZDB-GENE-010308-12]
ENSDARG00000086585	nrg2b	protein_coding	14	neuregulin 2b [Source:ZFIN;Acc:ZDB-GENE-090205-2]
ENSDARG00000086838	itga2.3	protein_coding	10	integrin, alpha 2 (CD49B, alpha 2 subunit of VLA-2 receptor), tandem duplicate 3 [Source:ZFIN;Acc:ZDB-GENE-091204-176]
ENSDARG00000086856	stk35	protein_coding	23	serine/threonine kinase 35 [Source:ZFIN;Acc:ZDB-GENE-061103-553]
ENSDARG00000086903	gig2o	protein_coding	5	grass carp reovirus (GCRV)-induced gene 2o [Source:ZFIN;Acc:ZDB-GENE-130517-8]
ENSDARG00000086933	tnni3k	protein_coding	8	TNNI3 interacting kinase [Source:ZFIN;Acc:ZDB-GENE-081104-399]
ENSDARG00000086985	klc4	protein_coding	22	kinesin light chain 4 [Source:ZFIN;Acc:ZDB-GENE-050417-350]
ENSDARG00000087074	znf574	protein_coding	16	zinc finger protein 574 [Source:ZFIN;Acc:ZDB-GENE-100922-259]
ENSDARG00000087224	si:ch73-380n15.2	protein_coding	1	si:ch73-380n15.2 [Source:ZFIN;Acc:ZDB-GENE-090313-161]
ENSDARG00000087262	zgc:63568	protein_coding	14	zgc:63568 [Source:ZFIN;Acc:ZDB-GENE-040426-1165]
ENSDARG00000087446	mmd2a	protein_coding	3	monocyte to macrophage differentiation-associated 2a [Source:ZFIN;Acc:ZDB-GENE-081104-52]
ENSDARG00000087453	si:ch73-57f22.2	protein_coding	20	si:ch73-57f22.2 [Source:ZFIN;Acc:ZDB-GENE-110411-58]
ENSDARG00000087921	plce1	protein_coding	12	phospholipase C, epsilon 1 [Source:ZFIN;Acc:ZDB-GENE-061212-4]
ENSDARG00000088124	adrb2a	protein_coding	14	adrenoceptor beta 2, surface a [Source:ZFIN;Acc:ZDB-GENE-100414-3]
ENSDARG00000088222	fam78ab	protein_coding	5	family with sequence similarity 78, member Ab [Source:ZFIN;Acc:ZDB-GENE-080220-25]
ENSDARG00000088861	znf1021	protein_coding	4	zinc finger protein 1021 [Source:ZFIN;Acc:ZDB-GENE-110913-143]
ENSDARG00000089216	zmp:0000001268	protein_coding	21	zmp:0000001268 [Source:ZFIN;Acc:ZDB-GENE-140106-228]
ENSDARG00000089354	tspan4a	protein_coding	18	tetraspanin 4a [Source:ZFIN;Acc:ZDB-GENE-040718-38]
ENSDARG00000089357	miga2	protein_coding	21	mitoguardin 2 [Source:ZFIN;Acc:ZDB-GENE-050320-135]
ENSDARG00000089413	mbpb	protein_coding	16	myelin basic protein b [Source:ZFIN;Acc:ZDB-GENE-030429-21]
ENSDARG00000089477	si:ch211-132g1.3	protein_coding	1	si:ch211-132g1.3 [Source:ZFIN;Acc:ZDB-GENE-090312-148]
ENSDARG00000089581	nhlrc2	protein_coding	12	NHL repeat containing 2 [Source:ZFIN;Acc:ZDB-GENE-100318-2]
ENSDARG00000089637	rnaseh2c	protein_coding	14	ribonuclease H2, subunit C [Source:ZFIN;Acc:ZDB-GENE-030131-2469]
ENSDARG00000089888	daglb	protein_coding	12	diacylglycerol lipase, beta [Source:ZFIN;Acc:ZDB-GENE-070619-2]
ENSDARG00000089913	cacna1g	protein_coding	12	calcium channel, voltage-dependent, T type, alpha 1G subunit [Source:ZFIN;Acc:ZDB-GENE-090514-2]
ENSDARG00000089952	si:ch211-147k9.8	protein_coding	25	si:ch211-147k9.8 [Source:ZFIN;Acc:ZDB-GENE-120709-101]
ENSDARG00000090035	rtn4r	protein_coding	5	reticulon 4 receptor [Source:ZFIN;Acc:ZDB-GENE-040310-1]
ENSDARG00000090039	reck	protein_coding	24	reversion-inducing-cysteine-rich protein with kazal motifs [Source:ZFIN;Acc:ZDB-GENE-070117-37]
ENSDARG00000090190	bcam	protein_coding	16	basal cell adhesion molecule (Lutheran blood group) [Source:ZFIN;Acc:ZDB-GENE-060929-620]
ENSDARG00000090338	fam20cb	protein_coding	12	family with sequence similarity 20, member Cb [Source:ZFIN;Acc:ZDB-GENE-050301-4]
ENSDARG00000090537	ifit11	protein_coding	12	interferon-induced protein with tetratricopeptide repeats 11 [Source:ZFIN;Acc:ZDB-GENE-121214-302]
ENSDARG00000090679	si:ch211-79k12.2	protein_coding	16	si:ch211-79k12.2 [Source:ZFIN;Acc:ZDB-GENE-131121-535]
ENSDARG00000090820	slc2a10	protein_coding	11	solute carrier family 2 (facilitated glucose transporter), member 10 [Source:ZFIN;Acc:ZDB-GENE-080204-6]
ENSDARG00000090890	cmklr1	protein_coding	5	chemokine-like receptor 1 [Source:ZFIN;Acc:ZDB-GENE-060526-126]
ENSDARG00000090973	si:dkey-264d12.1	protein_coding	11	si:dkey-264d12.1 [Source:ZFIN;Acc:ZDB-GENE-141215-69]
ENSDARG00000091085	lepa	protein_coding	18	leptin a [Source:ZFIN;Acc:ZDB-GENE-081001-1]
ENSDARG00000091215	rpz2	protein_coding	16	rapunzel 2 [Source:ZFIN;Acc:ZDB-GENE-030131-9071]
ENSDARG00000091584	si:ch73-217n20.1	protein_coding	23	si:ch73-217n20.1 [Source:ZFIN;Acc:ZDB-GENE-110411-232]
ENSDARG00000091619	mvb12ba	protein_coding	5	multivesicular body subunit 12Ba [Source:ZFIN;Acc:ZDB-GENE-060929-372]
ENSDARG00000091699	capn2a	protein_coding	13	calpain 2, (m/II) large subunit a [Source:ZFIN;Acc:ZDB-GENE-050320-69]
ENSDARG00000091791	or111-5	protein_coding	15	odorant receptor, family D, subfamily 111, member 5 [Source:ZFIN;Acc:ZDB-GENE-000329-14]
ENSDARG00000091835	si:ch73-264p11.1	protein_coding	24	si:ch73-264p11.1 [Source:ZFIN;Acc:ZDB-GENE-120703-35]
ENSDARG00000091993	dicp1.1	protein_coding	3	diverse immunoglobulin domain-containing protein 1.1 [Source:ZFIN;Acc:ZDB-GENE-120305-1]
ENSDARG00000092025	si:dkey-121n8.7	protein_coding	15	si:dkey-121n8.7 [Source:ZFIN;Acc:ZDB-GENE-070912-366]
ENSDARG00000092162	mhc1zaa	protein_coding	3	major histocompatibility complex class I ZAA [Source:ZFIN;Acc:ZDB-GENE-030916-1]
ENSDARG00000092180	si:dkey-40m6.11	protein_coding	16	si:dkey-40m6.11 [Source:ZFIN;Acc:ZDB-GENE-100921-31]
ENSDARG00000092240	si:ch211-243a20.3	protein_coding	1	si:ch211-243a20.3 [Source:ZFIN;Acc:ZDB-GENE-061207-28]
ENSDARG00000092352	jac4	protein_coding	7	jacalin 4 [Source:ZFIN;Acc:ZDB-GENE-030131-8643]
ENSDARG00000092489	si:ch73-103b9.2	protein_coding	18	si:ch73-103b9.2 [Source:ZFIN;Acc:ZDB-GENE-070705-199]
ENSDARG00000092532	si:dkey-21e2.8	protein_coding	22	si:dkey-21e2.8 [Source:ZFIN;Acc:ZDB-GENE-050208-459]
ENSDARG00000092567	si:dkey-61l1.4	protein_coding	5	si:dkey-61l1.4 [Source:ZFIN;Acc:ZDB-GENE-070705-483]
ENSDARG00000092883	si:dkey-193b15.5	protein_coding	2	si:dkey-193b15.5 [Source:ZFIN;Acc:ZDB-GENE-070912-413]
ENSDARG00000092987	zmat4a	protein_coding	5	zinc finger, matrin-type 4a [Source:ZFIN;Acc:ZDB-GENE-081104-333]
ENSDARG00000093024	si:ch211-213a13.2	protein_coding	22	si:ch211-213a13.2 [Source:ZFIN;Acc:ZDB-GENE-050208-551]
ENSDARG00000093188	si:dkey-75a21.2	protein_coding	8	si:dkey-75a21.2 [Source:ZFIN;Acc:ZDB-GENE-030131-6823]
ENSDARG00000093267	cngk	protein_coding	13	cyclic nucleotide-gated potassium channel [Source:ZFIN;Acc:ZDB-GENE-081107-57]
ENSDARG00000093349	si:ch211-141e20.2	protein_coding	9	si:ch211-141e20.2 [Source:ZFIN;Acc:ZDB-GENE-070912-75]
ENSDARG00000093420	creb1b	protein_coding	9	cAMP responsive element binding protein 1b [Source:ZFIN;Acc:ZDB-GENE-050417-355]
ENSDARG00000093477	cyp46a1.1	protein_coding	20	cytochrome P450, family 46, subfamily A, polypeptide 1, tandem duplicate 1 [Source:ZFIN;Acc:ZDB-GENE-050522-464]
ENSDARG00000094160	si:ch73-160h15.3	protein_coding	1	si:ch73-160h15.3 [Source:ZFIN;Acc:ZDB-GENE-100922-213]
ENSDARG00000094224	si:dkey-219e20.2	protein_coding	20	si:dkey-219e20.2 [Source:ZFIN;Acc:ZDB-GENE-041001-105]
ENSDARG00000094426	her4.2	protein_coding	23	hairy-related 4, tandem duplicate 2 [Source:ZFIN;Acc:ZDB-GENE-060815-1]
ENSDARG00000094451	cfp	protein_coding	8	complement factor properdin [Source:ZFIN;Acc:ZDB-GENE-030131-9247]
ENSDARG00000094491	si:ch211-202m22.1	protein_coding	13	si:ch211-202m22.1 [Source:ZFIN;Acc:ZDB-GENE-060531-31]
ENSDARG00000094514	si:dkey-7l6.3	protein_coding	2	si:dkey-7l6.3 [Source:ZFIN;Acc:ZDB-GENE-070912-586]
ENSDARG00000094540	si:dkey-96l17.6	protein_coding	5	si:dkey-96l17.6 [Source:ZFIN;Acc:ZDB-GENE-060526-350]
ENSDARG00000095180	abr	protein_coding	5	active BCR-related [Source:ZFIN;Acc:ZDB-GENE-070705-146]
ENSDARG00000095198	znf1132	protein_coding	4	zinc finger protein 1132 [Source:ZFIN;Acc:ZDB-GENE-110914-67]
ENSDARG00000095497	si:dkeyp-2e4.5	protein_coding	13	si:dkeyp-2e4.5 [Source:ZFIN;Acc:ZDB-GENE-061009-49]
ENSDARG00000095772	si:dkey-11o1.2	protein_coding	16	si:dkey-11o1.2 [Source:ZFIN;Acc:ZDB-GENE-100921-76]
ENSDARG00000095788	ghrhrl	protein_coding	23	growth hormone releasing hormone receptor, like [Source:ZFIN;Acc:ZDB-GENE-090211-1]
ENSDARG00000095853	si:ch211-57m13.3	protein_coding	10	si:ch211-57m13.3 [Source:ZFIN;Acc:ZDB-GENE-110411-155]
ENSDARG00000096034	si:ch73-289h5.5	protein_coding	4	si:ch73-289h5.5 [Source:ZFIN;Acc:ZDB-GENE-110914-179]
ENSDARG00000096214	si:ch211-197k17.3	protein_coding	1	si:ch211-197k17.3 [Source:ZFIN;Acc:ZDB-GENE-110914-193]
ENSDARG00000098113	CABZ01007222.1	protein_coding	17
ENSDARG00000098196	znf1077	protein_coding	4	zinc finger protein 1077 [Source:ZFIN;Acc:ZDB-GENE-080218-11]
ENSDARG00000098245	cidea	protein_coding	24	cell death-inducing DFFA-like effector a [Source:ZFIN;Acc:ZDB-GENE-091204-339]
ENSDARG00000098270	znf1053	protein_coding	4	zinc finger protein 1053 [Source:ZFIN;Acc:ZDB-GENE-121214-1]
ENSDARG00000098376	si:ch211-207l14.1	protein_coding	6	si:ch211-207l14.1 [Source:ZFIN;Acc:ZDB-GENE-120215-234]
ENSDARG00000098573	sgcd	protein_coding	21	sarcoglycan, delta (dystrophin-associated glycoprotein) [Source:ZFIN;Acc:ZDB-GENE-030131-3684]
ENSDARG00000098612	chrm2a	protein_coding	4	cholinergic receptor, muscarinic 2a [Source:ZFIN;Acc:ZDB-GENE-030314-1]
ENSDARG00000098663	fgf19	protein_coding	7	fibroblast growth factor 19 [Source:ZFIN;Acc:ZDB-GENE-030729-32]
ENSDARG00000098689	ptpn23b	protein_coding	19	protein tyrosine phosphatase, non-receptor type 23, b [Source:ZFIN;Acc:ZDB-GENE-060503-179]
ENSDARG00000098738	scn4aa	protein_coding	12	sodium channel, voltage-gated, type IV, alpha, a [Source:ZFIN;Acc:ZDB-GENE-051201-2]
ENSDARG00000098745	tfec	protein_coding	4	transcription factor EC [Source:ZFIN;Acc:ZDB-GENE-041210-21]
ENSDARG00000098800	znf1156	protein_coding	22	zinc finger protein 1156 [Source:ZFIN;Acc:ZDB-GENE-050208-787]
ENSDARG00000098903	tfe3a	protein_coding	8	transcription factor binding to IGHM enhancer 3a [Source:ZFIN;Acc:ZDB-GENE-010919-2]
ENSDARG00000099015	wacb	protein_coding	2	WW domain containing adaptor with coiled-coil b [Source:ZFIN;Acc:ZDB-GENE-041010-46]
ENSDARG00000099048	znf1070	protein_coding	4	zinc finger protein 1070 [Source:ZFIN;Acc:ZDB-GENE-080212-4]
ENSDARG00000099101	gch2	protein_coding	12	GTP cyclohydrolase 2 [Source:ZFIN;Acc:ZDB-GENE-001205-3]
ENSDARG00000099149	hs3st3b1a	protein_coding	3	heparan sulfate (glucosamine) 3-O-sulfotransferase 3B1a [Source:ZFIN;Acc:ZDB-GENE-070202-4]
ENSDARG00000099609	tpbga	protein_coding	19	trophoblast glycoprotein a [Source:ZFIN;Acc:ZDB-GENE-030827-4]
ENSDARG00000099728	zgc:56622	protein_coding	18	zgc:56622 [Source:ZFIN;Acc:ZDB-GENE-030131-4758]
ENSDARG00000099746	rgs3a	protein_coding	5	regulator of G protein signaling 3a [Source:ZFIN;Acc:ZDB-GENE-040801-150]
ENSDARG00000099849	ebf3a	protein_coding	14	early B cell factor 3a [Source:ZFIN;Acc:ZDB-GENE-070112-292]
ENSDARG00000099911	lrrc8c	protein_coding	6	leucine rich repeat containing 8 VRAC subunit C [Source:ZFIN;Acc:ZDB-GENE-030131-2965]
ENSDARG00000100081	dnai1.1	protein_coding	21	dynein, axonemal, intermediate chain 1, paralog 1 [Source:ZFIN;Acc:ZDB-GENE-040910-7]
ENSDARG00000100244	ebf3a	protein_coding	12	early B cell factor 3a [Source:ZFIN;Acc:ZDB-GENE-070112-292]
ENSDARG00000100352	aglb	protein_coding	24	amylo-alpha-1, 6-glucosidase, 4-alpha-glucanotransferase b [Source:ZFIN;Acc:ZDB-GENE-050309-54]
ENSDARG00000100397	pde6c	protein_coding	12	phosphodiesterase 6C, cGMP-specific, cone, alpha prime [Source:ZFIN;Acc:ZDB-GENE-040426-1664]
ENSDARG00000100398	pax7a	protein_coding	11	paired box 7a [Source:ZFIN;Acc:ZDB-GENE-990415-201]
ENSDARG00000100426	fam167b	protein_coding	17	family with sequence similarity 167, member B [Source:ZFIN;Acc:ZDB-GENE-131121-390]
ENSDARG00000100462	paqr7a	protein_coding	19	progestin and adipoQ receptor family member VII, a [Source:ZFIN;Acc:ZDB-GENE-070705-346]
ENSDARG00000100584	ccdc40	protein_coding	6	coiled-coil domain containing 40 [Source:ZFIN;Acc:ZDB-GENE-060503-723]
ENSDARG00000100591	sox32	protein_coding	7	SRY (sex determining region Y)-box 32 [Source:ZFIN;Acc:ZDB-GENE-011026-1]
ENSDARG00000100606	BX539336.1	protein_coding	23
ENSDARG00000100652	znf1147	protein_coding	4	zinc finger protein 1147 [Source:ZFIN;Acc:ZDB-GENE-080218-13]
ENSDARG00000100862	gprc5c	protein_coding	12	G protein-coupled receptor, class C, group 5, member C [Source:ZFIN;Acc:ZDB-GENE-070928-27]
ENSDARG00000100919	slc5a2	protein_coding	15	solute carrier family 5 (sodium/glucose cotransporter), member 2 [Source:ZFIN;Acc:ZDB-GENE-040426-2498]
ENSDARG00000100973	arhgap24	protein_coding	21	Rho GTPase activating protein 24 [Source:ZFIN;Acc:ZDB-GENE-091118-20]
ENSDARG00000101380	cryabb	protein_coding	5	crystallin, alpha B, b [Source:ZFIN;Acc:ZDB-GENE-040718-419]
ENSDARG00000101449	grik5	protein_coding	16	glutamate receptor, ionotropic, kainate 5 [Source:ZFIN;Acc:ZDB-GENE-070821-6]
ENSDARG00000101471	fgd4a	protein_coding	18	FYVE, RhoGEF and PH domain containing 4a [Source:ZFIN;Acc:ZDB-GENE-050420-347]
ENSDARG00000101512	tmx4	protein_coding	17	thioredoxin-related transmembrane protein 4 [Source:ZFIN;Acc:ZDB-GENE-050706-155]
ENSDARG00000101644	ARHGEF17	protein_coding	18	si:ch211-248g20.5 [Source:ZFIN;Acc:ZDB-GENE-091204-478]
ENSDARG00000101914	metrnl	protein_coding	3	meteorin, glial cell differentiation regulator-like [Source:ZFIN;Acc:ZDB-GENE-040426-1917]
ENSDARG00000102018	btr25	protein_coding	19	bloodthirsty-related gene family, member 25 [Source:ZFIN;Acc:ZDB-GENE-070705-377]
ENSDARG00000102025	znf644b	protein_coding	6	zinc finger protein 644b [Source:ZFIN;Acc:ZDB-GENE-120214-23]
ENSDARG00000102060	zgc:92873	protein_coding	25	zgc:92873 [Source:ZFIN;Acc:ZDB-GENE-040718-182]
ENSDARG00000102142	ECE2	protein_coding	15	si:ch211-117a13.2 [Source:ZFIN;Acc:ZDB-GENE-160113-64]
ENSDARG00000102225	si:ch211-205a14.7	protein_coding	4	si:ch211-205a14.7 [Source:ZFIN;Acc:ZDB-GENE-050420-404]
ENSDARG00000102414	myhz1.1	protein_coding	22	myosin, heavy polypeptide 1.1, skeletal muscle [Source:ZFIN;Acc:ZDB-GENE-000322-5]
ENSDARG00000102424	si:ch211-114m9.1	protein_coding	3	si:ch211-114m9.1 [Source:ZFIN;Acc:ZDB-GENE-120215-49]
ENSDARG00000102551	jazf1a	protein_coding	19	JAZF zinc finger 1a [Source:ZFIN;Acc:ZDB-GENE-060503-492]
ENSDARG00000102568	si:ch73-106k19.2	protein_coding	11	si:ch73-106k19.2 [Source:ZFIN;Acc:ZDB-GENE-131121-349]
ENSDARG00000102701	eva1ba	protein_coding	16	eva-1 homolog Ba (C. elegans) [Source:ZFIN;Acc:ZDB-GENE-030131-8941]
ENSDARG00000102704	si:ch1073-376c22.1	protein_coding	19	si:ch1073-376c22.1 [Source:ZFIN;Acc:ZDB-GENE-141210-15]
ENSDARG00000102773	cacna1da	protein_coding	11	calcium channel, voltage-dependent, L type, alpha 1D subunit, a [Source:ZFIN;Acc:ZDB-GENE-030616-135]
ENSDARG00000102805	cyp2aa11	protein_coding	23	cytochrome P450, family 2, subfamily AA, polypeptide 11 [Source:ZFIN;Acc:ZDB-GENE-110114-3]
ENSDARG00000102828	mfsd11	protein_coding	3	major facilitator superfamily domain containing 11 [Source:ZFIN;Acc:ZDB-GENE-050913-140]
ENSDARG00000102889	sept15	protein_coding	25	septin 15 [Source:ZFIN;Acc:ZDB-GENE-061103-265]
ENSDARG00000102890	clrn1	protein_coding	15	clarin 1 [Source:ZFIN;Acc:ZDB-GENE-040718-420]
ENSDARG00000102912	gpr184	protein_coding	15	G protein-coupled receptor 184 [Source:ZFIN;Acc:ZDB-GENE-060929-1218]
ENSDARG00000103226	dhcr7	protein_coding	2	7-dehydrocholesterol reductase [Source:ZFIN;Acc:ZDB-GENE-030912-9]
ENSDARG00000103388	znf609a	protein_coding	25	zinc finger protein 609a [Source:ZFIN;Acc:ZDB-GENE-030131-6219]
ENSDARG00000103494	usp43a	protein_coding	6	ubiquitin specific peptidase 43a [Source:ZFIN;Acc:ZDB-GENE-100211-1]
ENSDARG00000103498	epd	protein_coding	5	ependymin [Source:ZFIN;Acc:ZDB-GENE-980526-111]
ENSDARG00000103607	wtip	protein_coding	18	WT1 interacting protein [Source:ZFIN;Acc:ZDB-GENE-050419-261]
ENSDARG00000103714	rab6a	protein_coding	10	RAB6A, member RAS oncogene family [Source:ZFIN;Acc:ZDB-GENE-040426-2849]
ENSDARG00000103783	cyyr1	protein_coding	1	cysteine/tyrosine-rich 1 [Source:ZFIN;Acc:ZDB-GENE-040426-2356]
ENSDARG00000103795	zgc:113348	protein_coding	21	zgc:113348 [Source:ZFIN;Acc:ZDB-GENE-050227-10]
ENSDARG00000103978	sh3bp5b	protein_coding	16	SH3-domain binding protein 5b (BTK-associated) [Source:ZFIN;Acc:ZDB-GENE-040426-2813]
ENSDARG00000103985	spry1	protein_coding	14	sprouty homolog 1, antagonist of FGF signaling (Drosophila) [Source:ZFIN;Acc:ZDB-GENE-081215-2]
ENSDARG00000104208	zgc:172128	protein_coding	4	zgc:172128 [Source:ZFIN;Acc:ZDB-GENE-080220-2]
ENSDARG00000104335	si:ch211-212k5.4	protein_coding	4	si:ch211-212k5.4 [Source:ZFIN;Acc:ZDB-GENE-110914-68]
ENSDARG00000104367	zgc:194469	protein_coding	6	zgc:194469 [Source:ZFIN;Acc:ZDB-GENE-081022-114]
ENSDARG00000104793	dgke	protein_coding	6	diacylglycerol kinase, epsilon [Source:ZFIN;Acc:ZDB-GENE-090512-7]
ENSDARG00000104864	klhdc2	protein_coding	17	kelch domain containing 2 [Source:ZFIN;Acc:ZDB-GENE-070410-69]
ENSDARG00000104890	si:dkey-82i20.1	protein_coding	4	si:dkey-82i20.1 [Source:ZFIN;Acc:ZDB-GENE-081104-500]
ENSDARG00000104894	si:ch73-138e16.2	protein_coding	22	si:ch73-138e16.2 [Source:ZFIN;Acc:ZDB-GENE-070705-201]
ENSDARG00000105040	fam69c	protein_coding	24	family with sequence similarity 69, member C [Source:ZFIN;Acc:ZDB-GENE-030131-8001]
ENSDARG00000105088	tenm4	protein_coding	15	teneurin transmembrane protein 4 [Source:ZFIN;Acc:ZDB-GENE-990714-20]
ENSDARG00000105114	crebrf	protein_coding	21	creb3 regulatory factor [Source:ZFIN;Acc:ZDB-GENE-120203-3]
ENSDARG00000105120	gab2	protein_coding	15	GRB2-associated binding protein 2 [Source:ZFIN;Acc:ZDB-GENE-130530-756]
ENSDARG00000105215	kdrl	protein_coding	14	kinase insert domain receptor like [Source:ZFIN;Acc:ZDB-GENE-000705-1]
ENSDARG00000105281	p2ry1	protein_coding	18	purinergic receptor P2Y1 [Source:ZFIN;Acc:ZDB-GENE-121004-2]
ENSDARG00000105287	mpp1	protein_coding	21	membrane protein, palmitoylated 1 [Source:ZFIN;Acc:ZDB-GENE-031113-4]
ENSDARG00000100680	slc22a17	protein_coding	24	solute carrier family 22, member 17
ENSDARG00000071279	si:dkey-4c23.5	protein_coding	22	novel protein
ENSDARG00000096139	si:dkey-16b10.1	protein_coding	4	novel protein
ENSDARG00000092776	si:ch73-209l12.1	protein_coding	10	novel protein
ENSDARG00000011208	cox5b1	protein_coding	8	cytochrome c oxidase subunit V
ENSDARG00000100022
ENSDARG00000057230	NCEH1 (1 of 3)	protein_coding	2	neutral cholesterol ester hydrolase 1
ENSDARG00000102233	oxld1	protein_coding	12	oxidoreductase-like domain containing 1
ENSDARG00000091236	cst14b.2	protein_coding	5	cystatin 14b, tandem duplicate 2
ENSDARG00000089957	lgi2a	protein_coding	7	leucine-rich repeat LGI family, member 2a [Source:ZFIN;Acc:ZDB-GENE-060217-2]
