# Supplementary material for: Evolutionarily novel genes are expressed in transgenic fish tumors and their orthologs are involved in development of progressive traits in humans
Source: Infect Agent Cancer. 2019 Dec 5;14:46. doi: 10.1186/s13027-019-0262-5 (PMC6896781; doi:10.1186/s13027-019-0262-5)
Supplement: Supplementary file 9 — Additional file 9. GO annotation with all evidence codes for 870 fish genes from the sample. [file 13027_2019_262_MOESM9_ESM.xls]

## Sheet: Лист1
GO annotation with all evidence codes for 870 fish genes from the sample
Gene stable ID	Gene name	GO term accession	GO term name	GO term evidence code
ENSDARG00000000229	usp49	GO:0046872	metal ion binding	IEA
ENSDARG00000000229	usp49	GO:0016787	hydrolase activity	IEA
ENSDARG00000000229	usp49	GO:0008233	peptidase activity	IEA
ENSDARG00000000229	usp49	GO:0006508	proteolysis	IEA
ENSDARG00000000229	usp49	GO:0008270	zinc ion binding	IEA
ENSDARG00000000229	usp49	GO:0008234	cysteine-type peptidase activity	IEA
ENSDARG00000000229	usp49	GO:0006511	ubiquitin-dependent protein catabolic process	IEA
ENSDARG00000000229	usp49	GO:0036459	thiol-dependent ubiquitinyl hydrolase activity	IEA
ENSDARG00000000229	usp49	GO:0016579	protein deubiquitination	IEA
ENSDARG00000000551	slc1a4	GO:0006810	transport	IEA
ENSDARG00000000551	slc1a4	GO:0016020	membrane	IEA
ENSDARG00000000551	slc1a4	GO:0016021	integral component of membrane	IEA
ENSDARG00000000551	slc1a4	GO:0015293	symporter activity	IEA
ENSDARG00000000551	slc1a4	GO:0055085	transmembrane transport	IEA
ENSDARG00000001463	tdh2	GO:0005575	cellular_component	ND
ENSDARG00000001463	tdh2	GO:0003824	catalytic activity	IEA
ENSDARG00000001463	tdh2	GO:0050662	coenzyme binding	IEA
ENSDARG00000001463	tdh2
ENSDARG00000001721	oc90	GO:0005509	calcium ion binding	IEA
ENSDARG00000001721	oc90	GO:0005576	extracellular region	IEA
ENSDARG00000001721	oc90	GO:0004623	phospholipase A2 activity	IEA
ENSDARG00000001721	oc90	GO:0006644	phospholipid metabolic process	IEA
ENSDARG00000001721	oc90	GO:0016042	lipid catabolic process	IEA
ENSDARG00000001721	oc90	GO:0050482	arachidonic acid secretion	IEA
ENSDARG00000001721	oc90	GO:0048840	otolith development	IGI
ENSDARG00000001721	oc90	GO:0048840	otolith development	IMP
ENSDARG00000001835	nalcn	GO:0016020	membrane	IEA
ENSDARG00000001835	nalcn	GO:0005216	ion channel activity	IEA
ENSDARG00000001835	nalcn	GO:0006811	ion transport	IEA
ENSDARG00000001835	nalcn	GO:0034220	ion transmembrane transport	IEA
ENSDARG00000001835	nalcn	GO:0016021	integral component of membrane	IEA
ENSDARG00000001835	nalcn	GO:0055085	transmembrane transport	IEA
ENSDARG00000001835	nalcn	GO:0098655	cation transmembrane transport	IEA
ENSDARG00000001835	nalcn	GO:0005261	cation channel activity	IEA
ENSDARG00000001835	nalcn	GO:0005886	plasma membrane	IBA
ENSDARG00000001835	nalcn	GO:0086010	membrane depolarization during action potential	IBA
ENSDARG00000001835	nalcn	GO:0034220	ion transmembrane transport	IBA
ENSDARG00000001835	nalcn	GO:0006816	calcium ion transport	IBA
ENSDARG00000001835	nalcn	GO:0005261	cation channel activity	IBA
ENSDARG00000002217	scocb
ENSDARG00000002333	fam102bb
ENSDARG00000002391	tlcd1	GO:0016020	membrane	IEA
ENSDARG00000002391	tlcd1	GO:0016021	integral component of membrane	IEA
ENSDARG00000002391	tlcd1	GO:0008150	biological_process	ND
ENSDARG00000002391	tlcd1	GO:0003674	molecular_function	ND
ENSDARG00000002549	eif3eb	GO:0005737	cytoplasm	IEA
ENSDARG00000002549	eif3eb	GO:0005634	nucleus	IEA
ENSDARG00000002549	eif3eb	GO:0006412	translation	IEA
ENSDARG00000002549	eif3eb	GO:0003743	translation initiation factor activity	IEA
ENSDARG00000002549	eif3eb	GO:0005852	eukaryotic translation initiation factor 3 complex	IEA
ENSDARG00000002549	eif3eb	GO:0001731	formation of translation preinitiation complex	IEA
ENSDARG00000002549	eif3eb	GO:0006413	translational initiation	IEA
ENSDARG00000002549	eif3eb	GO:0006446	regulation of translational initiation	IEA
ENSDARG00000002549	eif3eb	GO:0016282	eukaryotic 43S preinitiation complex	IEA
ENSDARG00000002549	eif3eb	GO:0033290	eukaryotic 48S preinitiation complex	IEA
ENSDARG00000002593	slc45a2	GO:0016020	membrane	IEA
ENSDARG00000002593	slc45a2	GO:0016021	integral component of membrane	IEA
ENSDARG00000002593	slc45a2	GO:0043473	pigmentation	IMP
ENSDARG00000002593	slc45a2	GO:0003674	molecular_function	ND
ENSDARG00000002593	slc45a2	GO:0030318	melanocyte differentiation	IMP
ENSDARG00000002593	slc45a2	GO:0009416	response to light stimulus	IMP
ENSDARG00000002593	slc45a2	GO:0048066	developmental pigmentation	IMP
ENSDARG00000002701	rasl12	GO:0016020	membrane	IEA
ENSDARG00000002701	rasl12	GO:0003924	GTPase activity	IEA
ENSDARG00000002701	rasl12	GO:0005525	GTP binding	IEA
ENSDARG00000002701	rasl12	GO:0000166	nucleotide binding	IEA
ENSDARG00000002701	rasl12	GO:0007165	signal transduction	IEA
ENSDARG00000002991	cep135	GO:0005737	cytoplasm	IEA
ENSDARG00000002991	cep135	GO:0005856	cytoskeleton	IEA
ENSDARG00000002991	cep135	GO:0007099	centriole replication	IEA
ENSDARG00000002991	cep135	GO:0005814	centriole	IEA
ENSDARG00000002991	cep135	GO:0010457	centriole-centriole cohesion	IEA
ENSDARG00000003109	rcan1a	GO:0003676	nucleic acid binding	IEA
ENSDARG00000003109	rcan1a	GO:0005737	cytoplasm	IBA
ENSDARG00000003109	rcan1a	GO:0050790	regulation of catalytic activity	IEA
ENSDARG00000003109	rcan1a	GO:0002040	sprouting angiogenesis	IMP
ENSDARG00000003109	rcan1a	GO:0019722	calcium-mediated signaling	IEA
ENSDARG00000003109	rcan1a	GO:0033173	calcineurin-NFAT signaling cascade	IEA
ENSDARG00000003109	rcan1a	GO:0008597	calcium-dependent protein serine/threonine phosphatase regulator activity	IBA
ENSDARG00000003109	rcan1a	GO:0070884	regulation of calcineurin-NFAT signaling cascade	IBA
ENSDARG00000003109	rcan1a	GO:0005622	intracellular	IEA
ENSDARG00000003109	rcan1a
ENSDARG00000003449	pde10a	GO:0046872	metal ion binding	IEA
ENSDARG00000003449	pde10a	GO:0007165	signal transduction	IEA
ENSDARG00000003449	pde10a	GO:0008081	phosphoric diester hydrolase activity	IEA
ENSDARG00000003449	pde10a	GO:0016787	hydrolase activity	IEA
ENSDARG00000003449	pde10a	GO:0004114	3',5'-cyclic-nucleotide phosphodiesterase activity	IEA
ENSDARG00000003527	mak16	GO:0005634	nucleus	IEA
ENSDARG00000003527	mak16	GO:0005730	nucleolus	IEA
ENSDARG00000003527	mak16
ENSDARG00000003576	klhl32	GO:0005737	cytoplasm	IBA
ENSDARG00000003576	klhl32	GO:0004842	ubiquitin-protein transferase activity	IBA
ENSDARG00000003576	klhl32	GO:0016567	protein ubiquitination	IEA
ENSDARG00000003576	klhl32	GO:0031463	Cul3-RING ubiquitin ligase complex	IBA
ENSDARG00000003576	klhl32	GO:0007286	spermatid development	IBA
ENSDARG00000003576	klhl32	GO:0008584	male gonad development	IBA
ENSDARG00000003576	klhl32	GO:0009566	fertilization	IBA
ENSDARG00000003576	klhl32
ENSDARG00000003732	mitfa	GO:0043473	pigmentation	IGI
ENSDARG00000003732	mitfa	GO:0043473	pigmentation	IMP
ENSDARG00000003732	mitfa	GO:0030318	melanocyte differentiation	IGI
ENSDARG00000003732	mitfa	GO:0030318	melanocyte differentiation	IMP
ENSDARG00000003732	mitfa	GO:0006357	regulation of transcription from RNA polymerase II promoter	IEA
ENSDARG00000003732	mitfa	GO:0000981	RNA polymerase II transcription factor activity, sequence-specific DNA binding	IDA
ENSDARG00000003732	mitfa	GO:0007623	circadian rhythm	IDA
ENSDARG00000003732	mitfa	GO:0006351	transcription, DNA-templated	IDA
ENSDARG00000003732	mitfa	GO:0005654	nucleoplasm	IC
ENSDARG00000003732	mitfa	GO:0003700	transcription factor activity, sequence-specific DNA binding	IEA
ENSDARG00000003732	mitfa	GO:0046983	protein dimerization activity	IEA
ENSDARG00000003732	mitfa	GO:0006355	regulation of transcription, DNA-templated	IEA
ENSDARG00000003732	mitfa	GO:0005634	nucleus	IEA
ENSDARG00000003903	hapln2	GO:0005515	protein binding	IPI
ENSDARG00000003903	hapln2	GO:0042802	identical protein binding	IDA
ENSDARG00000003903	hapln2	GO:0007155	cell adhesion	IEA
ENSDARG00000003903	hapln2	GO:0005578	proteinaceous extracellular matrix	IBA
ENSDARG00000003903	hapln2	GO:0005201	extracellular matrix structural constituent	IBA
ENSDARG00000003903	hapln2	GO:0005540	hyaluronic acid binding	IEA
ENSDARG00000003903	hapln2	GO:0005540	hyaluronic acid binding	IBA
ENSDARG00000003903	hapln2	GO:0001501	skeletal system development	IBA
ENSDARG00000003903	hapln2	GO:0007417	central nervous system development	IBA
ENSDARG00000004243	asic4b	GO:0016020	membrane	IEA
ENSDARG00000004243	asic4b	GO:0006810	transport	IEA
ENSDARG00000004243	asic4b	GO:0006811	ion transport	IEA
ENSDARG00000004243	asic4b	GO:0005886	plasma membrane	IEA
ENSDARG00000004243	asic4b	GO:0016021	integral component of membrane	IEA
ENSDARG00000004243	asic4b	GO:0005272	sodium channel activity	IEA
ENSDARG00000004243	asic4b	GO:0006814	sodium ion transport	IEA
ENSDARG00000004243	asic4b	GO:0035725	sodium ion transmembrane transport	IEA
ENSDARG00000004243	asic4b	GO:0098655	cation transmembrane transport	IEA
ENSDARG00000004243	asic4b	GO:0005887	integral component of plasma membrane	IDA
ENSDARG00000004243	asic4b	GO:0005887	integral component of plasma membrane	IPI
ENSDARG00000004243	asic4b	GO:0005261	cation channel activity	IPI
ENSDARG00000004256	wnt11	GO:0005576	extracellular region	IEA
ENSDARG00000004256	wnt11	GO:0007275	multicellular organism development	IEA
ENSDARG00000004256	wnt11	GO:0016055	Wnt signaling pathway	IEA
ENSDARG00000004256	wnt11	GO:0005578	proteinaceous extracellular matrix	IEA
ENSDARG00000004256	wnt11	GO:0005102	receptor binding	IEA
ENSDARG00000004433	btk	GO:0016740	transferase activity	IEA
ENSDARG00000004433	btk	GO:0000166	nucleotide binding	IEA
ENSDARG00000004433	btk	GO:0005524	ATP binding	IEA
ENSDARG00000004433	btk	GO:0004672	protein kinase activity	IEA
ENSDARG00000004433	btk	GO:0006468	protein phosphorylation	IEA
ENSDARG00000004433	btk	GO:0004713	protein tyrosine kinase activity	IEA
ENSDARG00000004433	btk	GO:0016301	kinase activity	IEA
ENSDARG00000004433	btk	GO:0016310	phosphorylation	IEA
ENSDARG00000004433	btk	GO:0018108	peptidyl-tyrosine phosphorylation	IEA
ENSDARG00000004433	btk	GO:0005622	intracellular	IEA
ENSDARG00000004433	btk	GO:0035556	intracellular signal transduction	IEA
ENSDARG00000004433	btk	GO:0004715	non-membrane spanning protein tyrosine kinase activity	IEA
ENSDARG00000004433	btk	GO:0009952	anterior/posterior pattern specification	IGI
ENSDARG00000004433	btk	GO:0060828	regulation of canonical Wnt signaling pathway	IGI
ENSDARG00000004433	btk	GO:0030178	negative regulation of Wnt signaling pathway	IGI
ENSDARG00000004451	tnfrsfa	GO:0016020	membrane	IEA
ENSDARG00000004451	tnfrsfa	GO:0016021	integral component of membrane	IEA
ENSDARG00000004451	tnfrsfa	GO:0007165	signal transduction	IEA
ENSDARG00000004451	tnfrsfa	GO:0007275	multicellular organism development	IBA
ENSDARG00000004451	tnfrsfa	GO:0005887	integral component of plasma membrane	IBA
ENSDARG00000004451	tnfrsfa	GO:0006955	immune response	IBA
ENSDARG00000004451	tnfrsfa	GO:0006954	inflammatory response	IBA
ENSDARG00000004451	tnfrsfa	GO:0032496	response to lipopolysaccharide	IBA
ENSDARG00000004451	tnfrsfa	GO:0042127	regulation of cell proliferation	IBA
ENSDARG00000004451	tnfrsfa	GO:0043065	positive regulation of apoptotic process	IDA
ENSDARG00000004451	tnfrsfa	GO:0005031	tumor necrosis factor-activated receptor activity	IBA
ENSDARG00000004451	tnfrsfa	GO:0033209	tumor necrosis factor-mediated signaling pathway	IEA
ENSDARG00000004451	tnfrsfa	GO:0097190	apoptotic signaling pathway	IBA
ENSDARG00000004635	epha7	GO:0016740	transferase activity	IEA
ENSDARG00000004635	epha7	GO:0016020	membrane	IEA
ENSDARG00000004635	epha7	GO:0016021	integral component of membrane	IEA
ENSDARG00000004635	epha7	GO:0000166	nucleotide binding	IEA
ENSDARG00000004635	epha7	GO:0005524	ATP binding	IEA
ENSDARG00000004635	epha7	GO:0004672	protein kinase activity	IEA
ENSDARG00000004635	epha7	GO:0006468	protein phosphorylation	IEA
ENSDARG00000004635	epha7	GO:0004713	protein tyrosine kinase activity	IEA
ENSDARG00000004635	epha7	GO:0016301	kinase activity	IEA
ENSDARG00000004635	epha7	GO:0007169	transmembrane receptor protein tyrosine kinase signaling pathway	IEA
ENSDARG00000004635	epha7	GO:0016310	phosphorylation	IEA
ENSDARG00000004635	epha7	GO:0018108	peptidyl-tyrosine phosphorylation	IEA
ENSDARG00000004635	epha7	GO:0005887	integral component of plasma membrane	IEA
ENSDARG00000004635	epha7	GO:0005003	ephrin receptor activity	IEA
ENSDARG00000004635	epha7	GO:0048013	ephrin receptor signaling pathway	IEA
ENSDARG00000004712	tbr1b	GO:0003700	transcription factor activity, sequence-specific DNA binding	IEA
ENSDARG00000004712	tbr1b	GO:0006355	regulation of transcription, DNA-templated	IEA
ENSDARG00000004712	tbr1b	GO:0005634	nucleus	IEA
ENSDARG00000004712	tbr1b	GO:0003677	DNA binding	IEA
ENSDARG00000004712	tbr1b	GO:0006351	transcription, DNA-templated	IEA
ENSDARG00000005095	glcea	GO:0016020	membrane	IEA
ENSDARG00000005095	glcea	GO:0016021	integral component of membrane	IEA
ENSDARG00000005095	glcea	GO:0016021	integral component of membrane	ISS
ENSDARG00000005095	glcea	GO:0006024	glycosaminoglycan biosynthetic process	IEA
ENSDARG00000005095	glcea	GO:0009950	dorsal/ventral axis specification	IGI
ENSDARG00000005095	glcea	GO:0016857	racemase and epimerase activity, acting on carbohydrates and derivatives	IEA
ENSDARG00000005095	glcea	GO:0047464	heparosan-N-sulfate-glucuronate 5-epimerase activity	IGI
ENSDARG00000005095	glcea	GO:0030201	heparan sulfate proteoglycan metabolic process	IGI
ENSDARG00000005271	zc3h12a	GO:0046872	metal ion binding	IEA
ENSDARG00000005372	camk4	GO:0000166	nucleotide binding	IEA
ENSDARG00000005372	camk4	GO:0005524	ATP binding	IEA
ENSDARG00000005372	camk4	GO:0004672	protein kinase activity	IEA
ENSDARG00000005372	camk4	GO:0006468	protein phosphorylation	IEA
ENSDARG00000005372	camk4	GO:0046777	protein autophosphorylation	IBA
ENSDARG00000005372	camk4	GO:0016301	kinase activity	IEA
ENSDARG00000005372	camk4	GO:0016310	phosphorylation	IEA
ENSDARG00000005372	camk4	GO:0004674	protein serine/threonine kinase activity	IEA
ENSDARG00000005372	camk4	GO:0005634	nucleus	IDA
ENSDARG00000005372	camk4	GO:0004672	protein kinase activity	IDA
ENSDARG00000005372	camk4	GO:0045893	positive regulation of transcription, DNA-templated	IBA
ENSDARG00000005372	camk4	GO:0018105	peptidyl-serine phosphorylation	IBA
ENSDARG00000005372	camk4	GO:0035556	intracellular signal transduction	IBA
ENSDARG00000005372	camk4	GO:0005829	cytosol	IDA
ENSDARG00000005372	camk4	GO:0060216	definitive hemopoiesis	IMP
ENSDARG00000005372	camk4	GO:0004683	calmodulin-dependent protein kinase activity	IBA
ENSDARG00000005372	camk4	GO:0005516	calmodulin binding	IBA
ENSDARG00000005372	camk4	GO:0009931	calcium-dependent protein serine/threonine kinase activity	IBA
ENSDARG00000005479	tenm3	GO:0016021	integral component of membrane	IEA
ENSDARG00000005479	tenm3	GO:0007165	signal transduction	IEA
ENSDARG00000005479	tenm3	GO:0016020	membrane	IEA
ENSDARG00000005479	tenm3	GO:0005887	integral component of plasma membrane	IEA
ENSDARG00000005479	tenm3	GO:0097264	self proteolysis	IEA
ENSDARG00000005479	tenm3
ENSDARG00000005561	gfm2	GO:0003924	GTPase activity	IEA
ENSDARG00000005561	gfm2	GO:0005525	GTP binding	IEA
ENSDARG00000005561	gfm2	GO:0000166	nucleotide binding	IEA
ENSDARG00000005561	gfm2	GO:0005739	mitochondrion	IEA
ENSDARG00000005561	gfm2	GO:0006412	translation	IEA
ENSDARG00000005561	gfm2	GO:0003924	GTPase activity	ISS
ENSDARG00000005561	gfm2	GO:0032543	mitochondrial translation	ISS
ENSDARG00000005561	gfm2	GO:0032790	ribosome disassembly	IEA
ENSDARG00000005561	gfm2	GO:0032790	ribosome disassembly	ISS
ENSDARG00000005561	gfm2
ENSDARG00000005800	ampd3a	GO:0046872	metal ion binding	IEA
ENSDARG00000005800	ampd3a	GO:0016787	hydrolase activity	IEA
ENSDARG00000005800	ampd3a	GO:0003876	AMP deaminase activity	IEA
ENSDARG00000005800	ampd3a	GO:0019239	deaminase activity	IEA
ENSDARG00000005800	ampd3a	GO:0009168	purine ribonucleoside monophosphate biosynthetic process	IEA
ENSDARG00000005800	ampd3a	GO:0032264	IMP salvage	IEA
ENSDARG00000005834	gatad2b	GO:0003700	transcription factor activity, sequence-specific DNA binding	IEA
ENSDARG00000005834	gatad2b	GO:0006355	regulation of transcription, DNA-templated	IEA
ENSDARG00000005834	gatad2b	GO:0008270	zinc ion binding	IEA
ENSDARG00000005834	gatad2b	GO:0043565	sequence-specific DNA binding	IEA
ENSDARG00000005834	gatad2b	GO:0045879	negative regulation of smoothened signaling pathway	IMP
ENSDARG00000006220	ugt1ab	GO:0016740	transferase activity	IEA
ENSDARG00000006220	ugt1ab	GO:0016020	membrane	IEA
ENSDARG00000006220	ugt1ab	GO:0016021	integral component of membrane	IEA
ENSDARG00000006220	ugt1ab	GO:0016757	transferase activity, transferring glycosyl groups	IEA
ENSDARG00000006220	ugt1ab	GO:0008152	metabolic process	IEA
ENSDARG00000006220	ugt1ab	GO:0043231	intracellular membrane-bounded organelle	IBA
ENSDARG00000006220	ugt1ab	GO:0016758	transferase activity, transferring hexosyl groups	IEA
ENSDARG00000006220	ugt1ab	GO:0015020	glucuronosyltransferase activity	IDA
ENSDARG00000006220	ugt1ab	GO:0052696	flavonoid glucuronidation	IBA
ENSDARG00000006220	ugt1ab	GO:0052697	xenobiotic glucuronidation	IBA
ENSDARG00000006220	ugt1ab	GO:0015020	glucuronosyltransferase activity	IEA
ENSDARG00000006272	mpp5a	GO:0070830	bicellular tight junction assembly	IEA
ENSDARG00000006272	mpp5a	GO:0090162	establishment of epithelial cell polarity	IEA
ENSDARG00000006341	tas1r3	GO:0005886	plasma membrane	IEA
ENSDARG00000006341	tas1r3	GO:0016020	membrane	IEA
ENSDARG00000006341	tas1r3	GO:0016021	integral component of membrane	IEA
ENSDARG00000006341	tas1r3	GO:0004871	signal transducer activity	IEA
ENSDARG00000006341	tas1r3	GO:0004930	G-protein coupled receptor activity	IEA
ENSDARG00000006341	tas1r3	GO:0007165	signal transduction	IEA
ENSDARG00000006341	tas1r3	GO:0007186	G-protein coupled receptor signaling pathway	IEA
ENSDARG00000006636	slitrk2	GO:0016020	membrane	IEA
ENSDARG00000006636	slitrk2	GO:0016021	integral component of membrane	IEA
ENSDARG00000006636	slitrk2	GO:0007409	axonogenesis	IBA
ENSDARG00000006683	arhgef6	GO:0005089	Rho guanyl-nucleotide exchange factor activity	IEA
ENSDARG00000006683	arhgef6	GO:0035023	regulation of Rho protein signal transduction	IEA
ENSDARG00000006683	arhgef6	GO:0065009	regulation of molecular function	IEA
ENSDARG00000006683	arhgef6
ENSDARG00000006797	nt5dc1
ENSDARG00000006797	nt5dc1	GO:0016311	dephosphorylation	IEA
ENSDARG00000006797	nt5dc1	GO:0008253	5'-nucleotidase activity	IBA
ENSDARG00000006837	mycn	GO:0003700	transcription factor activity, sequence-specific DNA binding	IEA
ENSDARG00000006837	mycn	GO:0046983	protein dimerization activity	IEA
ENSDARG00000006837	mycn	GO:0006355	regulation of transcription, DNA-templated	IEA
ENSDARG00000006837	mycn	GO:0005634	nucleus	IEA
ENSDARG00000006892	myo3b	GO:0005524	ATP binding	IEA
ENSDARG00000006892	myo3b	GO:0003774	motor activity	IEA
ENSDARG00000006892	myo3b	GO:0016459	myosin complex	IEA
ENSDARG00000006892	myo3b
ENSDARG00000006892	myo3b	GO:0000166	nucleotide binding	IEA
ENSDARG00000006892	myo3b	GO:0004672	protein kinase activity	IEA
ENSDARG00000006892	myo3b	GO:0006468	protein phosphorylation	IEA
ENSDARG00000006939	tbx6l	GO:0003700	transcription factor activity, sequence-specific DNA binding	IEA
ENSDARG00000006939	tbx6l	GO:0006355	regulation of transcription, DNA-templated	IEA
ENSDARG00000006939	tbx6l	GO:0005634	nucleus	IEA
ENSDARG00000006939	tbx6l	GO:0003677	DNA binding	IEA
ENSDARG00000006939	tbx6l	GO:0006351	transcription, DNA-templated	IEA
ENSDARG00000007369	tcf7l1b	GO:0005634	nucleus	IEA
ENSDARG00000007369	tcf7l1b	GO:0006357	regulation of transcription from RNA polymerase II promoter	IEA
ENSDARG00000007369	tcf7l1b	GO:0003677	DNA binding	IEA
ENSDARG00000007369	tcf7l1b	GO:0016055	Wnt signaling pathway	IEA
ENSDARG00000007369	tcf7l1b	GO:0008013	beta-catenin binding	IEA
ENSDARG00000007369	tcf7l1b	GO:0060070	canonical Wnt signaling pathway	IEA
ENSDARG00000007383	kcnk6	GO:0016020	membrane	IEA
ENSDARG00000007383	kcnk6	GO:0006810	transport	IEA
ENSDARG00000007383	kcnk6	GO:0006811	ion transport	IEA
ENSDARG00000007383	kcnk6	GO:0016021	integral component of membrane	IEA
ENSDARG00000007383	kcnk6	GO:0005887	integral component of plasma membrane	IBA
ENSDARG00000007383	kcnk6	GO:0006813	potassium ion transport	IEA
ENSDARG00000007383	kcnk6	GO:0071805	potassium ion transmembrane transport	IBA
ENSDARG00000007383	kcnk6	GO:0005267	potassium channel activity	IEA
ENSDARG00000007383	kcnk6	GO:0071805	potassium ion transmembrane transport	IEA
ENSDARG00000007383	kcnk6	GO:0022841	potassium ion leak channel activity	IBA
ENSDARG00000007383	kcnk6	GO:0030322	stabilization of membrane potential	IBA
ENSDARG00000007396	rnd3b	GO:0003924	GTPase activity	IEA
ENSDARG00000007396	rnd3b	GO:0005525	GTP binding	IEA
ENSDARG00000007396	rnd3b	GO:0005622	intracellular	IEA
ENSDARG00000007396	rnd3b	GO:0000166	nucleotide binding	IEA
ENSDARG00000007396	rnd3b	GO:0007264	small GTPase mediated signal transduction	IEA
ENSDARG00000007396	rnd3b
ENSDARG00000007461	srgap1a	GO:0007165	signal transduction	IEA
ENSDARG00000007461	srgap1a	GO:0043547	positive regulation of GTPase activity	IEA
ENSDARG00000007461	srgap1a	GO:0005096	GTPase activator activity	IEA
ENSDARG00000007461	srgap1a	GO:0005737	cytoplasm	IBA
ENSDARG00000007461	srgap1a	GO:0005096	GTPase activator activity	IBA
ENSDARG00000007461	srgap1a	GO:0030336	negative regulation of cell migration	IBA
ENSDARG00000007461	srgap1a	GO:0048365	Rac GTPase binding	IBA
ENSDARG00000007560	sema3bl	GO:0005615	extracellular space	IBA
ENSDARG00000007560	sema3bl	GO:0038191	neuropilin binding	IBA
ENSDARG00000007560	sema3bl	GO:0050919	negative chemotaxis	IBA
ENSDARG00000007560	sema3bl	GO:0016020	membrane	IEA
ENSDARG00000007655	crybb1l3	GO:0008150	biological_process	ND
ENSDARG00000007655	crybb1l3	GO:0005575	cellular_component	ND
ENSDARG00000007655	crybb1l3	GO:0003674	molecular_function	ND
ENSDARG00000007944	lhx1b	GO:0006355	regulation of transcription, DNA-templated	IEA
ENSDARG00000007944	lhx1b	GO:0003677	DNA binding	IEA
ENSDARG00000007944	lhx1b	GO:0046872	metal ion binding	IEA
ENSDARG00000007944	lhx1b	GO:0005634	nucleus	IEA
ENSDARG00000007944	lhx1b	GO:0043565	sequence-specific DNA binding	IEA
ENSDARG00000008224	vps35	GO:0006810	transport	IEA
ENSDARG00000008224	vps35	GO:0015031	protein transport	IEA
ENSDARG00000008224	vps35	GO:0005829	cytosol	IEA
ENSDARG00000008224	vps35	GO:0030904	retromer complex	IEA
ENSDARG00000008224	vps35	GO:0008565	protein transporter activity	IEA
ENSDARG00000008224	vps35	GO:0042147	retrograde transport, endosome to Golgi	IEA
ENSDARG00000008224	vps35
ENSDARG00000008247	vezf1a	GO:0003676	nucleic acid binding	IEA
ENSDARG00000008372	spred2b	GO:0016020	membrane	IEA
ENSDARG00000008372	spred2b	GO:0007275	multicellular organism development	IEA
ENSDARG00000008372	spred2b	GO:0009966	regulation of signal transduction	IEA
ENSDARG00000008377	epn2	GO:0006897	endocytosis	IEA
ENSDARG00000008377	epn2	GO:0030128	clathrin coat of endocytic vesicle	IEA
ENSDARG00000008398	cacna1c	GO:0016020	membrane	IEA
ENSDARG00000008398	cacna1c	GO:0005216	ion channel activity	IEA
ENSDARG00000008398	cacna1c	GO:0006811	ion transport	IEA
ENSDARG00000008398	cacna1c	GO:0016021	integral component of membrane	IEA
ENSDARG00000008398	cacna1c	GO:0055085	transmembrane transport	IEA
ENSDARG00000008398	cacna1c	GO:0005886	plasma membrane	IBA
ENSDARG00000008398	cacna1c	GO:0005244	voltage-gated ion channel activity	IEA
ENSDARG00000008398	cacna1c	GO:0034765	regulation of ion transmembrane transport	IEA
ENSDARG00000008398	cacna1c	GO:0070588	calcium ion transmembrane transport	IEA
ENSDARG00000008398	cacna1c	GO:0003007	heart morphogenesis	IMP
ENSDARG00000008398	cacna1c	GO:0086010	membrane depolarization during action potential	IBA
ENSDARG00000008398	cacna1c	GO:0048701	embryonic cranial skeleton morphogenesis	IMP
ENSDARG00000008398	cacna1c	GO:0005245	voltage-gated calcium channel activity	IEA
ENSDARG00000008398	cacna1c	GO:0005262	calcium channel activity	IEA
ENSDARG00000008398	cacna1c	GO:0006816	calcium ion transport	IEA
ENSDARG00000008398	cacna1c	GO:0005891	voltage-gated calcium channel complex	IEA
ENSDARG00000008398	cacna1c	GO:0001947	heart looping	IMP
ENSDARG00000008398	cacna1c	GO:0008016	regulation of heart contraction	IMP
ENSDARG00000008398	cacna1c	GO:0005245	voltage-gated calcium channel activity	IDA
ENSDARG00000008398	cacna1c	GO:0005245	voltage-gated calcium channel activity	IMP
ENSDARG00000008398	cacna1c	GO:0001822	kidney development	IMP
ENSDARG00000008398	cacna1c	GO:0006816	calcium ion transport	IMP
ENSDARG00000008398	cacna1c	GO:0070509	calcium ion import	IMP
ENSDARG00000008398	cacna1c	GO:0005891	voltage-gated calcium channel complex	IC
ENSDARG00000008398	cacna1c	GO:0008331	high voltage-gated calcium channel activity	IBA
ENSDARG00000008398	cacna1c	GO:0003301	physiological cardiac muscle hypertrophy	IMP
ENSDARG00000008542	yod1	GO:0046872	metal ion binding	IEA
ENSDARG00000008542	yod1	GO:0005634	nucleus	IBA
ENSDARG00000008542	yod1	GO:0005737	cytoplasm	IEA
ENSDARG00000008542	yod1	GO:0005737	cytoplasm	ISS
ENSDARG00000008542	yod1	GO:0005829	cytosol	IBA
ENSDARG00000008542	yod1	GO:0016787	hydrolase activity	IEA
ENSDARG00000008542	yod1	GO:0008233	peptidase activity	IEA
ENSDARG00000008542	yod1	GO:0006508	proteolysis	IEA
ENSDARG00000008542	yod1	GO:0008234	cysteine-type peptidase activity	IEA
ENSDARG00000008542	yod1	GO:0004843	thiol-dependent ubiquitin-specific protease activity	ISS
ENSDARG00000008542	yod1	GO:0036459	thiol-dependent ubiquitinyl hydrolase activity	IEA
ENSDARG00000008542	yod1	GO:0071108	protein K48-linked deubiquitination	ISS
ENSDARG00000008542	yod1	GO:0004843	thiol-dependent ubiquitin-specific protease activity	IBA
ENSDARG00000008542	yod1	GO:0035523	protein K29-linked deubiquitination	ISS
ENSDARG00000008542	yod1	GO:0070536	protein K63-linked deubiquitination	ISS
ENSDARG00000008542	yod1	GO:1990168	protein K33-linked deubiquitination	ISS
ENSDARG00000008542	yod1	GO:0006986	response to unfolded protein	IEA
ENSDARG00000008542	yod1	GO:0035871	protein K11-linked deubiquitination	ISS
ENSDARG00000008542	yod1	GO:0030433	ubiquitin-dependent ERAD pathway	ISS
ENSDARG00000008542	yod1	GO:0030433	ubiquitin-dependent ERAD pathway	IBA
ENSDARG00000008542	yod1	GO:0030968	endoplasmic reticulum unfolded protein response	IBA
ENSDARG00000008542	yod1	GO:0016579	protein deubiquitination	IBA
ENSDARG00000008542	yod1	GO:0016236	macroautophagy	ISS
ENSDARG00000008542	yod1	GO:0030968	endoplasmic reticulum unfolded protein response	ISS
ENSDARG00000008542	yod1	GO:1990167	protein K27-linked deubiquitination	ISS
ENSDARG00000008542	yod1
ENSDARG00000008772	cacng1a	GO:0016020	membrane	IEA
ENSDARG00000008772	cacng1a	GO:0006810	transport	IEA
ENSDARG00000008772	cacng1a	GO:0006811	ion transport	IEA
ENSDARG00000008772	cacng1a	GO:0016021	integral component of membrane	IEA
ENSDARG00000008772	cacng1a	GO:0005244	voltage-gated ion channel activity	IEA
ENSDARG00000008772	cacng1a	GO:0034765	regulation of ion transmembrane transport	IEA
ENSDARG00000008772	cacng1a	GO:0070588	calcium ion transmembrane transport	IEA
ENSDARG00000008772	cacng1a	GO:0006816	calcium ion transport	IEA
ENSDARG00000008772	cacng1a	GO:0005245	voltage-gated calcium channel activity	IEA
ENSDARG00000008772	cacng1a	GO:0005262	calcium channel activity	IEA
ENSDARG00000008772	cacng1a	GO:0005891	voltage-gated calcium channel complex	IEA
ENSDARG00000008849	ptprq	GO:0016020	membrane	IEA
ENSDARG00000008849	ptprq	GO:0016021	integral component of membrane	IEA
ENSDARG00000008849	ptprq	GO:0004725	protein tyrosine phosphatase activity	IEA
ENSDARG00000008849	ptprq	GO:0006470	protein dephosphorylation	IEA
ENSDARG00000008849	ptprq	GO:0035335	peptidyl-tyrosine dephosphorylation	IEA
ENSDARG00000008849	ptprq	GO:0016791	phosphatase activity	IEA
ENSDARG00000008849	ptprq	GO:0016311	dephosphorylation	IEA
ENSDARG00000008849	ptprq
ENSDARG00000008886	msx1b	GO:0006355	regulation of transcription, DNA-templated	IEA
ENSDARG00000008886	msx1b	GO:0003677	DNA binding	IEA
ENSDARG00000008886	msx1b	GO:0005634	nucleus	IEA
ENSDARG00000008886	msx1b	GO:0007275	multicellular organism development	IEA
ENSDARG00000008886	msx1b	GO:0048703	embryonic viscerocranium morphogenesis	IGI
ENSDARG00000008886	msx1b	GO:0043565	sequence-specific DNA binding	IEA
ENSDARG00000008886	msx1b	GO:0009953	dorsal/ventral pattern formation	IDA
ENSDARG00000008886	msx1b	GO:0031101	fin regeneration	IMP
ENSDARG00000008886	msx1b	GO:0043049	otic placode formation	IGI
ENSDARG00000008886	msx1b	GO:0043523	regulation of neuron apoptotic process	IGI
ENSDARG00000008946	ccdc127b
ENSDARG00000009281	dnm1b	GO:0003924	GTPase activity	IEA
ENSDARG00000009281	dnm1b	GO:0005525	GTP binding	IEA
ENSDARG00000009281	dnm1b	GO:0000166	nucleotide binding	IEA
ENSDARG00000009281	dnm1b	GO:0003924	GTPase activity	IBA
ENSDARG00000009281	dnm1b	GO:0000266	mitochondrial fission	IBA
ENSDARG00000009281	dnm1b	GO:0008017	microtubule binding	IBA
ENSDARG00000009281	dnm1b	GO:0003374	dynamin family protein polymerization involved in mitochondrial fission	IBA
ENSDARG00000009281	dnm1b	GO:0061025	membrane fusion	IBA
ENSDARG00000009281	dnm1b	GO:0031966	mitochondrial membrane	IBA
ENSDARG00000009281	dnm1b	GO:0072583	clathrin-dependent endocytosis	IEA
ENSDARG00000009281	dnm1b
ENSDARG00000009401	vcanb	GO:0005509	calcium ion binding	IEA
ENSDARG00000009401	vcanb	GO:0007155	cell adhesion	IEA
ENSDARG00000009401	vcanb	GO:0005578	proteinaceous extracellular matrix	IBA
ENSDARG00000009401	vcanb	GO:0005201	extracellular matrix structural constituent	IBA
ENSDARG00000009401	vcanb	GO:0005540	hyaluronic acid binding	IEA
ENSDARG00000009401	vcanb	GO:0005540	hyaluronic acid binding	IBA
ENSDARG00000009401	vcanb	GO:0007417	central nervous system development	IBA
ENSDARG00000009401	vcanb	GO:0001501	skeletal system development	IMP
ENSDARG00000009401	vcanb	GO:0001957	intramembranous ossification	IMP
ENSDARG00000009466	rgs9bp	GO:0016020	membrane	IEA
ENSDARG00000009466	rgs9bp	GO:0016021	integral component of membrane	IEA
ENSDARG00000009626	nrbp2b	GO:0004672	protein kinase activity	IEA
ENSDARG00000009626	nrbp2b	GO:0004674	protein serine/threonine kinase activity	IBA
ENSDARG00000009626	nrbp2b	GO:0005524	ATP binding	IEA
ENSDARG00000009626	nrbp2b	GO:0006468	protein phosphorylation	IEA
ENSDARG00000009626	nrbp2b	GO:0005829	cytosol	IBA
ENSDARG00000009626	nrbp2b	GO:0006888	ER to Golgi vesicle-mediated transport	IBA
ENSDARG00000009626	nrbp2b	GO:0035556	intracellular signal transduction	IBA
ENSDARG00000009626	nrbp2b	GO:0006468	protein phosphorylation	IBA
ENSDARG00000009626	nrbp2b	GO:0012505	endomembrane system	IBA
ENSDARG00000009870	mapk8b	GO:0016740	transferase activity	IEA
ENSDARG00000009870	mapk8b	GO:0000166	nucleotide binding	IEA
ENSDARG00000009870	mapk8b	GO:0005524	ATP binding	IEA
ENSDARG00000009870	mapk8b	GO:0004672	protein kinase activity	IEA
ENSDARG00000009870	mapk8b	GO:0006468	protein phosphorylation	IEA
ENSDARG00000009870	mapk8b	GO:0005737	cytoplasm	IBA
ENSDARG00000009870	mapk8b	GO:0005634	nucleus	IBA
ENSDARG00000009870	mapk8b	GO:0016301	kinase activity	IEA
ENSDARG00000009870	mapk8b	GO:0016310	phosphorylation	IEA
ENSDARG00000009870	mapk8b	GO:0004674	protein serine/threonine kinase activity	IEA
ENSDARG00000009870	mapk8b	GO:0043005	neuron projection	IBA
ENSDARG00000009870	mapk8b	GO:0004707	MAP kinase activity	IEA
ENSDARG00000009870	mapk8b	GO:0048263	determination of dorsal identity	IMP
ENSDARG00000009870	mapk8b	GO:0010468	regulation of gene expression	IBA
ENSDARG00000009870	mapk8b	GO:0009612	response to mechanical stimulus	IBA
ENSDARG00000009870	mapk8b	GO:0048666	neuron development	IBA
ENSDARG00000009870	mapk8b	GO:0043065	positive regulation of apoptotic process	IBA
ENSDARG00000009870	mapk8b	GO:0071310	cellular response to organic substance	IBA
ENSDARG00000009870	mapk8b	GO:0048511	rhythmic process	IEA
ENSDARG00000009870	mapk8b	GO:0004705	JUN kinase activity	IBA
ENSDARG00000009870	mapk8b	GO:0007254	JNK cascade	ISS
ENSDARG00000009870	mapk8b	GO:0007254	JNK cascade	IMP
ENSDARG00000009870	mapk8b	GO:0007258	JUN phosphorylation	IEA
ENSDARG00000009870	mapk8b	GO:0005622	intracellular	IEA
ENSDARG00000009870	mapk8b	GO:0000165	MAPK cascade	IEA
ENSDARG00000009870	mapk8b	GO:0016020	membrane	IEA
ENSDARG00000009870	mapk8b	GO:0016021	integral component of membrane	IEA
ENSDARG00000009874	cyp2k31	GO:0016020	membrane	IEA
ENSDARG00000009874	cyp2k31	GO:0016021	integral component of membrane	IEA
ENSDARG00000009874	cyp2k31	GO:0046872	metal ion binding	IEA
ENSDARG00000009874	cyp2k31	GO:0055114	oxidation-reduction process	IEA
ENSDARG00000009874	cyp2k31	GO:0016491	oxidoreductase activity	IEA
ENSDARG00000009874	cyp2k31	GO:0005506	iron ion binding	IEA
ENSDARG00000009874	cyp2k31	GO:0020037	heme binding	IEA
ENSDARG00000009874	cyp2k31	GO:0016705	oxidoreductase activity, acting on paired donors, with incorporation or reduction of molecular oxygen	IEA
ENSDARG00000009874	cyp2k31	GO:0004497	monooxygenase activity	IEA
ENSDARG00000009874	cyp2k31	GO:0008395	steroid hydroxylase activity	IBA
ENSDARG00000009874	cyp2k31	GO:0008392	arachidonic acid epoxygenase activity	IBA
ENSDARG00000009874	cyp2k31	GO:0019373	epoxygenase P450 pathway	IBA
ENSDARG00000009941	erc1a	GO:0008150	biological_process	ND
ENSDARG00000009941	erc1a	GO:0003674	molecular_function	ND
ENSDARG00000009941	erc1a	GO:0048786	presynaptic active zone	IEA
ENSDARG00000010018	qki2
ENSDARG00000010018	qki2	GO:0006810	transport	IEA
ENSDARG00000010018	qki2	GO:0003676	nucleic acid binding	IEA
ENSDARG00000010018	qki2	GO:0003723	RNA binding	IEA
ENSDARG00000010018	qki2	GO:0005737	cytoplasm	IEA
ENSDARG00000010018	qki2	GO:0005634	nucleus	IEA
ENSDARG00000010018	qki2	GO:0007275	multicellular organism development	IEA
ENSDARG00000010018	qki2	GO:0030154	cell differentiation	IEA
ENSDARG00000010018	qki2	GO:0006417	regulation of translation	IEA
ENSDARG00000010018	qki2	GO:0006397	mRNA processing	IEA
ENSDARG00000010018	qki2	GO:0008380	RNA splicing	IEA
ENSDARG00000010018	qki2	GO:0051028	mRNA transport	IEA
ENSDARG00000010018	qki2	GO:0017124	SH3 domain binding	IEA
ENSDARG00000010181	asap2a	GO:0046872	metal ion binding	IEA
ENSDARG00000010181	asap2a	GO:0005096	GTPase activator activity	IEA
ENSDARG00000010181	asap2a	GO:0043547	positive regulation of GTPase activity	IEA
ENSDARG00000010270	fezf1	GO:0003676	nucleic acid binding	IEA
ENSDARG00000010270	fezf1	GO:0046872	metal ion binding	IEA
ENSDARG00000010270	fezf1	GO:0003677	DNA binding	IEA
ENSDARG00000010270	fezf1	GO:0005634	nucleus	IEA
ENSDARG00000010270	fezf1	GO:0007275	multicellular organism development	IEA
ENSDARG00000010270	fezf1	GO:0006351	transcription, DNA-templated	IEA
ENSDARG00000010270	fezf1	GO:0006355	regulation of transcription, DNA-templated	IEA
ENSDARG00000010270	fezf1	GO:0007399	nervous system development	IEA
ENSDARG00000010270	fezf1	GO:0030154	cell differentiation	IEA
ENSDARG00000010317	gpr183a	GO:0016020	membrane	IEA
ENSDARG00000010317	gpr183a	GO:0016021	integral component of membrane	IEA
ENSDARG00000010317	gpr183a	GO:0004871	signal transducer activity	IEA
ENSDARG00000010317	gpr183a	GO:0004930	G-protein coupled receptor activity	IEA
ENSDARG00000010317	gpr183a	GO:0007165	signal transduction	IEA
ENSDARG00000010317	gpr183a	GO:0007186	G-protein coupled receptor signaling pathway	IEA
ENSDARG00000010408	igsf9b	GO:0008150	biological_process	ND
ENSDARG00000010408	igsf9b	GO:0003674	molecular_function	ND
ENSDARG00000010454	guca1a	GO:0005509	calcium ion binding	IEA
ENSDARG00000010454	guca1a	GO:0031284	positive regulation of guanylate cyclase activity	IEA
ENSDARG00000010454	guca1a	GO:0005509	calcium ion binding	IDA
ENSDARG00000010454	guca1a	GO:0005509	calcium ion binding	ISS
ENSDARG00000010454	guca1a	GO:0008048	calcium sensitive guanylate cyclase activator activity	IDA
ENSDARG00000010454	guca1a	GO:0030250	guanylate cyclase activator activity	ISS
ENSDARG00000010515	dvl1a	GO:0005622	intracellular	IEA
ENSDARG00000010515	dvl1a	GO:0035556	intracellular signal transduction	IEA
ENSDARG00000010515	dvl1a	GO:0016055	Wnt signaling pathway	IEA
ENSDARG00000010515	dvl1a	GO:0005829	cytosol	IBA
ENSDARG00000010515	dvl1a	GO:0060070	canonical Wnt signaling pathway	IBA
ENSDARG00000010515	dvl1a	GO:0005109	frizzled binding	IBA
ENSDARG00000010515	dvl1a	GO:0090179	planar cell polarity pathway involved in neural tube closure	IBA
ENSDARG00000010764	flj13639
ENSDARG00000010977	rab34b	GO:0003924	GTPase activity	IEA
ENSDARG00000010977	rab34b	GO:0005525	GTP binding	IEA
ENSDARG00000010977	rab34b
ENSDARG00000011042	pgbd5
ENSDARG00000011208		GO:0004129	cytochrome-c oxidase activity	IEA
ENSDARG00000011208		GO:0005740	mitochondrial envelope	IEA
ENSDARG00000011208		GO:0004129	cytochrome-c oxidase activity	IBA
ENSDARG00000011208		GO:0006123	mitochondrial electron transport, cytochrome c to oxygen	IBA
ENSDARG00000011208		GO:0005751	mitochondrial respiratory chain complex IV	IBA
ENSDARG00000011208		GO:0042776	mitochondrial ATP synthesis coupled proton transport	IBA
ENSDARG00000011473	calcrla	GO:0016020	membrane	IEA
ENSDARG00000011473	calcrla	GO:0005886	plasma membrane	IEA
ENSDARG00000011473	calcrla	GO:0016021	integral component of membrane	IEA
ENSDARG00000011473	calcrla	GO:0004871	signal transducer activity	IEA
ENSDARG00000011473	calcrla	GO:0004930	G-protein coupled receptor activity	IEA
ENSDARG00000011473	calcrla	GO:0007165	signal transduction	IEA
ENSDARG00000011473	calcrla	GO:0007186	G-protein coupled receptor signaling pathway	IEA
ENSDARG00000011473	calcrla	GO:0004888	transmembrane signaling receptor activity	IEA
ENSDARG00000011473	calcrla	GO:0007166	cell surface receptor signaling pathway	IEA
ENSDARG00000011473	calcrla	GO:0004948	calcitonin receptor activity	IEA
ENSDARG00000011537	ugt2a5	GO:0016740	transferase activity	IEA
ENSDARG00000011537	ugt2a5	GO:0016020	membrane	IEA
ENSDARG00000011537	ugt2a5	GO:0016021	integral component of membrane	IEA
ENSDARG00000011537	ugt2a5	GO:0016757	transferase activity, transferring glycosyl groups	IEA
ENSDARG00000011537	ugt2a5	GO:0008152	metabolic process	IEA
ENSDARG00000011537	ugt2a5	GO:0043231	intracellular membrane-bounded organelle	IBA
ENSDARG00000011537	ugt2a5	GO:0016758	transferase activity, transferring hexosyl groups	IEA
ENSDARG00000011537	ugt2a5	GO:0015020	glucuronosyltransferase activity	IEA
ENSDARG00000011537	ugt2a5	GO:0015020	glucuronosyltransferase activity	IBA
ENSDARG00000011582	sox5	GO:0003677	DNA binding	IEA
ENSDARG00000011582	sox5	GO:0005634	nucleus	IEA
ENSDARG00000011600	epha4b
ENSDARG00000011600	epha4b	GO:0016740	transferase activity	IEA
ENSDARG00000011600	epha4b	GO:0016020	membrane	IEA
ENSDARG00000011600	epha4b	GO:0016021	integral component of membrane	IEA
ENSDARG00000011600	epha4b	GO:0000166	nucleotide binding	IEA
ENSDARG00000011600	epha4b	GO:0005524	ATP binding	IEA
ENSDARG00000011600	epha4b	GO:0004672	protein kinase activity	IEA
ENSDARG00000011600	epha4b	GO:0006468	protein phosphorylation	IEA
ENSDARG00000011600	epha4b	GO:0004713	protein tyrosine kinase activity	IEA
ENSDARG00000011600	epha4b	GO:0004714	transmembrane receptor protein tyrosine kinase activity	IEA
ENSDARG00000011600	epha4b	GO:0016301	kinase activity	IEA
ENSDARG00000011600	epha4b	GO:0007169	transmembrane receptor protein tyrosine kinase signaling pathway	IEA
ENSDARG00000011600	epha4b	GO:0016310	phosphorylation	IEA
ENSDARG00000011600	epha4b	GO:0018108	peptidyl-tyrosine phosphorylation	IEA
ENSDARG00000011600	epha4b	GO:0005887	integral component of plasma membrane	IEA
ENSDARG00000011600	epha4b	GO:0005003	ephrin receptor activity	IEA
ENSDARG00000011600	epha4b	GO:0048013	ephrin receptor signaling pathway	IEA
ENSDARG00000011600	epha4b	GO:0030517	negative regulation of axon extension	IGI
ENSDARG00000011600	epha4b	GO:0048685	negative regulation of collateral sprouting of intact axon in response to injury	IGI
ENSDARG00000011724	marveld1	GO:0016020	membrane	IEA
ENSDARG00000011724	marveld1	GO:0016021	integral component of membrane	IEA
ENSDARG00000011724	marveld1	GO:0005634	nucleus	IEA
ENSDARG00000011724	marveld1	GO:0016021	integral component of membrane	IBA
ENSDARG00000011724	marveld1	GO:0045121	membrane raft	IBA
ENSDARG00000011724	marveld1	GO:0019911	structural constituent of myelin sheath	IBA
ENSDARG00000011724	marveld1	GO:0001766	membrane raft polarization	IBA
ENSDARG00000011724	marveld1	GO:0008104	protein localization	IBA
ENSDARG00000011724	marveld1	GO:0042552	myelination	IBA
ENSDARG00000011801	wars2	GO:0000166	nucleotide binding	IEA
ENSDARG00000011801	wars2	GO:0005524	ATP binding	IEA
ENSDARG00000011801	wars2	GO:0005737	cytoplasm	IEA
ENSDARG00000011801	wars2	GO:0004812	aminoacyl-tRNA ligase activity	IEA
ENSDARG00000011801	wars2	GO:0016874	ligase activity	IEA
ENSDARG00000011801	wars2	GO:0006412	translation	IEA
ENSDARG00000011801	wars2	GO:0006418	tRNA aminoacylation for protein translation	IEA
ENSDARG00000011801	wars2	GO:0004830	tryptophan-tRNA ligase activity	IEA
ENSDARG00000011801	wars2	GO:0006436	tryptophanyl-tRNA aminoacylation	IEA
ENSDARG00000011973	slc35d1a	GO:0016020	membrane	IEA
ENSDARG00000011973	slc35d1a	GO:0016021	integral component of membrane	IEA
ENSDARG00000011973	slc35d1a	GO:0015165	pyrimidine nucleotide-sugar transmembrane transporter activity	IBA
ENSDARG00000011973	slc35d1a	GO:0090481	pyrimidine nucleotide-sugar transmembrane transport	IEA
ENSDARG00000012060	thbs3b	GO:0005576	extracellular region	IEA
ENSDARG00000012060	thbs3b	GO:0005509	calcium ion binding	IEA
ENSDARG00000012060	thbs3b	GO:0007155	cell adhesion	IEA
ENSDARG00000012060	thbs3b	GO:0008201	heparin binding	IEA
ENSDARG00000012060	thbs3b	GO:0031012	extracellular matrix	IEA
ENSDARG00000012060	thbs3b	GO:0030198	extracellular matrix organization	IEA
ENSDARG00000012071	angptl1a	GO:0001525	angiogenesis	IGI
ENSDARG00000012071	angptl1a	GO:0002244	hematopoietic progenitor cell differentiation	IGI
ENSDARG00000012071	angptl1a	GO:0060216	definitive hemopoiesis	IGI
ENSDARG00000012071	angptl1a	GO:0045747	positive regulation of Notch signaling pathway	IGI
ENSDARG00000012125	cnga1	GO:0016020	membrane	IEA
ENSDARG00000012125	cnga1	GO:0005216	ion channel activity	IEA
ENSDARG00000012125	cnga1	GO:0006810	transport	IEA
ENSDARG00000012125	cnga1	GO:0006811	ion transport	IEA
ENSDARG00000012125	cnga1	GO:0016021	integral component of membrane	IEA
ENSDARG00000012125	cnga1	GO:0007165	signal transduction	IEA
ENSDARG00000012125	cnga1	GO:0055085	transmembrane transport	IEA
ENSDARG00000012125	cnga1	GO:0005887	integral component of plasma membrane	IBA
ENSDARG00000012125	cnga1	GO:0005249	voltage-gated potassium channel activity	IBA
ENSDARG00000012125	cnga1	GO:0042391	regulation of membrane potential	IBA
ENSDARG00000012125	cnga1	GO:0071805	potassium ion transmembrane transport	IEA
ENSDARG00000012125	cnga1	GO:0007601	visual perception	IEA
ENSDARG00000012125	cnga1	GO:0098655	cation transmembrane transport	IEA
ENSDARG00000012125	cnga1	GO:0005221	intracellular cyclic nucleotide activated cation channel activity	IEA
ENSDARG00000012125	cnga1	GO:0034765	regulation of ion transmembrane transport	IEA
ENSDARG00000012126	zgc:109965	GO:0016020	membrane	IEA
ENSDARG00000012126	zgc:109965	GO:0016021	integral component of membrane	IEA
ENSDARG00000012126	zgc:109965	GO:0005789	endoplasmic reticulum membrane	IBA
ENSDARG00000012126	zgc:109965	GO:0009966	regulation of signal transduction	IEA
ENSDARG00000012126	zgc:109965	GO:0009966	regulation of signal transduction	IBA
ENSDARG00000012353	vipr2	GO:0016020	membrane	IEA
ENSDARG00000012353	vipr2	GO:0005886	plasma membrane	IEA
ENSDARG00000012353	vipr2	GO:0016021	integral component of membrane	IEA
ENSDARG00000012353	vipr2	GO:0004871	signal transducer activity	IEA
ENSDARG00000012353	vipr2	GO:0004930	G-protein coupled receptor activity	IEA
ENSDARG00000012353	vipr2	GO:0007165	signal transduction	IEA
ENSDARG00000012353	vipr2	GO:0007186	G-protein coupled receptor signaling pathway	IEA
ENSDARG00000012353	vipr2	GO:0004888	transmembrane signaling receptor activity	IEA
ENSDARG00000012353	vipr2	GO:0007166	cell surface receptor signaling pathway	IEA
ENSDARG00000012353	vipr2	GO:0004999	vasoactive intestinal polypeptide receptor activity	IEA
ENSDARG00000012353	vipr2	GO:0007188	adenylate cyclase-modulating G-protein coupled receptor signaling pathway	IDA
ENSDARG00000012366	fbp2	GO:0005829	cytosol	IBA
ENSDARG00000012366	fbp2	GO:0016787	hydrolase activity	IEA
ENSDARG00000012366	fbp2	GO:0005975	carbohydrate metabolic process	IEA
ENSDARG00000012366	fbp2	GO:0016791	phosphatase activity	IEA
ENSDARG00000012366	fbp2	GO:0016311	dephosphorylation	IEA
ENSDARG00000012366	fbp2	GO:0042578	phosphoric ester hydrolase activity	IEA
ENSDARG00000012366	fbp2	GO:0042132	fructose 1,6-bisphosphate 1-phosphatase activity	IEA
ENSDARG00000012366	fbp2	GO:0042132	fructose 1,6-bisphosphate 1-phosphatase activity	IBA
ENSDARG00000012366	fbp2	GO:0005986	sucrose biosynthetic process	IBA
ENSDARG00000012366	fbp2	GO:0006000	fructose metabolic process	IBA
ENSDARG00000012366	fbp2	GO:0006002	fructose 6-phosphate metabolic process	IBA
ENSDARG00000012366	fbp2	GO:0006094	gluconeogenesis	IBA
ENSDARG00000012366	fbp2	GO:0030388	fructose 1,6-bisphosphate metabolic process	IBA
ENSDARG00000012426	neflb	GO:0005198	structural molecule activity	IEA
ENSDARG00000012426	neflb	GO:0061564	axon development	IEA
ENSDARG00000012426	neflb	GO:0005882	intermediate filament	IEA
ENSDARG00000012426	neflb	GO:0005883	neurofilament	IEA
ENSDARG00000013000	ppfia2	GO:0045202	synapse	IEA
ENSDARG00000013000	ppfia2
ENSDARG00000013310	map3k15	GO:0016740	transferase activity	IEA
ENSDARG00000013310	map3k15	GO:0000166	nucleotide binding	IEA
ENSDARG00000013310	map3k15	GO:0005524	ATP binding	IEA
ENSDARG00000013310	map3k15	GO:0004672	protein kinase activity	IEA
ENSDARG00000013310	map3k15	GO:0006468	protein phosphorylation	IEA
ENSDARG00000013310	map3k15	GO:0016301	kinase activity	IEA
ENSDARG00000013310	map3k15	GO:0016310	phosphorylation	IEA
ENSDARG00000013310	map3k15	GO:0005622	intracellular	IEA
ENSDARG00000013310	map3k15	GO:0000165	MAPK cascade	IEA
ENSDARG00000013310	map3k15	GO:0004709	MAP kinase kinase kinase activity	IBA
ENSDARG00000013310	map3k15	GO:0000186	activation of MAPKK activity	IBA
ENSDARG00000013438	sycp3	GO:0003674	molecular_function	ND
ENSDARG00000013438	sycp3	GO:0051321	meiotic cell cycle	IBA
ENSDARG00000013438	sycp3	GO:0000800	lateral element	IBA
ENSDARG00000013461	supt7l
ENSDARG00000013596	brd1a	GO:0046872	metal ion binding	IEA
ENSDARG00000013667	tbck	GO:0004672	protein kinase activity	IEA
ENSDARG00000013667	tbck	GO:0005524	ATP binding	IEA
ENSDARG00000013667	tbck	GO:0006468	protein phosphorylation	IEA
ENSDARG00000013667	tbck	GO:0005622	intracellular	IBA
ENSDARG00000013667	tbck	GO:0005096	GTPase activator activity	IBA
ENSDARG00000013667	tbck	GO:0017137	Rab GTPase binding	IBA
ENSDARG00000013667	tbck	GO:0006886	intracellular protein transport	IBA
ENSDARG00000013667	tbck	GO:0031338	regulation of vesicle fusion	IBA
ENSDARG00000013667	tbck	GO:0090630	activation of GTPase activity	IBA
ENSDARG00000013667	tbck	GO:0012505	endomembrane system	IBA
ENSDARG00000013667	tbck
ENSDARG00000013834	arhgef3
ENSDARG00000013834	arhgef3	GO:0030097	hemopoiesis	IMP
ENSDARG00000013834	arhgef3	GO:0005622	intracellular	IEA
ENSDARG00000013834	arhgef3	GO:0035556	intracellular signal transduction	IEA
ENSDARG00000013834	arhgef3	GO:0005085	guanyl-nucleotide exchange factor activity	IEA
ENSDARG00000013834	arhgef3	GO:0005089	Rho guanyl-nucleotide exchange factor activity	IEA
ENSDARG00000013834	arhgef3	GO:0035023	regulation of Rho protein signal transduction	IEA
ENSDARG00000013834	arhgef3	GO:0065009	regulation of molecular function	IEA
ENSDARG00000013834	arhgef3	GO:0061515	myeloid cell development	IMP
ENSDARG00000014058	rab36	GO:0003924	GTPase activity	IEA
ENSDARG00000014058	rab36	GO:0005525	GTP binding	IEA
ENSDARG00000014083	wdr82	GO:0005634	nucleus	IEA
ENSDARG00000014083	wdr82	GO:0042800	histone methyltransferase activity (H3-K4 specific)	IBA
ENSDARG00000014083	wdr82	GO:0048188	Set1C/COMPASS complex	IBA
ENSDARG00000014083	wdr82	GO:0003682	chromatin binding	IBA
ENSDARG00000014083	wdr82	GO:0080182	histone H3-K4 trimethylation	IBA
ENSDARG00000014218	mecp2	GO:0005634	nucleus	IEA
ENSDARG00000014218	mecp2	GO:0003677	DNA binding	IEA
ENSDARG00000014218	mecp2	GO:0005634	nucleus	IBA
ENSDARG00000014218	mecp2	GO:0005829	cytosol	IBA
ENSDARG00000014218	mecp2	GO:0006351	transcription, DNA-templated	IEA
ENSDARG00000014218	mecp2	GO:0006355	regulation of transcription, DNA-templated	IEA
ENSDARG00000014218	mecp2	GO:0000122	negative regulation of transcription from RNA polymerase II promoter	IBA
ENSDARG00000014218	mecp2	GO:0007626	locomotory behavior	IMP
ENSDARG00000014218	mecp2	GO:0045664	regulation of neuron differentiation	IGI
ENSDARG00000014218	mecp2	GO:0045664	regulation of neuron differentiation	IMP
ENSDARG00000014218	mecp2	GO:0000122	negative regulation of transcription from RNA polymerase II promoter	IEA
ENSDARG00000014218	mecp2	GO:0009314	response to radiation	IBA
ENSDARG00000014218	mecp2	GO:0010385	double-stranded methylated DNA binding	IEA
ENSDARG00000014218	mecp2	GO:0008327	methyl-CpG binding	IBA
ENSDARG00000014218	mecp2	GO:0010385	double-stranded methylated DNA binding	IBA
ENSDARG00000014218	mecp2	GO:0000792	heterochromatin	IBA
ENSDARG00000014244	rbmx
ENSDARG00000014244	rbmx	GO:0003676	nucleic acid binding	IEA
ENSDARG00000014244	rbmx	GO:0003723	RNA binding	IEA
ENSDARG00000014244	rbmx	GO:0003723	RNA binding	ISS
ENSDARG00000014244	rbmx	GO:0005634	nucleus	IEA
ENSDARG00000014244	rbmx	GO:0005634	nucleus	ISS
ENSDARG00000014244	rbmx	GO:0007275	multicellular organism development	IEA
ENSDARG00000014244	rbmx	GO:0006351	transcription, DNA-templated	IEA
ENSDARG00000014244	rbmx	GO:0003682	chromatin binding	ISS
ENSDARG00000014244	rbmx	GO:0030529	intracellular ribonucleoprotein complex	IEA
ENSDARG00000014244	rbmx	GO:0006397	mRNA processing	IEA
ENSDARG00000014244	rbmx	GO:0008380	RNA splicing	IEA
ENSDARG00000014244	rbmx	GO:0005681	spliceosomal complex	IEA
ENSDARG00000014244	rbmx	GO:0003729	mRNA binding	ISS
ENSDARG00000014244	rbmx	GO:0070062	extracellular exosome	ISS
ENSDARG00000014244	rbmx	GO:0045944	positive regulation of transcription from RNA polymerase II promoter	ISS
ENSDARG00000014244	rbmx	GO:0051260	protein homooligomerization	ISS
ENSDARG00000014244	rbmx	GO:0000381	regulation of alternative mRNA splicing, via spliceosome	ISS
ENSDARG00000014244	rbmx	GO:0001047	core promoter binding	ISS
ENSDARG00000014244	rbmx	GO:0006366	transcription from RNA polymerase II promoter	ISS
ENSDARG00000014244	rbmx	GO:0006509	membrane protein ectodomain proteolysis	ISS
ENSDARG00000014244	rbmx	GO:0048025	negative regulation of mRNA splicing, via spliceosome	ISS
ENSDARG00000014244	rbmx	GO:0048026	positive regulation of mRNA splicing, via spliceosome	ISS
ENSDARG00000014244	rbmx	GO:0071347	cellular response to interleukin-1	ISS
ENSDARG00000014244	rbmx	GO:0005719	nuclear euchromatin	ISS
ENSDARG00000014244	rbmx	GO:0044530	supraspliceosomal complex	ISS
ENSDARG00000014244	rbmx	GO:0071013	catalytic step 2 spliceosome	ISS
ENSDARG00000014292	med15	GO:0006357	regulation of transcription from RNA polymerase II promoter	IEA
ENSDARG00000014292	med15	GO:0001104	RNA polymerase II transcription cofactor activity	IEA
ENSDARG00000014292	med15	GO:0016592	mediator complex	IEA
ENSDARG00000014292	med15
ENSDARG00000014954	snx33	GO:0016020	membrane	IEA
ENSDARG00000014954	snx33	GO:0006886	intracellular protein transport	IEA
ENSDARG00000014954	snx33	GO:0035091	phosphatidylinositol binding	IEA
ENSDARG00000014954	snx33	GO:0006897	endocytosis	IEA
ENSDARG00000014954	snx33	GO:0030659	cytoplasmic vesicle membrane	IEA
ENSDARG00000014954	snx33	GO:0031410	cytoplasmic vesicle	IEA
ENSDARG00000014954	snx33	GO:0015031	protein transport	IEA
ENSDARG00000014954	snx33	GO:0000278	mitotic cell cycle	IEA
ENSDARG00000014954	snx33	GO:0000281	mitotic cytokinesis	IEA
ENSDARG00000014954	snx33	GO:0031410	cytoplasmic vesicle	IBA
ENSDARG00000014954	snx33	GO:0005622	intracellular	IEA
ENSDARG00000014962	ppp3cca	GO:0016787	hydrolase activity	IEA
ENSDARG00000014962	ppp3cca	GO:0004721	phosphoprotein phosphatase activity	IEA
ENSDARG00000014962	ppp3cca	GO:0006470	protein dephosphorylation	IEA
ENSDARG00000014962	ppp3cca
ENSDARG00000014976	lims2	GO:0046872	metal ion binding	IEA
ENSDARG00000014976	lims2	GO:0005575	cellular_component	ND
ENSDARG00000014976	lims2	GO:0060047	heart contraction	IMP
ENSDARG00000014976	lims2	GO:0051896	regulation of protein kinase B signaling	IMP
ENSDARG00000015010	ccdc114	GO:0003674	molecular_function	ND
ENSDARG00000015010	ccdc114	GO:0003341	cilium movement	IBA
ENSDARG00000015010	ccdc114	GO:0036158	outer dynein arm assembly	IBA
ENSDARG00000015010	ccdc114	GO:0005930	axoneme	IDA
ENSDARG00000015010	ccdc114
ENSDARG00000015053	grip1	GO:0030159	receptor signaling complex scaffold activity	IEA
ENSDARG00000015053	grip1	GO:0016358	dendrite development	IEA
ENSDARG00000015053	grip1
ENSDARG00000015355	fosl1a	GO:0003700	transcription factor activity, sequence-specific DNA binding	IEA
ENSDARG00000015355	fosl1a	GO:0006355	regulation of transcription, DNA-templated	IEA
ENSDARG00000015355	fosl1a	GO:0003677	DNA binding	IEA
ENSDARG00000015355	fosl1a	GO:0006357	regulation of transcription from RNA polymerase II promoter	IEA
ENSDARG00000015355	fosl1a
ENSDARG00000015476	iqch
ENSDARG00000015552	phactr4a	GO:0003779	actin binding	IEA
ENSDARG00000015552	phactr4a	GO:0043086	negative regulation of catalytic activity	IEA
ENSDARG00000015552	phactr4a	GO:0004864	protein phosphatase inhibitor activity	IEA
ENSDARG00000015552	phactr4a
ENSDARG00000015554	zic2a	GO:0003676	nucleic acid binding	IEA
ENSDARG00000015554	zic2a	GO:0048703	embryonic viscerocranium morphogenesis	IMP
ENSDARG00000015554	zic2a	GO:0045892	negative regulation of transcription, DNA-templated	IMP
ENSDARG00000015554	zic2a	GO:0009953	dorsal/ventral pattern formation	IGI
ENSDARG00000015554	zic2a	GO:0009953	dorsal/ventral pattern formation	IMP
ENSDARG00000015554	zic2a	GO:0014032	neural crest cell development	IMP
ENSDARG00000015554	zic2a	GO:0030901	midbrain development	IGI
ENSDARG00000015554	zic2a	GO:0030901	midbrain development	IMP
ENSDARG00000015554	zic2a	GO:0030902	hindbrain development	IGI
ENSDARG00000015554	zic2a	GO:0001841	neural tube formation	IGI
ENSDARG00000015554	zic2a	GO:0060059	embryonic retina morphogenesis in camera-type eye	IMP
ENSDARG00000015554	zic2a	GO:0042127	regulation of cell proliferation	IMP
ENSDARG00000015554	zic2a	GO:0021536	diencephalon development	IGI
ENSDARG00000015554	zic2a	GO:0021536	diencephalon development	IMP
ENSDARG00000015554	zic2a	GO:0008589	regulation of smoothened signaling pathway	IMP
ENSDARG00000015554	zic2a	GO:0048385	regulation of retinoic acid receptor signaling pathway	IGI
ENSDARG00000015554	zic2a	GO:0033278	cell proliferation in midbrain	IMP
ENSDARG00000015554	zic2a	GO:0021846	cell proliferation in forebrain	IMP
ENSDARG00000015985	abcc9	GO:0016020	membrane	IEA
ENSDARG00000015985	abcc9	GO:0007165	signal transduction	IEA
ENSDARG00000015985	abcc9	GO:0016021	integral component of membrane	IEA
ENSDARG00000015985	abcc9	GO:0000166	nucleotide binding	IEA
ENSDARG00000015985	abcc9	GO:0005524	ATP binding	IEA
ENSDARG00000015985	abcc9	GO:0055085	transmembrane transport	IEA
ENSDARG00000015985	abcc9	GO:0016887	ATPase activity	IEA
ENSDARG00000015985	abcc9	GO:0071805	potassium ion transmembrane transport	IEA
ENSDARG00000015985	abcc9	GO:0006813	potassium ion transport	IEA
ENSDARG00000015985	abcc9	GO:0008281	sulfonylurea receptor activity	IEA
ENSDARG00000015985	abcc9	GO:0042626	ATPase activity, coupled to transmembrane movement of substances	IEA
ENSDARG00000015985	abcc9	GO:0008076	voltage-gated potassium channel complex	IBA
ENSDARG00000015985	abcc9	GO:0042493	response to drug	IBA
ENSDARG00000015985	abcc9	GO:0042383	sarcolemma	IBA
ENSDARG00000015985	abcc9	GO:0042626	ATPase activity, coupled to transmembrane movement of substances	IBA
ENSDARG00000015985	abcc9	GO:0005267	potassium channel activity	IBA
ENSDARG00000015985	abcc9	GO:0006813	potassium ion transport	IBA
ENSDARG00000015985	abcc9	GO:0008282	ATP-sensitive potassium channel complex	IBA
ENSDARG00000016531	klhl4
ENSDARG00000016532	suco
ENSDARG00000016651	znf106a	GO:0003676	nucleic acid binding	IEA
ENSDARG00000016651	znf106a	GO:0005829	cytosol	IBA
ENSDARG00000016651	znf106a	GO:0016020	membrane	IBA
ENSDARG00000016651	znf106a	GO:0017124	SH3 domain binding	IBA
ENSDARG00000016651	znf106a	GO:0008286	insulin receptor signaling pathway	IBA
ENSDARG00000016699	trpa1a	GO:0016020	membrane	IEA
ENSDARG00000016699	trpa1a	GO:0005216	ion channel activity	IEA
ENSDARG00000016699	trpa1a	GO:0006811	ion transport	IEA
ENSDARG00000016699	trpa1a	GO:0016021	integral component of membrane	IEA
ENSDARG00000016699	trpa1a	GO:0055085	transmembrane transport	IEA
ENSDARG00000016699	trpa1a	GO:0016021	integral component of membrane	ISS
ENSDARG00000016699	trpa1a	GO:0034220	ion transmembrane transport	IEA
ENSDARG00000016699	trpa1a	GO:0050974	detection of mechanical stimulus involved in sensory perception	IMP
ENSDARG00000016699	trpa1a	GO:0008381	mechanically-gated ion channel activity	IMP
ENSDARG00000016699	trpa1a	GO:0015276	ligand-gated ion channel activity	IDA
ENSDARG00000016699	trpa1a	GO:0034220	ion transmembrane transport	IDA
ENSDARG00000016699	trpa1a	GO:0009593	detection of chemical stimulus	IDA
ENSDARG00000016835	tcirg1a	GO:0006810	transport	IEA
ENSDARG00000016835	tcirg1a	GO:0006811	ion transport	IEA
ENSDARG00000016835	tcirg1a	GO:0016020	membrane	IEA
ENSDARG00000016835	tcirg1a	GO:0016021	integral component of membrane	IEA
ENSDARG00000016835	tcirg1a	GO:0015078	hydrogen ion transmembrane transporter activity	IEA
ENSDARG00000016835	tcirg1a	GO:0015992	proton transport	IEA
ENSDARG00000016835	tcirg1a	GO:0005886	plasma membrane	IBA
ENSDARG00000016835	tcirg1a	GO:0007035	vacuolar acidification	IBA
ENSDARG00000016835	tcirg1a	GO:0070072	vacuolar proton-transporting V-type ATPase complex assembly	IBA
ENSDARG00000016835	tcirg1a	GO:0015991	ATP hydrolysis coupled proton transport	IEA
ENSDARG00000016835	tcirg1a	GO:0000220	vacuolar proton-transporting V-type ATPase, V0 domain	IEA
ENSDARG00000016835	tcirg1a	GO:0033179	proton-transporting V-type ATPase, V0 domain	IEA
ENSDARG00000016835	tcirg1a	GO:0046961	proton-transporting ATPase activity, rotational mechanism	IBA
ENSDARG00000016835	tcirg1a	GO:0051117	ATPase binding	IBA
ENSDARG00000016835	tcirg1a	GO:0015986	ATP synthesis coupled proton transport	IBA
ENSDARG00000016835	tcirg1a	GO:0016471	vacuolar proton-transporting V-type ATPase complex	IBA
ENSDARG00000016981	bcar3	GO:0007165	signal transduction	IEA
ENSDARG00000016981	bcar3	GO:0007165	signal transduction	IBA
ENSDARG00000016981	bcar3	GO:0005622	intracellular	IEA
ENSDARG00000016981	bcar3	GO:0005085	guanyl-nucleotide exchange factor activity	IEA
ENSDARG00000016981	bcar3	GO:0005070	SH3/SH2 adaptor activity	IBA
ENSDARG00000016981	bcar3	GO:0009967	positive regulation of signal transduction	IEA
ENSDARG00000016981	bcar3	GO:0007264	small GTPase mediated signal transduction	IEA
ENSDARG00000016981	bcar3	GO:0065009	regulation of molecular function	IEA
ENSDARG00000017038	zgc:152670	GO:0016491	oxidoreductase activity	IEA
ENSDARG00000017038	zgc:152670	GO:0055114	oxidation-reduction process	IEA
ENSDARG00000017038	zgc:152670	GO:0005506	iron ion binding	IEA
ENSDARG00000017038	zgc:152670	GO:0016705	oxidoreductase activity, acting on paired donors, with incorporation or reduction of molecular oxygen	IEA
ENSDARG00000017038	zgc:152670	GO:0005783	endoplasmic reticulum	IEA
ENSDARG00000017038	zgc:152670	GO:0031418	L-ascorbic acid binding	IEA
ENSDARG00000017038	zgc:152670	GO:0016702	oxidoreductase activity, acting on single donors with incorporation of molecular oxygen, incorporation of two atoms of oxygen	IEA
ENSDARG00000017038	zgc:152670	GO:0004656	procollagen-proline 4-dioxygenase activity	IEA
ENSDARG00000017038	zgc:152670	GO:0019511	peptidyl-proline hydroxylation	IEA
ENSDARG00000017038	zgc:152670
ENSDARG00000017107	nr2e1	GO:0003700	transcription factor activity, sequence-specific DNA binding	IEA
ENSDARG00000017107	nr2e1	GO:0006355	regulation of transcription, DNA-templated	IEA
ENSDARG00000017107	nr2e1	GO:0005634	nucleus	IEA
ENSDARG00000017107	nr2e1	GO:0003677	DNA binding	IEA
ENSDARG00000017107	nr2e1	GO:0046872	metal ion binding	IEA
ENSDARG00000017107	nr2e1	GO:0008270	zinc ion binding	IEA
ENSDARG00000017107	nr2e1	GO:0003707	steroid hormone receptor activity	IEA
ENSDARG00000017107	nr2e1	GO:0043565	sequence-specific DNA binding	IEA
ENSDARG00000017107	nr2e1	GO:0006351	transcription, DNA-templated	IEA
ENSDARG00000017107	nr2e1	GO:0043401	steroid hormone mediated signaling pathway	IEA
ENSDARG00000017155	wnt10a	GO:0005576	extracellular region	IEA
ENSDARG00000017155	wnt10a	GO:0007275	multicellular organism development	IEA
ENSDARG00000017155	wnt10a	GO:0016055	Wnt signaling pathway	IEA
ENSDARG00000017155	wnt10a	GO:0005578	proteinaceous extracellular matrix	IEA
ENSDARG00000017155	wnt10a	GO:0005102	receptor binding	IEA
ENSDARG00000017329	cdkl1	GO:0000166	nucleotide binding	IEA
ENSDARG00000017329	cdkl1	GO:0005524	ATP binding	IEA
ENSDARG00000017329	cdkl1	GO:0004672	protein kinase activity	IEA
ENSDARG00000017329	cdkl1	GO:0006468	protein phosphorylation	IEA
ENSDARG00000017329	cdkl1	GO:0004674	protein serine/threonine kinase activity	IEA
ENSDARG00000017354	epha2a	GO:0016740	transferase activity	IEA
ENSDARG00000017354	epha2a	GO:0016020	membrane	IEA
ENSDARG00000017354	epha2a	GO:0016021	integral component of membrane	IEA
ENSDARG00000017354	epha2a	GO:0000166	nucleotide binding	IEA
ENSDARG00000017354	epha2a	GO:0005524	ATP binding	IEA
ENSDARG00000017354	epha2a	GO:0004672	protein kinase activity	IEA
ENSDARG00000017354	epha2a	GO:0006468	protein phosphorylation	IEA
ENSDARG00000017354	epha2a	GO:0004713	protein tyrosine kinase activity	IEA
ENSDARG00000017354	epha2a	GO:0016301	kinase activity	IEA
ENSDARG00000017354	epha2a	GO:0007169	transmembrane receptor protein tyrosine kinase signaling pathway	IEA
ENSDARG00000017354	epha2a	GO:0016310	phosphorylation	IEA
ENSDARG00000017354	epha2a	GO:0018108	peptidyl-tyrosine phosphorylation	IEA
ENSDARG00000017354	epha2a	GO:0005887	integral component of plasma membrane	IEA
ENSDARG00000017354	epha2a	GO:0005003	ephrin receptor activity	IEA
ENSDARG00000017354	epha2a	GO:0048013	ephrin receptor signaling pathway	IEA
ENSDARG00000017354	epha2a
ENSDARG00000017369	sema3d
ENSDARG00000017400	klf1	GO:0003676	nucleic acid binding	IEA
ENSDARG00000017400	klf1	GO:0005634	nucleus	IC
ENSDARG00000017400	klf1	GO:0006355	regulation of transcription, DNA-templated	IEA
ENSDARG00000017400	klf1	GO:0060319	primitive erythrocyte differentiation	IEP
ENSDARG00000017400	klf1	GO:0003700	transcription factor activity, sequence-specific DNA binding	IDA
ENSDARG00000017400	klf1	GO:0043565	sequence-specific DNA binding	IDA
ENSDARG00000017400	klf1	GO:0010628	positive regulation of gene expression	IDA
ENSDARG00000017400	klf1	GO:0010628	positive regulation of gene expression	IMP
ENSDARG00000017617	alg6	GO:0016740	transferase activity	IEA
ENSDARG00000017617	alg6	GO:0016020	membrane	IEA
ENSDARG00000017617	alg6	GO:0016021	integral component of membrane	IEA
ENSDARG00000017617	alg6	GO:0016757	transferase activity, transferring glycosyl groups	IEA
ENSDARG00000017617	alg6	GO:0005783	endoplasmic reticulum	IEA
ENSDARG00000017617	alg6	GO:0005789	endoplasmic reticulum membrane	IEA
ENSDARG00000017617	alg6	GO:0006486	protein glycosylation	IEA
ENSDARG00000017617	alg6	GO:0016758	transferase activity, transferring hexosyl groups	IEA
ENSDARG00000017673	nova2	GO:0003676	nucleic acid binding	IEA
ENSDARG00000017673	nova2	GO:0003723	RNA binding	IEA
ENSDARG00000017673	nova2	GO:0000398	mRNA splicing, via spliceosome	IEA
ENSDARG00000017673	nova2
ENSDARG00000017739	ak5l	GO:0016740	transferase activity	IEA
ENSDARG00000017739	ak5l	GO:0005524	ATP binding	IEA
ENSDARG00000017739	ak5l	GO:0016301	kinase activity	IEA
ENSDARG00000017739	ak5l	GO:0016310	phosphorylation	IEA
ENSDARG00000017739	ak5l	GO:0005575	cellular_component	ND
ENSDARG00000017739	ak5l	GO:0019205	nucleobase-containing compound kinase activity	IEA
ENSDARG00000017739	ak5l	GO:0006139	nucleobase-containing compound metabolic process	IEA
ENSDARG00000017773	slc16a12a	GO:0016020	membrane	IEA
ENSDARG00000017773	slc16a12a	GO:0016021	integral component of membrane	IEA
ENSDARG00000017773	slc16a12a	GO:0055085	transmembrane transport	IEA
ENSDARG00000017773	slc16a12a	GO:0005887	integral component of plasma membrane	IBA
ENSDARG00000017773	slc16a12a	GO:0008028	monocarboxylic acid transmembrane transporter activity	IBA
ENSDARG00000017773	slc16a12a	GO:0015718	monocarboxylic acid transport	IBA
ENSDARG00000017884	bgna	GO:0005737	cytoplasm	IBA
ENSDARG00000017884	bgna	GO:0004860	protein kinase inhibitor activity	IBA
ENSDARG00000017884	bgna	GO:0006469	negative regulation of protein kinase activity	IBA
ENSDARG00000017884	bgna	GO:0019221	cytokine-mediated signaling pathway	IBA
ENSDARG00000017884	bgna	GO:0046426	negative regulation of JAK-STAT cascade	IBA
ENSDARG00000017884	bgna	GO:0005578	proteinaceous extracellular matrix	IEA
ENSDARG00000017988	dse	GO:0016020	membrane	IEA
ENSDARG00000017988	dse	GO:0016021	integral component of membrane	IEA
ENSDARG00000018327	illr3	GO:0016020	membrane	IEA
ENSDARG00000018327	illr3	GO:0016021	integral component of membrane	IEA
ENSDARG00000018327	illr3	GO:0030246	carbohydrate binding	IEA
ENSDARG00000018327	illr3	GO:0045954	positive regulation of natural killer cell mediated cytotoxicity	IDA
ENSDARG00000018399	rps6kb1a	GO:0016740	transferase activity	IEA
ENSDARG00000018399	rps6kb1a	GO:0000166	nucleotide binding	IEA
ENSDARG00000018399	rps6kb1a	GO:0005524	ATP binding	IEA
ENSDARG00000018399	rps6kb1a	GO:0007165	signal transduction	IEA
ENSDARG00000018399	rps6kb1a	GO:0004672	protein kinase activity	IEA
ENSDARG00000018399	rps6kb1a	GO:0004674	protein serine/threonine kinase activity	IEA
ENSDARG00000018399	rps6kb1a	GO:0006468	protein phosphorylation	IEA
ENSDARG00000018399	rps6kb1a	GO:0016301	kinase activity	IEA
ENSDARG00000018399	rps6kb1a	GO:0016310	phosphorylation	IEA
ENSDARG00000018521	or115-1	GO:0005886	plasma membrane	IEA
ENSDARG00000018521	or115-1	GO:0016020	membrane	IEA
ENSDARG00000018521	or115-1	GO:0016021	integral component of membrane	IEA
ENSDARG00000018521	or115-1	GO:0004871	signal transducer activity	IEA
ENSDARG00000018521	or115-1	GO:0004930	G-protein coupled receptor activity	IEA
ENSDARG00000018521	or115-1	GO:0007165	signal transduction	IEA
ENSDARG00000018521	or115-1	GO:0007186	G-protein coupled receptor signaling pathway	IEA
ENSDARG00000018521	or115-1	GO:0007186	G-protein coupled receptor signaling pathway	IBA
ENSDARG00000018521	or115-1	GO:0016021	integral component of membrane	IBA
ENSDARG00000018521	or115-1	GO:0004984	olfactory receptor activity	IEA
ENSDARG00000018521	or115-1	GO:0007608	sensory perception of smell	IEA
ENSDARG00000018521	or115-1	GO:0050896	response to stimulus	IEA
ENSDARG00000018521	or115-1	GO:0050911	detection of chemical stimulus involved in sensory perception of smell	IEA
ENSDARG00000018521	or115-1	GO:0004888	transmembrane signaling receptor activity	IBA
ENSDARG00000018521	or115-1	GO:0050907	detection of chemical stimulus involved in sensory perception	IBA
ENSDARG00000018534	slc6a9	GO:0016020	membrane	IEA
ENSDARG00000018534	slc6a9	GO:0006810	transport	IEA
ENSDARG00000018534	slc6a9	GO:0016021	integral component of membrane	IEA
ENSDARG00000018534	slc6a9	GO:0005887	integral component of plasma membrane	IBA
ENSDARG00000018534	slc6a9	GO:0005328	neurotransmitter:sodium symporter activity	IEA
ENSDARG00000018534	slc6a9	GO:0015293	symporter activity	IEA
ENSDARG00000018534	slc6a9	GO:0006836	neurotransmitter transport	IEA
ENSDARG00000018534	slc6a9	GO:0005887	integral component of plasma membrane	IEA
ENSDARG00000018534	slc6a9	GO:0055085	transmembrane transport	IEA
ENSDARG00000018534	slc6a9	GO:0003333	amino acid transmembrane transport	IEA
ENSDARG00000018534	slc6a9	GO:0098794	postsynapse	IEA
ENSDARG00000018534	slc6a9	GO:0007626	locomotory behavior	IMP
ENSDARG00000018534	slc6a9	GO:0005283	sodium:amino acid symporter activity	IEA
ENSDARG00000018534	slc6a9	GO:0015187	glycine transmembrane transporter activity	IDA
ENSDARG00000018534	slc6a9	GO:0015816	glycine transport	IMP
ENSDARG00000018534	slc6a9	GO:0060080	inhibitory postsynaptic potential	IMP
ENSDARG00000018534	slc6a9	GO:0060092	regulation of synaptic transmission, glycinergic	IMP
ENSDARG00000018534	slc6a9	GO:1903825	organic acid transmembrane transport	IEA
ENSDARG00000018566	flnca	GO:0003779	actin binding	IEA
ENSDARG00000018566	flnca	GO:0005623	cell	IEA
ENSDARG00000018566	flnca	GO:0007626	locomotory behavior	IMP
ENSDARG00000018566	flnca	GO:0046716	muscle cell cellular homeostasis	IGI
ENSDARG00000018566	flnca	GO:0046716	muscle cell cellular homeostasis	IMP
ENSDARG00000018726	slco3a1	GO:0016020	membrane	IEA
ENSDARG00000018726	slco3a1	GO:0006810	transport	IEA
ENSDARG00000018726	slco3a1	GO:0006811	ion transport	IEA
ENSDARG00000018726	slco3a1	GO:0005886	plasma membrane	IEA
ENSDARG00000018726	slco3a1	GO:0016021	integral component of membrane	IEA
ENSDARG00000018726	slco3a1	GO:0055085	transmembrane transport	IEA
ENSDARG00000018726	slco3a1	GO:0005887	integral component of plasma membrane	IBA
ENSDARG00000018726	slco3a1	GO:0005215	transporter activity	IEA
ENSDARG00000018726	slco3a1	GO:0015347	sodium-independent organic anion transmembrane transporter activity	IBA
ENSDARG00000018726	slco3a1	GO:0043252	sodium-independent organic anion transport	IBA
ENSDARG00000018726	slco3a1	GO:0015732	prostaglandin transport	IBA
ENSDARG00000018726	slco3a1
ENSDARG00000018750	npr1b	GO:0016020	membrane	IEA
ENSDARG00000018750	npr1b	GO:0016021	integral component of membrane	IEA
ENSDARG00000018750	npr1b	GO:0000166	nucleotide binding	IEA
ENSDARG00000018750	npr1b	GO:0004672	protein kinase activity	IEA
ENSDARG00000018750	npr1b	GO:0005524	ATP binding	IEA
ENSDARG00000018750	npr1b	GO:0006468	protein phosphorylation	IEA
ENSDARG00000018750	npr1b	GO:0005622	intracellular	IEA
ENSDARG00000018750	npr1b	GO:0035556	intracellular signal transduction	IEA
ENSDARG00000018750	npr1b	GO:0004383	guanylate cyclase activity	IEA
ENSDARG00000018750	npr1b	GO:0016829	lyase activity	IEA
ENSDARG00000018750	npr1b	GO:0016849	phosphorus-oxygen lyase activity	IEA
ENSDARG00000018750	npr1b	GO:0006182	cGMP biosynthetic process	IEA
ENSDARG00000018750	npr1b	GO:0009190	cyclic nucleotide biosynthetic process	IEA
ENSDARG00000018750	npr1b	GO:0004383	guanylate cyclase activity	IBA
ENSDARG00000018750	npr1b	GO:0016941	natriuretic peptide receptor activity	IBA
ENSDARG00000018750	npr1b	GO:0006182	cGMP biosynthetic process	IBA
ENSDARG00000018750	npr1b	GO:0007168	receptor guanylyl cyclase signaling pathway	IBA
ENSDARG00000018750	npr1b	GO:0005886	plasma membrane	IBA
ENSDARG00000018750	npr1b	GO:0008074	guanylate cyclase complex, soluble	IBA
ENSDARG00000018765	pknox1.1	GO:0006355	regulation of transcription, DNA-templated	IEA
ENSDARG00000018765	pknox1.1	GO:0003677	DNA binding	IEA
ENSDARG00000018765	pknox1.1	GO:0005737	cytoplasm	IDA
ENSDARG00000018765	pknox1.1	GO:0005634	nucleus	IEA
ENSDARG00000018765	pknox1.1	GO:0005634	nucleus	IDA
ENSDARG00000018765	pknox1.1	GO:0030902	hindbrain development	IMP
ENSDARG00000018765	pknox1.1	GO:0043565	sequence-specific DNA binding	IDA
ENSDARG00000018765	pknox1.1	GO:0014033	neural crest cell differentiation	IMP
ENSDARG00000018765	pknox1.1	GO:0031060	regulation of histone methylation	IGI
ENSDARG00000018765	pknox1.1	GO:0031061	negative regulation of histone methylation	IGI
ENSDARG00000018765	pknox1.1	GO:0035066	positive regulation of histone acetylation	IGI
ENSDARG00000018825	tmem248	GO:0016020	membrane	IEA
ENSDARG00000018825	tmem248	GO:0016021	integral component of membrane	IEA
ENSDARG00000019117	parvb	GO:0003779	actin binding	IEA
ENSDARG00000019117	parvb	GO:0030018	Z disc	IDA
ENSDARG00000019117	parvb	GO:0007155	cell adhesion	IEA
ENSDARG00000019117	parvb	GO:0008016	regulation of heart contraction	IMP
ENSDARG00000019117	parvb	GO:0007160	cell-matrix adhesion	IMP
ENSDARG00000019117	parvb	GO:0031532	actin cytoskeleton reorganization	IEA
ENSDARG00000019128	tpm4b	GO:0051015	actin filament binding	IBA
ENSDARG00000019128	tpm4b	GO:0008307	structural constituent of muscle	IBA
ENSDARG00000019128	tpm4b	GO:0007015	actin filament organization	IBA
ENSDARG00000019128	tpm4b	GO:0005884	actin filament	IBA
ENSDARG00000019128	tpm4b	GO:0006936	muscle contraction	IBA
ENSDARG00000019128	tpm4b	GO:0005862	muscle thin filament tropomyosin	IBA
ENSDARG00000019128	tpm4b
ENSDARG00000019585	gstk2	GO:0055114	oxidation-reduction process	IEA
ENSDARG00000019585	gstk2	GO:0015035	protein disulfide oxidoreductase activity	IEA
ENSDARG00000019585	gstk2	GO:0016740	transferase activity	IEA
ENSDARG00000019585	gstk2	GO:0004364	glutathione transferase activity	IEA
ENSDARG00000020122	endou2	GO:0090502	RNA phosphodiester bond hydrolysis, endonucleolytic	IEA
ENSDARG00000020122	endou2	GO:0004521	endoribonuclease activity	IEA
ENSDARG00000020122	endou2
ENSDARG00000020149	acoxl	GO:0008152	metabolic process	IEA
ENSDARG00000020149	acoxl	GO:0071949	FAD binding	IEA
ENSDARG00000020149	acoxl	GO:0055114	oxidation-reduction process	IEA
ENSDARG00000020149	acoxl	GO:0006635	fatty acid beta-oxidation	IEA
ENSDARG00000020149	acoxl	GO:0005777	peroxisome	IEA
ENSDARG00000020149	acoxl	GO:0050660	flavin adenine dinucleotide binding	IEA
ENSDARG00000020149	acoxl	GO:0050660	flavin adenine dinucleotide binding	IBA
ENSDARG00000020149	acoxl	GO:0033539	fatty acid beta-oxidation using acyl-CoA dehydrogenase	IBA
ENSDARG00000020149	acoxl	GO:0016627	oxidoreductase activity, acting on the CH-CH group of donors	IEA
ENSDARG00000020149	acoxl	GO:0006631	fatty acid metabolic process	IEA
ENSDARG00000020149	acoxl	GO:0003997	acyl-CoA oxidase activity	IEA
ENSDARG00000020149	acoxl	GO:0003995	acyl-CoA dehydrogenase activity	IBA
ENSDARG00000020242	fermt2	GO:0005886	plasma membrane	IEA
ENSDARG00000020242	fermt2	GO:0016020	membrane	IEA
ENSDARG00000020242	fermt2	GO:0030054	cell junction	IEA
ENSDARG00000020242	fermt2	GO:0005737	cytoplasm	IEA
ENSDARG00000020242	fermt2	GO:0005856	cytoskeleton	IEA
ENSDARG00000020242	fermt2	GO:0005634	nucleus	IEA
ENSDARG00000020242	fermt2	GO:0007155	cell adhesion	IEA
ENSDARG00000020242	fermt2	GO:0016055	Wnt signaling pathway	IEA
ENSDARG00000020242	fermt2	GO:0042995	cell projection	IEA
ENSDARG00000020242	fermt2	GO:0001525	angiogenesis	IMP
ENSDARG00000020242	fermt2	GO:0014704	intercalated disc	IMP
ENSDARG00000020242	fermt2	GO:0008289	lipid binding	IEA
ENSDARG00000020242	fermt2	GO:0007010	cytoskeleton organization	IMP
ENSDARG00000020242	fermt2	GO:0055008	cardiac muscle tissue morphogenesis	IMP
ENSDARG00000020242	fermt2	GO:0016477	cell migration	IGI
ENSDARG00000020242	fermt2	GO:0008360	regulation of cell shape	IEA
ENSDARG00000020242	fermt2	GO:0031258	lamellipodium membrane	IEA
ENSDARG00000020242	fermt2	GO:0031674	I band	IEA
ENSDARG00000020242	fermt2	GO:0009986	cell surface	IEA
ENSDARG00000020242	fermt2	GO:0005925	focal adhesion	IEA
ENSDARG00000020242	fermt2	GO:0005938	cell cortex	IEA
ENSDARG00000020242	fermt2
ENSDARG00000020250	rhoj	GO:0003924	GTPase activity	IEA
ENSDARG00000020250	rhoj	GO:0005525	GTP binding	IEA
ENSDARG00000020250	rhoj	GO:0005622	intracellular	IEA
ENSDARG00000020250	rhoj	GO:0016020	membrane	IEA
ENSDARG00000020250	rhoj	GO:0000166	nucleotide binding	IEA
ENSDARG00000020250	rhoj	GO:0007264	small GTPase mediated signal transduction	IEA
ENSDARG00000020509	srd5a1	GO:0016020	membrane	IEA
ENSDARG00000020509	srd5a1	GO:0016021	integral component of membrane	IEA
ENSDARG00000020509	srd5a1	GO:0006629	lipid metabolic process	IEA
ENSDARG00000020509	srd5a1	GO:0055114	oxidation-reduction process	IEA
ENSDARG00000020509	srd5a1	GO:0005737	cytoplasm	IEA
ENSDARG00000020509	srd5a1	GO:0016627	oxidoreductase activity, acting on the CH-CH group of donors	IEA
ENSDARG00000020509	srd5a1	GO:0003865	3-oxo-5-alpha-steroid 4-dehydrogenase activity	IEA
ENSDARG00000020509	srd5a1	GO:0008202	steroid metabolic process	IEA
ENSDARG00000020509	srd5a1	GO:0003865	3-oxo-5-alpha-steroid 4-dehydrogenase activity	IBA
ENSDARG00000020509	srd5a1	GO:0006694	steroid biosynthetic process	IBA
ENSDARG00000020509	srd5a1
ENSDARG00000020758	tmem178	GO:0016020	membrane	IEA
ENSDARG00000020758	tmem178	GO:0016021	integral component of membrane	IEA
ENSDARG00000020890	tmod4	GO:0051015	actin filament binding	IEA
ENSDARG00000020890	tmod4	GO:0007015	actin filament organization	IBA
ENSDARG00000020890	tmod4	GO:0014866	skeletal myofibril assembly	IMP
ENSDARG00000020890	tmod4	GO:0005523	tropomyosin binding	IEA
ENSDARG00000020890	tmod4	GO:0005523	tropomyosin binding	IBA
ENSDARG00000020890	tmod4	GO:0006936	muscle contraction	IBA
ENSDARG00000020890	tmod4	GO:0051694	pointed-end actin filament capping	IEA
ENSDARG00000020890	tmod4	GO:0005865	striated muscle thin filament	IBA
ENSDARG00000021150	valopa	GO:0016020	membrane	IEA
ENSDARG00000021150	valopa	GO:0016021	integral component of membrane	IEA
ENSDARG00000021150	valopa	GO:0004871	signal transducer activity	IEA
ENSDARG00000021150	valopa	GO:0004930	G-protein coupled receptor activity	IEA
ENSDARG00000021150	valopa	GO:0007165	signal transduction	IEA
ENSDARG00000021150	valopa	GO:0007186	G-protein coupled receptor signaling pathway	IEA
ENSDARG00000021150	valopa	GO:0008020	G-protein coupled photoreceptor activity	IBA
ENSDARG00000021150	valopa	GO:0009584	detection of visible light	IEA
ENSDARG00000021150	valopa	GO:0001750	photoreceptor outer segment	IBA
ENSDARG00000021150	valopa	GO:0050896	response to stimulus	IEA
ENSDARG00000021150	valopa	GO:0007601	visual perception	IEA
ENSDARG00000021150	valopa	GO:0007602	phototransduction	IEA
ENSDARG00000021150	valopa	GO:0009881	photoreceptor activity	IEA
ENSDARG00000021150	valopa	GO:0018298	protein-chromophore linkage	IEA
ENSDARG00000021151	ptpreb	GO:0016020	membrane	IEA
ENSDARG00000021151	ptpreb	GO:0016021	integral component of membrane	IEA
ENSDARG00000021151	ptpreb	GO:0016787	hydrolase activity	IEA
ENSDARG00000021151	ptpreb	GO:0004725	protein tyrosine phosphatase activity	IEA
ENSDARG00000021151	ptpreb	GO:0006470	protein dephosphorylation	IEA
ENSDARG00000021151	ptpreb	GO:0035335	peptidyl-tyrosine dephosphorylation	IEA
ENSDARG00000021151	ptpreb	GO:0016791	phosphatase activity	IEA
ENSDARG00000021151	ptpreb	GO:0016311	dephosphorylation	IEA
ENSDARG00000021151	ptpreb	GO:0004721	phosphoprotein phosphatase activity	IEA
ENSDARG00000021151	ptpreb	GO:0060027	convergent extension involved in gastrulation	IGI
ENSDARG00000021154	zgc:92040	GO:0016491	oxidoreductase activity	IEA
ENSDARG00000021154	zgc:92040	GO:0055114	oxidation-reduction process	IEA
ENSDARG00000021154	zgc:92040	GO:0005739	mitochondrion	IBA
ENSDARG00000021154	zgc:92040	GO:0004657	proline dehydrogenase activity	IEA
ENSDARG00000021154	zgc:92040	GO:0004657	proline dehydrogenase activity	IBA
ENSDARG00000021154	zgc:92040	GO:0071949	FAD binding	IBA
ENSDARG00000021154	zgc:92040	GO:0006560	proline metabolic process	IEA
ENSDARG00000021154	zgc:92040	GO:0006562	proline catabolic process	IEA
ENSDARG00000021154	zgc:92040	GO:0010133	proline catabolic process to glutamate	IBA
ENSDARG00000021688	mxa	GO:0003924	GTPase activity	IEA
ENSDARG00000021688	mxa	GO:0005525	GTP binding	IEA
ENSDARG00000021688	mxa	GO:0000166	nucleotide binding	IEA
ENSDARG00000021735	cacna1ba	GO:0016020	membrane	IEA
ENSDARG00000021735	cacna1ba	GO:0005216	ion channel activity	IEA
ENSDARG00000021735	cacna1ba	GO:0006811	ion transport	IEA
ENSDARG00000021735	cacna1ba	GO:0016021	integral component of membrane	IEA
ENSDARG00000021735	cacna1ba	GO:0055085	transmembrane transport	IEA
ENSDARG00000021735	cacna1ba	GO:0005886	plasma membrane	IBA
ENSDARG00000021735	cacna1ba	GO:0005244	voltage-gated ion channel activity	IEA
ENSDARG00000021735	cacna1ba	GO:0034765	regulation of ion transmembrane transport	IEA
ENSDARG00000021735	cacna1ba	GO:0070588	calcium ion transmembrane transport	IEA
ENSDARG00000021735	cacna1ba	GO:0086010	membrane depolarization during action potential	IBA
ENSDARG00000021735	cacna1ba	GO:0005245	voltage-gated calcium channel activity	IEA
ENSDARG00000021735	cacna1ba	GO:0005262	calcium channel activity	IEA
ENSDARG00000021735	cacna1ba	GO:0006816	calcium ion transport	IEA
ENSDARG00000021735	cacna1ba	GO:0005891	voltage-gated calcium channel complex	IEA
ENSDARG00000021735	cacna1ba	GO:0008331	high voltage-gated calcium channel activity	IBA
ENSDARG00000021789	myoc	GO:0005615	extracellular space	IEA
ENSDARG00000021789	myoc	GO:0030335	positive regulation of cell migration	IEA
ENSDARG00000021789	myoc	GO:0051492	regulation of stress fiber assembly	IEA
ENSDARG00000021789	myoc	GO:0001952	regulation of cell-matrix adhesion	IEA
ENSDARG00000021869	rcan2	GO:0003676	nucleic acid binding	IEA
ENSDARG00000021869	rcan2	GO:0005622	intracellular	IEA
ENSDARG00000021869	rcan2	GO:0019722	calcium-mediated signaling	IEA
ENSDARG00000021869	rcan2	GO:0005737	cytoplasm	IBA
ENSDARG00000021869	rcan2	GO:0050790	regulation of catalytic activity	IEA
ENSDARG00000021869	rcan2	GO:0008597	calcium-dependent protein serine/threonine phosphatase regulator activity	IBA
ENSDARG00000021869	rcan2	GO:0070884	regulation of calcineurin-NFAT signaling cascade	IBA
ENSDARG00000021895	disc1	GO:0048701	embryonic cranial skeleton morphogenesis	IMP
ENSDARG00000021895	disc1	GO:0007399	nervous system development	IMP
ENSDARG00000021895	disc1	GO:0007420	brain development	IMP
ENSDARG00000021895	disc1	GO:0060027	convergent extension involved in gastrulation	IMP
ENSDARG00000021895	disc1	GO:0001755	neural crest cell migration	IMP
ENSDARG00000021895	disc1	GO:0021755	eurydendroid cell differentiation	IMP
ENSDARG00000021895	disc1	GO:0021778	oligodendrocyte cell fate specification	IMP
ENSDARG00000021895	disc1	GO:0033555	multicellular organismal response to stress	IMP
ENSDARG00000021895	disc1	GO:0010001	glial cell differentiation	IGI
ENSDARG00000021895	disc1	GO:0010001	glial cell differentiation	IMP
ENSDARG00000021895	disc1	GO:0010470	regulation of gastrulation	IMP
ENSDARG00000021895	disc1	GO:0060351	cartilage development involved in endochondral bone morphogenesis	IMP
ENSDARG00000021895	disc1	GO:0021854	hypothalamus development	IMP
ENSDARG00000022020	focad
ENSDARG00000022187	usp6nl
ENSDARG00000022187	usp6nl	GO:0005622	intracellular	IBA
ENSDARG00000022187	usp6nl	GO:0005096	GTPase activator activity	IBA
ENSDARG00000022187	usp6nl	GO:0017137	Rab GTPase binding	IBA
ENSDARG00000022187	usp6nl	GO:0006886	intracellular protein transport	IBA
ENSDARG00000022187	usp6nl	GO:0031338	regulation of vesicle fusion	IBA
ENSDARG00000022187	usp6nl	GO:0090630	activation of GTPase activity	IBA
ENSDARG00000022187	usp6nl	GO:0012505	endomembrane system	IBA
ENSDARG00000022260	si:ch211-57i17.1	GO:0005737	cytoplasm	IBA
ENSDARG00000022260	si:ch211-57i17.1	GO:0003674	molecular_function	ND
ENSDARG00000022260	si:ch211-57i17.1	GO:0007411	axon guidance	IBA
ENSDARG00000022260	si:ch211-57i17.1	GO:0030424	axon	IBA
ENSDARG00000022512	zgc:109913
ENSDARG00000022895	mcf2a	GO:0005622	intracellular	IEA
ENSDARG00000022895	mcf2a	GO:0035556	intracellular signal transduction	IEA
ENSDARG00000022895	mcf2a	GO:0005085	guanyl-nucleotide exchange factor activity	IEA
ENSDARG00000022895	mcf2a	GO:0005089	Rho guanyl-nucleotide exchange factor activity	IEA
ENSDARG00000022895	mcf2a	GO:0035023	regulation of Rho protein signal transduction	IEA
ENSDARG00000022895	mcf2a	GO:0065009	regulation of molecular function	IEA
ENSDARG00000022895	mcf2a
ENSDARG00000023214	mob2a	GO:0008150	biological_process	ND
ENSDARG00000023214	mob2a	GO:0005575	cellular_component	ND
ENSDARG00000023484	fam101a	GO:0031005	filamin binding	IEA
ENSDARG00000023484	fam101a	GO:0061181	regulation of chondrocyte development	IEA
ENSDARG00000023484	fam101a	GO:0061572	actin filament bundle organization	IEA
ENSDARG00000023771	gabrb3	GO:0016020	membrane	IEA
ENSDARG00000023771	gabrb3	GO:0004890	GABA-A receptor activity	IBA
ENSDARG00000023771	gabrb3	GO:0005216	ion channel activity	IEA
ENSDARG00000023771	gabrb3	GO:0005230	extracellular ligand-gated ion channel activity	IEA
ENSDARG00000023771	gabrb3	GO:0006810	transport	IEA
ENSDARG00000023771	gabrb3	GO:0006811	ion transport	IEA
ENSDARG00000023771	gabrb3	GO:0007165	signal transduction	IEA
ENSDARG00000023771	gabrb3	GO:0034220	ion transmembrane transport	IEA
ENSDARG00000023771	gabrb3	GO:0005886	plasma membrane	IEA
ENSDARG00000023771	gabrb3	GO:0016021	integral component of membrane	IEA
ENSDARG00000023771	gabrb3	GO:0030054	cell junction	IEA
ENSDARG00000023771	gabrb3	GO:0045202	synapse	IEA
ENSDARG00000023771	gabrb3	GO:1902711	GABA-A receptor complex	IBA
ENSDARG00000023771	gabrb3	GO:0055085	transmembrane transport	IEA
ENSDARG00000023771	gabrb3	GO:0004890	GABA-A receptor activity	IEA
ENSDARG00000023861	dnase1l1l	GO:0060041	retina development in camera-type eye	IMP
ENSDARG00000023861	dnase1l1l	GO:0005634	nucleus	IBA
ENSDARG00000023861	dnase1l1l	GO:0016787	hydrolase activity	IEA
ENSDARG00000023861	dnase1l1l	GO:0090305	nucleic acid phosphodiester bond hydrolysis	IEA
ENSDARG00000023861	dnase1l1l	GO:0004518	nuclease activity	IEA
ENSDARG00000023861	dnase1l1l	GO:0004519	endonuclease activity	IEA
ENSDARG00000023861	dnase1l1l	GO:0002088	lens development in camera-type eye	IMP
ENSDARG00000023861	dnase1l1l	GO:0004536	deoxyribonuclease activity	IEA
ENSDARG00000023861	dnase1l1l	GO:0006308	DNA catabolic process	IEA
ENSDARG00000024306	zbed4	GO:0046983	protein dimerization activity	IEA
ENSDARG00000024306	zbed4	GO:0003677	DNA binding	IEA
ENSDARG00000024306	zbed4	GO:0003700	transcription factor activity, sequence-specific DNA binding	IBA
ENSDARG00000024306	zbed4	GO:0005634	nucleus	IBA
ENSDARG00000024306	zbed4	GO:0006357	regulation of transcription from RNA polymerase II promoter	IBA
ENSDARG00000024306	zbed4	GO:0000977	RNA polymerase II regulatory region sequence-specific DNA binding	IBA
ENSDARG00000024537	emilin1a	GO:0030097	hemopoiesis	IMP
ENSDARG00000024537	emilin1a	GO:0005576	extracellular region	IEA
ENSDARG00000024537	emilin1a	GO:0007155	cell adhesion	IBA
ENSDARG00000024537	emilin1a	GO:0031012	extracellular matrix	IBA
ENSDARG00000024537	emilin1a	GO:0005581	collagen trimer	IEA
ENSDARG00000024537	emilin1a	GO:0030023	extracellular matrix constituent conferring elasticity	IBA
ENSDARG00000024546	pla2g4aa	GO:0046872	metal ion binding	IEA
ENSDARG00000024546	pla2g4aa	GO:0005737	cytoplasm	IEA
ENSDARG00000024546	pla2g4aa	GO:0008152	metabolic process	IEA
ENSDARG00000024546	pla2g4aa	GO:0016787	hydrolase activity	IEA
ENSDARG00000024546	pla2g4aa	GO:0006629	lipid metabolic process	IEA
ENSDARG00000024546	pla2g4aa	GO:0016042	lipid catabolic process	IEA
ENSDARG00000024546	pla2g4aa	GO:0004620	phospholipase activity	IEA
ENSDARG00000024546	pla2g4aa	GO:0009395	phospholipid catabolic process	IEA
ENSDARG00000024546	pla2g4aa	GO:0004623	phospholipase A2 activity	IEA
ENSDARG00000024546	pla2g4aa	GO:0102567	phospholipase A2 activity (consuming 1,2-dipalmitoylphosphatidylcholine)	IEA
ENSDARG00000024546	pla2g4aa	GO:0102568	phospholipase A2 activity consuming 1,2-dioleoylphosphatidylethanolamine)	IEA
ENSDARG00000024546	pla2g4aa
ENSDARG00000024548	cryba4	GO:0005212	structural constituent of eye lens	IEA
ENSDARG00000024687	polr3g	GO:0003899	DNA-directed 5'-3' RNA polymerase activity	IEA
ENSDARG00000024687	polr3g	GO:0000790	nuclear chromatin	IBA
ENSDARG00000024687	polr3g	GO:0006383	transcription from RNA polymerase III promoter	IEA
ENSDARG00000024687	polr3g	GO:0005666	DNA-directed RNA polymerase III complex	IBA
ENSDARG00000024687	polr3g	GO:0008283	cell proliferation	IBA
ENSDARG00000025089	loxl4	GO:0016020	membrane	IEA
ENSDARG00000025089	loxl4	GO:0005044	scavenger receptor activity	IEA
ENSDARG00000025089	loxl4	GO:0006898	receptor-mediated endocytosis	IEA
ENSDARG00000025089	loxl4	GO:0055114	oxidation-reduction process	IEA
ENSDARG00000025089	loxl4	GO:0005507	copper ion binding	IEA
ENSDARG00000025089	loxl4	GO:0016641	oxidoreductase activity, acting on the CH-NH2 group of donors, oxygen as acceptor	IEA
ENSDARG00000025162	asic4a	GO:0016020	membrane	IEA
ENSDARG00000025162	asic4a	GO:0006810	transport	IEA
ENSDARG00000025162	asic4a	GO:0006811	ion transport	IEA
ENSDARG00000025162	asic4a	GO:0016021	integral component of membrane	IEA
ENSDARG00000025162	asic4a	GO:0005272	sodium channel activity	IEA
ENSDARG00000025162	asic4a	GO:0006814	sodium ion transport	IEA
ENSDARG00000025162	asic4a	GO:0035725	sodium ion transmembrane transport	IEA
ENSDARG00000025162	asic4a	GO:0060078	regulation of postsynaptic membrane potential	IEA
ENSDARG00000025162	asic4a	GO:0005248	voltage-gated sodium channel activity	ISS
ENSDARG00000025162	asic4a	GO:0045177	apical part of cell	ISS
ENSDARG00000025212	cpsf3l
ENSDARG00000025468	bnip3la	GO:0016020	membrane	IEA
ENSDARG00000025468	bnip3la	GO:0016021	integral component of membrane	IEA
ENSDARG00000025468	bnip3la	GO:0005783	endoplasmic reticulum	IBA
ENSDARG00000025468	bnip3la	GO:0051607	defense response to virus	IBA
ENSDARG00000025468	bnip3la	GO:0043065	positive regulation of apoptotic process	IEA
ENSDARG00000025468	bnip3la	GO:0005740	mitochondrial envelope	IEA
ENSDARG00000025468	bnip3la	GO:0005635	nuclear envelope	IBA
ENSDARG00000025468	bnip3la	GO:0005741	mitochondrial outer membrane	IBA
ENSDARG00000025468	bnip3la	GO:0043069	negative regulation of programmed cell death	IBA
ENSDARG00000025468	bnip3la	GO:0097345	mitochondrial outer membrane permeabilization	IBA
ENSDARG00000025808	taf5l
ENSDARG00000025875	kctd2	GO:0031463	Cul3-RING ubiquitin ligase complex	IBA
ENSDARG00000025875	kctd2	GO:0043161	proteasome-mediated ubiquitin-dependent protein catabolic process	IBA
ENSDARG00000025875	kctd2	GO:0032403	protein complex binding	IBA
ENSDARG00000025875	kctd2	GO:0097602	cullin family protein binding	IBA
ENSDARG00000025875	kctd2	GO:0051260	protein homooligomerization	IEA
ENSDARG00000026166	emilin1b	GO:0005576	extracellular region	IEA
ENSDARG00000026166	emilin1b	GO:0007155	cell adhesion	IBA
ENSDARG00000026166	emilin1b	GO:0031012	extracellular matrix	IBA
ENSDARG00000026166	emilin1b	GO:0005581	collagen trimer	IEA
ENSDARG00000026166	emilin1b	GO:0030023	extracellular matrix constituent conferring elasticity	IBA
ENSDARG00000026313	adgre5a	GO:0005509	calcium ion binding	IEA
ENSDARG00000026417	ccr12b.2	GO:0016020	membrane	IEA
ENSDARG00000026417	ccr12b.2	GO:0016021	integral component of membrane	IEA
ENSDARG00000026417	ccr12b.2	GO:0004871	signal transducer activity	IEA
ENSDARG00000026417	ccr12b.2	GO:0004930	G-protein coupled receptor activity	IEA
ENSDARG00000026417	ccr12b.2	GO:0007165	signal transduction	IEA
ENSDARG00000026417	ccr12b.2	GO:0007186	G-protein coupled receptor signaling pathway	IEA
ENSDARG00000026417	ccr12b.2	GO:0006935	chemotaxis	IEA
ENSDARG00000026417	ccr12b.2	GO:0004950	chemokine receptor activity	IEA
ENSDARG00000026417	ccr12b.2	GO:0070098	chemokine-mediated signaling pathway	IEA
ENSDARG00000026519	ralgps2	GO:0005622	intracellular	IEA
ENSDARG00000026519	ralgps2	GO:0005085	guanyl-nucleotide exchange factor activity	IEA
ENSDARG00000026519	ralgps2	GO:0007264	small GTPase mediated signal transduction	IEA
ENSDARG00000026519	ralgps2	GO:0065009	regulation of molecular function	IEA
ENSDARG00000026519	ralgps2	GO:0032485	regulation of Ral protein signal transduction	IEA
ENSDARG00000026840	arhgap23b	GO:0007165	signal transduction	IEA
ENSDARG00000026840	arhgap23b	GO:0005096	GTPase activator activity	IEA
ENSDARG00000026840	arhgap23b	GO:0043547	positive regulation of GTPase activity	IBA
ENSDARG00000026840	arhgap23b	GO:0005096	GTPase activator activity	IBA
ENSDARG00000026925	nos2a	GO:0046872	metal ion binding	IEA
ENSDARG00000026925	nos2a	GO:0005622	intracellular	IEA
ENSDARG00000026925	nos2a	GO:0016491	oxidoreductase activity	IEA
ENSDARG00000026925	nos2a	GO:0055114	oxidation-reduction process	IEA
ENSDARG00000026925	nos2a	GO:0005506	iron ion binding	IEA
ENSDARG00000026925	nos2a	GO:0020037	heme binding	IEA
ENSDARG00000026925	nos2a	GO:0006954	inflammatory response	IBA
ENSDARG00000026925	nos2a	GO:0005516	calmodulin binding	IEA
ENSDARG00000026925	nos2a	GO:0050660	flavin adenine dinucleotide binding	IEA
ENSDARG00000026925	nos2a	GO:0009749	response to glucose	IDA
ENSDARG00000026925	nos2a	GO:0050661	NADP binding	IEA
ENSDARG00000026925	nos2a	GO:0010181	FMN binding	IEA
ENSDARG00000026925	nos2a	GO:0004517	nitric-oxide synthase activity	IEA
ENSDARG00000026925	nos2a	GO:0006809	nitric oxide biosynthetic process	IEA
ENSDARG00000026925	nos2a	GO:0032496	response to lipopolysaccharide	IDA
ENSDARG00000026925	nos2a	GO:0097755	positive regulation of blood vessel diameter	IBA
ENSDARG00000026925	nos2a	GO:0009611	response to wounding	IDA
ENSDARG00000026925	nos2a	GO:0003958	NADPH-hemoprotein reductase activity	IBA
ENSDARG00000026925	nos2a	GO:0004517	nitric-oxide synthase activity	IBA
ENSDARG00000026925	nos2a	GO:0007263	nitric oxide mediated signal transduction	IBA
ENSDARG00000026925	nos2a	GO:0031284	positive regulation of guanylate cyclase activity	IBA
ENSDARG00000026925	nos2a	GO:0042742	defense response to bacterium	IBA
ENSDARG00000026925	nos2a	GO:0045776	negative regulation of blood pressure	IBA
ENSDARG00000026925	nos2a
ENSDARG00000027016	gbf1	GO:0005086	ARF guanyl-nucleotide exchange factor activity	IEA
ENSDARG00000027016	gbf1	GO:0032012	regulation of ARF protein signal transduction	IEA
ENSDARG00000027016	gbf1	GO:0065009	regulation of molecular function	IEA
ENSDARG00000027016	gbf1
ENSDARG00000027041	pcdh17	GO:0016020	membrane	IEA
ENSDARG00000027041	pcdh17	GO:0016021	integral component of membrane	IEA
ENSDARG00000027041	pcdh17	GO:0060041	retina development in camera-type eye	IMP
ENSDARG00000027041	pcdh17	GO:0005509	calcium ion binding	IEA
ENSDARG00000027041	pcdh17	GO:0005887	integral component of plasma membrane	IBA
ENSDARG00000027041	pcdh17	GO:0007155	cell adhesion	IEA
ENSDARG00000027041	pcdh17	GO:0007156	homophilic cell adhesion via plasma membrane adhesion molecules	IEA
ENSDARG00000027041	pcdh17	GO:0005886	plasma membrane	IEA
ENSDARG00000027041	pcdh17	GO:0007155	cell adhesion	IBA
ENSDARG00000027041	pcdh17	GO:0007267	cell-cell signaling	IBA
ENSDARG00000027041	pcdh17	GO:0060219	camera-type eye photoreceptor cell differentiation	IMP
ENSDARG00000027041	pcdh17	GO:0007416	synapse assembly	IBA
ENSDARG00000027082	hmbox1a	GO:0005634	nucleus	IEA
ENSDARG00000027082	hmbox1a	GO:0003677	DNA binding	IEA
ENSDARG00000027082	hmbox1a	GO:0043565	sequence-specific DNA binding	IEA
ENSDARG00000027082	hmbox1a	GO:0045893	positive regulation of transcription, DNA-templated	IEA
ENSDARG00000027279	numb	GO:0005737	cytoplasm	IDA
ENSDARG00000027279	numb	GO:0016323	basolateral plasma membrane	IDA
ENSDARG00000027279	numb	GO:0005886	plasma membrane	IDA
ENSDARG00000027279	numb	GO:0060319	primitive erythrocyte differentiation	IGI
ENSDARG00000027279	numb	GO:0060319	primitive erythrocyte differentiation	IMP
ENSDARG00000027424	slc25a3a	GO:0006810	transport	IEA
ENSDARG00000027424	slc25a3a	GO:0016020	membrane	IEA
ENSDARG00000027424	slc25a3a	GO:0016021	integral component of membrane	IEA
ENSDARG00000027424	slc25a3a	GO:0016021	integral component of membrane	IBA
ENSDARG00000027424	slc25a3a	GO:0006839	mitochondrial transport	IBA
ENSDARG00000027424	slc25a3a	GO:0005743	mitochondrial inner membrane	IBA
ENSDARG00000027424	slc25a3a	GO:0035435	phosphate ion transmembrane transport	IEA
ENSDARG00000027424	slc25a3a	GO:0015114	phosphate ion transmembrane transporter activity	IBA
ENSDARG00000027428	rpp30
ENSDARG00000027428	rpp30	GO:0003824	catalytic activity	IEA
ENSDARG00000027428	rpp30	GO:0003723	RNA binding	IBA
ENSDARG00000027428	rpp30	GO:0004540	ribonuclease activity	IEA
ENSDARG00000027428	rpp30	GO:0003735	structural constituent of ribosome	IEA
ENSDARG00000027428	rpp30	GO:0006412	translation	IEA
ENSDARG00000027428	rpp30	GO:0005840	ribosome	IEA
ENSDARG00000027428	rpp30	GO:0008033	tRNA processing	IEA
ENSDARG00000027428	rpp30	GO:0090502	RNA phosphodiester bond hydrolysis, endonucleolytic	IBA
ENSDARG00000027428	rpp30	GO:0005655	nucleolar ribonuclease P complex	IBA
ENSDARG00000027428	rpp30	GO:0008033	tRNA processing	IBA
ENSDARG00000027428	rpp30	GO:0004526	ribonuclease P activity	IBA
ENSDARG00000027582	angptl7	GO:0005575	cellular_component	ND
ENSDARG00000027907	si:ch211-216p19.6	GO:0005622	intracellular	IEA
ENSDARG00000027907	si:ch211-216p19.6	GO:0046872	metal ion binding	IEA
ENSDARG00000027907	si:ch211-216p19.6	GO:0008270	zinc ion binding	IEA
ENSDARG00000027907	si:ch211-216p19.6
ENSDARG00000028096	si:ch211-95j8.2	GO:0005886	plasma membrane	IEA
ENSDARG00000028096	si:ch211-95j8.2	GO:0016020	membrane	IEA
ENSDARG00000028096	si:ch211-95j8.2	GO:0016021	integral component of membrane	IEA
ENSDARG00000028096	si:ch211-95j8.2	GO:0030054	cell junction	IEA
ENSDARG00000028096	si:ch211-95j8.2	GO:0005198	structural molecule activity	IEA
ENSDARG00000028096	si:ch211-95j8.2	GO:0005923	bicellular tight junction	IEA
ENSDARG00000028173	slc4a2a	GO:0016020	membrane	IEA
ENSDARG00000028173	slc4a2a	GO:0006810	transport	IEA
ENSDARG00000028173	slc4a2a	GO:0006811	ion transport	IEA
ENSDARG00000028173	slc4a2a	GO:0016021	integral component of membrane	IEA
ENSDARG00000028173	slc4a2a	GO:0035725	sodium ion transmembrane transport	IEA
ENSDARG00000028173	slc4a2a	GO:0005887	integral component of plasma membrane	IBA
ENSDARG00000028173	slc4a2a	GO:0016323	basolateral plasma membrane	IDA
ENSDARG00000028173	slc4a2a	GO:0005452	inorganic anion exchanger activity	IEA
ENSDARG00000028173	slc4a2a	GO:0008509	anion transmembrane transporter activity	IEA
ENSDARG00000028173	slc4a2a	GO:0008510	sodium:bicarbonate symporter activity	IBA
ENSDARG00000028173	slc4a2a	GO:0006820	anion transport	IEA
ENSDARG00000028173	slc4a2a	GO:0015698	inorganic anion transport	IEA
ENSDARG00000028173	slc4a2a	GO:0015701	bicarbonate transport	IEA
ENSDARG00000028173	slc4a2a	GO:0051453	regulation of intracellular pH	IBA
ENSDARG00000028173	slc4a2a	GO:0098656	anion transmembrane transport	IEA
ENSDARG00000028173	slc4a2a	GO:0016324	apical plasma membrane	IDA
ENSDARG00000028173	slc4a2a	GO:0015301	anion:anion antiporter activity	IDA
ENSDARG00000028173	slc4a2a	GO:0006820	anion transport	IDA
ENSDARG00000028173	slc4a2a
ENSDARG00000028949	ZBTB26	GO:0003676	nucleic acid binding	IEA
ENSDARG00000029168	ppfibp2b
ENSDARG00000029474	camk1b	GO:0000166	nucleotide binding	IEA
ENSDARG00000029474	camk1b	GO:0005524	ATP binding	IEA
ENSDARG00000029474	camk1b	GO:0004672	protein kinase activity	IEA
ENSDARG00000029474	camk1b	GO:0006468	protein phosphorylation	IEA
ENSDARG00000029474	camk1b	GO:0004674	protein serine/threonine kinase activity	IEA
ENSDARG00000029474	camk1b	GO:0018105	peptidyl-serine phosphorylation	IBA
ENSDARG00000029474	camk1b	GO:0035556	intracellular signal transduction	IBA
ENSDARG00000029474	camk1b	GO:0005622	intracellular	IBA
ENSDARG00000029474	camk1b	GO:0018107	peptidyl-threonine phosphorylation	IBA
ENSDARG00000029474	camk1b	GO:0004683	calmodulin-dependent protein kinase activity	IBA
ENSDARG00000029474	camk1b	GO:0005516	calmodulin binding	IBA
ENSDARG00000029474	camk1b	GO:0010976	positive regulation of neuron projection development	IBA
ENSDARG00000029474	camk1b
ENSDARG00000029544	id2b	GO:0046983	protein dimerization activity	IEA
ENSDARG00000029544	id2b	GO:0005634	nucleus	IEA
ENSDARG00000029544	id2b	GO:0005737	cytoplasm	IEA
ENSDARG00000029544	id2b	GO:0045892	negative regulation of transcription, DNA-templated	IEA
ENSDARG00000029766	nr1i2	GO:0003700	transcription factor activity, sequence-specific DNA binding	IEA
ENSDARG00000029766	nr1i2	GO:0006355	regulation of transcription, DNA-templated	IEA
ENSDARG00000029766	nr1i2	GO:0005634	nucleus	IEA
ENSDARG00000029766	nr1i2	GO:0003677	DNA binding	IEA
ENSDARG00000029766	nr1i2	GO:0046872	metal ion binding	IEA
ENSDARG00000029766	nr1i2	GO:0008270	zinc ion binding	IEA
ENSDARG00000029766	nr1i2	GO:0003707	steroid hormone receptor activity	IEA
ENSDARG00000029766	nr1i2	GO:0043565	sequence-specific DNA binding	IEA
ENSDARG00000029766	nr1i2	GO:0006351	transcription, DNA-templated	IEA
ENSDARG00000029766	nr1i2	GO:0043401	steroid hormone mediated signaling pathway	IEA
ENSDARG00000029766	nr1i2	GO:0006357	regulation of transcription from RNA polymerase II promoter	IEA
ENSDARG00000029766	nr1i2	GO:0030522	intracellular receptor signaling pathway	IEA
ENSDARG00000029766	nr1i2	GO:0006355	regulation of transcription, DNA-templated	IDA
ENSDARG00000029766	nr1i2	GO:0000981	RNA polymerase II transcription factor activity, sequence-specific DNA binding	IDA
ENSDARG00000029766	nr1i2	GO:0006351	transcription, DNA-templated	IDA
ENSDARG00000029766	nr1i2	GO:0004879	nuclear receptor activity	IDA
ENSDARG00000029766	nr1i2	GO:0006366	transcription from RNA polymerase II promoter	IDA
ENSDARG00000029766	nr1i2	GO:0003707	steroid hormone receptor activity	IDA
ENSDARG00000029766	nr1i2	GO:0009636	response to toxic substance	IDA
ENSDARG00000030239	dennd6aa	GO:0043547	positive regulation of GTPase activity	IBA
ENSDARG00000030239	dennd6aa	GO:0017112	Rab guanyl-nucleotide exchange factor activity	IEA
ENSDARG00000030239	dennd6aa	GO:0017112	Rab guanyl-nucleotide exchange factor activity	IBA
ENSDARG00000030239	dennd6aa	GO:0055037	recycling endosome	IBA
ENSDARG00000030604	phkg1a	GO:0000166	nucleotide binding	IEA
ENSDARG00000030604	phkg1a	GO:0005524	ATP binding	IEA
ENSDARG00000030604	phkg1a	GO:0004672	protein kinase activity	IEA
ENSDARG00000030604	phkg1a	GO:0006468	protein phosphorylation	IEA
ENSDARG00000030604	phkg1a	GO:0004674	protein serine/threonine kinase activity	IEA
ENSDARG00000030604	phkg1a	GO:0018105	peptidyl-serine phosphorylation	IBA
ENSDARG00000030604	phkg1a	GO:0035556	intracellular signal transduction	IBA
ENSDARG00000030604	phkg1a	GO:0005516	calmodulin binding	IEA
ENSDARG00000030604	phkg1a	GO:0001525	angiogenesis	IMP
ENSDARG00000030604	phkg1a	GO:0005978	glycogen biosynthetic process	IEA
ENSDARG00000030604	phkg1a	GO:0004689	phosphorylase kinase activity	IEA
ENSDARG00000030604	phkg1a	GO:0004689	phosphorylase kinase activity	IBA
ENSDARG00000030604	phkg1a	GO:0005977	glycogen metabolic process	IBA
ENSDARG00000030604	phkg1a	GO:0018107	peptidyl-threonine phosphorylation	IBA
ENSDARG00000030604	phkg1a	GO:0005964	phosphorylase kinase complex	IEA
ENSDARG00000030604	phkg1a	GO:0005964	phosphorylase kinase complex	IBA
ENSDARG00000030650	r3hdml
ENSDARG00000030656	sept3	GO:0005525	GTP binding	IEA
ENSDARG00000030656	sept3	GO:0000166	nucleotide binding	IEA
ENSDARG00000030656	sept3	GO:0005737	cytoplasm	IEA
ENSDARG00000030656	sept3	GO:0007049	cell cycle	IEA
ENSDARG00000030723	cldn11b	GO:0005886	plasma membrane	IEA
ENSDARG00000030723	cldn11b	GO:0016020	membrane	IEA
ENSDARG00000030723	cldn11b	GO:0016021	integral component of membrane	IEA
ENSDARG00000030723	cldn11b	GO:0030054	cell junction	IEA
ENSDARG00000030723	cldn11b	GO:0005198	structural molecule activity	IEA
ENSDARG00000030723	cldn11b	GO:0005923	bicellular tight junction	IEA
ENSDARG00000030803	zgc:110006	GO:0005575	cellular_component	ND
ENSDARG00000030803	zgc:110006	GO:0003674	molecular_function	ND
ENSDARG00000030803	zgc:110006	GO:0007399	nervous system development	IEA
ENSDARG00000030803	zgc:110006	GO:0030154	cell differentiation	IEA
ENSDARG00000030803	zgc:110006	GO:0060999	positive regulation of dendritic spine development	ISS
ENSDARG00000030803	zgc:110006	GO:0021895	cerebral cortex neuron differentiation	ISS
ENSDARG00000031420	wt1a	GO:0003676	nucleic acid binding	IEA
ENSDARG00000031420	wt1a	GO:0006355	regulation of transcription, DNA-templated	IEA
ENSDARG00000031420	wt1a	GO:0005634	nucleus	IEA
ENSDARG00000031420	wt1a	GO:0032835	glomerulus development	IMP
ENSDARG00000031420	wt1a	GO:0048793	pronephros development	IGI
ENSDARG00000031420	wt1a	GO:0048793	pronephros development	IMP
ENSDARG00000031420	wt1a	GO:0039022	pronephric duct development	IGI
ENSDARG00000031420	wt1a	GO:0061032	visceral serous pericardium development	IGI
ENSDARG00000031420	wt1a	GO:0061032	visceral serous pericardium development	IMP
ENSDARG00000031420	wt1a	GO:0030325	adrenal gland development	IGI
ENSDARG00000031420	wt1a	GO:0030325	adrenal gland development	IMP
ENSDARG00000031420	wt1a	GO:0039021	pronephric glomerulus development	IGI
ENSDARG00000031420	wt1a	GO:0039021	pronephric glomerulus development	IMP
ENSDARG00000031420	wt1a	GO:0072149	glomerular visceral epithelial cell fate commitment	IGI
ENSDARG00000031420	wt1a	GO:0072112	glomerular visceral epithelial cell differentiation	IGI
ENSDARG00000031420	wt1a	GO:0072112	glomerular visceral epithelial cell differentiation	IMP
ENSDARG00000031420	wt1a	GO:0008285	negative regulation of cell proliferation	IBA
ENSDARG00000031548	ephb3a	GO:0016740	transferase activity	IEA
ENSDARG00000031548	ephb3a	GO:0016020	membrane	IEA
ENSDARG00000031548	ephb3a	GO:0016021	integral component of membrane	IEA
ENSDARG00000031548	ephb3a	GO:0000166	nucleotide binding	IEA
ENSDARG00000031548	ephb3a	GO:0005524	ATP binding	IEA
ENSDARG00000031548	ephb3a	GO:0004672	protein kinase activity	IEA
ENSDARG00000031548	ephb3a	GO:0006468	protein phosphorylation	IEA
ENSDARG00000031548	ephb3a	GO:0004713	protein tyrosine kinase activity	IEA
ENSDARG00000031548	ephb3a	GO:0016301	kinase activity	IEA
ENSDARG00000031548	ephb3a	GO:0007169	transmembrane receptor protein tyrosine kinase signaling pathway	IEA
ENSDARG00000031548	ephb3a	GO:0016310	phosphorylation	IEA
ENSDARG00000031548	ephb3a	GO:0018108	peptidyl-tyrosine phosphorylation	IEA
ENSDARG00000031548	ephb3a	GO:0005887	integral component of plasma membrane	IEA
ENSDARG00000031548	ephb3a	GO:0005003	ephrin receptor activity	IEA
ENSDARG00000031548	ephb3a	GO:0048013	ephrin receptor signaling pathway	IEA
ENSDARG00000031598	calb1	GO:0005509	calcium ion binding	IEA
ENSDARG00000031598	calb1	GO:0055074	calcium ion homeostasis	IEA
ENSDARG00000031598	calb1
ENSDARG00000031600	rd3	GO:0008150	biological_process	ND
ENSDARG00000031600	rd3	GO:0005575	cellular_component	ND
ENSDARG00000031600	rd3	GO:0003674	molecular_function	ND
ENSDARG00000031657	fahd1	GO:0005575	cellular_component	ND
ENSDARG00000031657	fahd1	GO:0003824	catalytic activity	IEA
ENSDARG00000031657	fahd1	GO:0008152	metabolic process	IEA
ENSDARG00000031796	ache	GO:0005886	plasma membrane	IEA
ENSDARG00000031796	ache	GO:0016020	membrane	IEA
ENSDARG00000031796	ache	GO:0030054	cell junction	IEA
ENSDARG00000031796	ache	GO:0045202	synapse	IEA
ENSDARG00000031796	ache	GO:0016787	hydrolase activity	IEA
ENSDARG00000031796	ache	GO:0005576	extracellular region	IEA
ENSDARG00000031796	ache	GO:0007528	neuromuscular junction development	IMP
ENSDARG00000031796	ache	GO:0030239	myofibril assembly	IMP
ENSDARG00000031796	ache	GO:0009749	response to glucose	IDA
ENSDARG00000031796	ache	GO:0048666	neuron development	IMP
ENSDARG00000031796	ache	GO:0052689	carboxylic ester hydrolase activity	IEA
ENSDARG00000031796	ache	GO:0004104	cholinesterase activity	IEA
ENSDARG00000031796	ache	GO:0045471	response to ethanol	IDA
ENSDARG00000031796	ache	GO:0071405	cellular response to methanol	IDA
ENSDARG00000031796	ache	GO:0050803	regulation of synapse structure or activity	IMP
ENSDARG00000031796	ache	GO:0042135	neurotransmitter catabolic process	IEA
ENSDARG00000031796	ache	GO:0003990	acetylcholinesterase activity	IEA
ENSDARG00000031796	ache	GO:0003990	acetylcholinesterase activity	IDA
ENSDARG00000031796	ache	GO:0003990	acetylcholinesterase activity	IMP
ENSDARG00000031796	ache	GO:0001975	response to amphetamine	IMP
ENSDARG00000031796	ache	GO:0006581	acetylcholine catabolic process	IDA
ENSDARG00000031796	ache	GO:0006581	acetylcholine catabolic process	IMP
ENSDARG00000031845	mboat2a	GO:0016020	membrane	IEA
ENSDARG00000031845	mboat2a	GO:0016021	integral component of membrane	IEA
ENSDARG00000031845	mboat2a
ENSDARG00000031848	pparg	GO:0006355	regulation of transcription, DNA-templated	IEA
ENSDARG00000031848	pparg	GO:0005634	nucleus	IEA
ENSDARG00000031848	pparg	GO:0003677	DNA binding	IEA
ENSDARG00000031848	pparg	GO:0046872	metal ion binding	IEA
ENSDARG00000031848	pparg	GO:0005737	cytoplasm	IEA
ENSDARG00000031848	pparg	GO:0006351	transcription, DNA-templated	IEA
ENSDARG00000031848	pparg	GO:0004879	nuclear receptor activity	IEA
ENSDARG00000031848	pparg	GO:0030522	intracellular receptor signaling pathway	IEA
ENSDARG00000031848	pparg	GO:0070328	triglyceride homeostasis	IGI
ENSDARG00000031848	pparg	GO:0048511	rhythmic process	IEA
ENSDARG00000031848	pparg	GO:0003700	transcription factor activity, sequence-specific DNA binding	IEA
ENSDARG00000031848	pparg	GO:0008270	zinc ion binding	IEA
ENSDARG00000031848	pparg	GO:0003707	steroid hormone receptor activity	IEA
ENSDARG00000031848	pparg	GO:0043565	sequence-specific DNA binding	IEA
ENSDARG00000031848	pparg	GO:0043401	steroid hormone mediated signaling pathway	IEA
ENSDARG00000032103	mapk6	GO:0004672	protein kinase activity	IEA
ENSDARG00000032103	mapk6	GO:0005524	ATP binding	IEA
ENSDARG00000032103	mapk6	GO:0006468	protein phosphorylation	IEA
ENSDARG00000032103	mapk6	GO:0005737	cytoplasm	IBA
ENSDARG00000032103	mapk6	GO:0005634	nucleus	IBA
ENSDARG00000032103	mapk6	GO:0016301	kinase activity	IEA
ENSDARG00000032103	mapk6	GO:0016310	phosphorylation	IEA
ENSDARG00000032103	mapk6	GO:0004707	MAP kinase activity	IEA
ENSDARG00000032103	mapk6	GO:0000165	MAPK cascade	IEA
ENSDARG00000032103	mapk6	GO:0010468	regulation of gene expression	IBA
ENSDARG00000032103	mapk6	GO:0004707	MAP kinase activity	IBA
ENSDARG00000032103	mapk6	GO:0071310	cellular response to organic substance	IBA
ENSDARG00000032552	march5	GO:0016020	membrane	IEA
ENSDARG00000032552	march5	GO:0016021	integral component of membrane	IEA
ENSDARG00000032552	march5	GO:0046872	metal ion binding	IEA
ENSDARG00000032552	march5	GO:0008270	zinc ion binding	IEA
ENSDARG00000032795	tmem8a	GO:0016020	membrane	IEA
ENSDARG00000032795	tmem8a	GO:0016021	integral component of membrane	IEA
ENSDARG00000032795	tmem8a	GO:0005886	plasma membrane	IBA
ENSDARG00000032801	grk5	GO:0016740	transferase activity	IEA
ENSDARG00000032801	grk5	GO:0000166	nucleotide binding	IEA
ENSDARG00000032801	grk5	GO:0005524	ATP binding	IEA
ENSDARG00000032801	grk5	GO:0007165	signal transduction	IEA
ENSDARG00000032801	grk5	GO:0004672	protein kinase activity	IEA
ENSDARG00000032801	grk5	GO:0004674	protein serine/threonine kinase activity	IEA
ENSDARG00000032801	grk5	GO:0006468	protein phosphorylation	IEA
ENSDARG00000032801	grk5	GO:0016301	kinase activity	IEA
ENSDARG00000032801	grk5	GO:0016310	phosphorylation	IEA
ENSDARG00000032801	grk5	GO:0007507	heart development	IMP
ENSDARG00000032801	grk5	GO:0004703	G-protein coupled receptor kinase activity	IEA
ENSDARG00000032801	grk5	GO:0008016	regulation of heart contraction	IMP
ENSDARG00000032801	grk5	GO:0030177	positive regulation of Wnt signaling pathway	IMP
ENSDARG00000032963	her12	GO:0046983	protein dimerization activity	IEA
ENSDARG00000032963	her12	GO:0006355	regulation of transcription, DNA-templated	IEA
ENSDARG00000032963	her12	GO:0003677	DNA binding	IEA
ENSDARG00000032963	her12	GO:0005634	nucleus	IEA
ENSDARG00000032963	her12	GO:0006351	transcription, DNA-templated	IEA
ENSDARG00000032963	her12	GO:0007420	brain development	IMP
ENSDARG00000032963	her12	GO:0001756	somitogenesis	IMP
ENSDARG00000032963	her12	GO:0007219	Notch signaling pathway	IGI
ENSDARG00000033099	kif7	GO:0000166	nucleotide binding	IEA
ENSDARG00000033099	kif7	GO:0005524	ATP binding	IEA
ENSDARG00000033099	kif7	GO:0008017	microtubule binding	IEA
ENSDARG00000033099	kif7	GO:0003777	microtubule motor activity	IEA
ENSDARG00000033099	kif7	GO:0007018	microtubule-based movement	IEA
ENSDARG00000033099	kif7	GO:0003774	motor activity	IEA
ENSDARG00000033099	kif7
ENSDARG00000033380	gyg2	GO:0016740	transferase activity	IEA
ENSDARG00000033380	gyg2	GO:0016757	transferase activity, transferring glycosyl groups	IEA
ENSDARG00000033380	gyg2	GO:0005575	cellular_component	ND
ENSDARG00000033380	gyg2
ENSDARG00000033953	entpd2a.2	GO:0016787	hydrolase activity	IEA
ENSDARG00000033953	entpd2a.2	GO:0045471	response to ethanol	IDA
ENSDARG00000033953	entpd2a.2	GO:0046688	response to copper ion	IDA
ENSDARG00000033953	entpd2a.2	GO:0071405	cellular response to methanol	IDA
ENSDARG00000034107	actl6b
ENSDARG00000034423	sncga	GO:0008150	biological_process	ND
ENSDARG00000034423	sncga	GO:0003674	molecular_function	ND
ENSDARG00000034424	atp1b2b	GO:0006810	transport	IEA
ENSDARG00000034424	atp1b2b	GO:0006811	ion transport	IEA
ENSDARG00000034424	atp1b2b	GO:0016020	membrane	IEA
ENSDARG00000034424	atp1b2b	GO:0016021	integral component of membrane	IEA
ENSDARG00000034424	atp1b2b	GO:0006814	sodium ion transport	IEA
ENSDARG00000034424	atp1b2b	GO:0007507	heart development	IGI
ENSDARG00000034424	atp1b2b	GO:0007507	heart development	IMP
ENSDARG00000034424	atp1b2b	GO:0042472	inner ear morphogenesis	IGI
ENSDARG00000034424	atp1b2b	GO:0042472	inner ear morphogenesis	IMP
ENSDARG00000034424	atp1b2b	GO:0006813	potassium ion transport	IEA
ENSDARG00000034424	atp1b2b	GO:0001964	startle response	IGI
ENSDARG00000034424	atp1b2b	GO:0001964	startle response	IMP
ENSDARG00000034424	atp1b2b	GO:0048923	posterior lateral line neuromast hair cell differentiation	IGI
ENSDARG00000034424	atp1b2b	GO:0048923	posterior lateral line neuromast hair cell differentiation	IMP
ENSDARG00000034424	atp1b2b	GO:0005890	sodium:potassium-exchanging ATPase complex	IEA
ENSDARG00000034424	atp1b2b	GO:0048840	otolith development	IGI
ENSDARG00000034424	atp1b2b	GO:0048840	otolith development	IMP
ENSDARG00000034424	atp1b2b
ENSDARG00000034541	tgfbr2b	GO:0016740	transferase activity	IEA
ENSDARG00000034541	tgfbr2b	GO:0016020	membrane	IEA
ENSDARG00000034541	tgfbr2b	GO:0005886	plasma membrane	IEA
ENSDARG00000034541	tgfbr2b	GO:0016021	integral component of membrane	IEA
ENSDARG00000034541	tgfbr2b	GO:0000166	nucleotide binding	IEA
ENSDARG00000034541	tgfbr2b	GO:0005524	ATP binding	IEA
ENSDARG00000034541	tgfbr2b	GO:0046872	metal ion binding	IEA
ENSDARG00000034541	tgfbr2b	GO:0004672	protein kinase activity	IEA
ENSDARG00000034541	tgfbr2b	GO:0004674	protein serine/threonine kinase activity	IEA
ENSDARG00000034541	tgfbr2b	GO:0006468	protein phosphorylation	IEA
ENSDARG00000034541	tgfbr2b	GO:0016301	kinase activity	IEA
ENSDARG00000034541	tgfbr2b	GO:0016310	phosphorylation	IEA
ENSDARG00000034541	tgfbr2b	GO:0023014	signal transduction by protein phosphorylation	IEA
ENSDARG00000034541	tgfbr2b	GO:0004702	signal transducer, downstream of receptor, with serine/threonine kinase activity	IEA
ENSDARG00000034541	tgfbr2b	GO:0007178	transmembrane receptor protein serine/threonine kinase signaling pathway	IEA
ENSDARG00000034541	tgfbr2b	GO:0004872	receptor activity	IEA
ENSDARG00000034541	tgfbr2b	GO:0030154	cell differentiation	IEA
ENSDARG00000034541	tgfbr2b	GO:0006915	apoptotic process	IEA
ENSDARG00000034541	tgfbr2b	GO:0060218	hematopoietic stem cell differentiation	IGI
ENSDARG00000034541	tgfbr2b	GO:0060218	hematopoietic stem cell differentiation	IMP
ENSDARG00000034541	tgfbr2b	GO:0007179	transforming growth factor beta receptor signaling pathway	IEA
ENSDARG00000034541	tgfbr2b	GO:0005026	transforming growth factor beta receptor activity, type II	IEA
ENSDARG00000034541	tgfbr2b	GO:0040008	regulation of growth	IEA
ENSDARG00000034541	tgfbr2b	GO:0043235	receptor complex	IEA
ENSDARG00000034541	tgfbr2b
ENSDARG00000034572	gpr143	GO:0016020	membrane	IEA
ENSDARG00000034572	gpr143	GO:0016021	integral component of membrane	IEA
ENSDARG00000034572	gpr143	GO:0004930	G-protein coupled receptor activity	IEA
ENSDARG00000034572	gpr143	GO:0007186	G-protein coupled receptor signaling pathway	IEA
ENSDARG00000034572	gpr143	GO:0032438	melanosome organization	IMP
ENSDARG00000034572	gpr143	GO:0035240	dopamine binding	IEA
ENSDARG00000034572	gpr143	GO:0072544	L-DOPA binding	IEA
ENSDARG00000034572	gpr143	GO:0072545	tyrosine binding	IEA
ENSDARG00000034714	esyt1a	GO:0016020	membrane	IEA
ENSDARG00000034714	esyt1a	GO:0016021	integral component of membrane	IEA
ENSDARG00000034714	esyt1a	GO:0008289	lipid binding	IEA
ENSDARG00000034714	esyt1a	GO:0031227	intrinsic component of endoplasmic reticulum membrane	IBA
ENSDARG00000034714	esyt1a	GO:0044232	organelle membrane contact site	IBA
ENSDARG00000034717	def6c
ENSDARG00000035163	tmem136b	GO:0016020	membrane	IEA
ENSDARG00000035163	tmem136b	GO:0016021	integral component of membrane	IEA
ENSDARG00000035163	tmem136b	GO:0008150	biological_process	ND
ENSDARG00000035163	tmem136b	GO:0003674	molecular_function	ND
ENSDARG00000035308	grb10b	GO:0007165	signal transduction	IEA
ENSDARG00000035308	grb10b	GO:0009967	positive regulation of signal transduction	IEA
ENSDARG00000035308	grb10b	GO:0005070	SH3/SH2 adaptor activity	IEA
ENSDARG00000035308	grb10b	GO:0005158	insulin receptor binding	IEA
ENSDARG00000035308	grb10b	GO:0046627	negative regulation of insulin receptor signaling pathway	IEA
ENSDARG00000035308	grb10b
ENSDARG00000035390	tnpo1	GO:0005737	cytoplasm	IBA
ENSDARG00000035390	tnpo1	GO:0006886	intracellular protein transport	IEA
ENSDARG00000035390	tnpo1	GO:0005634	nucleus	IEA
ENSDARG00000035390	tnpo1	GO:0008536	Ran GTPase binding	IEA
ENSDARG00000035390	tnpo1	GO:0008565	protein transporter activity	IBA
ENSDARG00000035390	tnpo1	GO:0008139	nuclear localization sequence binding	IBA
ENSDARG00000035390	tnpo1	GO:0000060	protein import into nucleus, translocation	IBA
ENSDARG00000035390	tnpo1	GO:0006607	NLS-bearing protein import into nucleus	IBA
ENSDARG00000035390	tnpo1	GO:0006610	ribosomal protein import into nucleus	IBA
ENSDARG00000035390	tnpo1	GO:0031965	nuclear membrane	IBA
ENSDARG00000035390	tnpo1	GO:0034399	nuclear periphery	IBA
ENSDARG00000035468	slc25a25b	GO:0006810	transport	IEA
ENSDARG00000035468	slc25a25b	GO:0016020	membrane	IEA
ENSDARG00000035468	slc25a25b	GO:0016021	integral component of membrane	IEA
ENSDARG00000035468	slc25a25b	GO:0005509	calcium ion binding	IEA
ENSDARG00000035468	slc25a25b	GO:0055085	transmembrane transport	IEA
ENSDARG00000035468	slc25a25b	GO:0005743	mitochondrial inner membrane	IEA
ENSDARG00000035468	slc25a25b	GO:0046872	metal ion binding	IEA
ENSDARG00000035468	slc25a25b	GO:0005739	mitochondrion	IEA
ENSDARG00000035468	slc25a25b	GO:0016021	integral component of membrane	IBA
ENSDARG00000035468	slc25a25b	GO:0006839	mitochondrial transport	IBA
ENSDARG00000035468	slc25a25b	GO:0005743	mitochondrial inner membrane	IBA
ENSDARG00000035468	slc25a25b	GO:0005347	ATP transmembrane transporter activity	IBA
ENSDARG00000035468	slc25a25b	GO:0015217	ADP transmembrane transporter activity	IBA
ENSDARG00000035468	slc25a25b	GO:0015866	ADP transport	IEA
ENSDARG00000035468	slc25a25b	GO:0015867	ATP transport	IEA
ENSDARG00000035538	atp6v0a2a	GO:0006810	transport	IEA
ENSDARG00000035538	atp6v0a2a	GO:0006811	ion transport	IEA
ENSDARG00000035538	atp6v0a2a	GO:0016020	membrane	IEA
ENSDARG00000035538	atp6v0a2a	GO:0016021	integral component of membrane	IEA
ENSDARG00000035538	atp6v0a2a	GO:0015078	hydrogen ion transmembrane transporter activity	IEA
ENSDARG00000035538	atp6v0a2a	GO:0015992	proton transport	IEA
ENSDARG00000035538	atp6v0a2a	GO:0005886	plasma membrane	IBA
ENSDARG00000035538	atp6v0a2a	GO:0007035	vacuolar acidification	IBA
ENSDARG00000035538	atp6v0a2a	GO:0070072	vacuolar proton-transporting V-type ATPase complex assembly	IBA
ENSDARG00000035538	atp6v0a2a	GO:0015991	ATP hydrolysis coupled proton transport	IEA
ENSDARG00000035538	atp6v0a2a	GO:0000220	vacuolar proton-transporting V-type ATPase, V0 domain	IEA
ENSDARG00000035538	atp6v0a2a	GO:0033179	proton-transporting V-type ATPase, V0 domain	IEA
ENSDARG00000035538	atp6v0a2a	GO:0046961	proton-transporting ATPase activity, rotational mechanism	IBA
ENSDARG00000035538	atp6v0a2a	GO:0051117	ATPase binding	IBA
ENSDARG00000035538	atp6v0a2a	GO:0015986	ATP synthesis coupled proton transport	IBA
ENSDARG00000035538	atp6v0a2a	GO:0016471	vacuolar proton-transporting V-type ATPase complex	IBA
ENSDARG00000035551	iqcd
ENSDARG00000035578	hs3st1l2	GO:0016740	transferase activity	IEA
ENSDARG00000035578	hs3st1l2	GO:0005575	cellular_component	ND
ENSDARG00000035578	hs3st1l2	GO:0008146	sulfotransferase activity	IEA
ENSDARG00000035578	hs3st1l2	GO:0060271	cilium assembly	IGI
ENSDARG00000035578	hs3st1l2	GO:0060271	cilium assembly	IMP
ENSDARG00000035609	mtnr1c	GO:0016020	membrane	IEA
ENSDARG00000035609	mtnr1c	GO:0016021	integral component of membrane	IEA
ENSDARG00000035609	mtnr1c	GO:0004871	signal transducer activity	IEA
ENSDARG00000035609	mtnr1c	GO:0004930	G-protein coupled receptor activity	IEA
ENSDARG00000035609	mtnr1c	GO:0007165	signal transduction	IEA
ENSDARG00000035609	mtnr1c	GO:0007186	G-protein coupled receptor signaling pathway	IEA
ENSDARG00000035609	mtnr1c	GO:0008502	melatonin receptor activity	IEA
ENSDARG00000035694	stm	GO:0005576	extracellular region	IEA
ENSDARG00000035694	stm	GO:0043049	otic placode formation	IEP
ENSDARG00000035694	stm	GO:0009590	detection of gravity	IMP
ENSDARG00000035694	stm
ENSDARG00000035695	scxa	GO:0046983	protein dimerization activity	IEA
ENSDARG00000035904	crabp1b	GO:0006810	transport	IEA
ENSDARG00000035904	crabp1b	GO:0005737	cytoplasm	IEA
ENSDARG00000035904	crabp1b	GO:0008289	lipid binding	IEA
ENSDARG00000035904	crabp1b	GO:0001972	retinoic acid binding	IEA
ENSDARG00000035904	crabp1b	GO:0034653	retinoic acid catabolic process	IEA
ENSDARG00000036063	ppp1r11	GO:0005634	nucleus	IBA
ENSDARG00000036063	ppp1r11	GO:0004864	protein phosphatase inhibitor activity	IEA
ENSDARG00000036063	ppp1r11	GO:0004865	protein serine/threonine phosphatase inhibitor activity	IBA
ENSDARG00000036063	ppp1r11	GO:0042787	protein ubiquitination involved in ubiquitin-dependent protein catabolic process	ISS
ENSDARG00000036063	ppp1r11	GO:0050710	negative regulation of cytokine secretion	ISS
ENSDARG00000036063	ppp1r11	GO:0000164	protein phosphatase type 1 complex	IBA
ENSDARG00000036063	ppp1r11	GO:0008157	protein phosphatase 1 binding	IBA
ENSDARG00000036063	ppp1r11	GO:0032515	negative regulation of phosphoprotein phosphatase activity	IBA
ENSDARG00000036063	ppp1r11	GO:0004865	protein serine/threonine phosphatase inhibitor activity	IEA
ENSDARG00000036063	ppp1r11	GO:0032515	negative regulation of phosphoprotein phosphatase activity	IEA
ENSDARG00000036063	ppp1r11	GO:0061630	ubiquitin protein ligase activity	ISS
ENSDARG00000036063	ppp1r11	GO:0050830	defense response to Gram-positive bacterium	ISS
ENSDARG00000036125	nitr13	GO:0016020	membrane	IEA
ENSDARG00000036125	nitr13	GO:0016021	integral component of membrane	IEA
ENSDARG00000036125	nitr13
ENSDARG00000036147	ano5b	GO:0016020	membrane	IEA
ENSDARG00000036147	ano5b	GO:0016021	integral component of membrane	IEA
ENSDARG00000036147	ano5b	GO:0046983	protein dimerization activity	IEA
ENSDARG00000036147	ano5b
ENSDARG00000036156	fnbp1a	GO:0006897	endocytosis	IEA
ENSDARG00000036375	cyfip2	GO:0003674	molecular_function	ND
ENSDARG00000036375	cyfip2	GO:0031290	retinal ganglion cell axon guidance	IMP
ENSDARG00000036375	cyfip2	GO:0010842	retina layer formation	IMP
ENSDARG00000036412	si:ch211-81a5.5
ENSDARG00000036415	glb1
ENSDARG00000036415	glb1	GO:0016787	hydrolase activity	IEA
ENSDARG00000036415	glb1	GO:0004553	hydrolase activity, hydrolyzing O-glycosyl compounds	IEA
ENSDARG00000036415	glb1	GO:0016798	hydrolase activity, acting on glycosyl bonds	IEA
ENSDARG00000036415	glb1	GO:0005975	carbohydrate metabolic process	IEA
ENSDARG00000036415	glb1	GO:0008152	metabolic process	IEA
ENSDARG00000036415	glb1	GO:0004565	beta-galactosidase activity	IEA
ENSDARG00000036415	glb1	GO:0004565	beta-galactosidase activity	IDA
ENSDARG00000036499	zgc:162171	GO:0003924	GTPase activity	IEA
ENSDARG00000036499	zgc:162171	GO:0005525	GTP binding	IEA
ENSDARG00000036499	zgc:162171	GO:0016192	vesicle-mediated transport	IEA
ENSDARG00000036499	zgc:162171	GO:0042470	melanosome	IBA
ENSDARG00000036499	zgc:162171	GO:0005794	Golgi apparatus	IEA
ENSDARG00000036499	zgc:162171	GO:0005739	mitochondrion	IBA
ENSDARG00000036499	zgc:162171	GO:0005802	trans-Golgi network	IEA
ENSDARG00000036499	zgc:162171	GO:0032438	melanosome organization	IBA
ENSDARG00000036499	zgc:162171	GO:0005802	trans-Golgi network	IBA
ENSDARG00000036499	zgc:162171	GO:0031982	vesicle	IEA
ENSDARG00000036558	col18a1a	GO:0005198	structural molecule activity	IEA
ENSDARG00000036558	col18a1a	GO:0007155	cell adhesion	IEA
ENSDARG00000036558	col18a1a	GO:0005581	collagen trimer	IEA
ENSDARG00000036558	col18a1a	GO:0031012	extracellular matrix	IEA
ENSDARG00000036558	col18a1a	GO:0001755	neural crest cell migration	IMP
ENSDARG00000036987	has2	GO:0016020	membrane	IEA
ENSDARG00000036987	has2	GO:0016021	integral component of membrane	IEA
ENSDARG00000036987	has2	GO:0005887	integral component of plasma membrane	IBA
ENSDARG00000036987	has2	GO:0005887	integral component of plasma membrane	IEA
ENSDARG00000036987	has2	GO:0007155	cell adhesion	IBA
ENSDARG00000036987	has2	GO:0008078	mesodermal cell migration	IMP
ENSDARG00000036987	has2	GO:0042074	cell migration involved in gastrulation	IMP
ENSDARG00000036987	has2	GO:0016020	membrane	NAS
ENSDARG00000036987	has2	GO:0001947	heart looping	IGI
ENSDARG00000036987	has2	GO:0001947	heart looping	IMP
ENSDARG00000036987	has2	GO:0035050	embryonic heart tube development	IMP
ENSDARG00000036987	has2	GO:0031101	fin regeneration	IMP
ENSDARG00000036987	has2	GO:0001756	somitogenesis	IMP
ENSDARG00000036987	has2	GO:0003181	atrioventricular valve morphogenesis	IMP
ENSDARG00000036987	has2	GO:0001568	blood vessel development	IGI
ENSDARG00000036987	has2	GO:0003171	atrioventricular valve development	IGI
ENSDARG00000036987	has2	GO:0003146	heart jogging	IGI
ENSDARG00000036987	has2	GO:0050501	hyaluronan synthase activity	IEA
ENSDARG00000036987	has2	GO:0050501	hyaluronan synthase activity	ISS
ENSDARG00000036987	has2	GO:0030213	hyaluronan biosynthetic process	IEA
ENSDARG00000036987	has2	GO:0030213	hyaluronan biosynthetic process	ISS
ENSDARG00000036987	has2	GO:0060030	dorsal convergence	IGI
ENSDARG00000036987	has2	GO:2000223	regulation of BMP signaling pathway involved in heart jogging	IMP
ENSDARG00000036987	has2	GO:0021535	cell migration in hindbrain	IMP
ENSDARG00000036987	has2	GO:0036302	atrioventricular canal development	IGI
ENSDARG00000036987	has2	GO:0050501	hyaluronan synthase activity	IBA
ENSDARG00000036987	has2	GO:0030213	hyaluronan biosynthetic process	IBA
ENSDARG00000036987	has2	GO:0045226	extracellular polysaccharide biosynthetic process	IBA
ENSDARG00000036987	has2	GO:0085029	extracellular matrix assembly	IBA
ENSDARG00000036987	has2	GO:0035810	positive regulation of urine volume	ISS
ENSDARG00000036987	has2	GO:0070295	renal water absorption	ISS
ENSDARG00000037040	cgrrf1	GO:0016020	membrane	IEA
ENSDARG00000037040	cgrrf1	GO:0016021	integral component of membrane	IEA
ENSDARG00000037199	zgc:101851
ENSDARG00000037245	trmo	GO:0008150	biological_process	ND
ENSDARG00000037245	trmo	GO:0005575	cellular_component	ND
ENSDARG00000037245	trmo	GO:0003674	molecular_function	ND
ENSDARG00000037390	gsg1l	GO:0005886	plasma membrane	IEA
ENSDARG00000037390	gsg1l	GO:0016020	membrane	IEA
ENSDARG00000037390	gsg1l	GO:0016021	integral component of membrane	IEA
ENSDARG00000037390	gsg1l	GO:0030054	cell junction	IEA
ENSDARG00000037390	gsg1l	GO:0045202	synapse	IEA
ENSDARG00000037390	gsg1l	GO:0008150	biological_process	ND
ENSDARG00000037390	gsg1l	GO:0003674	molecular_function	ND
ENSDARG00000037427	si:ch211-39a7.1	GO:0005216	ion channel activity	IEA
ENSDARG00000037427	si:ch211-39a7.1	GO:0005230	extracellular ligand-gated ion channel activity	IEA
ENSDARG00000037427	si:ch211-39a7.1	GO:0006810	transport	IEA
ENSDARG00000037427	si:ch211-39a7.1	GO:0006811	ion transport	IEA
ENSDARG00000037427	si:ch211-39a7.1	GO:0034220	ion transmembrane transport	IEA
ENSDARG00000037427	si:ch211-39a7.1	GO:0005886	plasma membrane	IEA
ENSDARG00000037427	si:ch211-39a7.1	GO:0016020	membrane	IEA
ENSDARG00000037427	si:ch211-39a7.1	GO:0016021	integral component of membrane	IEA
ENSDARG00000037427	si:ch211-39a7.1	GO:0030054	cell junction	IEA
ENSDARG00000037427	si:ch211-39a7.1	GO:0045202	synapse	IEA
ENSDARG00000037427	si:ch211-39a7.1	GO:0055085	transmembrane transport	IEA
ENSDARG00000037427	si:ch211-39a7.1	GO:0060079	excitatory postsynaptic potential	IEA
ENSDARG00000037427	si:ch211-39a7.1	GO:0060078	regulation of postsynaptic membrane potential	IEA
ENSDARG00000037427	si:ch211-39a7.1	GO:0022848	acetylcholine-gated cation-selective channel activity	IEA
ENSDARG00000037427	si:ch211-39a7.1	GO:0045211	postsynaptic membrane	IEA
ENSDARG00000037427	si:ch211-39a7.1
ENSDARG00000037598	prf1.5	GO:0005509	calcium ion binding	IEA
ENSDARG00000037598	prf1.5	GO:0019835	cytolysis	IEA
ENSDARG00000037804	phlda3	GO:0005886	plasma membrane	ISS
ENSDARG00000037804	phlda3	GO:0016020	membrane	IEA
ENSDARG00000037804	phlda3	GO:0005737	cytoplasm	IEA
ENSDARG00000037804	phlda3	GO:0006915	apoptotic process	IEA
ENSDARG00000037804	phlda3	GO:0042771	intrinsic apoptotic signaling pathway in response to DNA damage by p53 class mediator	ISS
ENSDARG00000037804	phlda3	GO:0005546	phosphatidylinositol-4,5-bisphosphate binding	ISS
ENSDARG00000037804	phlda3	GO:0043065	positive regulation of apoptotic process	ISS
ENSDARG00000037804	phlda3	GO:0080025	phosphatidylinositol-3,5-bisphosphate binding	ISS
ENSDARG00000037804	phlda3	GO:0010314	phosphatidylinositol-5-phosphate binding	ISS
ENSDARG00000037804	phlda3	GO:0032266	phosphatidylinositol-3-phosphate binding	ISS
ENSDARG00000037804	phlda3	GO:0005547	phosphatidylinositol-3,4,5-trisphosphate binding	ISS
ENSDARG00000037804	phlda3	GO:0043325	phosphatidylinositol-3,4-bisphosphate binding	ISS
ENSDARG00000037804	phlda3	GO:0051898	negative regulation of protein kinase B signaling	ISS
ENSDARG00000037813	zgc:113278	GO:0006810	transport	IEA
ENSDARG00000037813	zgc:113278	GO:0016020	membrane	IEA
ENSDARG00000037813	zgc:113278	GO:0016021	integral component of membrane	IEA
ENSDARG00000037813	zgc:113278	GO:0003674	molecular_function	ND
ENSDARG00000037813	zgc:113278	GO:0015031	protein transport	IEA
ENSDARG00000037954	tnnt1	GO:0006937	regulation of muscle contraction	IEA
ENSDARG00000037954	tnnt1	GO:0005861	troponin complex	IEA
ENSDARG00000037954	tnnt1
ENSDARG00000037963	nek6	GO:0000166	nucleotide binding	IEA
ENSDARG00000037963	nek6	GO:0005524	ATP binding	IEA
ENSDARG00000037963	nek6	GO:0004672	protein kinase activity	IEA
ENSDARG00000037963	nek6	GO:0006468	protein phosphorylation	IEA
ENSDARG00000037963	nek6	GO:0004674	protein serine/threonine kinase activity	IEA
ENSDARG00000037968	fus	GO:0003676	nucleic acid binding	IEA
ENSDARG00000037968	fus	GO:0006355	regulation of transcription, DNA-templated	IEA
ENSDARG00000037968	fus	GO:0046872	metal ion binding	IEA
ENSDARG00000037968	fus	GO:0003723	RNA binding	IEA
ENSDARG00000037968	fus	GO:0048675	axon extension	IMP
ENSDARG00000037968	fus
ENSDARG00000038069	mgat3a	GO:0016020	membrane	IEA
ENSDARG00000038069	mgat3a	GO:0003830	beta-1,4-mannosylglycoprotein 4-beta-N-acetylglucosaminyltransferase activity	IEA
ENSDARG00000038069	mgat3a	GO:0006487	protein N-linked glycosylation	IEA
ENSDARG00000038302	ccar2	GO:0006355	regulation of transcription, DNA-templated	IEA
ENSDARG00000038302	ccar2	GO:0008380	RNA splicing	IEA
ENSDARG00000038302	ccar2	GO:0043065	positive regulation of apoptotic process	IEA
ENSDARG00000038302	ccar2	GO:0044609	DBIRD complex	IEA
ENSDARG00000038609	mpz	GO:0016020	membrane	IEA
ENSDARG00000038609	mpz	GO:0016021	integral component of membrane	IEA
ENSDARG00000038609	mpz	GO:0005887	integral component of plasma membrane	IEA
ENSDARG00000038609	mpz	GO:0043209	myelin sheath	IDA
ENSDARG00000038609	mpz	GO:0043209	myelin sheath	IEA
ENSDARG00000038609	mpz
ENSDARG00000038658	cavin4a
ENSDARG00000038770	zgc:103625
ENSDARG00000038788	dnai1.2
ENSDARG00000038788	dnai1.2	GO:0008574	ATP-dependent microtubule motor activity, plus-end-directed	IBA
ENSDARG00000038788	dnai1.2	GO:0045503	dynein light chain binding	IBA
ENSDARG00000038788	dnai1.2	GO:0045504	dynein heavy chain binding	IBA
ENSDARG00000038788	dnai1.2	GO:0003341	cilium movement	IBA
ENSDARG00000038788	dnai1.2	GO:0036158	outer dynein arm assembly	IBA
ENSDARG00000038788	dnai1.2	GO:0036157	outer dynein arm	IBA
ENSDARG00000038814	myrip
ENSDARG00000038814	myrip	GO:0005622	intracellular	IEA
ENSDARG00000038814	myrip	GO:0006886	intracellular protein transport	IEA
ENSDARG00000038814	myrip	GO:0017137	Rab GTPase binding	IEA
ENSDARG00000038814	myrip	GO:0046872	metal ion binding	IEA
ENSDARG00000038814	myrip	GO:0005737	cytoplasm	IEA
ENSDARG00000038814	myrip	GO:0005515	protein binding	IPI
ENSDARG00000038814	myrip	GO:0003779	actin binding	IBA
ENSDARG00000038814	myrip	GO:0030864	cortical actin cytoskeleton	IBA
ENSDARG00000038814	myrip	GO:0031410	cytoplasmic vesicle	IEA
ENSDARG00000038814	myrip	GO:0017137	Rab GTPase binding	IBA
ENSDARG00000038814	myrip	GO:0030133	transport vesicle	IEA
ENSDARG00000038814	myrip	GO:0048471	perinuclear region of cytoplasm	IEA
ENSDARG00000038814	myrip	GO:0017022	myosin binding	IBA
ENSDARG00000038814	myrip	GO:0030050	vesicle transport along actin filament	IBA
ENSDARG00000039131	atp1a1a.3	GO:0006810	transport	IEA
ENSDARG00000039131	atp1a1a.3	GO:0006811	ion transport	IEA
ENSDARG00000039131	atp1a1a.3	GO:0016020	membrane	IEA
ENSDARG00000039131	atp1a1a.3	GO:0016021	integral component of membrane	IEA
ENSDARG00000039131	atp1a1a.3	GO:0000166	nucleotide binding	IEA
ENSDARG00000039131	atp1a1a.3	GO:0005524	ATP binding	IEA
ENSDARG00000039131	atp1a1a.3	GO:0046872	metal ion binding	IEA
ENSDARG00000039131	atp1a1a.3	GO:0016787	hydrolase activity	IEA
ENSDARG00000039131	atp1a1a.3	GO:0006814	sodium ion transport	IEA
ENSDARG00000039131	atp1a1a.3	GO:0006813	potassium ion transport	IEA
ENSDARG00000039131	atp1a1a.3	GO:0005391	sodium:potassium-exchanging ATPase activity	IEA
ENSDARG00000039131	atp1a1a.3	GO:0010248	establishment or maintenance of transmembrane electrochemical gradient	IEA
ENSDARG00000039241	prkca	GO:0016740	transferase activity	IEA
ENSDARG00000039241	prkca	GO:0000166	nucleotide binding	IEA
ENSDARG00000039241	prkca	GO:0005524	ATP binding	IEA
ENSDARG00000039241	prkca	GO:0046872	metal ion binding	IEA
ENSDARG00000039241	prkca	GO:0004672	protein kinase activity	IEA
ENSDARG00000039241	prkca	GO:0004674	protein serine/threonine kinase activity	IEA
ENSDARG00000039241	prkca	GO:0004674	protein serine/threonine kinase activity	IBA
[truncated: 3,690 more rows]
