# Supplementary material for: Evolutionarily novel genes are expressed in transgenic fish tumors and their orthologs are involved in development of progressive traits in humans
Source: Infect Agent Cancer. 2019 Dec 5;14:46. doi: 10.1186/s13027-019-0262-5 (PMC6896781; doi:10.1186/s13027-019-0262-5)
Supplement: Supplementary file 12 — Additional file 12. GO annotation with all evidence codes for the 113 fishevolutionary novel genes without human orthologs. [file 13027_2019_262_MOESM12_ESM.xls]

## Sheet: Лист1
GO annotation with all evidence codes for 113 fish TTregEEN genes without human orthologs
Gene stable ID	Gene name	GO term accession	GO term name	GO term evidence code
ENSDARG00000001463	tdh2	GO:0005575	cellular_component	ND
ENSDARG00000001463	tdh2	GO:0003824	catalytic activity	IEA
ENSDARG00000001463	tdh2	GO:0050662	coenzyme binding	IEA
ENSDARG00000001463	tdh2
ENSDARG00000004256	wnt11	GO:0005576	extracellular region	IEA
ENSDARG00000004256	wnt11	GO:0007275	multicellular organism development	IEA
ENSDARG00000004256	wnt11	GO:0016055	Wnt signaling pathway	IEA
ENSDARG00000004256	wnt11	GO:0005578	proteinaceous extracellular matrix	IEA
ENSDARG00000004256	wnt11	GO:0005102	receptor binding	IEA
ENSDARG00000007655	crybb1l3	GO:0008150	biological_process	ND
ENSDARG00000007655	crybb1l3	GO:0005575	cellular_component	ND
ENSDARG00000007655	crybb1l3	GO:0003674	molecular_function	ND
ENSDARG00000009466	rgs9bp	GO:0016020	membrane	IEA
ENSDARG00000009466	rgs9bp	GO:0016021	integral component of membrane	IEA
ENSDARG00000010018	qki2
ENSDARG00000010018	qki2	GO:0006810	transport	IEA
ENSDARG00000010018	qki2	GO:0003676	nucleic acid binding	IEA
ENSDARG00000010018	qki2	GO:0003723	RNA binding	IEA
ENSDARG00000010018	qki2	GO:0005737	cytoplasm	IEA
ENSDARG00000010018	qki2	GO:0005634	nucleus	IEA
ENSDARG00000010018	qki2	GO:0007275	multicellular organism development	IEA
ENSDARG00000010018	qki2	GO:0030154	cell differentiation	IEA
ENSDARG00000010018	qki2	GO:0006417	regulation of translation	IEA
ENSDARG00000010018	qki2	GO:0006397	mRNA processing	IEA
ENSDARG00000010018	qki2	GO:0008380	RNA splicing	IEA
ENSDARG00000010018	qki2	GO:0051028	mRNA transport	IEA
ENSDARG00000010018	qki2	GO:0017124	SH3 domain binding	IEA
ENSDARG00000010454	guca1a	GO:0005509	calcium ion binding	IEA
ENSDARG00000010454	guca1a	GO:0031284	positive regulation of guanylate cyclase activity	IEA
ENSDARG00000010454	guca1a	GO:0005509	calcium ion binding	IDA
ENSDARG00000010454	guca1a	GO:0005509	calcium ion binding	ISS
ENSDARG00000010454	guca1a	GO:0008048	calcium sensitive guanylate cyclase activator activity	IDA
ENSDARG00000010454	guca1a	GO:0030250	guanylate cyclase activator activity	ISS
ENSDARG00000010977	rab34b	GO:0003924	GTPase activity	IEA
ENSDARG00000010977	rab34b	GO:0005525	GTP binding	IEA
ENSDARG00000010977	rab34b
ENSDARG00000012126	zgc:109965	GO:0016020	membrane	IEA
ENSDARG00000012126	zgc:109965	GO:0016021	integral component of membrane	IEA
ENSDARG00000012126	zgc:109965	GO:0005789	endoplasmic reticulum membrane	IBA
ENSDARG00000012126	zgc:109965	GO:0009966	regulation of signal transduction	IEA
ENSDARG00000012126	zgc:109965	GO:0009966	regulation of signal transduction	IBA
ENSDARG00000017038	zgc:152670	GO:0016491	oxidoreductase activity	IEA
ENSDARG00000017038	zgc:152670	GO:0055114	oxidation-reduction process	IEA
ENSDARG00000017038	zgc:152670	GO:0005506	iron ion binding	IEA
ENSDARG00000017038	zgc:152670	GO:0016705	oxidoreductase activity, acting on paired donors, with incorporation or reduction of molecular oxygen	IEA
ENSDARG00000017038	zgc:152670	GO:0005783	endoplasmic reticulum	IEA
ENSDARG00000017038	zgc:152670	GO:0031418	L-ascorbic acid binding	IEA
ENSDARG00000017038	zgc:152670	GO:0016702	oxidoreductase activity, acting on single donors with incorporation of molecular oxygen, incorporation of two atoms of oxygen	IEA
ENSDARG00000017038	zgc:152670	GO:0004656	procollagen-proline 4-dioxygenase activity	IEA
ENSDARG00000017038	zgc:152670	GO:0019511	peptidyl-proline hydroxylation	IEA
ENSDARG00000017038	zgc:152670
ENSDARG00000017354	epha2a	GO:0016740	transferase activity	IEA
ENSDARG00000017354	epha2a	GO:0016020	membrane	IEA
ENSDARG00000017354	epha2a	GO:0016021	integral component of membrane	IEA
ENSDARG00000017354	epha2a	GO:0000166	nucleotide binding	IEA
ENSDARG00000017354	epha2a	GO:0005524	ATP binding	IEA
ENSDARG00000017354	epha2a	GO:0004672	protein kinase activity	IEA
ENSDARG00000017354	epha2a	GO:0006468	protein phosphorylation	IEA
ENSDARG00000017354	epha2a	GO:0004713	protein tyrosine kinase activity	IEA
ENSDARG00000017354	epha2a	GO:0016301	kinase activity	IEA
ENSDARG00000017354	epha2a	GO:0007169	transmembrane receptor protein tyrosine kinase signaling pathway	IEA
ENSDARG00000017354	epha2a	GO:0016310	phosphorylation	IEA
ENSDARG00000017354	epha2a	GO:0018108	peptidyl-tyrosine phosphorylation	IEA
ENSDARG00000017354	epha2a	GO:0005887	integral component of plasma membrane	IEA
ENSDARG00000017354	epha2a	GO:0005003	ephrin receptor activity	IEA
ENSDARG00000017354	epha2a	GO:0048013	ephrin receptor signaling pathway	IEA
ENSDARG00000017354	epha2a
ENSDARG00000020122	endou2	GO:0090502	RNA phosphodiester bond hydrolysis, endonucleolytic	IEA
ENSDARG00000020122	endou2	GO:0004521	endoribonuclease activity	IEA
ENSDARG00000020122	endou2
ENSDARG00000022512	zgc:109913
ENSDARG00000026313	adgre5a	GO:0005509	calcium ion binding	IEA
ENSDARG00000027279	numb	GO:0005737	cytoplasm	IDA
ENSDARG00000027279	numb	GO:0016323	basolateral plasma membrane	IDA
ENSDARG00000027279	numb	GO:0005886	plasma membrane	IDA
ENSDARG00000027279	numb	GO:0060319	primitive erythrocyte differentiation	IGI
ENSDARG00000027279	numb	GO:0060319	primitive erythrocyte differentiation	IMP
ENSDARG00000029544	id2b	GO:0046983	protein dimerization activity	IEA
ENSDARG00000029544	id2b	GO:0005634	nucleus	IEA
ENSDARG00000029544	id2b	GO:0005737	cytoplasm	IEA
ENSDARG00000029544	id2b	GO:0045892	negative regulation of transcription, DNA-templated	IEA
ENSDARG00000033380	gyg2	GO:0016740	transferase activity	IEA
ENSDARG00000033380	gyg2	GO:0016757	transferase activity, transferring glycosyl groups	IEA
ENSDARG00000033380	gyg2	GO:0005575	cellular_component	ND
ENSDARG00000033380	gyg2
ENSDARG00000035609	mtnr1c	GO:0016020	membrane	IEA
ENSDARG00000035609	mtnr1c	GO:0016021	integral component of membrane	IEA
ENSDARG00000035609	mtnr1c	GO:0004871	signal transducer activity	IEA
ENSDARG00000035609	mtnr1c	GO:0004930	G-protein coupled receptor activity	IEA
ENSDARG00000035609	mtnr1c	GO:0007165	signal transduction	IEA
ENSDARG00000035609	mtnr1c	GO:0007186	G-protein coupled receptor signaling pathway	IEA
ENSDARG00000035609	mtnr1c	GO:0008502	melatonin receptor activity	IEA
ENSDARG00000035694	stm	GO:0005576	extracellular region	IEA
ENSDARG00000035694	stm	GO:0043049	otic placode formation	IEP
ENSDARG00000035694	stm	GO:0009590	detection of gravity	IMP
ENSDARG00000035694	stm
ENSDARG00000036125	nitr13	GO:0016020	membrane	IEA
ENSDARG00000036125	nitr13	GO:0016021	integral component of membrane	IEA
ENSDARG00000036125	nitr13
ENSDARG00000039871	rpz4	GO:0008150	biological_process	ND
ENSDARG00000039871	rpz4	GO:0005575	cellular_component	ND
ENSDARG00000039871	rpz4	GO:0003674	molecular_function	ND
ENSDARG00000040487	zgc:113176	GO:0003677	DNA binding	IEA
ENSDARG00000040487	zgc:113176	GO:0005634	nucleus	IEA
ENSDARG00000040487	zgc:113176	GO:0006351	transcription, DNA-templated	IEA
ENSDARG00000040487	zgc:113176	GO:0006355	regulation of transcription, DNA-templated	IEA
ENSDARG00000041919	ccl38.1	GO:0005576	extracellular region	IEA
ENSDARG00000041919	ccl38.1	GO:0005615	extracellular space	IEA
ENSDARG00000041919	ccl38.1	GO:0008009	chemokine activity	IEA
ENSDARG00000041919	ccl38.1	GO:0006955	immune response	IEA
ENSDARG00000041919	ccl38.1	GO:0060326	cell chemotaxis	IEA
ENSDARG00000041919	ccl38.1	GO:0005125	cytokine activity	IEA
ENSDARG00000041919	ccl38.1	GO:0006935	chemotaxis	IEA
ENSDARG00000041919	ccl38.1	GO:0010469	regulation of receptor activity	IEA
ENSDARG00000041919	ccl38.1	GO:0005615	extracellular space	IBA
ENSDARG00000041919	ccl38.1	GO:0008009	chemokine activity	IBA
ENSDARG00000041919	ccl38.1	GO:0048020	CCR chemokine receptor binding	IBA
ENSDARG00000041919	ccl38.1	GO:0002548	monocyte chemotaxis	IBA
ENSDARG00000041919	ccl38.1	GO:0006954	inflammatory response	IBA
ENSDARG00000041919	ccl38.1	GO:0007186	G-protein coupled receptor signaling pathway	IBA
ENSDARG00000041919	ccl38.1	GO:0030593	neutrophil chemotaxis	IBA
ENSDARG00000041919	ccl38.1	GO:0043547	positive regulation of GTPase activity	IBA
ENSDARG00000041919	ccl38.1	GO:0048247	lymphocyte chemotaxis	IBA
ENSDARG00000041919	ccl38.1	GO:0070098	chemokine-mediated signaling pathway	IBA
ENSDARG00000041919	ccl38.1	GO:0070374	positive regulation of ERK1 and ERK2 cascade	IBA
ENSDARG00000041919	ccl38.1	GO:0071346	cellular response to interferon-gamma	IBA
ENSDARG00000041919	ccl38.1	GO:0071347	cellular response to interleukin-1	IBA
ENSDARG00000041919	ccl38.1	GO:0071356	cellular response to tumor necrosis factor	IBA
ENSDARG00000042521		GO:0006810	transport	IEA
ENSDARG00000042521		GO:0016020	membrane	IEA
ENSDARG00000042521		GO:0016021	integral component of membrane	IEA
ENSDARG00000042521		GO:0055085	transmembrane transport	IEA
ENSDARG00000042521		GO:0016021	integral component of membrane	IBA
ENSDARG00000042521		GO:0005743	mitochondrial inner membrane	IBA
ENSDARG00000042521		GO:0022857	transmembrane transporter activity	IEA
ENSDARG00000042521		GO:0005743	mitochondrial inner membrane	IEA
ENSDARG00000042521		GO:0015866	ADP transport	IEA
ENSDARG00000042521		GO:0015867	ATP transport	IEA
ENSDARG00000042521		GO:0005471	ATP:ADP antiporter activity	IBA
ENSDARG00000042521		GO:0046902	regulation of mitochondrial membrane permeability	IBA
ENSDARG00000042521
ENSDARG00000042683	si:dkey-15j16.3	GO:0016020	membrane	IEA
ENSDARG00000042683	si:dkey-15j16.3	GO:0016021	integral component of membrane	IEA
ENSDARG00000042683	si:dkey-15j16.3	GO:0005887	integral component of plasma membrane	IBA
ENSDARG00000042683	si:dkey-15j16.3	GO:0005102	receptor binding	IBA
ENSDARG00000042683	si:dkey-15j16.3	GO:0004872	receptor activity	IBA
ENSDARG00000042683	si:dkey-15j16.3	GO:0042803	protein homodimerization activity	IBA
ENSDARG00000042683	si:dkey-15j16.3	GO:0050839	cell adhesion molecule binding	IBA
ENSDARG00000042683	si:dkey-15j16.3	GO:0007156	homophilic cell adhesion via plasma membrane adhesion molecules	IBA
ENSDARG00000042683	si:dkey-15j16.3	GO:0007157	heterophilic cell-cell adhesion via plasma membrane cell adhesion molecules	IBA
ENSDARG00000042683	si:dkey-15j16.3	GO:0008037	cell recognition	IBA
ENSDARG00000042683	si:dkey-15j16.3	GO:0005913	cell-cell adherens junction	IBA
ENSDARG00000042972	zgc:136605	GO:0016020	membrane	IEA
ENSDARG00000042972	zgc:136605	GO:0016021	integral component of membrane	IEA
ENSDARG00000042972	zgc:136605	GO:0008150	biological_process	ND
ENSDARG00000042972	zgc:136605	GO:0003674	molecular_function	ND
ENSDARG00000042972	zgc:136605	GO:0016021	integral component of membrane	IBA
ENSDARG00000042972	zgc:136605	GO:0005789	endoplasmic reticulum membrane	IBA
ENSDARG00000043141	si:ch211-132f19.7	GO:0016020	membrane	IEA
ENSDARG00000043141	si:ch211-132f19.7	GO:0016021	integral component of membrane	IEA
ENSDARG00000043141	si:ch211-132f19.7	GO:0000166	nucleotide binding	IEA
ENSDARG00000043141	si:ch211-132f19.7	GO:0005622	intracellular	IEA
ENSDARG00000043141	si:ch211-132f19.7	GO:0035556	intracellular signal transduction	IEA
ENSDARG00000043141	si:ch211-132f19.7	GO:0016829	lyase activity	IEA
ENSDARG00000043141	si:ch211-132f19.7	GO:0016849	phosphorus-oxygen lyase activity	IEA
ENSDARG00000043141	si:ch211-132f19.7	GO:0009190	cyclic nucleotide biosynthetic process	IEA
ENSDARG00000043141	si:ch211-132f19.7	GO:0005886	plasma membrane	IEA
ENSDARG00000043141	si:ch211-132f19.7	GO:0004016	adenylate cyclase activity	IEA
ENSDARG00000043141	si:ch211-132f19.7	GO:0006171	cAMP biosynthetic process	IEA
ENSDARG00000043141	si:ch211-132f19.7	GO:0007165	signal transduction	IBA
ENSDARG00000043141	si:ch211-132f19.7	GO:0004383	guanylate cyclase activity	IBA
ENSDARG00000043141	si:ch211-132f19.7	GO:0006182	cGMP biosynthetic process	IBA
ENSDARG00000043141	si:ch211-132f19.7	GO:0005886	plasma membrane	IBA
ENSDARG00000043141	si:ch211-132f19.7	GO:0008074	guanylate cyclase complex, soluble	IBA
ENSDARG00000044276	spp1	GO:0005615	extracellular space	IBA
ENSDARG00000044276	spp1	GO:0007155	cell adhesion	IEA
ENSDARG00000044276	spp1	GO:0007155	cell adhesion	IBA
ENSDARG00000044276	spp1	GO:0001503	ossification	IEA
ENSDARG00000044276	spp1	GO:0060348	bone development	IMP
ENSDARG00000044276	spp1	GO:0050840	extracellular matrix binding	IBA
ENSDARG00000044276	spp1	GO:0001649	osteoblast differentiation	IBA
ENSDARG00000044276	spp1	GO:0045780	positive regulation of bone resorption	IBA
ENSDARG00000044280	opn1mw2	GO:0016020	membrane	IEA
ENSDARG00000044280	opn1mw2	GO:0016021	integral component of membrane	IEA
ENSDARG00000044280	opn1mw2	GO:0004871	signal transducer activity	IEA
ENSDARG00000044280	opn1mw2	GO:0004930	G-protein coupled receptor activity	IEA
ENSDARG00000044280	opn1mw2	GO:0007165	signal transduction	IEA
ENSDARG00000044280	opn1mw2	GO:0007186	G-protein coupled receptor signaling pathway	IEA
ENSDARG00000044280	opn1mw2	GO:0050896	response to stimulus	IEA
ENSDARG00000044280	opn1mw2	GO:0007601	visual perception	IEA
ENSDARG00000044280	opn1mw2	GO:0007602	phototransduction	IEA
ENSDARG00000044280	opn1mw2	GO:0009881	photoreceptor activity	IEA
ENSDARG00000044280	opn1mw2	GO:0018298	protein-chromophore linkage	IEA
ENSDARG00000045586	zgc:172145	GO:0046872	metal ion binding	IEA
ENSDARG00000045586	zgc:172145	GO:0005737	cytoplasm	IBA
ENSDARG00000045586	zgc:172145	GO:0008199	ferric iron binding	IEA
ENSDARG00000045586	zgc:172145	GO:0006826	iron ion transport	IEA
ENSDARG00000045586	zgc:172145	GO:0006879	cellular iron ion homeostasis	IEA
ENSDARG00000045586	zgc:172145	GO:0005506	iron ion binding	IBA
ENSDARG00000045586	zgc:172145	GO:0006880	intracellular sequestering of iron ion	IBA
ENSDARG00000045842	zgc:113263	GO:0005575	cellular_component	ND
ENSDARG00000045842	zgc:113263	GO:0005515	protein binding	IPI
ENSDARG00000052413	crfb12	GO:0016020	membrane	IEA
ENSDARG00000052413	crfb12	GO:0016021	integral component of membrane	IEA
ENSDARG00000052731	ankrd31	GO:0008150	biological_process	ND
ENSDARG00000052731	ankrd31	GO:0005575	cellular_component	ND
ENSDARG00000052731	ankrd31	GO:0003674	molecular_function	ND
ENSDARG00000053260	zgc:113090	GO:0003676	nucleic acid binding	IEA
ENSDARG00000053570	AL590151.1
ENSDARG00000054878	six2b	GO:0006355	regulation of transcription, DNA-templated	IEA
ENSDARG00000054878	six2b	GO:0003677	DNA binding	IEA
ENSDARG00000054878	six2b	GO:0005634	nucleus	IEA
ENSDARG00000054878	six2b	GO:0043565	sequence-specific DNA binding	IEA
ENSDARG00000055731	si:dkeyp-69e1.8	GO:0005525	GTP binding	IEA
ENSDARG00000055731	si:dkeyp-69e1.8	GO:0016020	membrane	IEA
ENSDARG00000055731	si:dkeyp-69e1.8	GO:0016021	integral component of membrane	IEA
ENSDARG00000056004	sprn	GO:0005886	plasma membrane	IEA
ENSDARG00000056004	sprn	GO:0016020	membrane	IEA
ENSDARG00000056004	sprn	GO:0003674	molecular_function	ND
ENSDARG00000056004	sprn	GO:0031225	anchored component of membrane	IEA
ENSDARG00000057590	si:ch1073-396h14.1	GO:0006508	proteolysis	IEA
ENSDARG00000057590	si:ch1073-396h14.1	GO:0004222	metalloendopeptidase activity	IEA
ENSDARG00000057590	si:ch1073-396h14.1	GO:0008237	metallopeptidase activity	IEA
ENSDARG00000057590	si:ch1073-396h14.1	GO:0016020	membrane	IEA
ENSDARG00000057590	si:ch1073-396h14.1	GO:0016021	integral component of membrane	IEA
ENSDARG00000057590	si:ch1073-396h14.1	GO:0046872	metal ion binding	IEA
ENSDARG00000058673	nkl.2	GO:0005737	cytoplasm	IBA
ENSDARG00000058673	nkl.2	GO:0006629	lipid metabolic process	IEA
ENSDARG00000058673	nkl.2	GO:0001664	G-protein coupled receptor binding	IBA
ENSDARG00000058673	nkl.2	GO:0043085	positive regulation of catalytic activity	IEA
ENSDARG00000058673	nkl.2	GO:0008047	enzyme activator activity	IBA
ENSDARG00000067729	arid3c	GO:0003677	DNA binding	IEA
ENSDARG00000067729	arid3c	GO:0005634	nucleus	IBA
ENSDARG00000067729	arid3c	GO:0005737	cytoplasm	IEA
ENSDARG00000067729	arid3c	GO:0005634	nucleus	IEA
ENSDARG00000067729	arid3c	GO:0006351	transcription, DNA-templated	IEA
ENSDARG00000067729	arid3c	GO:0006355	regulation of transcription, DNA-templated	IEA
ENSDARG00000067729	arid3c	GO:0006366	transcription from RNA polymerase II promoter	IEA
ENSDARG00000067729	arid3c	GO:0000977	RNA polymerase II regulatory region sequence-specific DNA binding	IBA
ENSDARG00000067729	arid3c	GO:0001228	transcriptional activator activity, RNA polymerase II transcription regulatory region sequence-specific binding	IBA
ENSDARG00000067729	arid3c	GO:0045944	positive regulation of transcription from RNA polymerase II promoter	IEA
ENSDARG00000067729	arid3c
ENSDARG00000068374	si:ch211-132b12.7	GO:0045892	negative regulation of transcription, DNA-templated	IEA
ENSDARG00000068374	si:ch211-132b12.7	GO:0042754	negative regulation of circadian rhythm	IEA
ENSDARG00000068742	CR384085.1
ENSDARG00000069211	taar14i	GO:0016020	membrane	IEA
ENSDARG00000069211	taar14i	GO:0016021	integral component of membrane	IEA
ENSDARG00000069211	taar14i	GO:0004871	signal transducer activity	IEA
ENSDARG00000069211	taar14i	GO:0004930	G-protein coupled receptor activity	IEA
ENSDARG00000069211	taar14i	GO:0007165	signal transduction	IEA
ENSDARG00000069211	taar14i	GO:0007186	G-protein coupled receptor signaling pathway	IEA
ENSDARG00000069211	taar14i	GO:0001594	trace-amine receptor activity	IBA
ENSDARG00000069327	nkx3.3	GO:0006355	regulation of transcription, DNA-templated	IEA
ENSDARG00000069327	nkx3.3	GO:0003677	DNA binding	IEA
ENSDARG00000069327	nkx3.3	GO:0005634	nucleus	IEA
ENSDARG00000069327	nkx3.3	GO:0043565	sequence-specific DNA binding	IEA
ENSDARG00000069481	ghrh	GO:0005576	extracellular region	IEA
ENSDARG00000069481	ghrh	GO:0005179	hormone activity	IEA
ENSDARG00000069481	ghrh	GO:0007165	signal transduction	IDA
ENSDARG00000069481	ghrh	GO:0016608	growth hormone-releasing hormone activity	IDA
ENSDARG00000069481	ghrh	GO:0010469	regulation of receptor activity	IEA
ENSDARG00000070141	si:ch211-191i18.2
ENSDARG00000070669	cxcr3.3	GO:0016020	membrane	IEA
ENSDARG00000070669	cxcr3.3	GO:0016021	integral component of membrane	IEA
ENSDARG00000070669	cxcr3.3	GO:0004930	G-protein coupled receptor activity	IEA
ENSDARG00000070669	cxcr3.3	GO:0007186	G-protein coupled receptor signaling pathway	IEA
ENSDARG00000070669	cxcr3.3	GO:0006954	inflammatory response	IEA
ENSDARG00000070669	cxcr3.3	GO:0006935	chemotaxis	IEA
ENSDARG00000070669	cxcr3.3	GO:0070098	chemokine-mediated signaling pathway	IEA
ENSDARG00000070669	cxcr3.3	GO:0016494	C-X-C chemokine receptor activity	IEA
ENSDARG00000070669	cxcr3.3	GO:0002685	regulation of leukocyte migration	IEA
ENSDARG00000070705	zgc:64022	GO:0016020	membrane	IEA
ENSDARG00000070705	zgc:64022	GO:0003924	GTPase activity	IEA
ENSDARG00000070705	zgc:64022	GO:0005525	GTP binding	IEA
ENSDARG00000070705	zgc:64022	GO:0000166	nucleotide binding	IEA
ENSDARG00000070705	zgc:64022	GO:0007165	signal transduction	IEA
ENSDARG00000071279	si:dkey-4c23.5
ENSDARG00000071389	si:dkey-78l4.6	GO:0004252	serine-type endopeptidase activity	IEA
ENSDARG00000071389	si:dkey-78l4.6	GO:0006508	proteolysis	IEA
ENSDARG00000071656	si:dkey-19a16.5	GO:0016020	membrane	IEA
ENSDARG00000071656	si:dkey-19a16.5	GO:0016021	integral component of membrane	IEA
ENSDARG00000071656	si:dkey-19a16.5	GO:0005102	receptor binding	IBA
ENSDARG00000071656	si:dkey-19a16.5	GO:0006955	immune response	IBA
ENSDARG00000071656	si:dkey-19a16.5	GO:0009986	cell surface	IBA
ENSDARG00000073771	tbc1d12b	GO:0005776	autophagosome	IBA
ENSDARG00000073771	tbc1d12b	GO:0005096	GTPase activator activity	IBA
ENSDARG00000073771	tbc1d12b	GO:0017137	Rab GTPase binding	IBA
ENSDARG00000073771	tbc1d12b	GO:0006886	intracellular protein transport	IBA
ENSDARG00000073771	tbc1d12b	GO:0031338	regulation of vesicle fusion	IBA
ENSDARG00000073771	tbc1d12b	GO:0090630	activation of GTPase activity	IBA
ENSDARG00000073771	tbc1d12b	GO:2000785	regulation of autophagosome assembly	IBA
ENSDARG00000073771	tbc1d12b	GO:0055037	recycling endosome	IBA
ENSDARG00000073848	arhgef7b	GO:0005622	intracellular	IEA
ENSDARG00000073848	arhgef7b	GO:0035556	intracellular signal transduction	IEA
ENSDARG00000073848	arhgef7b	GO:0005085	guanyl-nucleotide exchange factor activity	IEA
ENSDARG00000073848	arhgef7b	GO:0005089	Rho guanyl-nucleotide exchange factor activity	IEA
ENSDARG00000073848	arhgef7b	GO:0035023	regulation of Rho protein signal transduction	IEA
ENSDARG00000073848	arhgef7b	GO:0065009	regulation of molecular function	IEA
ENSDARG00000073848	arhgef7b	GO:0001525	angiogenesis	IMP
ENSDARG00000073848	arhgef7b	GO:0001568	blood vessel development	IMP
ENSDARG00000073848	arhgef7b	GO:0055113	epiboly involved in gastrulation with mouth forming second	IMP
ENSDARG00000073848	arhgef7b	GO:0001935	endothelial cell proliferation	IMP
ENSDARG00000073848	arhgef7b	GO:0071896	protein localization to adherens junction	IMP
ENSDARG00000073944	si:ch73-386h18.1	GO:0003676	nucleic acid binding	IEA
ENSDARG00000073944	si:ch73-386h18.1	GO:0006355	regulation of transcription, DNA-templated	IEA
ENSDARG00000073944	si:ch73-386h18.1	GO:0003677	DNA binding	IEA
ENSDARG00000073944	si:ch73-386h18.1	GO:0046872	metal ion binding	IEA
ENSDARG00000073944	si:ch73-386h18.1	GO:0005634	nucleus	IEA
ENSDARG00000073944	si:ch73-386h18.1	GO:0008270	zinc ion binding	IEA
ENSDARG00000073944	si:ch73-386h18.1	GO:0043565	sequence-specific DNA binding	IEA
ENSDARG00000073999	tapt1a	GO:0016020	membrane	IEA
ENSDARG00000073999	tapt1a	GO:0016021	integral component of membrane	IEA
ENSDARG00000074132	scpp7
ENSDARG00000074183	si:dkey-172j4.3	GO:0016740	transferase activity	IEA
ENSDARG00000074183	si:dkey-172j4.3	GO:0000166	nucleotide binding	IEA
ENSDARG00000074183	si:dkey-172j4.3	GO:0005524	ATP binding	IEA
ENSDARG00000074183	si:dkey-172j4.3	GO:0016301	kinase activity	IEA
ENSDARG00000074183	si:dkey-172j4.3	GO:0016310	phosphorylation	IEA
ENSDARG00000074183	si:dkey-172j4.3	GO:0005622	intracellular	IEA
ENSDARG00000074183	si:dkey-172j4.3	GO:0008152	metabolic process	IEA
ENSDARG00000074183	si:dkey-172j4.3	GO:0035556	intracellular signal transduction	IEA
ENSDARG00000074183	si:dkey-172j4.3	GO:0003951	NAD+ kinase activity	IEA
ENSDARG00000074183	si:dkey-172j4.3	GO:0004143	diacylglycerol kinase activity	IEA
ENSDARG00000074183	si:dkey-172j4.3	GO:0007205	protein kinase C-activating G-protein coupled receptor signaling pathway	IEA
ENSDARG00000074183	si:dkey-172j4.3
ENSDARG00000075045	cxcl18b	GO:0005576	extracellular region	IEA
ENSDARG00000075045	cxcl18b	GO:0005615	extracellular space	IBA
ENSDARG00000075045	cxcl18b	GO:0006955	immune response	IBA
ENSDARG00000075045	cxcl18b	GO:0008009	chemokine activity	IEA
ENSDARG00000075045	cxcl18b	GO:0006954	inflammatory response	IBA
ENSDARG00000075045	cxcl18b	GO:0006955	immune response	IEA
ENSDARG00000075045	cxcl18b	GO:0007186	G-protein coupled receptor signaling pathway	IBA
ENSDARG00000075045	cxcl18b	GO:0070098	chemokine-mediated signaling pathway	IBA
ENSDARG00000075045	cxcl18b	GO:0002690	positive regulation of leukocyte chemotaxis	IBA
ENSDARG00000075045	cxcl18b	GO:0032496	response to lipopolysaccharide	IBA
ENSDARG00000075045	cxcl18b	GO:0042127	regulation of cell proliferation	IBA
ENSDARG00000075045	cxcl18b	GO:0045236	CXCR chemokine receptor binding	IBA
ENSDARG00000075045	cxcl18b	GO:0008009	chemokine activity	IDA
ENSDARG00000075045	cxcl18b	GO:0051916	granulocyte colony-stimulating factor binding	IGI
ENSDARG00000075045	cxcl18b	GO:0071621	granulocyte chemotaxis	IDA
ENSDARG00000075996	si:dkey-103d23.5	GO:0003676	nucleic acid binding	IEA
ENSDARG00000075996	si:dkey-103d23.5	GO:0008270	zinc ion binding	IEA
ENSDARG00000076343	si:dkeyp-13d11.1
ENSDARG00000076557	bicc2	GO:0003676	nucleic acid binding	IEA
ENSDARG00000076557	bicc2	GO:0003723	RNA binding	IEA
ENSDARG00000077252	si:rp71-36a1.5
ENSDARG00000077252	si:rp71-36a1.5	GO:0016020	membrane	IEA
ENSDARG00000077252	si:rp71-36a1.5	GO:0016021	integral component of membrane	IEA
ENSDARG00000077557	nitr5	GO:0016020	membrane	IEA
ENSDARG00000077557	nitr5	GO:0016021	integral component of membrane	IEA
ENSDARG00000077998	nitr3a	GO:0016020	membrane	IEA
ENSDARG00000077998	nitr3a	GO:0016021	integral component of membrane	IEA
ENSDARG00000077998	nitr3a
ENSDARG00000079502	gal3st2	GO:0016020	membrane	IEA
ENSDARG00000079502	gal3st2	GO:0016021	integral component of membrane	IEA
ENSDARG00000079502	gal3st2	GO:0005794	Golgi apparatus	IEA
ENSDARG00000079502	gal3st2	GO:0001733	galactosylceramide sulfotransferase activity	IEA
ENSDARG00000079502	gal3st2	GO:0009247	glycolipid biosynthetic process	IEA
ENSDARG00000079791	si:ch211-176g6.2	GO:0007165	signal transduction	IEA
ENSDARG00000086052	si:ch211-106k21.5	GO:0005615	extracellular space	IBA
ENSDARG00000086052	si:ch211-106k21.5	GO:0005578	proteinaceous extracellular matrix	IBA
ENSDARG00000086052	si:ch211-106k21.5	GO:0007409	axonogenesis	IBA
ENSDARG00000086166	si:ch211-286b5.9	GO:0016020	membrane	IEA
ENSDARG00000086166	si:ch211-286b5.9	GO:0016021	integral component of membrane	IEA
ENSDARG00000086272	si:dkey-4p15.5
ENSDARG00000086383	or111-8	GO:0005886	plasma membrane	IEA
ENSDARG00000086383	or111-8	GO:0016020	membrane	IEA
ENSDARG00000086383	or111-8	GO:0016021	integral component of membrane	IEA
ENSDARG00000086383	or111-8	GO:0004871	signal transducer activity	IEA
ENSDARG00000086383	or111-8	GO:0004930	G-protein coupled receptor activity	IEA
ENSDARG00000086383	or111-8	GO:0007165	signal transduction	IEA
ENSDARG00000086383	or111-8	GO:0007186	G-protein coupled receptor signaling pathway	IEA
ENSDARG00000086383	or111-8	GO:0007186	G-protein coupled receptor signaling pathway	IBA
ENSDARG00000086383	or111-8	GO:0016021	integral component of membrane	IBA
ENSDARG00000086383	or111-8	GO:0004984	olfactory receptor activity	IEA
ENSDARG00000086383	or111-8	GO:0007608	sensory perception of smell	IEA
ENSDARG00000086383	or111-8	GO:0050896	response to stimulus	IEA
ENSDARG00000086383	or111-8	GO:0050911	detection of chemical stimulus involved in sensory perception of smell	IEA
ENSDARG00000086383	or111-8	GO:0004888	transmembrane signaling receptor activity	IBA
ENSDARG00000086383	or111-8	GO:0050907	detection of chemical stimulus involved in sensory perception	IBA
ENSDARG00000087453	si:ch73-57f22.2	GO:0003676	nucleic acid binding	IEA
ENSDARG00000088861	znf1021	GO:0003676	nucleic acid binding	IEA
ENSDARG00000089477	si:ch211-132g1.3
ENSDARG00000089477	si:ch211-132g1.3	GO:0016020	membrane	IEA
ENSDARG00000089477	si:ch211-132g1.3	GO:0016021	integral component of membrane	IEA
ENSDARG00000090973	si:dkey-264d12.1
ENSDARG00000091215	rpz2
ENSDARG00000091215	rpz2	GO:0016020	membrane	IEA
ENSDARG00000091215	rpz2	GO:0016021	integral component of membrane	IEA
ENSDARG00000091236	cst14b.2	GO:0005622	intracellular	IEA
ENSDARG00000091236	cst14b.2	GO:0010951	negative regulation of endopeptidase activity	IEA
ENSDARG00000091236	cst14b.2	GO:0004866	endopeptidase inhibitor activity	IEA
ENSDARG00000091584	si:ch73-217n20.1
ENSDARG00000091791	or111-5	GO:0005886	plasma membrane	IEA
ENSDARG00000091791	or111-5	GO:0016020	membrane	IEA
ENSDARG00000091791	or111-5	GO:0016021	integral component of membrane	IEA
ENSDARG00000091791	or111-5	GO:0004871	signal transducer activity	IEA
ENSDARG00000091791	or111-5	GO:0004930	G-protein coupled receptor activity	IEA
ENSDARG00000091791	or111-5	GO:0007165	signal transduction	IEA
ENSDARG00000091791	or111-5	GO:0007186	G-protein coupled receptor signaling pathway	IEA
ENSDARG00000091791	or111-5	GO:0007186	G-protein coupled receptor signaling pathway	IBA
ENSDARG00000091791	or111-5	GO:0016021	integral component of membrane	IBA
ENSDARG00000091791	or111-5	GO:0004984	olfactory receptor activity	IEA
ENSDARG00000091791	or111-5	GO:0007608	sensory perception of smell	IEA
ENSDARG00000091791	or111-5	GO:0050896	response to stimulus	IEA
ENSDARG00000091791	or111-5	GO:0050911	detection of chemical stimulus involved in sensory perception of smell	IEA
ENSDARG00000091791	or111-5	GO:0004888	transmembrane signaling receptor activity	IBA
ENSDARG00000091791	or111-5	GO:0050907	detection of chemical stimulus involved in sensory perception	IBA
ENSDARG00000091993	dicp1.1	GO:0016020	membrane	IEA
ENSDARG00000091993	dicp1.1	GO:0016021	integral component of membrane	IEA
ENSDARG00000092180	si:dkey-40m6.11	GO:0004674	protein serine/threonine kinase activity	IBA
ENSDARG00000092180	si:dkey-40m6.11	GO:0007346	regulation of mitotic cell cycle	IBA
ENSDARG00000092180	si:dkey-40m6.11	GO:0043066	negative regulation of apoptotic process	IBA
ENSDARG00000092180	si:dkey-40m6.11	GO:0046777	protein autophosphorylation	IBA
ENSDARG00000092180	si:dkey-40m6.11	GO:0005737	cytoplasm	IBA
ENSDARG00000092180	si:dkey-40m6.11	GO:0000166	nucleotide binding	IEA
ENSDARG00000092180	si:dkey-40m6.11	GO:0005524	ATP binding	IEA
ENSDARG00000092180	si:dkey-40m6.11	GO:0004672	protein kinase activity	IEA
ENSDARG00000092180	si:dkey-40m6.11	GO:0006468	protein phosphorylation	IEA
ENSDARG00000092180	si:dkey-40m6.11	GO:0004674	protein serine/threonine kinase activity	IEA
ENSDARG00000092240	si:ch211-243a20.3	GO:0000350	generation of catalytic spliceosome for second transesterification step	IEA
ENSDARG00000092489	si:ch73-103b9.2
ENSDARG00000092532	si:dkey-21e2.4	GO:0004252	serine-type endopeptidase activity	IEA
ENSDARG00000092532	si:dkey-21e2.4	GO:0006508	proteolysis	IEA
ENSDARG00000092532	si:dkey-21e2.4	GO:0016787	hydrolase activity	IEA
ENSDARG00000092532	si:dkey-21e2.4	GO:0008233	peptidase activity	IEA
ENSDARG00000092532	si:dkey-21e2.4	GO:0008236	serine-type peptidase activity	IEA
ENSDARG00000092567	si:dkey-61l1.4	GO:0005201	extracellular matrix structural constituent	IEA
ENSDARG00000093188	si:dkey-75a21.2
ENSDARG00000094224	si:dkey-219e20.2	GO:0007165	signal transduction	IEA
ENSDARG00000094224	si:dkey-219e20.2	GO:0005737	cytoplasm	IBA
ENSDARG00000094224	si:dkey-219e20.2	GO:0043087	regulation of GTPase activity	IBA
ENSDARG00000094491	si:ch211-202m22.1	GO:0005524	ATP binding	IEA
ENSDARG00000094491	si:ch211-202m22.1	GO:0004672	protein kinase activity	IEA
ENSDARG00000094491	si:ch211-202m22.1	GO:0004674	protein serine/threonine kinase activity	IEA
ENSDARG00000094491	si:ch211-202m22.1	GO:0006468	protein phosphorylation	IEA
ENSDARG00000094491	si:ch211-202m22.1	GO:0043066	negative regulation of apoptotic process	IEA
ENSDARG00000094491	si:ch211-202m22.1	GO:0004674	protein serine/threonine kinase activity	IBA
ENSDARG00000094491	si:ch211-202m22.1	GO:0007346	regulation of mitotic cell cycle	IBA
ENSDARG00000094491	si:ch211-202m22.1	GO:0043066	negative regulation of apoptotic process	IBA
ENSDARG00000094491	si:ch211-202m22.1	GO:0046777	protein autophosphorylation	IBA
ENSDARG00000094491	si:ch211-202m22.1	GO:0005737	cytoplasm	IBA
ENSDARG00000094540	si:dkey-96l17.6	GO:0000166	nucleotide binding	IEA
ENSDARG00000094540	si:dkey-96l17.6	GO:0005524	ATP binding	IEA
ENSDARG00000094540	si:dkey-96l17.6	GO:0007018	microtubule-based movement	IBA
ENSDARG00000094540	si:dkey-96l17.6	GO:0005871	kinesin complex	IBA
ENSDARG00000094540	si:dkey-96l17.6	GO:0008017	microtubule binding	IEA
ENSDARG00000094540	si:dkey-96l17.6	GO:0005874	microtubule	IEA
ENSDARG00000094540	si:dkey-96l17.6	GO:0003777	microtubule motor activity	IEA
ENSDARG00000094540	si:dkey-96l17.6	GO:0007018	microtubule-based movement	IEA
ENSDARG00000094540	si:dkey-96l17.6	GO:0003774	motor activity	IEA
ENSDARG00000094540	si:dkey-96l17.6	GO:0003777	microtubule motor activity	IBA
ENSDARG00000094540	si:dkey-96l17.6	GO:0016887	ATPase activity	IBA
ENSDARG00000095198	znf1132	GO:0003676	nucleic acid binding	IEA
ENSDARG00000095497	si:dkeyp-2e4.5	GO:0003676	nucleic acid binding	IEA
ENSDARG00000095772	si:dkey-11o1.2	GO:0016020	membrane	IEA
ENSDARG00000095772	si:dkey-11o1.2	GO:0016021	integral component of membrane	IEA
ENSDARG00000095853	si:ch211-57m13.3	GO:0004672	protein kinase activity	IEA
ENSDARG00000095853	si:ch211-57m13.3	GO:0004674	protein serine/threonine kinase activity	IBA
ENSDARG00000095853	si:ch211-57m13.3	GO:0005524	ATP binding	IEA
ENSDARG00000095853	si:ch211-57m13.3	GO:0006468	protein phosphorylation	IEA
ENSDARG00000095853	si:ch211-57m13.3	GO:0007346	regulation of mitotic cell cycle	IBA
ENSDARG00000095853	si:ch211-57m13.3	GO:0043066	negative regulation of apoptotic process	IBA
ENSDARG00000095853	si:ch211-57m13.3	GO:0046777	protein autophosphorylation	IBA
ENSDARG00000095853	si:ch211-57m13.3	GO:0005737	cytoplasm	IBA
ENSDARG00000095853	si:ch211-57m13.3	GO:0004674	protein serine/threonine kinase activity	IEA
ENSDARG00000095853	si:ch211-57m13.3	GO:0043066	negative regulation of apoptotic process	IEA
ENSDARG00000096034	si:ch73-289h5.5
ENSDARG00000096139	si:dkey-16b10.1
ENSDARG00000096139	si:dkey-16b10.1	GO:0003676	nucleic acid binding	IEA
ENSDARG00000096214	si:ch211-197k17.3
ENSDARG00000098196	znf1077	GO:0003676	nucleic acid binding	IEA
ENSDARG00000098196	znf1077	GO:0008150	biological_process	ND
ENSDARG00000098270	znf1053	GO:0003676	nucleic acid binding	IEA
ENSDARG00000098376	si:ch211-207l14.1
ENSDARG00000098689	ptpn23b
ENSDARG00000098800	znf1156
ENSDARG00000098800	znf1156	GO:0003676	nucleic acid binding	IEA
ENSDARG00000098800	znf1156	GO:0008150	biological_process	ND
ENSDARG00000099048	znf1070	GO:0003676	nucleic acid binding	IEA
ENSDARG00000099048	znf1070	GO:0008150	biological_process	ND
ENSDARG00000099048	znf1070
ENSDARG00000099101	gch2	GO:0005737	cytoplasm	IBA
ENSDARG00000099101	gch2	GO:0016787	hydrolase activity	IEA
ENSDARG00000099101	gch2	GO:0005737	cytoplasm	IEA
ENSDARG00000099101	gch2	GO:0008270	zinc ion binding	IBA
ENSDARG00000099101	gch2	GO:0005525	GTP binding	IBA
ENSDARG00000099101	gch2	GO:0003934	GTP cyclohydrolase I activity	IEA
ENSDARG00000099101	gch2	GO:0003934	GTP cyclohydrolase I activity	IBA
ENSDARG00000099101	gch2	GO:0006729	tetrahydrobiopterin biosynthetic process	IBA
ENSDARG00000099101	gch2	GO:0046654	tetrahydrofolate biosynthetic process	IEA
ENSDARG00000099609	tpbga	GO:0016020	membrane	IEA
ENSDARG00000099609	tpbga	GO:0016021	integral component of membrane	IEA
ENSDARG00000099609	tpbga	GO:0090090	negative regulation of canonical Wnt signaling pathway	IMP
ENSDARG00000099609	tpbga	GO:2000052	positive regulation of non-canonical Wnt signaling pathway	IMP
ENSDARG00000100652	znf1147	GO:0003676	nucleic acid binding	IEA
ENSDARG00000100652	znf1147	GO:0008150	biological_process	ND
ENSDARG00000102225	si:ch211-205a14.7
ENSDARG00000103498	epd	GO:0005576	extracellular region	IEA
ENSDARG00000103498	epd	GO:0005509	calcium ion binding	IEA
ENSDARG00000103498	epd	GO:0007160	cell-matrix adhesion	IEA
ENSDARG00000103795	zgc:113348	GO:0003676	nucleic acid binding	IEA
ENSDARG00000103795	zgc:113348
ENSDARG00000104208	zgc:172128	GO:0003676	nucleic acid binding	IEA
ENSDARG00000104208	zgc:172128	GO:0008150	biological_process	ND
ENSDARG00000104335	BX324142.3	GO:0003676	nucleic acid binding	IEA
ENSDARG00000104367	zgc:194469	GO:0006508	proteolysis	IEA
ENSDARG00000104367	zgc:194469	GO:0005737	cytoplasm	IBA
ENSDARG00000104367	zgc:194469	GO:0008234	cysteine-type peptidase activity	IEA
ENSDARG00000104367	zgc:194469	GO:0097200	cysteine-type endopeptidase activity involved in execution phase of apoptosis	IBA
ENSDARG00000104367	zgc:194469	GO:0042981	regulation of apoptotic process	IEA
ENSDARG00000104367	zgc:194469	GO:0097194	execution phase of apoptosis	IBA
ENSDARG00000104367	zgc:194469	GO:0004197	cysteine-type endopeptidase activity	IEA
ENSDARG00000104367	zgc:194469	GO:0097199	cysteine-type endopeptidase activity involved in apoptotic signaling pathway	IEA
ENSDARG00000104367	zgc:194469	GO:0097190	apoptotic signaling pathway	IEA
ENSDARG00000104890	si:ch211-76m11.3
ENSDARG00000104894	si:ch73-138e16.2	GO:0003676	nucleic acid binding	IEA
ENSDARG00000105215	kdrl	GO:0016740	transferase activity	IEA
ENSDARG00000105215	kdrl	GO:0016020	membrane	IEA
ENSDARG00000105215	kdrl	GO:0016021	integral component of membrane	IEA
ENSDARG00000105215	kdrl	GO:0000166	nucleotide binding	IEA
ENSDARG00000105215	kdrl	GO:0005524	ATP binding	IEA
ENSDARG00000105215	kdrl	GO:0004672	protein kinase activity	IEA
ENSDARG00000105215	kdrl	GO:0006468	protein phosphorylation	IEA
ENSDARG00000105215	kdrl	GO:0004713	protein tyrosine kinase activity	IEA
ENSDARG00000105215	kdrl	GO:0004714	transmembrane receptor protein tyrosine kinase activity	IEA
ENSDARG00000105215	kdrl	GO:0016301	kinase activity	IEA
ENSDARG00000105215	kdrl	GO:0007169	transmembrane receptor protein tyrosine kinase signaling pathway	IEA
ENSDARG00000105215	kdrl	GO:0016310	phosphorylation	IEA
ENSDARG00000105215	kdrl	GO:0018108	peptidyl-tyrosine phosphorylation	IEA
