# Supplementary material for: Evolutionarily novel genes are expressed in transgenic fish tumors and their orthologs are involved in development of progressive traits in humans
Source: Infect Agent Cancer. 2019 Dec 5;14:46. doi: 10.1186/s13027-019-0262-5 (PMC6896781; doi:10.1186/s13027-019-0262-5)
Supplement: Supplementary file 15 — Additional file 15. Primers for qPCR on set of genes selected to study the possibility of mifepristone influence on gene expression [file 13027_2019_262_MOESM15_ESM.xls]

## Sheet: Лист1
Primers for qPCR on set of genes selected to study the possibility of mifepristone influence on gene expression
Primer Mixes
ZGapdh2	NM_001115114.1 Danio rerio glyceraldehyde-3-phosphate dehydrogenase (gapdh), mRNA
ENSDARG00000043457	Sequence (5'->3')	Template strand	Length	Start	Stop	Tm	GC%	Self complementarity	Self 3' complementarity
ZGapdhF2	GAGGCTTCTCACAAACGAGGA	Plus	21	27	47	60.00	52.38	4.00	0.00
ZGapdhR2	ACTTTCCATGGGTGGAGTCG	Minus	20	226	207	59.68	55.00	6.00	2.00
Product length	200
ZA2ml1	NM_001139479.1 Danio rerio alpha-2-macroglobulin-like (a2ml), mRNA
	Sequence (5'->3')	Template strand	Length	Start	Stop	Tm	GC%	Self complementarity	Self 3' complementarity
ZA2mlF1	TTGCTCTAGGAATGGCTGGC	Plus	20	2124	2143	60.11	55.00	4.00	2.00
ZA2mlR1	CCCAAGTCGTGATGGTGTCA	Minus	20	2285	2266	59.97	55.00	3.00	3.00
Product length	162
Total intron size	2391 (between pos. 21120965 and 21118573 on NC_007126.7)
ZSsp3a2	NM_001130643.1 Danio rerio single stranded DNA binding protein 3a (ssbp3a), mRNA
ENSDARG00000058237	Sequence (5'->3')	Template strand	Length	Start	Stop	Tm	GC%	Self complementarity	Self 3' complementarity
ZSsp3AF2	CATAACCCTGGGTGAACCGC	Plus	20	177	196	61.03	60.00	7.00	2.00
ZSsp3AR2	ACCAGGGGGTCCCTGAAAGA	Minus	20	408	389	62.36	60.00	7.00	1.00
Product length	232
Total intron size	69588 (between pos. 11026561 and 10956887 on NC_007113.7)
ZRyply1-1	NM_001039108.1 Danio rerio ripply transcriptional repressor 1 (ripply1), mRNA
ENSDARG00000054103	Sequence (5'->3')	Template strand	Length	Start	Stop	Tm	GC%	Self complementarity	Self 3' complementarity
ZRipply1F1	GGTGCCCGGTAACACTACAA	Plus	20	250	269	59.96	55.00	4.00	0.00
ZRipply1R1	CGCTGTCGGACTCATCGTAA	Minus	20	419	400	59.90	55.00	5.00	1.00
Product length	170
Total intron size	2240 (between pos. 37970326 and 37968085 on NC_007132.7)
ZTgfR2b-2	NM_182855.3 Danio rerio transforming growth factor beta receptor 2b (tgfbr2b), mRNA
ENSDARG00000034541	Sequence (5'->3')	Template strand	Length	Start	Stop	Tm	GC%	Self complementarity	Self 3' complementarity
ZTgfbr2bF2	GGCGTGGCTCATTTGCATAG	Plus	20	1168	1187	59.97	55.00	4.00	2.00
ZTgfbr2bR2	CACCTCTGGAGCCATGTACC	Minus	20	1386	1367	59.82	60.00	4.00	2.00
Product length	219
Total intron size	6095 (between pos. 39532749 and 39526653 on NC_007127.7)
ZSobpa2	NM_001098618.1 Danio rerio sine oculis binding protein homolog (Drosophila) a (sobpa), mRNA
ENSDARG00000054253	Sequence (5'->3')	Template strand	Length	Start	Stop	Tm	GC%	Self complementarity	Self 3' complementarity
ZSobpa1F2	GGCTCTACTCCCACATCACG	Plus	20	373	392	59.90	60.00	2.00	2.00
ZSobpa1R2	CTCCCACCTTCTGACACCAC	Minus	20	556	537	59.96	60.00	3.00	0.00
Product length	184
Total intron size	9973 (between pos. 32761532 and 32771506 on NC_007124.7)
ZLepa2	NM_001128576.1 Danio rerio leptin a (lepa), mRNA
ENSDARG00000091085	Sequence (5'->3')	Template strand	Length	Start	Stop	Tm	GC%	Self complementarity	Self 3' complementarity
ZLepaF2	TGACGGGCAAAATTTACTTCC	Plus	21	138	158	57.07	42.86	6.00	1.00
ZLepaR2	GTGTGGATAGATCTCGGCGT	Minus	20	319	300	59.33	55.00	6.00	1.00
Product length	182
Exon junction	144/145 (forward primer) on template NM_001128576.1
ZCcdc40-2	NM_001271813.1 Danio rerio coiled-coil domain containing 40 (ccdc40), mRNA
ENSDARG00000100584	Sequence (5'->3')	Template strand	Length	Start	Stop	Tm	GC%	Self complementarity	Self 3' complementarity
ZCcdc40F2	CCCAGGATCTCCGCAGACTA	Plus	20	2712	2731	60.47	60.00	6.00	2.00
ZCcdc40R2	GCTGTGGTGCTGAGGGTATT	Minus	20	2938	2919	60.04	55.00	3.00	1.00
Product length	227
Total intron size	1260 (between pos. 18290518 and 18291917 on NC_007117.7)
ZSema7a-2	NM_001328508.1 Danio rerio semaphorin 7A (sema7a), transcript variant 1, mRNA
ENSDARG00000078707	Sequence (5'->3')	Template strand	Length	Start	Stop	Tm	GC%	Self complementarity	Self 3' complementarity
Zsema7aF2	AAAGCGGAAGCTCTTTGTTGG	Plus	21	1427	1447	59.66	47.62	4.00	0.00
Zsema7aR2	GCGTCTCGTCTAACTCTTCCC	Minus	21	1657	1637	60.20	57.14	2.00	0.00
Product length	231
Total intron size	9911 (between pos. 26856385 and 26866356 on NC_007136.7)
ZEphB3a-1	NM_131097.2 Danio rerio eph receptor B3a (ephb3a), mRNA
ENSDARG00000031548	Sequence (5'->3')	Template strand	Length	Start	Stop	Tm	GC%	Self complementarity	Self 3' complementarity
ZEphB3aF1	CAAGTTCTCTGTGCGGGACT	Plus	20	700	719	59.97	55.00	3.00	1.00
ZEphB3aR1	GGCCAGGTAGAAACCAGCTT	Minus	20	949	930	59.96	55.00	4.00	3.00
Product length	250
Total intron size	3542 (between pos. 7995309 and 7991766 on NC_007113.7)
ZSpry1-2	NM_001122600.1 Danio rerio sprouty homolog 1, antagonist of FGF signaling (Drosophila) (spry1), mRNA
ENSDARG00000103985	Sequence (5'->3')	Template strand	Length	Start	Stop	Tm	GC%	Self complementarity	Self 3' complementarity
ZSpry1F2	TTCGGCGGAGAACGTGATAG	Plus	20	913	932	59.90	55.00	4.00	0.00
ZSpry1R2	CCTTTAGCGGGCAGATAGCA	Minus	20	1122	1103	59.89	55.00	3.00	0.00
Product length	210
ZLmx1bb-2	NM_001025167.2 Danio rerio LIM homeobox transcription factor 1, beta b (lmx1bb), mRNA
ENSDARG00000068365	Sequence (5'->3')	Template strand	Length	Start	Stop	Tm	GC%	Self complementarity	Self 3' complementarity
ZLmx1bbF2	CTTCATGGCACGAGGAGTGT	Plus	20	433	452	60.04	55.00	5.00	0.00
ZLmx1bbR2	TTTCCTCAGCTGTCGGTCAC	Minus	20	668	649	59.97	55.00	6.00	3.00
Product length	236
Total intron size	94497 (between pos. 33380188 and 33285690 on NC_007119.7)
ZNr2E-2	NM_001003608.1 Danio rerio nuclear receptor subfamily 2, group E, member 1 (nr2e1), mRNA
ENSDARG00000017107	Sequence (5'->3')	Template strand	Length	Start	Stop	Tm	GC%	Self complementarity	Self 3' complementarity
ZNr2e1F2	AAGTGCTAAGACTGCCCTGG	Plus	20	345	364	59.67	55.00	5.00	3.00
ZNr2e1R2	CGTCACACGCATAAACACCG	Minus	20	553	534	60.18	55.00	3.00	2.00
Product length	209
Total intron size	3177 (between pos. 32445925 and 32442747 on NC_007131.7)
ZCacna1DA-2	NM_203484.1 Danio rerio calcium channel, voltage-dependent, L type, alpha 1D subunit, a (cacna1da), mRNA
ENSDARG00000102773	Sequence (5'->3')	Template strand	Length	Start	Stop	Tm	GC%	Self complementarity	Self 3' complementarity
ZCacna1daF2	GGAGTGCAAGGGAACGTACA	Plus	20	3210	3229	59.97	55.00	4.00	2.00
ZCacna1daR2	AGTCGATGGCCTTGTACAGC	Minus	20	3388	3369	60.11	55.00	6.00	2.00
Product length	179
Total intron size	3595 (between pos. 36850757 and 36847161 on NC_007122.7)
ZFus-1	NM_201083.2 Danio rerio FUS RNA binding protein (fus), mRNA
ENSDARG00000037968	Sequence (5'->3')	Template strand	Length	Start	Stop	Tm	GC%	Self complementarity	Self 3' complementarity
ZFusF1	TTACCGAAGGCGACTGTACG	Plus	20	4	23	59.83	55.00	4.00	3.00
ZfusR1	GCTGTAGCTTTGACCGGACT	Minus	20	159	140	60.04	55.00	4.00	2.00
Product length	156
Total intron size	2075 (between pos. 60492 and 62593 on NW_018395227.1)
ZCamk4-1	NM_001017607.1 Danio rerio calcium/calmodulin-dependent protein kinase IV (camk4), mRNA
ENSDARG00000005372	Sequence (5'->3')	Template strand	Length	Start	Stop	Tm	GC%	Self complementarity	Self 3' complementarity
ZCamk4F1	AGACCCCTGCGGAGATTAGT	Plus	20	343	362	60.03	55.00	4.00	2.00
Zcamk4R1	AGCAGGTTCTCGGGTTTCAG	Minus	20	529	510	59.96	55.00	2.00	1.00
Product length	187
Total intron size	20628 (between pos. 55801451 and 55780749 on NC_007116.7)
