# Supplementary material for: Evolutionarily novel genes are expressed in transgenic fish tumors and their orthologs are involved in development of progressive traits in humans
Source: Infect Agent Cancer. 2019 Dec 5;14:46. doi: 10.1186/s13027-019-0262-5 (PMC6896781; doi:10.1186/s13027-019-0262-5)
Supplement: Supplementary file 17 — Additional file 17 680 TTregEEN genes detected by OMA. [file 13027_2019_262_MOESM17_ESM.xls]

## Sheet: Лист1
680 TTregEEN genes detected by OMA
№	Ensembl Gene ID	Gene Name	Taxa
1	ENSDARG00000029544	id2b	Euteleostomi
2	ENSDARG00000052413	crfb12	Euteleostomi
3	ENSDARG00000000229	usp49	Euteleostomi
4	ENSDARG00000000551	slc1a4	Euteleostomi
5	ENSDARG00000001463	tdh2	Euteleostomi
6	ENSDARG00000001721	oc90	Euteleostomi
7	ENSDARG00000001835	nalcn	Euteleostomi
8	ENSDARG00000002333	fam102bb	Euteleostomi
9	ENSDARG00000002391	tlcd1	Euteleostomi
10	ENSDARG00000002549	eif3eb	Euteleostomi
11	ENSDARG00000002991	cep135	Euteleostomi
12	ENSDARG00000003109	rcan1a	Euteleostomi
13	ENSDARG00000003449	pde10a	Euteleostomi
14	ENSDARG00000003527	mak16	Euteleostomi
15	ENSDARG00000003576	klhl32	Euteleostomi
16	ENSDARG00000003732	mitfa	Euteleostomi
17	ENSDARG00000003903	hapln2	Euteleostomi
18	ENSDARG00000004433	btk	Euteleostomi
19	ENSDARG00000004451	tnfrsfa	Euteleostomi
20	ENSDARG00000004635	epha7	Euteleostomi
21	ENSDARG00000004712	tbr1b	Euteleostomi
22	ENSDARG00000005271	zc3h12a	Euteleostomi
23	ENSDARG00000005479	tenm3	Euteleostomi
24	ENSDARG00000005561	gfm2	Euteleostomi
25	ENSDARG00000005800	ampd3a	Euteleostomi
26	ENSDARG00000005834	gatad2b	Euteleostomi
27	ENSDARG00000006220	ugt1ab	Euteleostomi
28	ENSDARG00000006272	mpp5a	Euteleostomi
29	ENSDARG00000006341	tas1r3	Euteleostomi
30	ENSDARG00000006636	slitrk2	Euteleostomi
31	ENSDARG00000006683	arhgef6	Euteleostomi
32	ENSDARG00000006797	nt5dc1	Euteleostomi
33	ENSDARG00000006837	mycn	Euteleostomi
34	ENSDARG00000006892	myo3b	Euteleostomi
35	ENSDARG00000007369	tcf7l1b	Euteleostomi
36	ENSDARG00000007383	kcnk6	Euteleostomi
37	ENSDARG00000007461	srgap1a	Euteleostomi
38	ENSDARG00000007560	sema3bl	Euteleostomi
39	ENSDARG00000007655	crybb1l3	Euteleostomi
40	ENSDARG00000008224	vps35	Euteleostomi
41	ENSDARG00000008247	vezf1a	Euteleostomi
42	ENSDARG00000008372	spred2b	Euteleostomi
43	ENSDARG00000008377	epn2	Euteleostomi
44	ENSDARG00000008398	cacna1c	Euteleostomi
45	ENSDARG00000008542	yod1	Euteleostomi
46	ENSDARG00000008772	cacng1a	Euteleostomi
47	ENSDARG00000008849	ptprq	Euteleostomi
48	ENSDARG00000009281	dnm1b	Euteleostomi
49	ENSDARG00000009401	vcanb	Euteleostomi
50	ENSDARG00000009466	rgs9bp	Euteleostomi
51	ENSDARG00000009626	nrbp2b	Euteleostomi
52	ENSDARG00000009870	mapk8b	Euteleostomi
53	ENSDARG00000009941	erc1a	Euteleostomi
54	ENSDARG00000010018	qki2	Euteleostomi
55	ENSDARG00000010181	asap2a	Euteleostomi
56	ENSDARG00000010270	fezf1	Euteleostomi
57	ENSDARG00000010317	gpr183a	Euteleostomi
58	ENSDARG00000010408	igsf9b	Euteleostomi
59	ENSDARG00000010454	guca1a	Euteleostomi
60	ENSDARG00000010515	dvl1a	Euteleostomi
61	ENSDARG00000010764	flj13639	Euteleostomi
62	ENSDARG00000011042	pgbd5	Euteleostomi
63	ENSDARG00000011473	calcrla	Euteleostomi
64	ENSDARG00000011582	sox5	Euteleostomi
65	ENSDARG00000011600	epha4b	Euteleostomi
66	ENSDARG00000011724	marveld1	Euteleostomi
67	ENSDARG00000011801	wars2	Euteleostomi
68	ENSDARG00000011973	slc35d1a	Euteleostomi
69	ENSDARG00000012071	angptl1a	Euteleostomi
70	ENSDARG00000012125	cnga1	Euteleostomi
71	ENSDARG00000012126	zgc:109965	Euteleostomi
72	ENSDARG00000012353	vipr2	Euteleostomi
73	ENSDARG00000012366	fbp2	Euteleostomi
74	ENSDARG00000012426	neflb	Euteleostomi
75	ENSDARG00000013000	ppfia2	Euteleostomi
76	ENSDARG00000013310	map3k15	Euteleostomi
77	ENSDARG00000013438	sycp3	Euteleostomi
78	ENSDARG00000013461	supt7l	Euteleostomi
79	ENSDARG00000013596	brd1a	Euteleostomi
80	ENSDARG00000013667	tbck	Euteleostomi
81	ENSDARG00000013834	arhgef3	Euteleostomi
82	ENSDARG00000014058	rab36	Euteleostomi
83	ENSDARG00000014218	mecp2	Euteleostomi
84	ENSDARG00000014244	rbmx	Euteleostomi
85	ENSDARG00000014292	med15	Euteleostomi
86	ENSDARG00000014954	snx33	Euteleostomi
87	ENSDARG00000014962	ppp3cca	Euteleostomi
88	ENSDARG00000015010	ccdc114	Euteleostomi
89	ENSDARG00000015053	grip1	Euteleostomi
90	ENSDARG00000015355	fosl1a	Euteleostomi
91	ENSDARG00000015476	iqch	Euteleostomi
92	ENSDARG00000015552	phactr4a	Euteleostomi
93	ENSDARG00000015554	zic2a	Euteleostomi
94	ENSDARG00000015985	abcc9	Euteleostomi
95	ENSDARG00000016531	klhl4	Euteleostomi
96	ENSDARG00000016532	suco	Euteleostomi
97	ENSDARG00000016651	znf106a	Euteleostomi
98	ENSDARG00000016699	trpa1a	Euteleostomi
99	ENSDARG00000016981	bcar3	Euteleostomi
100	ENSDARG00000017107	nr2e1	Euteleostomi
101	ENSDARG00000017155	wnt10a	Euteleostomi
102	ENSDARG00000017329	cdkl1	Euteleostomi
103	ENSDARG00000017369	sema3d	Euteleostomi
104	ENSDARG00000017400	klf1	Euteleostomi
105	ENSDARG00000017617	alg6	Euteleostomi
106	ENSDARG00000017673	nova2	Euteleostomi
107	ENSDARG00000017988	dse	Euteleostomi
108	ENSDARG00000018534	slc6a9	Euteleostomi
109	ENSDARG00000018566	flnca	Euteleostomi
110	ENSDARG00000018726	slco3a1	Euteleostomi
111	ENSDARG00000018750	npr1b	Euteleostomi
112	ENSDARG00000018765	pknox1.1	Euteleostomi
113	ENSDARG00000018825	tmem248	Euteleostomi
114	ENSDARG00000019117	parvb	Euteleostomi
115	ENSDARG00000020122	endou2	Euteleostomi
116	ENSDARG00000020242	fermt2	Euteleostomi
117	ENSDARG00000020509	srd5a1	Euteleostomi
118	ENSDARG00000020758	tmem178	Euteleostomi
119	ENSDARG00000020890	tmod4	Euteleostomi
120	ENSDARG00000021150	valopa	Euteleostomi
121	ENSDARG00000021151	ptpreb	Euteleostomi
122	ENSDARG00000021154		Euteleostomi
123	ENSDARG00000021688	mxa	Euteleostomi
124	ENSDARG00000021735	cacna1ba	Euteleostomi
125	ENSDARG00000021789	myoc	Euteleostomi
126	ENSDARG00000021895	disc1	Euteleostomi
127	ENSDARG00000022020	focad	Euteleostomi
128	ENSDARG00000022187	usp6nl	Euteleostomi
129	ENSDARG00000022260		Euteleostomi
130	ENSDARG00000022512	zgc:109913	Euteleostomi
131	ENSDARG00000022895	mcf2a	Euteleostomi
132	ENSDARG00000023214	mob2a	Euteleostomi
133	ENSDARG00000023484	fam101a	Euteleostomi
134	ENSDARG00000023771	gabrb3	Euteleostomi
135	ENSDARG00000023861	dnase1l1l	Euteleostomi
136	ENSDARG00000024306	zbed4	Euteleostomi
137	ENSDARG00000024537	emilin1a	Euteleostomi
138	ENSDARG00000024546	pla2g4aa	Euteleostomi
139	ENSDARG00000024548	cryba4	Euteleostomi
140	ENSDARG00000024687	polr3g	Euteleostomi
141	ENSDARG00000025089	loxl4	Euteleostomi
142	ENSDARG00000025162	asic4a	Euteleostomi
143	ENSDARG00000025212	cpsf3l	Euteleostomi
144	ENSDARG00000025468	bnip3la	Euteleostomi
145	ENSDARG00000025808	taf5l	Euteleostomi
146	ENSDARG00000025875	kctd2	Euteleostomi
147	ENSDARG00000026166	emilin1b	Euteleostomi
148	ENSDARG00000026313	adgre5a	Euteleostomi
149	ENSDARG00000026519	ralgps2	Euteleostomi
150	ENSDARG00000027016	gbf1	Euteleostomi
151	ENSDARG00000027041	pcdh17	Euteleostomi
152	ENSDARG00000027082	hmbox1a	Euteleostomi
153	ENSDARG00000027279	numb	Euteleostomi
154	ENSDARG00000027428	rpp30	Euteleostomi
155	ENSDARG00000027582	angptl7	Euteleostomi
156	ENSDARG00000028096	si:ch211-95j8.2	Euteleostomi
157	ENSDARG00000028949	ZBTB26	Euteleostomi
158	ENSDARG00000029168	ppfibp2b	Euteleostomi
159	ENSDARG00000029766	nr1i2	Euteleostomi
160	ENSDARG00000030604	phkg1a	Euteleostomi
161	ENSDARG00000030650	r3hdml	Euteleostomi
162	ENSDARG00000030656	sept3	Euteleostomi
163	ENSDARG00000030723	cldn11b	Euteleostomi
164	ENSDARG00000030803	zgc:110006	Euteleostomi
165	ENSDARG00000031420	wt1a	Euteleostomi
166	ENSDARG00000031548	ephb3a	Euteleostomi
167	ENSDARG00000031600	rd3	Euteleostomi
168	ENSDARG00000031657	fahd1	Euteleostomi
169	ENSDARG00000031796	ache	Euteleostomi
170	ENSDARG00000031845	mboat2a	Euteleostomi
171	ENSDARG00000031848	pparg	Euteleostomi
172	ENSDARG00000032103	mapk6	Euteleostomi
173	ENSDARG00000032552	march5	Euteleostomi
174	ENSDARG00000032795	tmem8a	Euteleostomi
175	ENSDARG00000033099	kif7	Euteleostomi
176	ENSDARG00000033380	gyg2	Euteleostomi
177	ENSDARG00000033953	entpd2a.2	Euteleostomi
178	ENSDARG00000034423	sncga	Euteleostomi
179	ENSDARG00000034424	atp1b2b	Euteleostomi
180	ENSDARG00000034541	tgfbr2b	Euteleostomi
181	ENSDARG00000034572	gpr143	Euteleostomi
182	ENSDARG00000034714	esyt1a	Euteleostomi
183	ENSDARG00000035163	tmem136b	Euteleostomi
184	ENSDARG00000035308	grb10b	Euteleostomi
185	ENSDARG00000035390	tnpo1	Euteleostomi
186	ENSDARG00000035468	slc25a25b	Euteleostomi
187	ENSDARG00000035538	atp6v0a2a	Euteleostomi
188	ENSDARG00000035551	iqcd	Euteleostomi
189	ENSDARG00000035578	hs3st1l2	Euteleostomi
190	ENSDARG00000035609	mtnr1c	Euteleostomi
191	ENSDARG00000035695	scxa	Euteleostomi
192	ENSDARG00000035904	crabp1b	Euteleostomi
193	ENSDARG00000036063	ppp1r11	Euteleostomi
194	ENSDARG00000036125	nitr13	Euteleostomi
195	ENSDARG00000036147	ano5b	Euteleostomi
196	ENSDARG00000036375	cyfip2	Euteleostomi
197	ENSDARG00000036412		Euteleostomi
198	ENSDARG00000036415	glb1	Euteleostomi
199	ENSDARG00000036499	zgc:162171	Euteleostomi
200	ENSDARG00000036558	col18a1a	Euteleostomi
201	ENSDARG00000036987	has2	Euteleostomi
202	ENSDARG00000037040	cgrrf1	Euteleostomi
203	ENSDARG00000037199	zgc:101851	Euteleostomi
204	ENSDARG00000037245	trmo	Euteleostomi
205	ENSDARG00000037390	gsg1l	Euteleostomi
206	ENSDARG00000037427	si:ch211-39a7.1	Euteleostomi
207	ENSDARG00000037598	prf1.5	Euteleostomi
208	ENSDARG00000037804	phlda3	Euteleostomi
209	ENSDARG00000037813	zgc:113278	Euteleostomi
210	ENSDARG00000037954	tnnt1	Euteleostomi
211	ENSDARG00000037963	nek6	Euteleostomi
212	ENSDARG00000038609	mpz	Euteleostomi
213	ENSDARG00000038658	cavin4a	Euteleostomi
214	ENSDARG00000038770	zgc:103625	Euteleostomi
215	ENSDARG00000038788	dnai1.2	Euteleostomi
216	ENSDARG00000038814	myrip	Euteleostomi
217	ENSDARG00000039241	prkca	Euteleostomi
218	ENSDARG00000039266	rbm25a	Euteleostomi
219	ENSDARG00000039434	oprm1	Euteleostomi
220	ENSDARG00000039436	il13ra2	Euteleostomi
221	ENSDARG00000039443	zgc:110353	Euteleostomi
222	ENSDARG00000039477	terb2	Euteleostomi
223	ENSDARG00000039482	calhm2	Euteleostomi
224	ENSDARG00000039489	git1	Euteleostomi
225	ENSDARG00000039770	dync2li1	Euteleostomi
226	ENSDARG00000039871	rpz4	Euteleostomi
227	ENSDARG00000040065	gja5a	Euteleostomi
228	ENSDARG00000040110	kif20bb	Euteleostomi
229	ENSDARG00000040249	tlr18	Euteleostomi
230	ENSDARG00000040700	nab1b	Euteleostomi
231	ENSDARG00000041376	rmi1	Euteleostomi
232	ENSDARG00000041502	tgfb1a	Euteleostomi
233	ENSDARG00000041560	si:dkey-102f14.5	Euteleostomi
234	ENSDARG00000041919	ccl38.1	Euteleostomi
235	ENSDARG00000041959	cxcr4b	Euteleostomi
236	ENSDARG00000042245	myl13	Euteleostomi
237	ENSDARG00000042249	FRMD4A	Euteleostomi
238	ENSDARG00000042259	tgfbr1b	Euteleostomi
239	ENSDARG00000042555	dym	Euteleostomi
240	ENSDARG00000042732	tmem189	Euteleostomi
241	ENSDARG00000042742	stx6	Euteleostomi
242	ENSDARG00000043141	si:ch211-132f19.7	Euteleostomi
243	ENSDARG00000043283	prrg1	Euteleostomi
244	ENSDARG00000043285	zbtb21	Euteleostomi
245	ENSDARG00000043394	si:dkey-71h2.2	Euteleostomi
246	ENSDARG00000043593	rapgef1a	Euteleostomi
247	ENSDARG00000043646	slc6a8	Euteleostomi
248	ENSDARG00000043673		Euteleostomi
249	ENSDARG00000043814	st6galnac1.1	Euteleostomi
250	ENSDARG00000043858	cdk19	Euteleostomi
251	ENSDARG00000043932	stmn4l	Euteleostomi
252	ENSDARG00000044010	loxl2a	Euteleostomi
253	ENSDARG00000044144	wapla	Euteleostomi
254	ENSDARG00000044155	mafaa	Euteleostomi
255	ENSDARG00000044276	spp1	Euteleostomi
256	ENSDARG00000044280	opn1mw2	Euteleostomi
257	ENSDARG00000044373	atg4c	Euteleostomi
258	ENSDARG00000044406	lurap1	Euteleostomi
259	ENSDARG00000044615	zak	Euteleostomi
260	ENSDARG00000044766	mitd1	Euteleostomi
261	ENSDARG00000044802	aadacl4	Euteleostomi
262	ENSDARG00000044902	atp2b4	Euteleostomi
263	ENSDARG00000044976	krt93	Euteleostomi
264	ENSDARG00000045038	tekt3	Euteleostomi
265	ENSDARG00000045070	itgb3b	Euteleostomi
266	ENSDARG00000045071	chad	Euteleostomi
267	ENSDARG00000045175	pofut2	Euteleostomi
268	ENSDARG00000045289	gpr137c	Euteleostomi
269	ENSDARG00000045401	mllt10	Euteleostomi
270	ENSDARG00000045483	lrtm2a	Euteleostomi
271	ENSDARG00000045510	tbc1d22a	Euteleostomi
272	ENSDARG00000045666	ANKRD50	Euteleostomi
273	ENSDARG00000045675	mdm1	Euteleostomi
274	ENSDARG00000045708	adm2a	Euteleostomi
275	ENSDARG00000045936	pax6b	Euteleostomi
276	ENSDARG00000051915	pde5ab	Euteleostomi
277	ENSDARG00000052057	pcolceb	Euteleostomi
278	ENSDARG00000052094	notch1b	Euteleostomi
279	ENSDARG00000052242	aff2	Euteleostomi
280	ENSDARG00000052435	spred2a	Euteleostomi
281	ENSDARG00000052465	dusp10	Euteleostomi
282	ENSDARG00000052644	ca10a	Euteleostomi
283	ENSDARG00000052688	paqr5b	Euteleostomi
284	ENSDARG00000052954	rab25b	Euteleostomi
285	ENSDARG00000053512	crybb2	Euteleostomi
286	ENSDARG00000053835	plekhh1	Euteleostomi
287	ENSDARG00000054054	zgc:153219	Euteleostomi
288	ENSDARG00000054253	sobpa	Euteleostomi
289	ENSDARG00000054323	pparab	Euteleostomi
290	ENSDARG00000054373		Euteleostomi
291	ENSDARG00000054389	rhof	Euteleostomi
292	ENSDARG00000054423	slc7a6	Euteleostomi
293	ENSDARG00000054560	her15.1	Euteleostomi
294	ENSDARG00000054847	xcr1a.1	Euteleostomi
295	ENSDARG00000055106	znf148	Euteleostomi
296	ENSDARG00000055118	mylipb	Euteleostomi
297	ENSDARG00000055175	c1qtnf6a	Euteleostomi
298	ENSDARG00000055395	foxq1b	Euteleostomi
299	ENSDARG00000055439	adamtsl7	Euteleostomi
300	ENSDARG00000055552	dvl1b	Euteleostomi
301	ENSDARG00000055561	c1galt1b	Euteleostomi
302	ENSDARG00000055613	zgc:123238	Euteleostomi
303	ENSDARG00000055632	smtnl	Euteleostomi
304	ENSDARG00000055731	si:dkeyp-69e1.8	Euteleostomi
305	ENSDARG00000055874	cpe	Euteleostomi
306	ENSDARG00000055966	cflara	Euteleostomi
307	ENSDARG00000056004	sprn	Euteleostomi
308	ENSDARG00000056178	dpt	Euteleostomi
309	ENSDARG00000056395	onecut3a	Euteleostomi
310	ENSDARG00000056467	tmub2	Euteleostomi
311	ENSDARG00000056511	arr3a	Euteleostomi
312	ENSDARG00000056530	cpamd8	Euteleostomi
313	ENSDARG00000056531	nutf2	Euteleostomi
314	ENSDARG00000056619	arhgap42a	Euteleostomi
315	ENSDARG00000056625	trpc6a	Euteleostomi
316	ENSDARG00000056722	cd99l2	Euteleostomi
317	ENSDARG00000056745	necab2	Euteleostomi
318	ENSDARG00000056892	mpp6a	Euteleostomi
319	ENSDARG00000057013	cadm3	Euteleostomi
320	ENSDARG00000057017	slc6a4b	Euteleostomi
321	ENSDARG00000057032	ppm1nb	Euteleostomi
322	ENSDARG00000057055	ndufs8b	Euteleostomi
323	ENSDARG00000057230	nceh1b.2	Euteleostomi
324	ENSDARG00000057263	zgc:173729	Euteleostomi
325	ENSDARG00000057273	alox5a	Euteleostomi
326	ENSDARG00000057352	slc25a29	Euteleostomi
327	ENSDARG00000057353	ehbp1l1a	Euteleostomi
328	ENSDARG00000057435	amacr	Euteleostomi
329	ENSDARG00000057536	crygm2a	Euteleostomi
330	ENSDARG00000057590	si:ch1073-396h14.1	Euteleostomi
331	ENSDARG00000057633	cxcr4a	Euteleostomi
332	ENSDARG00000057688	ical1	Euteleostomi
333	ENSDARG00000057789	lyz	Euteleostomi
334	ENSDARG00000057942	glt8d2	Euteleostomi
335	ENSDARG00000058003	wfdc1	Euteleostomi
336	ENSDARG00000058103	glra4b	Euteleostomi
337	ENSDARG00000058147	dnajc5b	Euteleostomi
338	ENSDARG00000058178	zdhhc20b	Euteleostomi
339	ENSDARG00000058237	ssbp3a	Euteleostomi
340	ENSDARG00000058473	st6galnac3	Euteleostomi
341	ENSDARG00000058475	ern2	Euteleostomi
342	ENSDARG00000058551	popdc3	Euteleostomi
343	ENSDARG00000058673	nkl.2	Euteleostomi
344	ENSDARG00000058692	fzd3b	Euteleostomi
345	ENSDARG00000058828	ccdc51	Euteleostomi
346	ENSDARG00000058969	cntnap2a	Euteleostomi
347	ENSDARG00000058990	slc35a2	Euteleostomi
348	ENSDARG00000058992	cers2b	Euteleostomi
349	ENSDARG00000059166	slc22a13b	Euteleostomi
350	ENSDARG00000059233	runx2b	Euteleostomi
351	ENSDARG00000059475	camsap3	Euteleostomi
352	ENSDARG00000059557	xylt2	Euteleostomi
353	ENSDARG00000059693	adam19a	Euteleostomi
354	ENSDARG00000059722	ubac1	Euteleostomi
355	ENSDARG00000059760	wdtc1	Euteleostomi
356	ENSDARG00000059774	dub	Euteleostomi
357	ENSDARG00000059846	epg5	Euteleostomi
358	ENSDARG00000059993	trpm4a	Euteleostomi
359	ENSDARG00000060008	hhipl2	Euteleostomi
360	ENSDARG00000060018	si:ch1073-44g3.1	Euteleostomi
361	ENSDARG00000060096	tbc1d10ab	Euteleostomi
362	ENSDARG00000060103	cpeb3	Euteleostomi
363	ENSDARG00000060168	fam160b1	Euteleostomi
364	ENSDARG00000060319	scn4bb	Euteleostomi
365	ENSDARG00000060368	syn1	Euteleostomi
366	ENSDARG00000060534	sgpp1	Euteleostomi
367	ENSDARG00000060596	prkaa1	Euteleostomi
368	ENSDARG00000060734	appl1	Euteleostomi
369	ENSDARG00000060847	setd1ba	Euteleostomi
370	ENSDARG00000060901	trim62	Euteleostomi
371	ENSDARG00000060926	rnf19b	Euteleostomi
372	ENSDARG00000060944	rnf217	Euteleostomi
373	ENSDARG00000061021	fam160a1a	Euteleostomi
374	ENSDARG00000061096	dapk2a	Euteleostomi
375	ENSDARG00000061099	nfasca	Euteleostomi
376	ENSDARG00000061110	zbtb44	Euteleostomi
377	ENSDARG00000061121	adgrl3.1	Euteleostomi
378	ENSDARG00000061140	colec12	Euteleostomi
379	ENSDARG00000061191	plekho1a	Euteleostomi
380	ENSDARG00000061194	hectd2	Euteleostomi
381	ENSDARG00000061354	foxred2	Euteleostomi
382	ENSDARG00000061400	csgalnact2	Euteleostomi
383	ENSDARG00000061471	sema5ba	Euteleostomi
384	ENSDARG00000061549	foxo1b	Euteleostomi
385	ENSDARG00000061576	gldn	Euteleostomi
386	ENSDARG00000061687	atxn1a	Euteleostomi
387	ENSDARG00000061710	map3k8	Euteleostomi
388	ENSDARG00000061941	trpv4	Euteleostomi
389	ENSDARG00000061960	ube3b	Euteleostomi
390	ENSDARG00000062017	fsd1	Euteleostomi
391	ENSDARG00000062108	iffo1b	Euteleostomi
392	ENSDARG00000062122	klhl5	Euteleostomi
393	ENSDARG00000062173	camsap2a	Euteleostomi
394	ENSDARG00000062181	bmt2	Euteleostomi
395	ENSDARG00000062206	skiv2l	Euteleostomi
396	ENSDARG00000062268	jarid2b	Euteleostomi
397	ENSDARG00000062349	arhgap15	Euteleostomi
398	ENSDARG00000062350	synm	Euteleostomi
399	ENSDARG00000062355	axdnd1	Euteleostomi
400	ENSDARG00000062381	si:ch211-238n5.4	Euteleostomi
401	ENSDARG00000062465	pgap1	Euteleostomi
402	ENSDARG00000062579	kremen1	Euteleostomi
403	ENSDARG00000062661	abca4b	Euteleostomi
404	ENSDARG00000062904	idua	Euteleostomi
405	ENSDARG00000062933	cmip	Euteleostomi
406	ENSDARG00000062956	dagla	Euteleostomi
407	ENSDARG00000062976	iffo1a	Euteleostomi
408	ENSDARG00000063011	antxr2b	Euteleostomi
409	ENSDARG00000063075	soga1	Euteleostomi
410	ENSDARG00000063242	ttc13	Euteleostomi
411	ENSDARG00000063252	prcc	Euteleostomi
412	ENSDARG00000063288	slc2a11b	Euteleostomi
413	ENSDARG00000063361	si:ch211-1e14.1	Euteleostomi
414	ENSDARG00000063475	abcg1	Euteleostomi
415	ENSDARG00000063578		Euteleostomi
416	ENSDARG00000063684	ppm1h	Euteleostomi
417	ENSDARG00000067626	ywhag1	Euteleostomi
418	ENSDARG00000067672	card9	Euteleostomi
419	ENSDARG00000067729	arid3c	Euteleostomi
420	ENSDARG00000068365	lmx1bb	Euteleostomi
421	ENSDARG00000068409	vgll4l	Euteleostomi
422	ENSDARG00000068460	otog	Euteleostomi
423	ENSDARG00000068507	crybb1	Euteleostomi
424	ENSDARG00000068551	elovl8a	Euteleostomi
425	ENSDARG00000068657	irgq2	Euteleostomi
426	ENSDARG00000068726	masp1	Euteleostomi
427	ENSDARG00000068745	map4l	Euteleostomi
428	ENSDARG00000068849	fam83ha	Euteleostomi
429	ENSDARG00000068886	mrpl14	Euteleostomi
430	ENSDARG00000069003	pcyox1l	Euteleostomi
431	ENSDARG00000069093	col2a1a	Euteleostomi
432	ENSDARG00000069113	dbn1	Euteleostomi
433	ENSDARG00000069208	stx7l	Euteleostomi
434	ENSDARG00000069327	nkx3.3	Euteleostomi
435	ENSDARG00000069333	FP102052.1	Euteleostomi
436	ENSDARG00000069339	tbc1d24	Euteleostomi
437	ENSDARG00000069481	ghrh	Euteleostomi
438	ENSDARG00000069501	abhd11	Euteleostomi
439	ENSDARG00000069590	tmem150c	Euteleostomi
440	ENSDARG00000069698	lrguk	Euteleostomi
441	ENSDARG00000069795	zgc:154058	Euteleostomi
442	ENSDARG00000069988	arid6	Euteleostomi
443	ENSDARG00000070165	tnfrsf1b	Euteleostomi
444	ENSDARG00000070174		Euteleostomi
445	ENSDARG00000070213	etnk2	Euteleostomi
446	ENSDARG00000070272	casp8l2	Euteleostomi
447	ENSDARG00000070360	fam212aa	Euteleostomi
448	ENSDARG00000070452	saraf	Euteleostomi
449	ENSDARG00000070497	bicc1b	Euteleostomi
450	ENSDARG00000070498	phyhiplb	Euteleostomi
451	ENSDARG00000070536	creb5b	Euteleostomi
452	ENSDARG00000070598	eno4	Euteleostomi
453	ENSDARG00000070669	cxcr3.3	Euteleostomi
454	ENSDARG00000070705	zgc:64022	Euteleostomi
455	ENSDARG00000070724	chrna4b	Euteleostomi
456	ENSDARG00000070755	ccr11.1	Euteleostomi
457	ENSDARG00000070770	her4.3	Euteleostomi
458	ENSDARG00000070846	dazap1	Euteleostomi
459	ENSDARG00000070995	inpp4ab	Euteleostomi
460	ENSDARG00000071029	si:dkey-147f3.4	Euteleostomi
461	ENSDARG00000071107	wnt7bb	Euteleostomi
462	ENSDARG00000071152	pick1	Euteleostomi
463	ENSDARG00000071279	si:dkey-4c23.5	Euteleostomi
464	ENSDARG00000071374	lrrtm2	Euteleostomi
465	ENSDARG00000071389	si:dkey-78l4.6	Euteleostomi
466	ENSDARG00000071585	si:dkeyp-110e4.11	Euteleostomi
467	ENSDARG00000073688	nav2a	Euteleostomi
468	ENSDARG00000073711	mmrn2b	Euteleostomi
469	ENSDARG00000073713	vav3b	Euteleostomi
470	ENSDARG00000073848	arhgef7b	Euteleostomi
471	ENSDARG00000073999	tapt1a	Euteleostomi
472	ENSDARG00000074017	usp31	Euteleostomi
473	ENSDARG00000074132	scpp7	Euteleostomi
474	ENSDARG00000074143	myo10l3	Euteleostomi
475	ENSDARG00000074183	si:dkey-172j4.3	Euteleostomi
476	ENSDARG00000074286	hint3	Euteleostomi
477	ENSDARG00000074316	itga1	Euteleostomi
478	ENSDARG00000074329	arvcfa	Euteleostomi
479	ENSDARG00000074590	wdpcp	Euteleostomi
480	ENSDARG00000074660	rilp	Euteleostomi
481	ENSDARG00000074661	gper1	Euteleostomi
482	ENSDARG00000074723	myo10l1	Euteleostomi
483	ENSDARG00000074777	ank1b	Euteleostomi
484	ENSDARG00000074808	megf6b	Euteleostomi
485	ENSDARG00000074955	nup98	Euteleostomi
486	ENSDARG00000074968	polr2m	Euteleostomi
487	ENSDARG00000074989	sparcl1	Euteleostomi
488	ENSDARG00000075017	myzap	Euteleostomi
489	ENSDARG00000075229	slc46a2	Euteleostomi
490	ENSDARG00000075252	phrf1	Euteleostomi
491	ENSDARG00000075307	kcnq2a	Euteleostomi
492	ENSDARG00000075405	adck5	Euteleostomi
493	ENSDARG00000075433	myom2a	Euteleostomi
494	ENSDARG00000075525	cln8	Euteleostomi
495	ENSDARG00000075533	zbtb24	Euteleostomi
496	ENSDARG00000075571	bicd2	Euteleostomi
497	ENSDARG00000075624	bend5	Euteleostomi
498	ENSDARG00000075698	nkpd1	Euteleostomi
499	ENSDARG00000075706	si:ch211-106h4.9	Euteleostomi
500	ENSDARG00000075821	plxnb1a	Euteleostomi
501	ENSDARG00000075825	dlec1	Euteleostomi
502	ENSDARG00000075884	shprh	Euteleostomi
503	ENSDARG00000075919	ccser1	Euteleostomi
504	ENSDARG00000075975	slc45a3	Euteleostomi
505	ENSDARG00000075980	tmem125b	Euteleostomi
506	ENSDARG00000076020	pappa2	Euteleostomi
507	ENSDARG00000076055	rpgrip1	Euteleostomi
508	ENSDARG00000076068	crtc1a	Euteleostomi
509	ENSDARG00000076153	lca5	Euteleostomi
510	ENSDARG00000076246	prune	Euteleostomi
511	ENSDARG00000076251	irf3	Euteleostomi
512	ENSDARG00000076292	tns2a	Euteleostomi
513	ENSDARG00000076308	pdp1	Euteleostomi
514	ENSDARG00000076318	atp6v1ab	Euteleostomi
515	ENSDARG00000076343	si:dkeyp-13d11.1	Euteleostomi
516	ENSDARG00000076348	mylk3	Euteleostomi
517	ENSDARG00000076434	ARHGAP22 (1 of many)	Euteleostomi
518	ENSDARG00000076530	jac6	Euteleostomi
519	ENSDARG00000076557	bicc2	Euteleostomi
520	ENSDARG00000076592	man1b1b	Euteleostomi
521	ENSDARG00000076848	LGALS3BP (1 of many)	Euteleostomi
522	ENSDARG00000076958	jac8	Euteleostomi
523	ENSDARG00000077002	igsf3	Euteleostomi
524	ENSDARG00000077120	arid5a	Euteleostomi
525	ENSDARG00000077341	ppp1r14c	Euteleostomi
526	ENSDARG00000077557	nitr5	Euteleostomi
527	ENSDARG00000077573	tmprss13b	Euteleostomi
528	ENSDARG00000077590	arsj	Euteleostomi
529	ENSDARG00000077792	cdc42ep1b	Euteleostomi
530	ENSDARG00000077853	ttll2	Euteleostomi
531	ENSDARG00000077948	usp54a	Euteleostomi
532	ENSDARG00000077979	tmem26a	Euteleostomi
533	ENSDARG00000077998	nitr3a	Euteleostomi
534	ENSDARG00000078001	kbtbd7	Euteleostomi
535	ENSDARG00000078066	elk1	Euteleostomi
536	ENSDARG00000078102	si:ch211-150i13.1	Euteleostomi
537	ENSDARG00000078179	fndc3ba	Euteleostomi
538	ENSDARG00000078185	pacs2	Euteleostomi
539	ENSDARG00000078222	aatka	Euteleostomi
540	ENSDARG00000078238	nacc1b	Euteleostomi
541	ENSDARG00000078251		Euteleostomi
542	ENSDARG00000078258		Euteleostomi
543	ENSDARG00000078479	mocs1	Euteleostomi
544	ENSDARG00000078508		Euteleostomi
545	ENSDARG00000078561	lrig2	Euteleostomi
546	ENSDARG00000078603	myo1hb	Euteleostomi
547	ENSDARG00000078650	kcna4	Euteleostomi
548	ENSDARG00000078707	sema7a	Euteleostomi
549	ENSDARG00000079071	jam2b	Euteleostomi
550	ENSDARG00000079079	sult1st7	Euteleostomi
551	ENSDARG00000079280	dhrsx	Euteleostomi
552	ENSDARG00000079286	bcr	Euteleostomi
553	ENSDARG00000079470	cdk17	Euteleostomi
554	ENSDARG00000079502	gal3st2	Euteleostomi
555	ENSDARG00000079611	sema4c	Euteleostomi
556	ENSDARG00000079784	si:ch211-235o23.1	Euteleostomi
557	ENSDARG00000086037	jam3a	Euteleostomi
558	ENSDARG00000086104	slco5a1b	Euteleostomi
559	ENSDARG00000086166	si:ch211-286b5.9	Euteleostomi
560	ENSDARG00000086272	si:dkey-4p15.5	Euteleostomi
561	ENSDARG00000086585	nrg2b	Euteleostomi
562	ENSDARG00000086856	stk35	Euteleostomi
563	ENSDARG00000086933	tnni3k	Euteleostomi
564	ENSDARG00000086985	klc4	Euteleostomi
565	ENSDARG00000087074	znf574	Euteleostomi
566	ENSDARG00000087262	zgc:63568	Euteleostomi
567	ENSDARG00000087921	plce1	Euteleostomi
568	ENSDARG00000088124	adrb2a	Euteleostomi
569	ENSDARG00000088222	fam78ab	Euteleostomi
570	ENSDARG00000089216	zmp:0000001268	Euteleostomi
571	ENSDARG00000089354	tspan4a	Euteleostomi
572	ENSDARG00000089357	fam73b	Euteleostomi
573	ENSDARG00000089413	mbpb	Euteleostomi
574	ENSDARG00000089477	si:ch211-132g1.3	Euteleostomi
575	ENSDARG00000089581	nhlrc2	Euteleostomi
576	ENSDARG00000089637	rnaseh2c	Euteleostomi
577	ENSDARG00000089888	daglb	Euteleostomi
578	ENSDARG00000089913	cacna1g	Euteleostomi
579	ENSDARG00000089952		Euteleostomi
580	ENSDARG00000089957	lgi2a	Euteleostomi
581	ENSDARG00000090035	rtn4r	Euteleostomi
582	ENSDARG00000090039	reck	Euteleostomi
583	ENSDARG00000090190	bcam	Euteleostomi
584	ENSDARG00000090338	fam20cb	Euteleostomi
585	ENSDARG00000090537	ifit11	Euteleostomi
586	ENSDARG00000090679	si:ch211-79k12.2	Euteleostomi
587	ENSDARG00000090820	slc2a10	Euteleostomi
588	ENSDARG00000090890	cmklr1	Euteleostomi
589	ENSDARG00000091215	rpz2	Euteleostomi
590	ENSDARG00000091236	cst14b.2	Euteleostomi
591	ENSDARG00000091619	mvb12ba	Euteleostomi
592	ENSDARG00000091699	capn2a	Euteleostomi
593	ENSDARG00000091791	or111-5	Euteleostomi
594	ENSDARG00000091835		Euteleostomi
595	ENSDARG00000091993	dicp1.1	Euteleostomi
596	ENSDARG00000092162	mhc1zaa	Euteleostomi
597	ENSDARG00000092352	jac4	Euteleostomi
598	ENSDARG00000092532	si:dkey-21e2.4	Euteleostomi
599	ENSDARG00000092567	si:dkey-61l1.4	Euteleostomi
600	ENSDARG00000092776	si:ch73-209l12.1	Euteleostomi
601	ENSDARG00000092883	si:dkey-193b15.5	Euteleostomi
602	ENSDARG00000092987	zmat4a	Euteleostomi
603	ENSDARG00000093349	si:ch211-141e20.2	Euteleostomi
604	ENSDARG00000094426	her4.2	Euteleostomi
605	ENSDARG00000094451	cfp	Euteleostomi
606	ENSDARG00000094514	si:dkey-7l6.3	Euteleostomi
607	ENSDARG00000094540	si:dkey-96l17.6	Euteleostomi
608	ENSDARG00000095772	si:dkey-11o1.2	Euteleostomi
609	ENSDARG00000096214	si:ch211-197k17.3	Euteleostomi
610	ENSDARG00000098245	cidea	Euteleostomi
611	ENSDARG00000098376	si:ch211-207l14.1	Euteleostomi
612	ENSDARG00000098573	sgcd	Euteleostomi
613	ENSDARG00000098612	chrm2a	Euteleostomi
614	ENSDARG00000098663	fgf19	Euteleostomi
615	ENSDARG00000098738	scn4aa	Euteleostomi
616	ENSDARG00000098745	tfec	Euteleostomi
617	ENSDARG00000099015	wacb	Euteleostomi
618	ENSDARG00000099101	gch2	Euteleostomi
619	ENSDARG00000099149	hs3st3b1a	Euteleostomi
620	ENSDARG00000099609	tpbga	Euteleostomi
621	ENSDARG00000099728	zgc:56622	Euteleostomi
622	ENSDARG00000099849	ebf1a	Euteleostomi
623	ENSDARG00000099911	lrrc8c	Euteleostomi
624	ENSDARG00000100022	JMJD1C (1 of many)	Euteleostomi
625	ENSDARG00000100397	pde6c	Euteleostomi
626	ENSDARG00000100398	pax7a	Euteleostomi
627	ENSDARG00000100426	fam167b	Euteleostomi
628	ENSDARG00000100462	paqr7a	Euteleostomi
629	ENSDARG00000100584	ccdc40	Euteleostomi
630	ENSDARG00000100591	sox32	Euteleostomi
631	ENSDARG00000100606		Euteleostomi
632	ENSDARG00000100680	slc22a17	Euteleostomi
633	ENSDARG00000100862	gprc5c	Euteleostomi
634	ENSDARG00000100973	arhgap24	Euteleostomi
635	ENSDARG00000101449	grik5	Euteleostomi
636	ENSDARG00000101471	fgd4a	Euteleostomi
637	ENSDARG00000101644	ARHGEF17	Euteleostomi
638	ENSDARG00000101914	metrnl	Euteleostomi
639	ENSDARG00000102018	bty	Euteleostomi
640	ENSDARG00000102025	znf644b	Euteleostomi
641	ENSDARG00000102060	zgc:92873	Euteleostomi
642	ENSDARG00000102142	ece2b	Euteleostomi
643	ENSDARG00000102225	si:ch211-205a14.7	Euteleostomi
644	ENSDARG00000102233	oxld1	Euteleostomi
645	ENSDARG00000102414	myhz1.1	Euteleostomi
646	ENSDARG00000102424		Euteleostomi
647	ENSDARG00000102551	jazf1a	Euteleostomi
648	ENSDARG00000102701	eva1ba	Euteleostomi
649	ENSDARG00000102704	si:ch1073-376c22.1	Euteleostomi
650	ENSDARG00000102773	cacna1da	Euteleostomi
651	ENSDARG00000102828	mfsd11	Euteleostomi
652	ENSDARG00000102889	sept15	Euteleostomi
653	ENSDARG00000102912	gpr184	Euteleostomi
654	ENSDARG00000103494	usp43a	Euteleostomi
655	ENSDARG00000103498	epd	Euteleostomi
656	ENSDARG00000103607	wtip	Euteleostomi
657	ENSDARG00000103714	rab6a	Euteleostomi
658	ENSDARG00000103783	cyyr1	Euteleostomi
659	ENSDARG00000103978	sh3bp5b	Euteleostomi
660	ENSDARG00000103985	spry1	Euteleostomi
661	ENSDARG00000104367	zgc:194469	Euteleostomi
662	ENSDARG00000104793	dgke	Euteleostomi
663	ENSDARG00000104864	klhdc2	Euteleostomi
664	ENSDARG00000104890	si:ch211-76m11.3	Euteleostomi
665	ENSDARG00000105040	fam69c	Euteleostomi
666	ENSDARG00000105088	tenm4	Euteleostomi
667	ENSDARG00000105114	crebrf	Euteleostomi
668	ENSDARG00000105120	gab2	Euteleostomi
669	ENSDARG00000105215	kdrl	Euteleostomi
670	ENSDARG00000105281	p2ry1	Euteleostomi
671	ENSDARG00000105287	mpp1	Euteleostomi
672	ENSDARG00000043923	sox9b	Euteleostomi
673	ENSDARG00000091085	lepa	Euteleostomi
674	ENSDARG00000075045	cxcl18b	Euteleostomi
675	ENSDARG00000092489	si:ch73-103b9	Euteleostomi
676	ENSDARG00000070141	si:ch211-191i18.2	Euteleostomi
677	ENSDARG00000042683	si:dkey-15j16.3	Euteleostomi
678	ENSDARG00000068742	CR384085.1	Euteleostomi
679	ENSDARG00000055283	id2a	Euteleostomi
680	ENSDARG00000100584	ccdc40	Euteleostomi
